# Supplementary material
Source: publisher figshare collection journal article supplement (https://acs.figshare.com/ndownloader/files/5452232)
Supplement: Supplementary file 1 [file 5452232]

 
data_Complex_1
_publ_requested_journal          Inorg.Chem.
_publ_contact_author_name        'Christopher L. Cahill'
_publ_contact_author_address     
;Department of Chemistry              
George Washington University      
800 22nd Street, NW, Suite 4000                     
Washington, DC 20052
;
_publ_contact_author_email       cahill@gwu.edu
_publ_contact_author_phone       '(202)994 6959'
_publ_contact_author_fax         '(202)994 5873'
loop_
_publ_author_name
_publ_author_address
'Cahill, Christopher L. '
;Department of Chemistry              
George Washington University      
800 22nd Street, NW, Suite 4000                     
Washington, DC 20052
;
'Carter, Korey P.'
;Department of Chemistry              
George Washington University      
800 22nd Street, NW, Suite 4000                     
Washington, DC 20052
;
'Thomas, Kara E.'
;Department of Chemistry              
George Washington University      
800 22nd Street, NW, Suite 4000                     
Washington, DC 20052
;
'Pope, Simon J. A.'
;School of Chemistry
Main Building
Cardiff University
Cymru/Wales
CF10 3AT U.K.
;
'Butcher, Ray J. '
;Department of Chemistry
Howard University
525 College Street, NW
Washington, DC 20059
;
'Holmberg, Rebecca J. '
;Department of Chemistry and Biomolecular Sciences
University of Ottawa
10 Marie Curie
Ottawa, ON, Canada, K1N 6N5
;
'Murugesu, Muralee'
;Department of Chemistry and Biomolecular Sciences
University of Ottawa
10 Marie Curie
Ottawa, ON, Canada, K1N 6N5
;

_audit_creation_method           SHELXL-2014
_chemical_name_systematic        ?
_chemical_name_common            ?
_chemical_formula_moiety         ?
_chemical_formula_sum            'C72 H40 Cl12 La2 N6 O12'
_exptl_crystal_recrystallization_method Hydrothermal
_chemical_melting_point          ?

_exptl_crystal_description       Plate
_exptl_crystal_colour            Colorless

_diffrn_ambient_temperature      100(2)
_chemical_formula_weight         1884.32

loop_
_atom_type_symbol
_atom_type_description
_atom_type_scat_dispersion_real
_atom_type_scat_dispersion_imag
_atom_type_scat_source
C C 0.0033 0.0016 'International Tables Vol C Tables 4.2.6.8 and 6.1.1.4'
H H 0.0000 0.0000 'International Tables Vol C Tables 4.2.6.8 and 6.1.1.4'
N N 0.0061 0.0033 'International Tables Vol C Tables 4.2.6.8 and 6.1.1.4'
O O 0.0106 0.0060 'International Tables Vol C Tables 4.2.6.8 and 6.1.1.4'
Cl Cl 0.1484 0.1585 'International Tables Vol C Tables 4.2.6.8 and 6.1.1.4'
La La -0.2871 2.4523 'International Tables Vol C Tables 4.2.6.8 and 6.1.1.4'

_space_group_crystal_system      triclinic
_space_group_IT_number           2
_space_group_name_H-M_alt        'P -1'
_space_group_name_Hall           '-P 1'

_shelx_space_group_comment       
;
The symmetry employed for this shelxl refinement is uniquely defined
by the following loop, which should always be used as a source of
symmetry information in preference to the above space-group names.
They are only intended as comments.
;

loop_
_space_group_symop_operation_xyz
'x, y, z'
'-x, -y, -z'

_cell_length_a                   12.3170(10)
_cell_length_b                   12.3233(10)
_cell_length_c                   14.1422(12)
_cell_angle_alpha                67.844(10)
_cell_angle_beta                 73.242(11)
_cell_angle_gamma                67.030(10)
_cell_volume                     1805.2(3)
_cell_formula_units_Z            1
_cell_measurement_temperature    100(2)
_cell_measurement_reflns_used    23176
_cell_measurement_theta_min      5.198
_cell_measurement_theta_max      52.052
_exptl_crystal_density_meas      ?
_exptl_crystal_density_method    ?
_exptl_crystal_density_diffrn    1.733
_exptl_crystal_F_000             928
_exptl_transmission_factor_min   ?
_exptl_transmission_factor_max   ?
_exptl_crystal_size_max          0.24
_exptl_crystal_size_mid          0.18
_exptl_crystal_size_min          0.13
_exptl_absorpt_coefficient_mu    1.678
_shelx_estimated_absorpt_T_min   ?
_shelx_estimated_absorpt_T_max   ?
_exptl_absorpt_correction_type   empirical
_exptl_absorpt_correction_T_min  0.6736
_exptl_absorpt_correction_T_max  0.7455
_exptl_absorpt_process_details   'SADABS, Bruker-AXS (2008)'

_exptl_special_details           
;
 ?
;
_diffrn_radiation_probe          x-ray
_diffrn_radiation_type           MoK\a
_diffrn_radiation_wavelength     0.71073
_diffrn_source                   'fine-focus sealed tube'
_diffrn_measurement_device_type  'Bruker APEX II CCD'
_diffrn_measurement_method       'omega scans'
_diffrn_detector_area_resol_mean ?
_diffrn_reflns_number            23175
_diffrn_reflns_av_unetI/netI     0.0584
_diffrn_reflns_av_R_equivalents  0.0492
_diffrn_reflns_limit_h_min       -15
_diffrn_reflns_limit_h_max       15
_diffrn_reflns_limit_k_min       -15
_diffrn_reflns_limit_k_max       15
_diffrn_reflns_limit_l_min       -18
_diffrn_reflns_limit_l_max       18
_diffrn_reflns_theta_min         1.576
_diffrn_reflns_theta_max         27.063
_diffrn_reflns_theta_full        25.500
_diffrn_measured_fraction_theta_max 0.998
_diffrn_measured_fraction_theta_full 1.000
_diffrn_reflns_Laue_measured_fraction_max 0.998
_diffrn_reflns_Laue_measured_fraction_full 1.000
_diffrn_reflns_point_group_measured_fraction_max 0.998
_diffrn_reflns_point_group_measured_fraction_full 1.000
_reflns_number_total             7916
_reflns_number_gt                6560
_reflns_threshold_expression     'I > 2\s(I)'
_reflns_Friedel_coverage         0.000
_reflns_Friedel_fraction_max     .
_reflns_Friedel_fraction_full    .

_reflns_special_details          
;
 Reflections were merged by SHELXL according to the crystal
 class for the calculation of statistics and refinement.
 
 _reflns_Friedel_fraction is defined as the number of unique
 Friedel pairs measured divided by the number that would be
 possible theoretically, ignoring centric projections and
 systematic absences.
;

_computing_data_collection       'APEX, Bruker-AXS'
_computing_cell_refinement       'SAINT, Bruker-AXS'
_computing_data_reduction        'SAINT, Bruker-AXS'
_computing_structure_solution    'SIR92 (Gualardi, 1994)'
_computing_structure_refinement  'SHELXL-2014 (Sheldrick, 2014)'
_computing_molecular_graphics    'WINGX (Farrugia, 2012)'
_computing_publication_material  'Crystal Maker (Palmer, 2009)'

_refine_special_details          
;
 ?
;
_refine_ls_structure_factor_coef Fsqd
_refine_ls_matrix_type           full
_refine_ls_weighting_scheme      calc
_refine_ls_weighting_details     
'w=1/[\s^2^(Fo^2^)+(0.0217P)^2^+0.3621P] where P=(Fo^2^+2Fc^2^)/3'
_atom_sites_solution_primary     ?
_atom_sites_solution_secondary   ?
_atom_sites_solution_hydrogens   geom
_refine_ls_hydrogen_treatment    constr
_refine_ls_extinction_method     none
_refine_ls_extinction_coef       .
_refine_ls_number_reflns         7916
_refine_ls_number_parameters     469
_refine_ls_number_restraints     6
_refine_ls_R_factor_all          0.0468
_refine_ls_R_factor_gt           0.0332
_refine_ls_wR_factor_ref         0.0632
_refine_ls_wR_factor_gt          0.0589
_refine_ls_goodness_of_fit_ref   1.015
_refine_ls_restrained_S_all      1.121
_refine_ls_shift/su_max          0.003
_refine_ls_shift/su_mean         0.000

loop_
_atom_site_label
_atom_site_type_symbol
_atom_site_fract_x
_atom_site_fract_y
_atom_site_fract_z
_atom_site_U_iso_or_equiv
_atom_site_adp_type
_atom_site_occupancy
_atom_site_site_symmetry_order
_atom_site_calc_flag
_atom_site_refinement_flags_posn
_atom_site_refinement_flags_adp
_atom_site_refinement_flags_occupancy
_atom_site_disorder_assembly
_atom_site_disorder_group
La1 La 0.09934(2) 0.33401(2) 0.44717(2) 0.00950(5) Uani 1 1 d . . . . .
Cl3 Cl 0.50677(7) 0.52446(7) 0.66067(6) 0.02250(18) Uani 1 1 d . . . . .
Cl5 Cl 0.34410(8) 0.82161(8) 0.00013(6) 0.0265(2) Uani 1 1 d . . . . .
Cl6 Cl -0.10023(8) 1.06928(7) 0.15276(6) 0.02443(19) Uani 1 1 d . . . . .
Cl1 Cl 0.11727(9) 0.26969(8) -0.07841(6) 0.0314(2) Uani 1 1 d . . . . .
Cl4 Cl 0.44030(12) 0.09409(10) 0.90735(9) 0.0616(4) Uani 1 1 d . U . . .
Cl2 Cl -0.32908(10) 0.54183(13) 0.03658(9) 0.0648(4) Uani 1 1 d . . . . .
O6 O -0.01956(17) 0.41145(18) 0.60425(15) 0.0126(4) Uani 1 1 d . . . . .
O4 O 0.23026(18) 0.22898(18) 0.59089(15) 0.0150(5) Uani 1 1 d . . . . .
O3 O 0.23956(18) 0.41500(18) 0.49070(15) 0.0133(4) Uani 1 1 d . . . . .
O2 O -0.07355(18) 0.41832(18) 0.33546(15) 0.0153(5) Uani 1 1 d . . . . .
O1 O 0.08874(19) 0.26633(18) 0.30242(15) 0.0162(5) Uani 1 1 d . . . . .
O5 O 0.15006(18) 0.49581(18) 0.28228(15) 0.0154(5) Uani 1 1 d . . . . .
N2 N 0.1795(2) 0.0813(2) 0.50209(18) 0.0124(5) Uani 1 1 d . . . . .
N1 N -0.0529(2) 0.2087(2) 0.54540(18) 0.0121(5) Uani 1 1 d . . . . .
N3 N 0.3214(2) 0.2172(2) 0.36788(19) 0.0139(5) Uani 1 1 d . . . . .
C36 C 0.0033(3) 0.8231(3) 0.2299(2) 0.0133(6) Uani 1 1 d . . . . .
H36 H -0.0668 0.8238 0.2778 0.016 Uiso 1 1 calc R U . . .
C24 C 0.3315(3) 0.3217(3) 0.6426(2) 0.0115(6) Uani 1 1 d . . . . .
C5 C -0.0216(3) 0.0850(3) 0.5887(2) 0.0127(6) Uani 1 1 d . . . . .
C32 C 0.2016(3) 0.7128(3) 0.1600(2) 0.0160(7) Uani 1 1 d . . . . .
H32 H 0.2638 0.6393 0.1604 0.019 Uiso 1 1 calc R U . . .
C10 C 0.2962(3) 0.0203(3) 0.4782(2) 0.0162(7) Uani 1 1 d . . . . .
C29 C 0.3498(3) 0.2234(3) 0.7311(2) 0.0184(7) Uani 1 1 d . . . . .
H29 H 0.3180 0.1604 0.7463 0.022 Uiso 1 1 calc R U . . .
C25 C 0.3779(2) 0.4170(3) 0.6198(2) 0.0125(6) Uani 1 1 d . . . . .
H25 H 0.3655 0.4838 0.5601 0.015 Uiso 1 1 calc R U . . .
C17 C -0.0430(3) 0.3683(3) 0.1791(2) 0.0149(7) Uani 1 1 d . . . . .
C31 C 0.0962(3) 0.7135(3) 0.2316(2) 0.0118(6) Uani 1 1 d . . . . .
C26 C 0.4428(3) 0.4096(3) 0.6881(2) 0.0140(6) Uani 1 1 d . . . . .
C27 C 0.4639(3) 0.3113(3) 0.7771(2) 0.0186(7) Uani 1 1 d . . . . .
H27 H 0.5087 0.3074 0.8218 0.022 Uiso 1 1 calc R U . . .
C33 C 0.2117(3) 0.8228(3) 0.0887(2) 0.0173(7) Uani 1 1 d . . . . .
C34 C 0.1206(3) 0.9332(3) 0.0853(2) 0.0197(7) Uani 1 1 d . . . . .
H34 H 0.1290 1.0067 0.0369 0.024 Uiso 1 1 calc R U . . .
C6 C 0.1074(3) 0.0154(3) 0.5668(2) 0.0129(6) Uani 1 1 d . . . . .
C1 C -0.1680(3) 0.2762(3) 0.5633(2) 0.0162(7) Uani 1 1 d . . . . .
H1 H -0.1897 0.3614 0.5332 0.019 Uiso 1 1 calc R U . . .
C15 C 0.3856(3) 0.2850(3) 0.2934(2) 0.0176(7) Uani 1 1 d . . . . .
H15 H 0.3505 0.3703 0.2715 0.021 Uiso 1 1 calc R U . . .
C11 C 0.3716(3) 0.0937(3) 0.3997(2) 0.0156(7) Uani 1 1 d . . . . .
C22 C -0.1579(3) 0.4393(3) 0.1585(2) 0.0221(8) Uani 1 1 d . . . . .
H22 H -0.2150 0.4755 0.2065 0.027 Uiso 1 1 calc R U . . .
C4 C -0.1060(3) 0.0269(3) 0.6516(2) 0.0167(7) Uani 1 1 d . . . . .
H4 H -0.0830 -0.0585 0.6806 0.020 Uiso 1 1 calc R U . . .
C8 C 0.2702(3) -0.1730(3) 0.5896(3) 0.0233(8) Uani 1 1 d . . . . .
H8 H 0.3009 -0.2579 0.6196 0.028 Uiso 1 1 calc R U . . .
C28 C 0.4160(3) 0.2191(3) 0.7971(3) 0.0249(8) Uani 1 1 d . . . . .
C18 C 0.0415(3) 0.3142(3) 0.1069(2) 0.0184(7) Uani 1 1 d . . . . .
H18 H 0.1179 0.2652 0.1211 0.022 Uiso 1 1 calc R U . . .
C7 C 0.1505(3) -0.1124(3) 0.6118(2) 0.0183(7) Uani 1 1 d . . . . .
H7 H 0.0988 -0.1556 0.6561 0.022 Uiso 1 1 calc R U . . .
C21 C -0.1856(3) 0.4551(3) 0.0651(3) 0.0275(8) Uani 1 1 d . . . . .
C2 C -0.2556(3) 0.2241(3) 0.6248(3) 0.0225(8) Uani 1 1 d . . . . .
H2 H -0.3348 0.2734 0.6354 0.027 Uiso 1 1 calc R U . . .
C3 C -0.2237(3) 0.0979(3) 0.6702(2) 0.0222(8) Uani 1 1 d . . . . .
H3 H -0.2810 0.0611 0.7129 0.027 Uiso 1 1 calc R U . . .
C9 C 0.3446(3) -0.1070(3) 0.5225(2) 0.0210(7) Uani 1 1 d . . . . .
H9 H 0.4260 -0.1466 0.5069 0.025 Uiso 1 1 calc R U . . .
C19 C 0.0109(3) 0.3339(3) 0.0138(2) 0.0195(7) Uani 1 1 d . . . . .
C14 C 0.5015(3) 0.2345(3) 0.2475(3) 0.0221(7) Uani 1 1 d . . . . .
H14 H 0.5429 0.2844 0.1957 0.026 Uiso 1 1 calc R U . . .
C35 C 0.0161(3) 0.9315(3) 0.1561(2) 0.0168(7) Uani 1 1 d . . . . .
C20 C -0.1023(3) 0.4046(3) -0.0090(2) 0.0241(8) Uani 1 1 d . . . . .
H20 H -0.1219 0.4177 -0.0721 0.029 Uiso 1 1 calc R U . . .
C13 C 0.5533(3) 0.1083(3) 0.2809(3) 0.0277(8) Uani 1 1 d . . . . .
H13 H 0.6309 0.0711 0.2521 0.033 Uiso 1 1 calc R U . . .
C16 C -0.0078(3) 0.3507(3) 0.2795(2) 0.0133(6) Uani 1 1 d . . . . .
C12 C 0.4887(3) 0.0376(3) 0.3576(3) 0.0236(8) Uani 1 1 d . . . . .
H12 H 0.5231 -0.0477 0.3814 0.028 Uiso 1 1 calc R U . . .
C23 C 0.2616(3) 0.3236(3) 0.5692(2) 0.0112(6) Uani 1 1 d . . . . .
C30 C 0.0875(3) 0.5921(3) 0.3079(2) 0.0124(6) Uani 1 1 d . . . . .

loop_
_atom_site_aniso_label
_atom_site_aniso_U_11
_atom_site_aniso_U_22
_atom_site_aniso_U_33
_atom_site_aniso_U_23
_atom_site_aniso_U_13
_atom_site_aniso_U_12
La1 0.01196(9) 0.00869(9) 0.00913(9) -0.00289(6) -0.00111(6) -0.00482(7)
Cl3 0.0258(4) 0.0191(4) 0.0294(5) -0.0044(4) -0.0119(4) -0.0117(4)
Cl5 0.0250(5) 0.0330(5) 0.0178(4) 0.0008(4) 0.0022(3) -0.0175(4)
Cl6 0.0359(5) 0.0136(4) 0.0185(4) -0.0025(3) -0.0081(4) -0.0021(4)
Cl1 0.0464(6) 0.0337(5) 0.0183(4) -0.0153(4) 0.0032(4) -0.0158(4)
Cl4 0.0872(8) 0.0513(7) 0.0557(7) 0.0365(5) -0.0586(6) -0.0488(6)
Cl2 0.0418(7) 0.0991(10) 0.0492(7) -0.0418(7) -0.0320(6) 0.0180(7)
O6 0.0154(11) 0.0133(11) 0.0106(11) -0.0051(9) 0.0007(9) -0.0067(9)
O4 0.0184(12) 0.0129(11) 0.0156(11) -0.0032(9) -0.0038(9) -0.0072(9)
O3 0.0177(11) 0.0121(11) 0.0107(11) -0.0006(9) -0.0041(9) -0.0066(9)
O2 0.0180(12) 0.0167(11) 0.0120(11) -0.0071(9) -0.0010(9) -0.0047(10)
O1 0.0216(12) 0.0122(11) 0.0153(11) -0.0054(9) -0.0064(9) -0.0023(10)
O5 0.0186(12) 0.0127(11) 0.0145(11) -0.0063(9) 0.0001(9) -0.0047(9)
N2 0.0163(14) 0.0099(13) 0.0135(13) -0.0048(11) -0.0039(11) -0.0045(11)
N1 0.0153(13) 0.0117(13) 0.0132(13) -0.0053(11) -0.0030(10) -0.0065(11)
N3 0.0151(14) 0.0153(14) 0.0148(13) -0.0073(11) -0.0016(11) -0.0064(11)
C36 0.0186(17) 0.0144(16) 0.0104(15) -0.0044(13) -0.0037(13) -0.0073(13)
C24 0.0089(15) 0.0137(15) 0.0136(15) -0.0071(13) -0.0018(12) -0.0025(12)
C5 0.0214(17) 0.0129(15) 0.0092(15) -0.0035(12) -0.0055(12) -0.0085(13)
C32 0.0186(17) 0.0171(16) 0.0117(16) -0.0031(13) -0.0009(13) -0.0073(14)
C10 0.0186(17) 0.0154(16) 0.0179(17) -0.0067(13) -0.0073(13) -0.0042(14)
C29 0.0215(18) 0.0150(17) 0.0189(17) 0.0008(14) -0.0087(14) -0.0078(14)
C25 0.0106(15) 0.0118(15) 0.0117(15) -0.0016(12) -0.0022(12) -0.0017(12)
C17 0.0242(18) 0.0113(15) 0.0111(15) 0.0015(12) -0.0046(13) -0.0112(14)
C31 0.0182(16) 0.0125(15) 0.0099(15) -0.0054(12) -0.0034(12) -0.0074(13)
C26 0.0097(15) 0.0123(15) 0.0191(16) -0.0055(13) -0.0025(13) -0.0019(13)
C27 0.0153(17) 0.0235(18) 0.0188(17) -0.0033(14) -0.0102(13) -0.0057(14)
C33 0.0235(18) 0.0222(18) 0.0096(15) -0.0032(13) -0.0021(13) -0.0126(15)
C34 0.032(2) 0.0147(17) 0.0150(17) 0.0005(13) -0.0070(14) -0.0129(15)
C6 0.0187(17) 0.0133(15) 0.0117(15) -0.0058(13) -0.0040(13) -0.0070(13)
C1 0.0178(17) 0.0127(16) 0.0199(17) -0.0091(14) -0.0038(13) -0.0021(13)
C15 0.0152(16) 0.0170(17) 0.0214(17) -0.0069(14) -0.0003(13) -0.0069(14)
C11 0.0136(16) 0.0160(16) 0.0187(17) -0.0081(14) -0.0030(13) -0.0032(13)
C22 0.0193(18) 0.031(2) 0.0184(18) -0.0124(15) -0.0021(14) -0.0062(16)
C4 0.0224(18) 0.0160(16) 0.0146(16) -0.0035(13) -0.0035(13) -0.0099(14)
C8 0.033(2) 0.0101(16) 0.0243(19) -0.0037(14) -0.0081(16) -0.0028(15)
C28 0.026(2) 0.0233(19) 0.0213(18) 0.0075(15) -0.0131(15) -0.0113(16)
C18 0.0247(18) 0.0154(16) 0.0180(17) -0.0054(14) -0.0037(14) -0.0090(14)
C7 0.0248(18) 0.0151(17) 0.0160(16) -0.0021(13) -0.0024(14) -0.0104(14)
C21 0.028(2) 0.031(2) 0.0240(19) -0.0084(16) -0.0123(16) -0.0038(17)
C2 0.0149(17) 0.0275(19) 0.0274(19) -0.0138(16) 0.0022(14) -0.0076(15)
C3 0.0256(19) 0.0274(19) 0.0169(17) -0.0042(15) 0.0051(14) -0.0202(16)
C9 0.0197(18) 0.0143(17) 0.0264(19) -0.0069(15) -0.0048(14) -0.0013(14)
C19 0.032(2) 0.0164(17) 0.0145(16) -0.0044(14) 0.0003(14) -0.0152(15)
C14 0.0203(18) 0.0251(19) 0.0221(18) -0.0084(15) 0.0024(14) -0.0114(15)
C35 0.0243(18) 0.0150(16) 0.0140(16) -0.0049(13) -0.0078(14) -0.0054(14)
C20 0.038(2) 0.0249(19) 0.0156(17) -0.0052(15) -0.0099(15) -0.0136(17)
C13 0.0177(18) 0.030(2) 0.034(2) -0.0182(17) 0.0068(15) -0.0058(16)
C16 0.0185(17) 0.0125(15) 0.0126(15) -0.0017(13) -0.0036(13) -0.0098(13)
C12 0.0221(18) 0.0159(17) 0.030(2) -0.0109(15) -0.0006(15) -0.0027(15)
C23 0.0105(15) 0.0104(15) 0.0133(15) -0.0057(13) 0.0024(12) -0.0048(12)
C30 0.0166(16) 0.0125(15) 0.0109(15) -0.0030(12) -0.0030(12) -0.0076(13)

_geom_special_details            
;
 All esds (except the esd in the dihedral angle between two l.s. planes)
 are estimated using the full covariance matrix.  The cell esds are taken
 into account individually in the estimation of esds in distances, angles
 and torsion angles; correlations between esds in cell parameters are only
 used when they are defined by crystal symmetry.  An approximate (isotropic)
 treatment of cell esds is used for estimating esds involving l.s. planes.
;

loop_
_geom_bond_atom_site_label_1
_geom_bond_atom_site_label_2
_geom_bond_distance
_geom_bond_site_symmetry_2
_geom_bond_publ_flag
La1 O1 2.536(2) . ?
La1 O5 2.536(2) . ?
La1 O6 2.5734(19) . ?
La1 O4 2.585(2) . ?
La1 O3 2.6039(19) . ?
La1 N1 2.640(2) . ?
La1 O2 2.662(2) . ?
La1 N3 2.681(2) . ?
La1 N2 2.738(2) . ?
La1 O6 2.760(2) 2_566 ?
La1 C23 2.934(3) . ?
La1 C16 2.938(3) . ?
Cl3 C26 1.748(3) . ?
Cl5 C33 1.745(3) . ?
Cl6 C35 1.738(3) . ?
Cl1 C19 1.740(3) . ?
Cl4 C28 1.730(3) . ?
Cl2 C21 1.743(4) . ?
O6 C30 1.278(3) 2_566 ?
O6 La1 2.760(2) 2_566 ?
O4 C23 1.271(3) . ?
O3 C23 1.251(3) . ?
O2 C16 1.256(3) . ?
O1 C16 1.266(3) . ?
O5 C30 1.258(3) . ?
N2 C10 1.347(4) . ?
N2 C6 1.348(4) . ?
N1 C1 1.340(4) . ?
N1 C5 1.350(4) . ?
N3 C11 1.346(4) . ?
N3 C15 1.342(4) . ?
C36 C35 1.384(4) . ?
C36 C31 1.385(4) . ?
C24 C29 1.375(4) . ?
C24 C25 1.395(4) . ?
C24 C23 1.516(4) . ?
C5 C4 1.397(4) . ?
C5 C6 1.486(4) . ?
C32 C33 1.378(4) . ?
C32 C31 1.396(4) . ?
C10 C9 1.397(4) . ?
C10 C11 1.489(4) . ?
C29 C28 1.380(4) . ?
C25 C26 1.379(4) . ?
C17 C18 1.389(4) . ?
C17 C22 1.390(4) . ?
C17 C16 1.516(4) . ?
C31 C30 1.502(4) . ?
C26 C27 1.382(4) . ?
C27 C28 1.380(4) . ?
C33 C34 1.380(4) . ?
C34 C35 1.387(4) . ?
C6 C7 1.398(4) . ?
C1 C2 1.383(4) . ?
C15 C14 1.387(4) . ?
C11 C12 1.396(4) . ?
C22 C21 1.383(4) . ?
C4 C3 1.379(4) . ?
C8 C7 1.371(4) . ?
C8 C9 1.379(4) . ?
C18 C19 1.382(4) . ?
C21 C20 1.382(5) . ?
C2 C3 1.379(4) . ?
C19 C20 1.381(5) . ?
C14 C13 1.377(5) . ?
C13 C12 1.378(5) . ?
C30 O6 1.278(3) 2_566 ?

loop_
_geom_angle_atom_site_label_1
_geom_angle_atom_site_label_2
_geom_angle_atom_site_label_3
_geom_angle
_geom_angle_site_symmetry_1
_geom_angle_site_symmetry_3
_geom_angle_publ_flag
O1 La1 O5 75.25(6) . . ?
O1 La1 O6 145.52(6) . . ?
O5 La1 O6 116.22(6) . . ?
O1 La1 O4 132.38(6) . . ?
O5 La1 O4 121.50(6) . . ?
O6 La1 O4 71.78(6) . . ?
O1 La1 O3 138.40(6) . . ?
O5 La1 O3 74.58(6) . . ?
O6 La1 O3 74.71(6) . . ?
O4 La1 O3 50.71(6) . . ?
O1 La1 N1 79.79(7) . . ?
O5 La1 N1 143.95(7) . . ?
O6 La1 N1 73.21(7) . . ?
O4 La1 N1 94.54(7) . . ?
O3 La1 N1 138.79(7) . . ?
O1 La1 O2 50.46(6) . . ?
O5 La1 O2 72.16(6) . . ?
O6 La1 O2 99.93(6) . . ?
O4 La1 O2 165.94(6) . . ?
O3 La1 O2 139.38(6) . . ?
N1 La1 O2 71.91(7) . . ?
O1 La1 N3 71.01(7) . . ?
O5 La1 N3 76.27(7) . . ?
O6 La1 N3 141.68(7) . . ?
O4 La1 N3 71.20(7) . . ?
O3 La1 N3 74.51(7) . . ?
N1 La1 N3 119.26(7) . . ?
O2 La1 N3 118.31(7) . . ?
O1 La1 N2 70.96(7) . . ?
O5 La1 N2 131.46(7) . . ?
O6 La1 N2 111.40(7) . . ?
O4 La1 N2 65.67(7) . . ?
O3 La1 N2 110.61(7) . . ?
N1 La1 N2 60.01(7) . . ?
O2 La1 N2 108.75(7) . . ?
N3 La1 N2 60.44(7) . . ?
O1 La1 O6 110.27(6) . 2_566 ?
O5 La1 O6 49.33(6) . 2_566 ?
O6 La1 O6 67.64(7) . 2_566 ?
O4 La1 O6 113.16(6) . 2_566 ?
O3 La1 O6 68.49(6) . 2_566 ?
N1 La1 O6 120.04(7) . 2_566 ?
O2 La1 O6 72.29(6) . 2_566 ?
N3 La1 O6 119.76(7) . 2_566 ?
N2 La1 O6 178.77(7) . 2_566 ?
O1 La1 C23 143.99(7) . . ?
O5 La1 C23 98.73(7) . . ?
O6 La1 C23 69.32(7) . . ?
O4 La1 C23 25.65(7) . . ?
O3 La1 C23 25.22(7) . . ?
N1 La1 C23 116.59(7) . . ?
O2 La1 C23 161.70(7) . . ?
N3 La1 C23 73.07(7) . . ?
N2 La1 C23 89.24(7) . . ?
O6 La1 C23 89.69(7) 2_566 . ?
O1 La1 C16 25.40(7) . . ?
O5 La1 C16 69.29(7) . . ?
O6 La1 C16 124.41(8) . . ?
O4 La1 C16 156.74(7) . . ?
O3 La1 C16 143.75(7) . . ?
N1 La1 C16 76.96(8) . . ?
O2 La1 C16 25.32(7) . . ?
N3 La1 C16 93.86(8) . . ?
N2 La1 C16 91.60(8) . . ?
O6 La1 C16 89.59(7) 2_566 . ?
C23 La1 C16 164.41(8) . . ?
C30 O6 La1 156.06(18) 2_566 . ?
C30 O6 La1 88.73(16) 2_566 2_566 ?
La1 O6 La1 112.36(7) . 2_566 ?
C23 O4 La1 92.70(17) . . ?
C23 O3 La1 92.31(16) . . ?
C16 O2 La1 89.74(17) . . ?
C16 O1 La1 95.36(17) . . ?
C30 O5 La1 99.79(17) . . ?
C10 N2 C6 118.3(3) . . ?
C10 N2 La1 120.34(19) . . ?
C6 N2 La1 120.59(19) . . ?
C1 N1 C5 118.6(3) . . ?
C1 N1 La1 116.10(19) . . ?
C5 N1 La1 124.79(19) . . ?
C11 N3 C15 118.5(3) . . ?
C11 N3 La1 122.89(19) . . ?
C15 N3 La1 118.57(19) . . ?
C35 C36 C31 119.1(3) . . ?
C29 C24 C25 120.6(3) . . ?
C29 C24 C23 118.9(3) . . ?
C25 C24 C23 120.5(3) . . ?
N1 C5 C4 121.5(3) . . ?
N1 C5 C6 116.1(3) . . ?
C4 C5 C6 122.4(3) . . ?
C33 C32 C31 118.9(3) . . ?
N2 C10 C9 121.9(3) . . ?
N2 C10 C11 117.1(3) . . ?
C9 C10 C11 121.0(3) . . ?
C24 C29 C28 119.4(3) . . ?
C26 C25 C24 118.2(3) . . ?
C18 C17 C22 120.1(3) . . ?
C18 C17 C16 119.2(3) . . ?
C22 C17 C16 120.6(3) . . ?
C36 C31 C32 120.3(3) . . ?
C36 C31 C30 122.0(3) . . ?
C32 C31 C30 117.6(3) . . ?
C25 C26 C27 122.5(3) . . ?
C25 C26 Cl3 119.8(2) . . ?
C27 C26 Cl3 117.6(2) . . ?
C28 C27 C26 117.5(3) . . ?
C32 C33 C34 122.0(3) . . ?
C32 C33 Cl5 118.7(3) . . ?
C34 C33 Cl5 119.2(2) . . ?
C33 C34 C35 118.1(3) . . ?
N2 C6 C7 122.3(3) . . ?
N2 C6 C5 116.9(3) . . ?
C7 C6 C5 120.8(3) . . ?
N1 C1 C2 122.6(3) . . ?
N3 C15 C14 123.5(3) . . ?
N3 C11 C12 120.7(3) . . ?
N3 C11 C10 117.4(3) . . ?
C12 C11 C10 121.9(3) . . ?
C21 C22 C17 118.8(3) . . ?
C3 C4 C5 119.1(3) . . ?
C7 C8 C9 119.3(3) . . ?
C27 C28 C29 121.8(3) . . ?
C27 C28 Cl4 119.2(3) . . ?
C29 C28 Cl4 119.0(3) . . ?
C19 C18 C17 119.3(3) . . ?
C8 C7 C6 119.0(3) . . ?
C20 C21 C22 122.2(3) . . ?
C20 C21 Cl2 117.5(3) . . ?
C22 C21 Cl2 120.3(3) . . ?
C1 C2 C3 118.9(3) . . ?
C4 C3 C2 119.2(3) . . ?
C8 C9 C10 119.2(3) . . ?
C20 C19 C18 121.8(3) . . ?
C20 C19 Cl1 118.6(2) . . ?
C18 C19 Cl1 119.7(3) . . ?
C13 C14 C15 117.9(3) . . ?
C36 C35 C34 121.6(3) . . ?
C36 C35 Cl6 119.5(2) . . ?
C34 C35 Cl6 118.9(2) . . ?
C19 C20 C21 117.8(3) . . ?
C12 C13 C14 119.2(3) . . ?
O2 C16 O1 123.2(3) . . ?
O2 C16 C17 119.9(3) . . ?
O1 C16 C17 116.9(3) . . ?
O2 C16 La1 64.94(15) . . ?
O1 C16 La1 59.23(15) . . ?
C17 C16 La1 168.7(2) . . ?
C13 C12 C11 120.1(3) . . ?
O3 C23 O4 123.5(3) . . ?
O3 C23 C24 119.6(2) . . ?
O4 C23 C24 116.9(3) . . ?
O3 C23 La1 62.47(15) . . ?
O4 C23 La1 61.66(15) . . ?
C24 C23 La1 172.7(2) . . ?
O5 C30 O6 122.1(3) . 2_566 ?
O5 C30 C31 117.6(3) . . ?
O6 C30 C31 120.3(3) 2_566 . ?
O5 C30 La1 55.93(14) . . ?
O6 C30 La1 66.20(15) 2_566 . ?
C31 C30 La1 173.0(2) . . ?

_refine_diff_density_max         1.245
_refine_diff_density_min         -0.980
_refine_diff_density_rms         0.111

_shelxl_version_number           2013-4

_shelx_res_file                  
;
TITL Pbar1 in P-1
CELL  0.71073  12.3170  12.3233  14.1422   67.844   73.242   67.030
ZERR     1.00   0.0010   0.0010   0.0012    0.010    0.011    0.010
LATT   1
SFAC  C    H    N    O    CL   LA
UNIT  72   40   6    12   12   2
MERG   2
FMAP   2
PLAN   5
ISOR 0.001 Cl4
ACTA  51
L.S.  24
WGHT    0.021700    0.362100
FVAR       0.08185
LA1   6    0.099336    0.334010    0.447174    11.00000    0.01196    0.00869 =
         0.00913   -0.00289   -0.00111   -0.00482
CL3   5    0.506771    0.524460    0.660666    11.00000    0.02580    0.01913 =
         0.02943   -0.00444   -0.01192   -0.01166
CL5   5    0.344098    0.821614    0.000129    11.00000    0.02499    0.03301 =
         0.01782    0.00076    0.00218   -0.01750
CL6   5   -0.100228    1.069278    0.152764    11.00000    0.03586    0.01364 =
         0.01845   -0.00246   -0.00810   -0.00212
CL1   5    0.117275    0.269685   -0.078412    11.00000    0.04639    0.03367 =
         0.01826   -0.01526    0.00318   -0.01584
CL4   5    0.440298    0.094091    0.907348    11.00000    0.08723    0.05128 =
         0.05566    0.03650   -0.05862   -0.04875
CL2   5   -0.329077    0.541833    0.036579    11.00000    0.04181    0.09913 =
         0.04922   -0.04180   -0.03198    0.01800
O6    4   -0.019564    0.411451    0.604251    11.00000    0.01545    0.01332 =
         0.01061   -0.00508    0.00067   -0.00667
O4    4    0.230256    0.228982    0.590886    11.00000    0.01841    0.01289 =
         0.01565   -0.00319   -0.00379   -0.00721
O3    4    0.239562    0.415004    0.490704    11.00000    0.01767    0.01209 =
         0.01066   -0.00061   -0.00415   -0.00656
O2    4   -0.073554    0.418324    0.335463    11.00000    0.01798    0.01675 =
         0.01199   -0.00714   -0.00103   -0.00467
O1    4    0.088737    0.266330    0.302417    11.00000    0.02157    0.01217 =
         0.01535   -0.00542   -0.00641   -0.00232
O5    4    0.150061    0.495810    0.282284    11.00000    0.01863    0.01271 =
         0.01454   -0.00631    0.00010   -0.00466
N2    3    0.179456    0.081270    0.502092    11.00000    0.01625    0.00991 =
         0.01351   -0.00478   -0.00392   -0.00449
N1    3   -0.052876    0.208740    0.545402    11.00000    0.01535    0.01172 =
         0.01319   -0.00532   -0.00300   -0.00648
N3    3    0.321448    0.217227    0.367884    11.00000    0.01514    0.01533 =
         0.01477   -0.00735   -0.00164   -0.00636
C36   1    0.003262    0.823096    0.229921    11.00000    0.01861    0.01441 =
         0.01038   -0.00440   -0.00367   -0.00729
AFIX  43
H36   2   -0.066840    0.823832    0.277752    11.00000   -1.20000
AFIX   0
C24   1    0.331465    0.321658    0.642553    11.00000    0.00885    0.01371 =
         0.01358   -0.00713   -0.00179   -0.00251
C5    1   -0.021562    0.084984    0.588665    11.00000    0.02141    0.01287 =
         0.00924   -0.00350   -0.00554   -0.00853
C32   1    0.201561    0.712783    0.159997    11.00000    0.01858    0.01705 =
         0.01167   -0.00313   -0.00090   -0.00731
AFIX  43
H32   2    0.263822    0.639286    0.160423    11.00000   -1.20000
AFIX   0
C10   1    0.296187    0.020286    0.478215    11.00000    0.01863    0.01540 =
         0.01792   -0.00668   -0.00735   -0.00420
C29   1    0.349844    0.223380    0.731061    11.00000    0.02151    0.01496 =
         0.01893    0.00078   -0.00866   -0.00782
AFIX  43
H29   2    0.318010    0.160411    0.746309    11.00000   -1.20000
AFIX   0
C25   1    0.377940    0.417043    0.619773    11.00000    0.01062    0.01178 =
         0.01169   -0.00155   -0.00220   -0.00167
AFIX  43
H25   2    0.365521    0.483838    0.560128    11.00000   -1.20000
AFIX   0
C17   1   -0.042990    0.368325    0.179088    11.00000    0.02420    0.01132 =
         0.01115    0.00153   -0.00455   -0.01119
C31   1    0.096179    0.713548    0.231586    11.00000    0.01824    0.01250 =
         0.00994   -0.00539   -0.00343   -0.00742
C26   1    0.442783    0.409573    0.688103    11.00000    0.00966    0.01235 =
         0.01910   -0.00550   -0.00246   -0.00189
C27   1    0.463881    0.311273    0.777066    11.00000    0.01531    0.02347 =
         0.01880   -0.00333   -0.01016   -0.00567
AFIX  43
H27   2    0.508691    0.307435    0.821773    11.00000   -1.20000
AFIX   0
C33   1    0.211722    0.822769    0.088722    11.00000    0.02347    0.02216 =
         0.00955   -0.00318   -0.00212   -0.01256
C34   1    0.120591    0.933231    0.085289    11.00000    0.03220    0.01474 =
         0.01498    0.00052   -0.00696   -0.01293
AFIX  43
H34   2    0.129011    1.006740    0.036854    11.00000   -1.20000
AFIX   0
C6    1    0.107446    0.015422    0.566781    11.00000    0.01873    0.01328 =
         0.01166   -0.00585   -0.00403   -0.00699
C1    1   -0.167967    0.276152    0.563318    11.00000    0.01777    0.01270 =
         0.01990   -0.00907   -0.00383   -0.00207
AFIX  43
H1    2   -0.189747    0.361366    0.533161    11.00000   -1.20000
AFIX   0
C15   1    0.385616    0.284963    0.293434    11.00000    0.01522    0.01699 =
         0.02142   -0.00686   -0.00028   -0.00694
AFIX  43
H15   2    0.350488    0.370265    0.271504    11.00000   -1.20000
AFIX   0
C11   1    0.371633    0.093687    0.399720    11.00000    0.01361    0.01596 =
         0.01868   -0.00807   -0.00303   -0.00325
C22   1   -0.157859    0.439280    0.158450    11.00000    0.01926    0.03106 =
         0.01835   -0.01245   -0.00210   -0.00617
AFIX  43
H22   2   -0.215016    0.475491    0.206541    11.00000   -1.20000
AFIX   0
C4    1   -0.105966    0.026896    0.651642    11.00000    0.02244    0.01602 =
         0.01456   -0.00352   -0.00352   -0.00986
AFIX  43
H4    2   -0.083038   -0.058510    0.680640    11.00000   -1.20000
AFIX   0
C8    1    0.270189   -0.173032    0.589646    11.00000    0.03257    0.01012 =
         0.02435   -0.00373   -0.00812   -0.00275
AFIX  43
H8    2    0.300875   -0.257858    0.619581    11.00000   -1.20000
AFIX   0
C28   1    0.415988    0.219078    0.797056    11.00000    0.02649    0.02334 =
         0.02125    0.00753   -0.01308   -0.01126
C18   1    0.041523    0.314210    0.106926    11.00000    0.02473    0.01542 =
         0.01804   -0.00542   -0.00371   -0.00902
AFIX  43
H18   2    0.117946    0.265225    0.121132    11.00000   -1.20000
AFIX   0
C7    1    0.150508   -0.112386    0.611796    11.00000    0.02483    0.01507 =
         0.01602   -0.00206   -0.00236   -0.01045
AFIX  43
H7    2    0.098793   -0.155615    0.656079    11.00000   -1.20000
AFIX   0
C21   1   -0.185612    0.455055    0.065080    11.00000    0.02786    0.03090 =
         0.02400   -0.00837   -0.01230   -0.00383
C2    1   -0.255614    0.224109    0.624826    11.00000    0.01486    0.02750 =
         0.02739   -0.01385    0.00219   -0.00755
AFIX  43
H2    2   -0.334802    0.273433    0.635409    11.00000   -1.20000
AFIX   0
C3    1   -0.223719    0.097920    0.670211    11.00000    0.02555    0.02738 =
         0.01687   -0.00417    0.00507   -0.02023
AFIX  43
H3    2   -0.280966    0.061106    0.712869    11.00000   -1.20000
AFIX   0
C9    1    0.344579   -0.106951    0.522528    11.00000    0.01966    0.01433 =
         0.02642   -0.00692   -0.00485   -0.00126
AFIX  43
H9    2    0.426021   -0.146632    0.506943    11.00000   -1.20000
AFIX   0
C19   1    0.010908    0.333888    0.013796    11.00000    0.03200    0.01641 =
         0.01446   -0.00444    0.00026   -0.01523
C14   1    0.501481    0.234523    0.247488    11.00000    0.02025    0.02511 =
         0.02209   -0.00839    0.00243   -0.01144
AFIX  43
H14   2    0.542921    0.284422    0.195687    11.00000   -1.20000
AFIX   0
C35   1    0.016111    0.931453    0.156140    11.00000    0.02426    0.01497 =
         0.01403   -0.00485   -0.00780   -0.00538
C20   1   -0.102338    0.404563   -0.009016    11.00000    0.03836    0.02486 =
         0.01555   -0.00518   -0.00994   -0.01364
AFIX  43
H20   2   -0.121916    0.417744   -0.072110    11.00000   -1.20000
AFIX   0
C13   1    0.553276    0.108251    0.280945    11.00000    0.01768    0.03030 =
         0.03377   -0.01818    0.00679   -0.00581
AFIX  43
H13   2    0.630949    0.071112    0.252130    11.00000   -1.20000
AFIX   0
C16   1   -0.007814    0.350666    0.279494    11.00000    0.01847    0.01252 =
         0.01257   -0.00165   -0.00364   -0.00980
C12   1    0.488666    0.037563    0.357625    11.00000    0.02215    0.01594 =
         0.03048   -0.01087   -0.00056   -0.00274
AFIX  43
H12   2    0.523107   -0.047701    0.381373    11.00000   -1.20000
AFIX   0
C23   1    0.261579    0.323627    0.569168    11.00000    0.01048    0.01037 =
         0.01325   -0.00571    0.00236   -0.00485
C30   1    0.087504    0.592137    0.307892    11.00000    0.01664    0.01248 =
         0.01086   -0.00298   -0.00296   -0.00755
HKLF    4

REM  Pbar1 in P-1
REM R1 =  0.0332 for    6560 Fo > 4sig(Fo)  and  0.0468 for all    7916 data
REM    469 parameters refined using      6 restraints

END

WGHT      0.0198      0.5160

REM Highest difference peak  1.245,  deepest hole -0.980,  1-sigma level  0.111
Q1    1   0.4990  0.0645  0.8841  11.00000  0.05    1.25
Q2    1   0.4147  0.1178  0.9329  11.00000  0.05    0.71
Q3    1   0.1798  0.3408  0.3997  11.00000  0.05    0.49
Q4    1  -0.0435  0.3550  0.2337  11.00000  0.05    0.48
Q5    1   0.0916  0.6656  0.2810  11.00000  0.05    0.47
;
_shelx_res_checksum              82854

_shelx_hkl_file                  
;
  -1   0   0  168.70    2.63
  -1   0   0  168.89    2.72
   1   0   0  163.24    2.70
   1   0   0  167.22    2.59
  -2   0   0   61.76    1.23
  -2   0   0   60.14    1.35
   2   0   0   61.35    1.36
   2   0   0   62.80    1.20
  -3   0   0    6.84    0.58
  -3   0   0    5.90    0.44
   3   0   0    6.96    0.61
   3   0   0    5.99    0.41
  -4   0   0   65.94    1.79
  -4   0   0   63.59    1.53
   4   0   0   63.91    1.75
   4   0   0   65.12    1.49
  -5   0   0  140.88    3.18
  -5   0   0  142.91    2.86
   5   0   0  142.91    2.76
   5   0   0  136.69    3.15
  -6   0   0    4.91    0.74
  -6   0   0    5.22    0.58
   6   0   0    3.71    0.65
   6   0   0    5.70    0.55
  -7   0   0   22.92    1.06
  -7   0   0   20.81    1.28
   7   0   0   21.55    0.98
   7   0   0   22.88    1.31
  -8   0   0   18.01    1.29
  -8   0   0   14.91    0.94
   8   0   0   14.63    1.18
   8   0   0   14.61    0.86
  -9   0   0   55.99    1.88
  -9   0   0   51.25    2.24
   9   0   0   52.34    1.74
   9   0   0   57.17    2.35
 -10   0   0   26.85    1.77
 -10   0   0   26.82    1.38
  10   0   0   25.02    1.24
  10   0   0   26.58    1.76
 -11   0   0   18.30    1.87
  11   0   0   14.56    1.67
 -12   0   0   13.84    1.73
  12   0   0   16.57    1.86
 -13   0   0    5.02    1.20
  13   0   0    4.93    1.24
 -14   0   0    5.24    1.32
  14   0   0    8.35    1.52
  13  -1   0    4.58    1.19
 -13   1   0    6.13    1.42
  12  -1   0    0.22    0.80
 -12   1   0   -0.25    0.70
  11  -1   0    2.72    0.90
 -11   1   0    4.98    1.18
  10  -1   0    1.74    0.56
  10  -1   0    1.09    0.75
 -10   1   0    1.78    0.85
   9  -1   0    4.78    0.90
   9  -1   0    5.76    0.76
  -9   1   0    6.17    1.04
  -9   1   0    4.97    0.65
   8  -1   0   26.89    1.56
   8  -1   0   26.72    1.26
  -8   1   0   25.35    1.13
  -8   1   0   25.23    1.56
   7  -1   0   13.11    0.87
   7  -1   0   15.41    1.14
  -7   1   0   14.58    0.81
  -7   1   0   13.26    1.24
   6  -1   0   26.58    1.09
   6  -1   0   23.64    1.25
  -6   1   0   24.47    1.32
  -6   1   0   23.20    0.94
   5  -1   0    9.52    0.85
   5  -1   0    9.55    0.67
  -5   1   0   10.89    0.61
  -5   1   0   10.65    0.98
   4  -1   0    4.06    0.55
   4  -1   0    4.98    0.53
  -4   1   0    5.18    0.42
  -4   1   0    7.66    0.77
   3  -1   0   74.02    1.83
   3  -1   0   75.53    1.72
  -3   1   0   78.60    1.93
  -3   1   0   78.62    1.51
   2  -1   0    0.48    0.30
   2  -1   0    0.60    0.25
  -2   1   0    1.16    0.18
  -2   1   0    1.22    0.36
   1  -1   0    0.69    0.22
   1  -1   0    0.39    0.18
  -1   1   0    0.47    0.23
   0  -1   0   19.68    0.50
   0  -1   0   19.55    0.42
   0  -1   0   19.09    0.48
   0   1   0   18.25    0.47
  -1  -1   0   72.83    1.27
  -1  -1   0   72.92    1.37
  -1  -1   0   72.59    1.24
   1   1   0   75.26    1.25
   1   1   0   73.84    1.28
  -2  -1   0    6.64    0.29
  -2  -1   0    6.05    0.42
  -2  -1   0    6.41    0.44
   2   1   0    6.14    0.42
   2   1   0    6.64    0.28
  -3  -1   0   49.59    1.29
  -3  -1   0   49.83    1.28
   3   1   0   50.84    1.36
   3   1   0   51.86    1.04
  -4  -1   0    2.89    0.44
  -4  -1   0    2.19    0.46
   4   1   0    3.12    0.32
   4   1   0    3.76    0.50
  -5  -1   0   10.28    0.78
  -5  -1   0    8.54    0.66
   5   1   0    9.88    0.52
   5   1   0    9.69    0.85
  -6  -1   0   25.73    1.24
  -6  -1   0   28.48    1.17
   6   1   0   29.26    1.35
   6   1   0   28.23    0.94
  -7  -1   0   75.86    2.34
  -7  -1   0   76.90    2.15
   7   1   0   78.67    1.85
   7   1   0   74.20    2.35
  -8  -1   0   13.19    0.94
  -8  -1   0   13.17    1.20
   8   1   0   14.39    0.79
   8   1   0   14.26    1.15
  -9  -1   0    9.52    1.13
  -9  -1   0   10.17    0.99
   9   1   0    9.22    1.14
   9   1   0    8.29    0.68
 -10  -1   0    6.00    1.03
 -10  -1   0    5.66    0.82
  10   1   0    3.94    0.90
 -11  -1   0    6.71    0.94
 -11  -1   0    9.90    1.35
  11   1   0    9.38    1.36
 -12  -1   0   14.48    1.67
  12   1   0   14.65    1.69
 -13  -1   0   12.33    1.66
  13   1   0   10.35    1.53
 -14  -1   0    0.40    0.88
  14   1   0    0.45    0.90
  13  -2   0    4.45    1.19
 -13   2   0    3.16    1.20
  12  -2   0   10.21    1.50
 -12   2   0   13.33    1.78
  11  -2   0   12.32    1.54
 -11   2   0   12.04    1.66
  10  -2   0    2.13    0.81
  10  -2   0    3.82    0.76
 -10   2   0    3.51    1.00
   9  -2   0    5.17    0.81
   9  -2   0    5.65    0.98
  -9   2   0    4.44    0.96
   8  -2   0   31.75    1.70
   8  -2   0   30.96    1.44
  -8   2   0   31.62    1.18
  -8   2   0   30.97    1.79
   7  -2   0   40.37    1.77
   7  -2   0   38.96    1.54
  -7   2   0   37.96    1.82
  -7   2   0   36.97    1.20
   6  -2   0   62.91    1.92
   6  -2   0   61.30    2.09
  -6   2   0   62.17    1.52
  -6   2   0   60.44    2.15
   5  -2   0    3.00    0.59
   5  -2   0    2.70    0.49
  -5   2   0    2.40    0.55
  -5   2   0    2.52    0.33
   4  -2   0   12.67    0.86
   4  -2   0   12.46    0.79
  -4   2   0   12.65    0.50
  -4   2   0   13.26    0.94
   3  -2   0   61.57    1.66
   3  -2   0   61.37    1.69
  -3   2   0   60.51    1.77
  -3   2   0   63.48    1.17
   2  -2   0    3.14    0.21
   2  -2   0    2.82    0.43
   2  -2   0    2.34    0.42
  -2   2   0    3.89    0.53
   1  -2   0  198.77    3.53
   1  -2   0  200.12    3.49
  -1   2   0  199.17    3.06
  -1   2   0  193.95    3.53
  -1   2   0  203.01    3.07
   0  -2   0   15.82    0.64
   0  -2   0   17.34    0.51
   0  -2   0   16.15    0.60
   0   2   0   16.88    0.60
  -1  -2   0   32.17    0.78
  -1  -2   0   33.20    0.89
  -1  -2   0   32.13    0.86
  -1  -2   0   31.92    0.83
  -2  -2   0   34.71    0.86
  -2  -2   0   35.72    1.03
   2   2   0   35.33    0.98
   2   2   0   35.32    0.83
   2   2   0   35.46    1.00
  -3  -2   0    2.09    0.36
  -3  -2   0    2.20    0.42
   3   2   0    2.47    0.43
   3   2   0    2.16    0.24
  -4  -2   0   97.87    2.15
  -4  -2   0   95.96    2.24
   4   2   0   97.90    1.78
   4   2   0   94.70    2.26
  -5  -2   0    0.24    0.34
  -5  -2   0   -0.34    0.28
   5   2   0    0.09    0.17
   5   2   0    0.74    0.36
  -6  -2   0    0.58    0.39
  -6  -2   0    1.52    0.45
   6   2   0    1.16    0.49
   6   2   0    1.23    0.26
  -7  -2   0   16.21    1.03
  -7  -2   0   17.51    1.08
   7   2   0   17.72    0.73
   7   2   0   18.43    1.18
  -8  -2   0   53.46    1.98
  -8  -2   0   55.42    1.94
   8   2   0   56.30    1.49
   8   2   0   53.18    2.09
  -9  -2   0   11.02    1.13
  -9  -2   0   11.93    1.14
   9   2   0    8.82    1.06
   9   2   0    9.81    0.67
 -10  -2   0    0.62    0.60
 -10  -2   0    0.47    0.48
  10   2   0    0.24    0.58
 -11  -2   0   -0.19    0.59
 -11  -2   0   -0.26    0.49
  11   2   0    0.71    0.71
 -12  -2   0   12.33    1.32
 -12  -2   0   11.42    1.43
  12   2   0    9.99    1.47
 -13  -2   0   13.57    1.54
 -13  -2   0   15.81    1.76
  13   2   0   16.71    1.87
 -14  -2   0    7.74    1.39
  14   2   0    8.92    1.58
  13  -3   0    0.22    0.76
 -13   3   0    0.95    0.97
  12  -3   0    0.84    0.88
 -12   3   0    1.64    1.03
  11  -3   0   12.27    1.59
 -11   3   0   12.97    1.76
  10  -3   0   15.09    1.61
  10  -3   0   16.01    1.28
 -10   3   0   13.74    1.60
   9  -3   0   14.57    1.49
   9  -3   0   12.01    1.20
  -9   3   0   15.79    1.67
   8  -3   0    7.06    1.06
   8  -3   0    5.13    0.81
  -8   3   0    5.44    1.02
   7  -3   0    5.04    0.78
   7  -3   0    5.48    0.86
  -7   3   0    5.98    0.93
   6  -3   0   46.26    1.86
   6  -3   0   46.28    1.76
  -6   3   0   52.26    2.08
  -6   3   0   47.92    1.17
   5  -3   0   40.00    1.62
   5  -3   0   45.12    1.63
  -5   3   0   39.43    1.71
  -5   3   0   41.88    0.97
   4  -3   0   86.39    2.29
   4  -3   0   82.52    2.30
  -4   3   0   87.68    1.52
  -4   3   0   85.65    2.43
   3  -3   0   62.97    1.80
   3  -3   0   60.63    1.79
  -3   3   0   62.22    1.90
   2  -3   0   11.18    0.76
   2  -3   0   10.77    0.72
  -2   3   0    9.54    0.76
   1  -3   0   93.12    2.15
   1  -3   0   90.83    2.06
  -1   3   0   96.19    1.65
  -1   3   0   95.96    2.14
   0  -3   0   30.90    1.05
   0  -3   0   30.81    0.82
   0  -3   0   29.11    0.97
   0   3   0   31.57    1.00
  -1  -3   0  294.90    4.96
  -1  -3   0  301.85    5.02
  -1  -3   0  306.82    5.07
  -1  -3   0  306.90    5.14
  -2  -3   0  275.54    4.85
  -2  -3   0  284.56    4.89
  -2  -3   0  281.23    4.64
   2   3   0  284.51    4.68
  -3  -3   0   16.89    0.69
  -3  -3   0   16.50    0.85
   3   3   0   16.91    0.84
   3   3   0   17.35    0.63
   3   3   0   16.95    0.82
  -4  -3   0    0.46    0.34
  -4  -3   0    0.58    0.29
   4   3   0    0.44    0.20
   4   3   0    0.58    0.34
  -5  -3   0   74.99    2.07
  -5  -3   0   72.44    1.85
   5   3   0   69.92    2.03
   5   3   0   72.59    1.50
  -6  -3   0  100.62    2.63
  -6  -3   0  100.76    2.47
   6   3   0   99.21    2.66
   6   3   0  102.30    1.98
  -7  -3   0    5.83    0.77
  -7  -3   0    7.75    0.82
   7   3   0    6.28    0.80
   7   3   0    6.72    0.45
  -8  -3   0    1.80    0.54
  -8  -3   0    1.94    0.56
   8   3   0    1.82    0.32
   8   3   0    1.29    0.56
  -9  -3   0   18.51    1.25
  -9  -3   0   21.65    1.32
   9   3   0   20.44    1.41
   9   3   0   18.49    0.80
 -10  -3   0   73.10    2.56
 -10  -3   0   75.11    2.62
  10   3   0   69.99    2.73
 -11  -3   0   45.83    2.15
 -11  -3   0   44.46    2.10
  11   3   0   46.05    2.32
 -12  -3   0   -0.48    0.43
 -12  -3   0    0.49    0.63
  12   3   0    0.61    0.75
 -13  -3   0    0.86    0.75
 -13  -3   0    0.56    0.66
  13   3   0    0.12    0.77
 -14  -3   0   14.31    1.61
 -14  -3   0   16.11    1.83
  14   3   0   13.32    1.79
  12  -4   0    6.55    1.34
 -12   4   0    5.38    1.30
  11  -4   0    3.69    1.02
 -11   4   0    3.60    1.22
  10  -4   0    5.06    0.91
  10  -4   0    3.14    0.94
 -10   4   0    4.70    1.13
   9  -4   0   13.49    1.34
   9  -4   0   15.81    1.57
  -9   4   0   12.73    1.49
   8  -4   0    4.54    0.80
   8  -4   0    4.85    0.97
  -8   4   0    4.41    0.99
   7  -4   0   11.78    1.21
   7  -4   0   11.46    1.21
  -7   4   0    9.26    1.25
   6  -4   0    3.24    0.71
   6  -4   0    2.69    0.65
  -6   4   0    2.63    0.73
   5  -4   0    0.56    0.41
   5  -4   0    0.13    0.36
  -5   4   0   -0.08    0.45
   4  -4   0   18.10    1.10
   4  -4   0   17.62    1.09
  -4   4   0   18.41    1.19
   3  -4   0    8.36    0.80
   3  -4   0   10.24    0.92
  -3   4   0   11.94    1.06
   2  -4   0    8.18    0.81
   2  -4   0    9.76    0.85
  -2   4   0    9.73    0.76
   1  -4   0    0.41    0.34
   1  -4   0    0.38    0.33
  -1   4   0    0.63    0.36
   0  -4   0    1.31    0.37
   0  -4   0    1.29    0.30
   0  -4   0    0.82    0.38
   0   4   0    1.17    0.37
  -1  -4   0   84.78    1.92
  -1  -4   0   88.29    2.06
  -1  -4   0   86.12    1.90
  -1  -4   0   85.40    2.04
  -2  -4   0   87.51    2.11
  -2  -4   0   87.71    2.01
  -2  -4   0   89.52    2.08
  -2  -4   0   92.11    1.93
  -3  -4   0  132.40    2.90
  -3  -4   0  138.65    2.65
  -3  -4   0  137.07    2.95
   3   4   0  136.51    2.66
  -4  -4   0   10.44    0.80
  -4  -4   0   10.87    0.63
   4   4   0    9.60    0.78
   4   4   0   10.60    0.58
   4   4   0    9.82    0.76
  -5  -4   0   14.52    0.96
  -5  -4   0   15.13    0.80
   5   4   0   16.69    1.00
   5   4   0   16.87    0.66
  -6  -4   0   36.53    1.32
  -6  -4   0   37.05    1.52
   6   4   0   36.38    1.55
   6   4   0   38.51    1.04
  -7  -4   0    2.48    0.52
  -7  -4   0    2.79    0.64
   7   4   0    2.85    0.60
   7   4   0    3.77    0.40
  -8  -4   0   21.99    1.33
  -8  -4   0   22.55    1.23
   8   4   0   22.15    1.37
   8   4   0   23.09    0.82
  -9  -4   0    3.58    0.72
  -9  -4   0    2.36    0.67
   9   4   0    3.71    0.83
 -10  -4   0    2.85    0.76
 -10  -4   0    5.18    0.90
  10   4   0    3.11    0.84
 -11  -4   0   24.76    1.59
 -11  -4   0   23.24    1.64
  11   4   0   21.94    1.69
 -12  -4   0   11.16    1.37
 -12  -4   0   14.67    1.53
  12   4   0   14.91    1.72
 -13  -4   0   12.80    1.53
 -13  -4   0    9.01    1.32
  13   4   0    9.56    1.51
 -14  -4   0    0.06    0.68
 -14  -4   0   -0.53    0.65
  14   4   0    0.28    0.87
 -15  -4   0    0.58    0.79
 -15  -4   0    0.27    0.72
  15   4   0    0.47    0.95
  11  -5   0   10.52    1.57
  11  -5   0   10.98    1.38
 -11   5   0   10.21    1.75
  10  -5   0    2.45    0.79
  10  -5   0    1.30    0.80
 -10   5   0    2.56    1.02
   9  -5   0    1.80    0.71
   9  -5   0    1.28    0.74
  -9   5   0    2.28    0.95
   8  -5   0    0.26    0.66
   8  -5   0    1.50    0.67
  -8   5   0    1.87    0.87
   7  -5   0   20.10    1.43
   7  -5   0   19.00    1.37
  -7   5   0   16.95    1.67
   6  -5   0    7.83    0.98
   6  -5   0    7.66    1.02
  -6   5   0    7.70    1.11
   5  -5   0    2.20    0.63
   5  -5   0    2.33    0.62
  -5   5   0    3.76    0.76
   4  -5   0    0.97    0.48
   4  -5   0    0.56    0.45
  -4   5   0    0.11    0.45
   3  -5   0    0.21    0.39
   3  -5   0   -0.03    0.36
  -3   5   0   -0.17    0.36
   2  -5   0  141.45    3.26
   2  -5   0  141.71    3.38
  -2   5   0  138.63    3.35
  -2   5   0  148.67    2.41
   1  -5   0    3.11    0.54
   1  -5   0    3.94    0.65
  -1   5   0    4.05    0.36
  -1   5   0    4.08    0.62
   0  -5   0   36.73    1.33
   0  -5   0   36.76    1.07
   0  -5   0   34.65    1.37
   0   5   0   36.57    1.31
  -1  -5   0    0.55    0.31
  -1  -5   0    0.28    0.35
  -1  -5   0   -0.06    0.34
   1   5   0    0.80    0.32
  -2  -5   0   47.93    1.36
  -2  -5   0   46.96    1.46
  -2  -5   0   46.07    1.52
  -2  -5   0   47.26    1.49
  -3  -5   0  166.57    3.59
  -3  -5   0  168.64    3.55
  -3  -5   0  174.45    3.28
   3   5   0  172.04    3.39
  -4  -5   0   64.86    1.66
  -4  -5   0   64.86    1.96
   4   5   0   63.16    1.64
  -5  -5   0   17.60    1.08
  -5  -5   0   17.11    0.84
   5   5   0   16.77    1.03
   5   5   0   20.38    1.07
   5   5   0   18.40    0.80
  -6  -5   0    7.07    0.68
  -6  -5   0    4.65    0.72
   6   5   0    6.35    0.49
   6   5   0    5.25    0.74
  -7  -5   0   36.68    1.64
  -7  -5   0   37.67    1.44
   7   5   0   36.64    1.69
   7   5   0   37.84    1.12
  -8  -5   0   13.23    1.30
  -8  -5   0   14.43    1.00
   8   5   0   11.22    1.16
   8   5   0   13.94    0.66
  -9  -5   0   25.84    1.56
  -9  -5   0   25.83    1.39
   9   5   0   27.42    1.63
 -10  -5   0   16.76    1.25
 -10  -5   0   17.00    1.57
  10   5   0   18.74    1.71
 -11  -5   0   -0.24    0.50
 -11  -5   0    0.29    0.47
  11   5   0    0.27    0.63
 -12  -5   0   17.42    1.74
 -12  -5   0   15.12    1.50
  12   5   0   19.51    1.95
 -13  -5   0   15.40    1.69
 -13  -5   0   18.35    1.74
  13   5   0   23.24    2.28
 -14  -5   0   19.00    1.79
 -14  -5   0   15.59    1.81
  14   5   0   16.16    1.94
 -15  -5   0    1.00    0.92
  15   5   0    0.68    1.06
  11  -6   0    1.27    0.87
  11  -6   0    2.52    0.90
 -11   6   0    0.50    0.92
  10  -6   0    4.54    1.07
  10  -6   0    6.75    1.28
 -10   6   0    5.88    1.30
   9  -6   0    1.35    0.78
   9  -6   0    0.71    0.67
  -9   6   0    2.37    1.00
   8  -6   0    2.56    0.79
   8  -6   0    4.61    0.97
  -8   6   0    1.93    0.85
   7  -6   0    0.94    0.70
   7  -6   0    0.20    0.56
  -7   6   0    0.41    0.69
   6  -6   0   -0.25    0.49
   6  -6   0    0.25    0.54
  -6   6   0    1.12    0.72
   5  -6   0   31.59    1.67
   5  -6   0   27.37    1.63
  -5   6   0   32.14    1.82
   4  -6   0   22.54    1.36
   4  -6   0   20.79    1.37
  -4   6   0   21.50    1.43
   3  -6   0    5.02    0.80
   3  -6   0    6.73    0.88
  -3   6   0    6.52    0.89
   2  -6   0    0.34    0.45
   2  -6   0   -0.01    0.41
  -2   6   0    0.12    0.17
  -2   6   0   -0.06    0.38
   1  -6   0    3.73    0.64
   1  -6   0    2.81    0.61
  -1   6   0    2.52    0.34
  -1   6   0    1.93    0.53
   0  -6   0    0.39    0.28
   0  -6   0    0.79    0.41
   0  -6   0    0.67    0.43
   0   6   0    0.05    0.34
  -1  -6   0    9.62    0.70
  -1  -6   0   10.27    0.94
  -1  -6   0   10.98    0.87
   1   6   0    9.82    0.74
  -2  -6   0    1.56    0.48
  -2  -6   0    1.34    0.42
  -2  -6   0    1.27    0.39
  -2  -6   0    1.63    0.45
  -3  -6   0   24.23    0.99
  -3  -6   0   21.45    1.09
  -3  -6   0   23.48    1.19
   3   6   0   23.08    1.10
  -4  -6   0    5.52    0.74
  -4  -6   0    4.96    0.55
  -4  -6   0    4.25    0.66
   4   6   0    4.98    0.60
  -5  -6   0   26.99    1.09
  -5  -6   0   24.41    1.30
   5   6   0   26.21    1.31
   5   6   0   27.17    1.36
   5   6   0   27.10    1.06
  -6  -6   0    0.35    0.30
  -6  -6   0    0.11    0.36
   6   6   0    1.10    0.48
   6   6   0   -0.34    0.36
   6   6   0   -0.10    0.23
  -7  -6   0    8.17    0.80
  -7  -6   0    7.05    0.89
   7   6   0    9.41    0.64
   7   6   0   11.16    1.16
  -8  -6   0    1.49    0.57
  -8  -6   0    2.45    0.53
   8   6   0    1.62    0.61
   8   6   0    2.21    0.38
  -9  -6   0   14.19    1.07
  -9  -6   0   16.42    1.54
   9   6   0   13.70    1.39
 -10  -6   0   17.31    1.65
 -10  -6   0   16.90    1.22
  10   6   0   19.08    1.52
 -11  -6   0   11.07    1.27
 -11  -6   0   12.68    1.53
  11   6   0   13.04    1.57
 -12  -6   0    6.55    1.19
 -12  -6   0    8.46    1.13
  12   6   0    7.50    1.29
 -13  -6   0    3.12    0.87
 -13  -6   0    2.64    0.91
  13   6   0    2.67    1.06
 -14  -6   0    7.00    1.33
  14   6   0    8.68    1.62
 -15  -6   0    2.53    1.07
  15   6   0    4.91    1.41
  10  -7   0    4.34    1.11
  10  -7   0    2.35    0.94
 -10   7   0    1.72    1.05
   9  -7   0    5.11    1.16
   9  -7   0    5.99    1.20
  -9   7   0    4.42    1.29
   8  -7   0   13.41    1.53
   8  -7   0   15.33    1.66
  -8   7   0   13.25    1.71
   7  -7   0    1.07    0.74
   7  -7   0   -0.53    0.54
  -7   7   0    0.08    0.70
   6  -7   0    2.80    0.83
   6  -7   0    5.51    0.98
  -6   7   0    3.50    0.94
   5  -7   0   11.50    1.29
   5  -7   0    8.69    1.13
  -5   7   0   11.09    1.38
   4  -7   0   17.60    1.59
   4  -7   0   18.01    1.35
  -4   7   0   19.03    1.47
   3  -7   0   19.93    1.36
   3  -7   0   19.07    1.28
  -3   7   0   16.37    1.28
   2  -7   0    4.02    0.77
   2  -7   0    4.42    0.76
  -2   7   0    4.66    0.83
   1  -7   0   -0.11    0.34
   1  -7   0   -0.33    0.36
  -1   7   0    0.12    0.37
  -1   7   0   -0.07    0.22
   0  -7   0   19.94    1.20
   0  -7   0   21.29    1.28
   0  -7   0   20.72    0.91
   0   7   0   21.83    1.18
  -1  -7   0   11.00    1.03
  -1  -7   0   12.03    0.95
  -1  -7   0   11.31    0.77
   1   7   0   10.30    0.83
  -2  -7   0   64.06    2.07
  -2  -7   0   61.12    1.87
  -2  -7   0   60.23    2.03
   2   7   0   63.77    1.89
  -3  -7   0   17.69    1.07
  -3  -7   0   14.39    0.88
  -3  -7   0   17.03    1.11
   3   7   0   16.58    1.06
  -4  -7   0   25.20    1.34
  -4  -7   0   26.52    1.11
  -4  -7   0   25.43    1.30
   4   7   0   25.71    1.21
  -5  -7   0    0.69    0.36
  -5  -7   0    0.97    0.50
   5   7   0    0.91    0.36
  -6  -7   0   11.11    1.13
  -6  -7   0   12.29    0.85
   6   7   0   11.85    0.79
   6   7   0   13.66    1.22
   6   7   0   12.67    1.23
  -7  -7   0   11.30    1.21
  -7  -7   0    9.51    0.86
   7   7   0    8.89    0.69
   7   7   0    8.60    1.01
  -8  -7   0    1.74    0.67
  -8  -7   0    2.27    0.54
   8   7   0    3.18    0.79
   8   7   0    2.72    0.46
  -9  -7   0   -0.47    0.36
  -9  -7   0    0.19    0.56
   9   7   0   -0.03    0.46
 -10  -7   0   -0.13    0.58
 -10  -7   0    1.14    0.54
  10   7   0    1.05    0.73
 -11  -7   0   12.93    1.54
 -11  -7   0   11.81    1.20
  11   7   0   14.88    1.72
 -12  -7   0   12.87    1.62
  12   7   0    9.79    1.51
 -13  -7   0    7.68    1.38
  13   7   0    9.75    1.61
 -14  -7   0    1.23    0.87
  14   7   0    1.27    1.03
   9  -8   0   -0.44    0.68
   9  -8   0   -0.71    0.68
  -9   8   0    0.54    0.93
   8  -8   0    9.08    1.40
   8  -8   0    9.42    1.42
  -8   8   0   11.72    1.71
   7  -8   0    6.87    1.25
   7  -8   0    9.82    1.38
  -7   8   0    6.70    1.25
   6  -8   0    9.16    1.31
   6  -8   0    6.63    1.16
  -6   8   0    4.29    1.11
   5  -8   0    7.33    1.18
   5  -8   0    6.39    1.05
  -5   8   0    6.41    1.13
   4  -8   0    0.47    0.56
   4  -8   0    0.90    0.62
  -4   8   0    0.55    0.65
   3  -8   0   25.61    1.65
   3  -8   0   26.17    1.57
  -3   8   0   22.08    1.57
   2  -8   0    8.09    1.09
   2  -8   0    9.69    1.10
  -2   8   0   10.81    1.21
   1  -8   0   45.98    2.03
   1  -8   0   41.98    1.87
  -1   8   0   44.39    1.92
   0  -8   0   31.22    1.17
   0  -8   0   28.63    1.57
   0  -8   0   31.79    1.55
   0   8   0   30.32    1.51
  -1  -8   0    0.27    0.46
  -1  -8   0    1.12    0.40
  -1  -8   0    1.41    0.54
   1   8   0    0.37    0.39
  -2  -8   0    4.03    0.65
  -2  -8   0    3.96    0.74
  -2  -8   0    4.31    0.78
   2   8   0    3.88    0.62
  -3  -8   0   10.53    0.94
  -3  -8   0   10.73    1.02
  -3  -8   0    9.46    1.02
   3   8   0    9.25    1.00
  -4  -8   0   19.19    1.05
  -4  -8   0   20.30    1.29
  -4  -8   0   20.58    1.25
   4   8   0   21.16    1.20
  -5  -8   0    2.64    0.53
  -5  -8   0    2.89    0.66
  -5  -8   0    2.64    0.67
   5   8   0    3.39    0.60
  -6  -8   0    0.63    0.51
  -6  -8   0    0.31    0.35
   6   8   0    0.69    0.37
   6   8   0    0.41    0.49
   6   8   0   -0.12    0.43
  -7  -8   0    0.34    0.51
  -7  -8   0    0.68    0.37
   7   8   0   -0.87    0.39
   7   8   0   -0.21    0.30
   7   8   0    0.86    0.53
  -8  -8   0   31.70    1.82
  -8  -8   0   30.96    1.41
   8   8   0   29.91    1.78
  -9  -8   0   42.48    1.75
  -9  -8   0   43.11    2.20
   9   8   0   39.24    2.08
 -10  -8   0    3.42    0.94
  10   8   0    3.37    0.92
 -11  -8   0    4.70    1.10
  11   8   0    5.74    1.20
 -12  -8   0   10.02    1.55
  12   8   0    6.46    1.24
 -13  -8   0   24.43    2.29
  13   8   0   23.24    2.22
 -14  -8   0    9.46    1.59
  14   8   0   13.38    1.92
   8  -9   0   -0.65    0.74
   8  -9   0    2.00    0.87
  -8   9   0    1.62    1.00
   7  -9   0    1.24    0.78
   7  -9   0    2.83    1.03
  -7   9   0    2.07    1.02
   6  -9   0   10.09    1.50
   6  -9   0    8.21    1.28
  -6   9   0   11.00    1.57
   5  -9   0    8.31    1.28
   5  -9   0    6.23    1.11
  -5   9   0    6.62    1.27
   4  -9   0    0.08    0.66
   4  -9   0   -0.43    0.54
  -4   9   0    1.10    0.74
   3  -9   0    1.27    0.72
   3  -9   0    2.49    0.80
  -3   9   0    4.91    1.01
   2  -9   0    8.51    1.21
   2  -9   0    8.69    1.13
  -2   9   0    8.95    1.18
   1  -9   0    7.91    1.07
   1  -9   0    7.19    1.08
  -1   9   0    6.86    1.03
   0  -9   0   13.14    1.33
   0  -9   0   15.19    1.36
   0   9   0   16.33    1.22
  -1  -9   0    0.29    0.38
  -1  -9   0    0.10    0.47
  -1  -9   0   -0.16    0.46
   1   9   0    0.36    0.45
  -2  -9   0    5.19    0.91
  -2  -9   0    6.59    0.97
  -2  -9   0    5.73    0.77
   2   9   0    5.97    0.82
  -3  -9   0    2.94    0.74
  -3  -9   0    3.56    0.67
   3   9   0    2.41    0.67
   3   9   0    2.17    0.56
  -4  -9   0   26.19    1.47
  -4  -9   0   24.00    1.25
  -4  -9   0   25.10    1.53
   4   9   0   23.60    1.40
  -5  -9   0    4.52    0.67
  -5  -9   0    4.68    0.85
  -5  -9   0    2.34    0.72
   5   9   0    4.19    0.74
  -6  -9   0   11.26    0.92
  -6  -9   0    9.91    1.19
   6   9   0   11.31    1.27
   6   9   0    9.40    1.13
   6   9   0   11.61    1.05
  -7  -9   0    0.10    0.40
  -7  -9   0   -0.38    0.49
   7   9   0   -0.58    0.48
   7   9   0    0.76    0.54
   7   9   0   -0.02    0.38
  -8  -9   0    5.45    1.04
   8   9   0    3.59    0.88
   8   9   0    5.43    0.98
  -9  -9   0   11.56    1.47
   9   9   0    9.24    1.30
 -10  -9   0    3.57    0.99
  10   9   0    4.10    1.02
 -11  -9   0    0.10    0.71
  11   9   0    0.03    0.77
 -12  -9   0    2.48    1.01
  12   9   0    1.33    0.93
 -13  -9   0    2.84    1.11
  13   9   0    1.20    1.01
 -14  -9   0    2.38    1.15
  14   9   0    1.56    1.02
   7 -10   0    5.05    1.30
   7 -10   0    3.71    1.08
  -7  10   0    5.15    1.33
   6 -10   0    0.28    0.76
   6 -10   0    0.27    0.75
  -6  10   0    0.55    0.92
   5 -10   0    9.33    1.43
   5 -10   0    8.85    1.40
  -5  10   0    8.53    1.44
   4 -10   0   16.81    1.80
   4 -10   0   15.24    1.61
  -4  10   0   16.56    1.80
   3 -10   0    9.09    1.34
   3 -10   0   11.49    1.43
  -3  10   0   11.70    1.49
   2 -10   0    2.41    0.82
   2 -10   0    3.33    0.96
  -2  10   0    3.28    0.89
   1 -10   0    2.72    0.80
   1 -10   0    2.70    0.85
  -1  10   0    1.96    0.75
   0 -10   0    0.49    0.56
   0 -10   0    0.07    0.58
   0  10   0    0.30    0.54
  -1 -10   0   58.45    2.42
  -1 -10   0   59.29    2.48
   1  10   0   52.63    2.18
  -2 -10   0    9.84    0.99
  -2 -10   0    9.38    1.13
   2  10   0    8.79    1.06
  -3 -10   0    3.58    0.83
  -3 -10   0    2.94    0.70
   3  10   0    2.78    0.76
   3  10   0    2.50    0.65
  -4 -10   0    5.64    0.88
  -4 -10   0    5.47    0.99
   4  10   0    5.34    0.91
   4  10   0    5.15    0.79
  -5 -10   0    9.62    1.19
  -5 -10   0   11.96    1.11
  -5 -10   0   14.37    1.38
   5  10   0   11.23    1.20
  -6 -10   0    4.80    0.80
  -6 -10   0    3.78    0.89
   6  10   0    6.08    0.91
  -7 -10   0   14.91    1.52
   7  10   0   16.92    1.64
   7  10   0   16.98    1.18
   7  10   0   17.75    1.71
  -8 -10   0    6.23    1.14
   8  10   0    7.31    1.14
   8  10   0    5.17    1.07
  -9 -10   0    2.38    0.84
   9  10   0    0.66    0.75
 -10 -10   0   29.87    2.12
  10  10   0   27.27    2.07
 -11 -10   0    7.77    1.40
  11  10   0   10.41    1.54
 -12 -10   0   27.47    2.24
  12  10   0   28.32    2.25
 -13 -10   0    5.64    1.35
  13  10   0    4.03    1.22
   5 -11   0    1.72    1.04
   5 -11   0    2.36    0.94
  -5  11   0    6.04    1.39
   4 -11   0    1.19    0.84
   4 -11   0   -0.68    0.76
  -4  11   0    1.20    0.87
   3 -11   0    3.25    1.02
   3 -11   0    3.32    1.09
  -3  11   0    4.43    1.15
   2 -11   0   18.52    1.85
   2 -11   0   17.82    1.75
  -2  11   0   15.07    1.66
   1 -11   0    6.59    1.20
   1 -11   0    8.01    1.27
  -1  11   0    6.46    1.16
   0 -11   0    2.23    0.80
   0 -11   0    2.26    0.87
   0  11   0    0.70    0.69
  -1 -11   0    0.80    0.70
  -1 -11   0    0.08    0.60
   1  11   0    1.10    0.64
  -2 -11   0    9.18    1.25
   2  11   0    9.97    1.17
   2  11   0   10.79    1.37
  -3 -11   0    9.19    1.25
  -3 -11   0    9.85    1.11
   3  11   0    9.12    1.10
   3  11   0    9.14    1.27
  -4 -11   0    1.93    0.79
  -4 -11   0    3.23    0.82
   4  11   0    1.87    0.72
   4  11   0    2.79    0.68
  -5 -11   0    6.90    1.13
  -5 -11   0    9.59    1.22
   5  11   0    6.51    1.03
  -6 -11   0    1.99    0.79
   6  11   0    3.68    0.81
  -7 -11   0    7.73    1.19
   7  11   0    5.75    1.12
   7  11   0    6.45    1.10
   7  11   0    6.37    0.93
  -8 -11   0   15.45    1.65
   8  11   0   22.84    2.06
   8  11   0   20.13    1.84
  -9 -11   0    6.07    1.19
   9  11   0    5.15    1.12
 -10 -11   0    0.34    0.79
  10  11   0    0.93    0.83
 -11 -11   0   -0.04    0.76
  11  11   0    0.29    0.90
 -12 -11   0    2.04    1.01
  12  11   0    2.75    1.09
 -13 -11   0    1.54    1.09
  13  11   0    2.20    1.08
   4 -12   0    1.49    0.91
   4 -12   0    2.46    1.05
  -4  12   0    0.27    0.91
   3 -12   0    2.19    0.93
   3 -12   0    1.98    0.95
  -3  12   0    1.53    0.99
   2 -12   0   11.34    1.62
   2 -12   0    6.12    1.21
  -2  12   0    7.81    1.35
   1 -12   0   12.19    1.53
   1 -12   0   14.71    1.81
  -1  12   0   10.83    1.44
   0 -12   0   38.10    2.38
   0 -12   0   39.95    2.31
   0  12   0   35.98    2.12
  -1 -12   0   25.77    1.87
   1  12   0   25.22    1.77
  -2 -12   0    0.15    0.70
   2  12   0    0.29    0.64
   2  12   0   -0.23    0.56
  -3 -12   0    5.76    1.12
   3  12   0    5.91    1.14
  -4 -12   0   19.46    1.46
  -4 -12   0   13.70    1.53
   4  12   0   15.72    1.59
  -5 -12   0   16.55    1.60
  -5 -12   0   13.45    1.53
   5  12   0   17.11    1.66
  -6 -12   0    3.98    1.00
   6  12   0    4.47    0.97
  -7 -12   0    6.75    1.19
   7  12   0    6.30    1.15
   7  12   0    7.31    1.23
  -8 -12   0    4.38    1.10
   8  12   0    3.48    0.99
   8  12   0    2.27    0.97
  -9 -12   0   43.51    2.61
   9  12   0   40.67    2.50
   9  12   0   46.88    2.64
 -10 -12   0   14.17    1.84
  10  12   0    8.69    1.49
 -11 -12   0    7.99    1.48
  11  12   0    8.97    1.58
 -12 -12   0    0.70    0.91
  12  12   0    0.24    0.93
   2 -13   0    7.68    1.43
   2 -13   0   10.70    1.74
  -2  13   0    6.38    1.40
   1 -13   0   -0.67    0.68
  -1  13   0   -1.42    0.62
   0 -13   0    6.56    1.26
   0  13   0    5.54    1.26
  -1 -13   0   20.52    1.97
   1  13   0   20.31    2.07
  -2 -13   0   23.39    1.86
   2  13   0   20.47    2.03
  -3 -13   0   13.54    1.65
   3  13   0   12.06    1.59
  -4 -13   0    2.47    0.94
   4  13   0    3.96    1.02
  -5 -13   0    0.18    0.71
   5  13   0   -0.07    0.66
  -6 -13   0   20.77    1.90
   6  13   0   19.25    1.83
  -7 -13   0    8.09    1.35
   7  13   0    7.46    1.28
   7  13   0    5.22    1.15
  -8 -13   0    3.72    1.15
   8  13   0    3.14    0.95
   8  13   0    0.98    0.88
  -9 -13   0    1.00    0.86
   9  13   0    0.73    0.85
   9  13   0    0.91    0.90
 -10 -13   0    0.57    0.83
  10  13   0    1.08    0.99
  -1 -14   0    5.55    1.24
   1  14   0    5.61    1.40
  -2 -14   0    6.35    1.30
   2  14   0    5.87    1.29
  -3 -14   0    8.30    1.44
   3  14   0    7.30    1.36
  -4 -14   0    2.14    0.91
   4  14   0    2.41    1.03
  -5 -14   0    1.71    0.99
   5  14   0    3.54    1.03
   6  14   0    4.38    1.11
  -7 -14   0    4.98    1.20
   7  14   0    7.56    1.41
   7  14   0    5.44    1.27
  -8 -14   0   12.79    1.71
   8  14   0   13.37    1.74
   8  14   0   10.81    1.65
   7  14  -1   20.20    2.09
   7  14  -1   20.55    2.05
   6  14  -1    1.52    0.98
  -6 -14   1    1.99    1.03
   5  14  -1    7.96    1.43
  -5 -14   1    4.19    1.20
   4  14  -1    8.84    1.50
  -4 -14   1    8.97    1.49
   3  14  -1   14.58    1.89
  -3 -14   1   13.80    1.79
   2  14  -1    7.34    1.45
  -2 -14   1    7.35    1.39
   9  13  -1   -0.24    0.80
   9  13  -1    0.50    0.85
  -9 -13   1   -0.08    0.79
   8  13  -1    0.06    0.74
   8  13  -1    1.69    0.94
  -8 -13   1    1.60    0.88
   7  13  -1   13.81    1.80
   7  13  -1   16.13    1.83
  -7 -13   1   13.34    1.66
   6  13  -1    9.00    1.34
  -6 -13   1    7.57    1.32
   5  13  -1   17.59    1.82
  -5 -13   1   16.59    1.79
   4  13  -1   -0.55    0.64
  -4 -13   1    0.71    0.81
   3  13  -1    0.38    0.75
  -3 -13   1    0.54    0.80
   2  13  -1    6.91    1.37
  -2 -13   1    4.57    1.16
   1  13  -1    9.94    1.51
  -1 -13   1    8.12    1.40
   0  13  -1    6.09    1.38
   0 -13   1    5.63    1.26
  -1  13  -1   -0.51    0.72
   1 -13   1    0.21    0.77
  11  12  -1    3.67    1.13
 -11 -12   1    3.84    1.24
  10  12  -1   27.47    2.24
 -10 -12   1   30.58    2.33
   9  12  -1    5.61    1.25
   9  12  -1    2.71    1.01
  -9 -12   1    4.61    1.14
   8  12  -1    5.05    1.14
   8  12  -1    3.05    1.03
  -8 -12   1    3.14    0.96
   7  12  -1    3.03    1.02
   7  12  -1    4.11    1.05
  -7 -12   1    2.90    0.94
   6  12  -1   22.18    1.68
  -6 -12   1   20.05    1.95
  -6 -12   1   24.22    1.80
   5  12  -1   14.09    1.53
  -5 -12   1   13.69    1.52
  -5 -12   1   13.97    1.63
   4  12  -1    9.37    1.37
  -4 -12   1   12.67    1.52
   3  12  -1    8.13    1.34
  -3 -12   1    6.76    1.20
   2  12  -1    0.89    0.73
  -2 -12   1    0.00    0.67
   1  12  -1   12.57    1.67
  -1 -12   1   17.69    1.83
   0  12  -1   14.57    1.74
   0 -12   1   12.55    1.62
  -1  12  -1    7.08    1.33
  -1  12  -1    8.41    1.30
   1 -12   1    5.66    1.21
  -2  12  -1    0.43    0.82
   2 -12   1    0.37    0.75
  -3  12  -1    2.59    1.09
   3 -12   1    2.42    0.95
  12  11  -1    9.77    1.70
 -12 -11   1   11.00    1.73
  11  11  -1    1.13    0.92
 -11 -11   1    4.99    1.27
  10  11  -1    2.65    1.08
 -10 -11   1    1.59    0.97
   9  11  -1    8.34    1.45
   9  11  -1   10.28    1.56
  -9 -11   1    8.49    1.44
   8  11  -1   14.44    1.61
   8  11  -1   14.59    1.70
  -8 -11   1   18.19    1.83
   7  11  -1    8.84    1.35
   7  11  -1    9.08    1.36
   7  11  -1    8.11    1.08
  -7 -11   1    8.85    1.31
   6  11  -1   18.78    1.44
  -6 -11   1   21.90    1.76
  -6 -11   1   22.01    1.66
   5  11  -1   -0.36    0.56
  -5 -11   1    0.32    0.62
  -5 -11   1   -0.45    0.58
   4  11  -1    6.08    1.06
  -4 -11   1    4.18    0.98
  -4 -11   1    5.71    0.98
   3  11  -1   28.70    1.87
  -3 -11   1   26.37    1.85
  -3 -11   1   26.01    1.59
   2  11  -1   30.94    1.99
   2  11  -1   30.82    1.67
  -2 -11   1   28.22    1.87
   1  11  -1   24.46    1.88
   1  11  -1   23.86    1.57
  -1 -11   1   24.67    1.78
   0  11  -1    5.68    1.15
   0  11  -1    9.45    1.20
   0 -11   1    6.35    1.13
  -1  11  -1    1.12    0.74
   1 -11   1    1.67    0.84
  -2  11  -1   23.91    1.85
   2 -11   1   25.47    1.89
   2 -11   1   27.66    2.12
  -3  11  -1   17.00    1.79
   3 -11   1   19.07    1.93
   3 -11   1   17.10    1.92
  -4  11  -1   10.12    1.55
   4 -11   1    9.93    1.51
   4 -11   1    8.99    1.51
  -5  11  -1   -0.19    0.83
   5 -11   1    1.01    0.84
   5 -11   1    0.78    0.89
  13  10  -1    1.24    1.08
 -13 -10   1    2.62    1.19
  12  10  -1    2.29    1.08
 -12 -10   1    2.01    0.98
  11  10  -1   20.07    2.15
 -11 -10   1   24.48    2.30
  10  10  -1    7.99    1.34
 -10 -10   1   11.40    1.61
   9  10  -1    3.98    1.08
  -9 -10   1    2.81    0.93
   8  10  -1    5.82    1.08
   8  10  -1    6.21    1.14
  -8 -10   1    7.22    1.18
   7  10  -1   15.76    1.64
   7  10  -1   14.30    1.29
   7  10  -1   13.90    1.50
  -7 -10   1   13.24    1.48
   6  10  -1   21.60    1.42
  -6 -10   1   20.84    1.56
   5  10  -1    5.61    0.92
  -5 -10   1    7.25    1.09
  -5 -10   1    5.36    0.94
   4  10  -1   -0.07    0.47
  -4 -10   1   -0.60    0.45
  -4 -10   1   -0.41    0.52
   3  10  -1    0.18    0.41
   3  10  -1    0.80    0.58
  -3 -10   1   -0.42    0.56
  -3 -10   1    0.57    0.51
   2  10  -1   25.50    1.73
   2  10  -1   22.27    1.36
  -2 -10   1   24.43    1.38
  -2 -10   1   22.43    1.59
   1  10  -1   27.43    1.79
   1  10  -1   25.71    1.51
  -1 -10   1   26.80    1.75
   0  10  -1   -0.41    0.46
   0 -10   1    0.81    0.63
  -1  10  -1    0.33    0.57
   1 -10   1   -0.44    0.54
   1 -10   1   -0.10    0.67
  -2  10  -1    5.52    1.03
   2 -10   1    5.66    1.07
   2 -10   1    3.21    0.93
  -3  10  -1    5.23    1.08
   3 -10   1    3.70    0.99
   3 -10   1    2.43    0.94
  -4  10  -1    8.36    1.38
   4 -10   1    7.29    1.29
   4 -10   1    8.70    1.39
  -5  10  -1    2.18    1.00
   5 -10   1    1.30    0.83
   5 -10   1    2.30    1.00
  -6  10  -1   -0.30    0.84
   6 -10   1   -0.45    0.67
   6 -10   1    1.22    0.90
  13   9  -1    3.22    1.23
 -13  -9   1    2.85    1.10
  12   9  -1    0.39    0.82
 -12  -9   1    1.10    0.86
  11   9  -1    2.23    1.01
 -11  -9   1    0.53    0.72
  10   9  -1   11.05    1.57
 -10  -9   1    9.11    1.41
   9   9  -1   46.41    2.44
  -9  -9   1   43.91    2.38
   8   9  -1    5.13    1.00
   8   9  -1    3.37    0.95
  -8  -9   1    6.27    1.11
   7   9  -1    4.90    0.93
   7   9  -1    4.39    0.75
   7   9  -1    3.96    0.90
  -7  -9   1    6.58    1.04
   6   9  -1   20.64    1.28
  -6  -9   1   21.65    1.51
   5   9  -1   95.36    2.90
  -5  -9   1   92.65    3.13
  -5  -9   1  101.33    2.57
  -5  -9   1  100.53    3.09
   4   9  -1  115.47    2.89
   4   9  -1  114.20    3.32
  -4  -9   1  114.68    3.30
  -4  -9   1  119.31    3.53
   3   9  -1    1.84    0.51
   3   9  -1    2.67    0.70
  -3  -9   1    1.26    0.54
  -3  -9   1    2.45    0.72
   2   9  -1   16.28    1.32
   2   9  -1   17.11    1.08
  -2  -9   1   17.24    1.37
  -2  -9   1   15.50    1.09
   1   9  -1   63.42    2.18
  -1  -9   1   61.67    2.43
  -1  -9   1   61.22    1.97
   0   9  -1   17.68    1.26
   0  -9   1   19.35    1.46
   0  -9   1   18.80    1.48
  -1   9  -1   16.04    1.28
   1  -9   1   15.76    1.52
   1  -9   1   16.74    1.38
  -2   9  -1   -0.49    0.49
   2  -9   1    0.04    0.54
   2  -9   1    0.36    0.57
  -3   9  -1    1.69    0.80
   3  -9   1    0.98    0.73
   3  -9   1    1.03    0.68
  -4   9  -1   20.69    1.90
   4  -9   1   19.09    1.84
   4  -9   1   17.92    1.81
  -5   9  -1    7.97    1.33
   5  -9   1    8.61    1.35
   5  -9   1    7.86    1.28
  -6   9  -1   33.35    2.29
   6  -9   1   28.83    2.15
   6  -9   1   31.85    2.12
  -7   9  -1    5.52    1.36
   7  -9   1    6.41    1.27
   7  -9   1    6.16    1.31
  -8   9  -1   -0.12    0.87
   8  -9   1    1.44    0.94
   8  -9   1    0.90    0.77
  14   8  -1    3.44    1.19
 -14  -8   1    6.11    1.40
  13   8  -1    9.60    1.60
 -13  -8   1    8.77    1.51
  12   8  -1   15.61    1.90
 -12  -8   1   11.51    1.61
  11   8  -1   11.21    1.55
 -11  -8   1   13.15    1.65
  10   8  -1    1.89    0.87
 -10  -8   1    3.45    1.01
   9   8  -1    2.54    0.79
  -9  -8   1    1.42    0.78
   8   8  -1    3.42    0.90
   8   8  -1    3.61    0.60
  -8  -8   1    1.49    0.73
   7   8  -1   30.04    1.78
   7   8  -1   31.79    1.75
   7   8  -1   28.52    1.35
  -7  -8   1   35.42    1.86
  -7  -8   1   29.56    1.32
   6   8  -1    8.42    0.92
   6   8  -1    8.22    1.06
   6   8  -1    7.22    1.02
  -6  -8   1    7.30    1.03
  -6  -8   1    7.36    0.74
   5   8  -1    3.63    0.66
  -5  -8   1    3.04    0.73
  -5  -8   1    4.09    0.57
  -5  -8   1    3.20    0.75
   4   8  -1    8.68    0.96
  -4  -8   1    7.50    0.93
  -4  -8   1    7.68    1.01
  -4  -8   1    7.65    0.75
   3   8  -1   10.22    1.07
   3   8  -1   10.17    0.90
  -3  -8   1   11.21    1.18
  -3  -8   1    9.04    0.95
   2   8  -1   66.76    2.06
   2   8  -1   66.59    2.39
  -2  -8   1   69.28    2.14
  -2  -8   1   69.68    2.41
   1   8  -1    3.99    0.65
  -1  -8   1    4.00    0.60
  -1  -8   1    5.56    0.89
   0   8  -1   10.58    1.02
   0  -8   1    9.74    1.13
   0  -8   1   12.08    1.20
   0  -8   1   10.87    0.76
  -1   8  -1    2.18    0.64
   1  -8   1    2.55    0.75
   1  -8   1    2.61    0.69
  -2   8  -1   22.93    1.46
   2  -8   1   20.47    1.51
   2  -8   1   24.75    1.53
  -3   8  -1   20.95    1.52
   3  -8   1   20.68    1.54
   3  -8   1   23.24    1.55
  -4   8  -1    5.38    1.02
   4  -8   1    5.74    1.05
   4  -8   1    6.40    1.07
  -5   8  -1    0.56    0.72
   5  -8   1    0.22    0.60
   5  -8   1    1.40    0.74
  -6   8  -1   16.68    1.80
   6  -8   1   15.71    1.60
   6  -8   1   16.93    1.79
  -7   8  -1    6.51    1.31
   7  -8   1    7.07    1.28
   7  -8   1    7.53    1.26
  -8   8  -1    7.22    1.39
   8  -8   1    5.58    1.19
   8  -8   1    6.39    1.29
  -9   8  -1    3.32    1.19
   9  -8   1    8.51    1.45
   9  -8   1    8.06    1.40
  14   7  -1    1.16    1.00
 -14  -7   1    0.70    0.88
  13   7  -1    3.99    1.14
 -13  -7   1    2.23    0.99
  12   7  -1   26.82    2.08
 -12  -7   1   27.45    2.06
  11   7  -1    5.16    1.17
 -11  -7   1    4.81    1.09
  10   7  -1   20.74    1.70
 -10  -7   1   20.33    1.89
   9   7  -1    2.99    0.85
  -9  -7   1    0.12    0.59
  -9  -7   1    1.05    0.47
   8   7  -1   11.87    1.30
   8   7  -1   11.93    0.85
  -8  -7   1   12.48    0.89
  -8  -7   1   13.90    1.42
   7   7  -1   26.64    1.61
   7   7  -1   26.38    1.20
   7   7  -1   31.34    1.68
  -7  -7   1   29.34    1.67
  -7  -7   1   29.58    1.22
   6   7  -1   10.75    1.08
   6   7  -1   14.71    1.17
   6   7  -1   13.41    0.91
  -6  -7   1   13.28    0.83
  -6  -7   1   15.20    1.38
   5   7  -1   17.87    1.05
  -5  -7   1   17.40    1.20
  -5  -7   1   19.05    1.25
  -5  -7   1   19.72    0.93
   4   7  -1    0.69    0.39
  -4  -7   1    0.25    0.46
  -4  -7   1    0.40    0.41
  -4  -7   1    0.08    0.29
   3   7  -1    6.75    0.83
  -3  -7   1    5.64    0.77
  -3  -7   1    5.88    0.82
   2   7  -1   13.38    1.03
   2   7  -1   14.18    0.86
  -2  -7   1   15.20    0.96
  -2  -7   1   14.74    1.08
   1   7  -1   48.09    1.63
  -1  -7   1   43.83    1.52
  -1  -7   1   48.80    1.88
   0   7  -1   25.82    1.25
   0  -7   1   27.32    1.07
   0  -7   1   26.36    1.39
   0  -7   1   25.09    1.42
  -1   7  -1    2.84    0.61
   1  -7   1    2.74    0.65
   1  -7   1    3.51    0.43
   1  -7   1    3.10    0.72
  -2   7  -1    6.27    0.88
   2  -7   1    7.05    0.98
   2  -7   1    7.62    0.99
  -3   7  -1   60.36    2.33
   3  -7   1   62.52    2.36
   3  -7   1   60.02    2.39
  -4   7  -1   13.53    1.40
   4  -7   1   16.05    1.50
   4  -7   1   13.47    1.42
  -5   7  -1    9.34    1.28
   5  -7   1   10.04    1.23
   5  -7   1    8.10    1.15
  -6   7  -1   -0.28    0.65
   6  -7   1    0.07    0.58
   6  -7   1   -0.03    0.56
  -7   7  -1    0.87    0.80
   7  -7   1    2.16    0.85
   7  -7   1    0.24    0.60
  -8   7  -1   14.13    1.78
   8  -7   1   20.01    1.88
   8  -7   1   19.21    1.88
  -9   7  -1    5.91    1.34
   9  -7   1    6.65    1.26
   9  -7   1    8.35    1.37
 -10   7  -1    2.97    1.20
  10  -7   1    4.97    1.25
  10  -7   1    2.19    0.95
  14   6  -1    9.11    1.58
 -14  -6   1   11.01    1.58
  13   6  -1    3.24    1.10
 -13  -6   1    3.26    1.01
  12   6  -1   -0.11    0.71
 -12  -6   1    0.42    0.73
  11   6  -1    8.43    1.37
 -11  -6   1    9.74    1.41
 -11  -6   1    7.56    1.16
  10   6  -1   19.16    1.57
 -10  -6   1   18.84    1.25
 -10  -6   1   16.44    1.66
   9   6  -1    8.96    1.20
  -9  -6   1    8.76    0.91
  -9  -6   1    9.81    1.24
   8   6  -1   38.68    1.35
   8   6  -1   38.86    1.92
  -8  -6   1   38.34    1.92
  -8  -6   1   38.55    1.49
   7   6  -1    7.01    0.93
   7   6  -1    7.25    0.69
  -7  -6   1    6.40    0.70
  -7  -6   1    8.26    1.06
   6   6  -1    6.67    0.87
   6   6  -1    6.54    0.67
   6   6  -1    5.04    0.75
  -6  -6   1    5.87    0.86
  -6  -6   1    5.99    0.61
   5   6  -1   54.09    1.94
   5   6  -1   53.31    1.97
   5   6  -1   49.73    1.62
  -5  -6   1   51.16    1.47
  -5  -6   1   52.52    1.96
   4   6  -1   38.64    1.43
  -4  -6   1   40.27    1.65
  -4  -6   1   38.98    1.59
  -4  -6   1   39.81    1.24
   3   6  -1  133.58    3.15
  -3  -6   1  139.51    3.22
  -3  -6   1  136.34    2.80
  -3  -6   1  137.80    3.34
   2   6  -1    3.90    0.50
   2   6  -1    3.67    0.63
  -2  -6   1    3.44    0.55
  -2  -6   1    3.77    0.67
   1   6  -1    3.02    0.50
  -1  -6   1    3.91    0.66
  -1  -6   1    3.13    0.60
  -1  -6   1    3.59    0.53
   0   6  -1   32.02    1.29
   0  -6   1   30.07    1.38
   0  -6   1   29.87    1.42
   0  -6   1   30.14    1.07
  -1   6  -1   65.60    2.08
   1  -6   1   66.80    2.17
   1  -6   1   67.20    2.23
   1  -6   1   69.34    1.55
  -2   6  -1   31.33    0.78
  -2   6  -1   31.59    1.47
   2  -6   1   32.44    1.51
   2  -6   1   31.50    1.55
  -3   6  -1    0.10    0.43
   3  -6   1    0.28    0.44
   3  -6   1    0.48    0.45
  -4   6  -1   16.07    1.26
   4  -6   1   10.33    1.12
   4  -6   1   15.56    1.19
  -5   6  -1   70.46    2.66
   5  -6   1   75.06    2.67
   5  -6   1   76.18    2.69
  -6   6  -1   57.14    2.51
   6  -6   1   59.78    2.45
   6  -6   1   55.73    2.39
  -7   6  -1    0.28    0.73
   7  -6   1    0.68    0.66
   7  -6   1    1.05    0.65
  -8   6  -1   -0.50    0.68
   8  -6   1    1.67    0.74
   8  -6   1    1.63    0.74
  -9   6  -1   -0.45    0.71
   9  -6   1   -0.57    0.68
   9  -6   1    1.52    0.79
 -10   6  -1   28.93    2.34
  10  -6   1   25.70    2.07
  10  -6   1   30.22    2.06
 -11   6  -1    6.68    1.49
  11  -6   1    3.55    1.12
  11  -6   1    4.14    1.05
  14   5  -1    0.43    0.90
 -14  -5   1   -0.44    0.65
  13   5  -1   11.65    1.63
 -13  -5   1    7.88    1.32
  12   5  -1    0.85    0.80
 -12  -5   1    0.40    0.65
 -12  -5   1    1.53    0.68
  11   5  -1    1.38    0.70
 -11  -5   1    0.57    0.55
 -11  -5   1    1.19    0.69
  10   5  -1    1.80    0.78
 -10  -5   1    1.78    0.74
 -10  -5   1    1.44    0.57
   9   5  -1   -0.03    0.46
  -9  -5   1   -0.30    0.49
  -9  -5   1    0.13    0.39
   8   5  -1   27.11    1.06
   8   5  -1   28.82    1.62
  -8  -5   1   27.50    1.30
  -8  -5   1   25.12    1.53
   7   5  -1    0.41    0.28
   7   5  -1   -0.16    0.41
  -7  -5   1   -0.08    0.40
  -7  -5   1    0.53    0.37
   6   5  -1   23.28    0.99
   6   5  -1   24.48    1.32
   6   5  -1   24.67    1.34
  -6  -5   1   21.75    0.97
  -6  -5   1   23.16    1.30
   5   5  -1    0.56    0.42
   5   5  -1    1.23    0.36
   5   5  -1    1.19    0.47
  -5  -5   1    1.25    0.34
  -5  -5   1    1.05    0.41
   4   5  -1   60.72    1.72
  -4  -5   1   61.80    2.00
  -4  -5   1   61.08    1.96
  -4  -5   1   63.25    1.54
   3   5  -1  101.84    2.42
  -3  -5   1  100.57    2.62
  -3  -5   1   99.53    2.53
  -3  -5   1  102.66    2.14
   2   5  -1   33.67    1.28
  -2  -5   1   31.92    1.32
  -2  -5   1   30.57    1.19
  -2  -5   1   31.39    1.04
   1   5  -1   63.23    1.64
  -1  -5   1   59.92    1.64
  -1  -5   1   64.29    1.90
   0   5  -1    1.23    0.38
   0  -5   1    1.41    0.45
   0  -5   1    1.52    0.47
   0  -5   1    1.83    0.36
  -1   5  -1    1.75    0.47
   1  -5   1    2.89    0.34
   1  -5   1    2.23    0.55
   1  -5   1    1.73    0.48
  -2   5  -1   17.58    1.05
  -2   5  -1   17.05    0.48
   2  -5   1   14.44    1.00
   2  -5   1   17.95    1.11
  -3   5  -1   11.53    1.07
   3  -5   1   12.12    0.97
   3  -5   1   11.22    1.04
  -4   5  -1    5.62    0.82
   4  -5   1    8.36    0.98
   4  -5   1    8.13    0.94
  -5   5  -1   13.83    1.38
   5  -5   1   14.50    1.12
   5  -5   1   14.39    1.33
  -6   5  -1    3.33    0.88
   6  -5   1    2.91    0.71
   6  -5   1    2.08    0.65
  -7   5  -1   36.53    2.06
   7  -5   1   34.58    1.81
   7  -5   1   37.61    1.95
  -8   5  -1    8.17    1.26
   8  -5   1    8.90    1.24
   8  -5   1    8.69    1.15
  -9   5  -1    7.73    1.33
   9  -5   1    5.42    0.99
   9  -5   1   10.20    1.41
 -10   5  -1    0.75    0.94
  10  -5   1    1.08    0.65
  10  -5   1    0.36    0.70
 -11   5  -1    2.53    1.12
  11  -5   1    1.49    0.88
  11  -5   1    2.33    0.89
  14   4  -1    1.23    0.98
 -14  -4   1    0.65    0.77
  13   4  -1    8.22    1.51
 -13  -4   1    7.21    1.19
 -13  -4   1    6.72    1.22
  12   4  -1    4.86    1.13
 -12  -4   1    4.29    0.92
 -12  -4   1    5.11    1.07
  11   4  -1   35.13    2.09
 -11  -4   1   34.69    1.80
 -11  -4   1   35.36    2.02
  10   4  -1    0.10    0.55
 -10  -4   1    0.07    0.46
 -10  -4   1    0.83    0.59
   9   4  -1    0.13    0.46
  -9  -4   1    0.32    0.45
  -9  -4   1    0.65    0.53
   8   4  -1   -0.15    0.44
   8   4  -1    0.09    0.26
  -8  -4   1   -0.10    0.41
  -8  -4   1    0.64    0.42
   7   4  -1   17.56    0.81
   7   4  -1   18.12    1.22
  -7  -4   1   18.21    1.00
  -7  -4   1   18.40    1.22
   6   4  -1   96.73    2.14
   6   4  -1  100.90    2.75
  -6  -4   1   92.71    2.27
  -6  -4   1   93.90    2.71
   5   4  -1    1.57    0.34
   5   4  -1    0.31    0.40
   5   4  -1    1.53    0.46
  -5  -4   1    1.62    0.50
  -5  -4   1    1.76    0.36
   4   4  -1    5.90    0.69
   4   4  -1    6.67    0.60
   4   4  -1    5.32    0.66
  -4  -4   1    5.64    0.72
  -4  -4   1    5.83    0.51
   3   4  -1   99.08    2.25
  -3  -4   1  104.76    2.49
  -3  -4   1  106.30    2.53
  -3  -4   1  103.33    2.05
   2   4  -1   69.91    1.80
  -2  -4   1   69.01    1.89
  -2  -4   1   67.99    1.80
  -2  -4   1   68.08    1.51
   1   4  -1  121.01    2.69
   1   4  -1  122.26    2.41
  -1  -4   1  122.56    2.72
  -1  -4   1  119.56    2.50
   0   4  -1   21.62    0.88
   0  -4   1   20.35    0.98
   0  -4   1   21.05    0.78
   0  -4   1   23.11    1.05
  -1   4  -1   11.33    0.78
   1  -4   1   11.94    0.80
   1  -4   1   11.23    0.49
   1  -4   1   11.00    0.79
  -2   4  -1   25.55    1.17
   2  -4   1   25.82    1.20
   2  -4   1   27.45    1.21
  -3   4  -1   16.74    1.07
   3  -4   1   18.46    1.08
   3  -4   1   20.41    1.10
  -4   4  -1  121.21    3.17
   4  -4   1  118.97    3.06
   4  -4   1  120.63    3.06
  -5   4  -1   11.86    1.20
   5  -4   1    9.74    1.05
   5  -4   1   11.10    1.07
  -6   4  -1   -0.20    0.49
   6  -4   1   -0.16    0.38
   6  -4   1   -0.62    0.39
  -7   4  -1    3.89    0.95
   7  -4   1    2.64    0.66
   7  -4   1    3.04    0.75
  -8   4  -1   13.64    1.55
   8  -4   1   12.07    1.36
   8  -4   1   11.42    1.17
  -9   4  -1   38.37    2.22
   9  -4   1   41.92    1.97
   9  -4   1   39.79    2.15
 -10   4  -1   15.14    1.84
  10  -4   1   10.99    1.27
  10  -4   1   13.13    1.57
 -11   4  -1    3.32    1.11
  11  -4   1    3.85    1.07
 -12   4  -1    0.58    0.86
  12  -4   1    1.03    0.90
  14   3  -1   13.35    1.87
 -14  -3   1   12.63    1.65
 -14  -3   1   11.06    1.50
  13   3  -1    2.04    1.00
 -13  -3   1    2.49    0.87
 -13  -3   1    3.01    0.89
  12   3  -1    0.29    0.70
 -12  -3   1   -0.28    0.57
 -12  -3   1    0.08    0.57
  11   3  -1    4.26    0.99
 -11  -3   1    4.44    0.87
 -11  -3   1    5.77    1.01
  10   3  -1   32.87    1.89
 -10  -3   1   32.01    1.69
 -10  -3   1   37.09    1.86
   9   3  -1   55.69    1.60
   9   3  -1   54.14    2.26
  -9  -3   1   55.30    2.19
  -9  -3   1   55.31    2.10
   8   3  -1    0.30    0.25
   8   3  -1    0.09    0.43
  -8  -3   1    0.10    0.40
  -8  -3   1    0.61    0.46
   7   3  -1   18.52    1.21
   7   3  -1   21.38    0.87
  -7  -3   1   21.18    1.25
  -7  -3   1   19.20    1.05
   6   3  -1    2.35    0.55
   6   3  -1    2.86    0.39
  -6  -3   1    2.37    0.52
  -6  -3   1    2.07    0.44
   5   3  -1   13.50    0.92
   5   3  -1   13.51    0.66
  -5  -3   1   10.63    0.85
  -5  -3   1   12.24    0.72
   4   3  -1   44.28    1.47
   4   3  -1   42.49    1.48
   4   3  -1   47.08    1.24
  -4  -3   1   45.41    1.50
  -4  -3   1   44.75    1.20
   3   3  -1    1.62    0.33
  -3  -3   1    1.72    0.43
  -3  -3   1    1.43    0.27
   2   3  -1   76.07    1.76
  -2  -3   1   78.39    1.51
  -2  -3   1   78.37    1.91
  -2  -3   1   76.86    1.85
   1   3  -1    9.51    0.66
  -1  -3   1    8.78    0.56
  -1  -3   1   11.08    0.70
   0   3  -1   30.60    0.93
   0  -3   1   29.25    1.05
   0  -3   1   30.06    0.86
   0  -3   1   28.52    1.07
  -1   3  -1   24.44    0.94
   1  -3   1   21.63    0.96
   1  -3   1   23.66    0.63
   1  -3   1   23.90    0.99
  -2   3  -1   50.74    1.56
   2  -3   1   51.72    1.58
   2  -3   1   51.29    1.56
  -3   3  -1   49.80    1.63
   3  -3   1   45.45    1.59
   3  -3   1   49.69    1.60
  -4   3  -1   28.98    1.36
   4  -3   1   25.73    1.25
   4  -3   1   25.69    1.21
  -5   3  -1   24.71    1.37
   5  -3   1   26.11    1.24
   5  -3   1   26.03    1.33
  -6   3  -1   14.78    1.20
   6  -3   1   15.66    1.15
   6  -3   1   16.06    1.05
  -7   3  -1   31.17    1.74
   7  -3   1   31.11    1.66
   7  -3   1   30.84    1.48
  -8   3  -1    0.41    0.57
   8  -3   1    1.09    0.52
   8  -3   1    0.24    0.54
  -9   3  -1   12.31    1.55
   9  -3   1   10.84    1.15
   9  -3   1   11.15    1.34
 -10   3  -1    3.04    0.99
  10  -3   1    1.17    0.58
  10  -3   1    3.37    0.92
 -11   3  -1   18.92    2.00
  11  -3   1   23.22    1.90
 -12   3  -1   15.57    1.97
  12  -3   1   10.91    1.63
 -13   3  -1    0.97    0.99
  13  -3   1    0.88    0.89
  14   2  -1   23.85    2.37
 -14  -2   1   23.26    2.20
  13   2  -1    6.54    1.29
 -13  -2   1    4.88    1.00
 -13  -2   1    5.05    1.16
  12   2  -1   10.27    1.47
 -12  -2   1    7.59    1.26
 -12  -2   1    8.10    1.12
  11   2  -1    0.42    0.71
 -11  -2   1    0.87    0.56
 -11  -2   1    1.09    0.68
  10   2  -1    0.76    0.64
 -10  -2   1    0.86    0.53
 -10  -2   1    1.89    0.68
   9   2  -1   38.28    1.32
   9   2  -1   34.48    1.77
  -9  -2   1   33.62    1.67
  -9  -2   1   35.13    1.72
   8   2  -1    4.60    0.55
   8   2  -1    5.48    0.87
  -8  -2   1    5.30    0.80
  -8  -2   1    5.22    0.78
   7   2  -1   56.10    2.03
   7   2  -1   57.33    1.52
  -7  -2   1   53.53    1.90
  -7  -2   1   55.27    1.85
   6   2  -1    0.41    0.25
   6   2  -1    0.62    0.42
  -6  -2   1    0.44    0.36
  -6  -2   1    0.23    0.36
   5   2  -1   63.94    1.92
   5   2  -1   65.99    1.53
  -5  -2   1   63.45    1.87
  -5  -2   1   63.93    1.73
   4   2  -1   36.27    1.29
   4   2  -1   35.33    1.01
  -4  -2   1   37.12    1.30
  -4  -2   1   36.99    1.11
   3   2  -1   54.67    1.48
   3   2  -1   57.62    1.56
   3   2  -1   54.84    1.29
  -3  -2   1   56.32    1.28
  -3  -2   1   55.63    1.52
   2   2  -1  168.86    2.95
  -2  -2   1  164.04    3.11
  -2  -2   1  164.13    2.73
  -2  -2   1  164.87    3.12
   1   2  -1   59.52    1.37
  -1  -2   1   60.99    1.12
  -1  -2   1   59.07    1.42
  -1  -2   1   58.32    1.36
   0   2  -1    0.96    0.24
   0  -2   1    0.80    0.30
   0  -2   1    0.72    0.22
  -1   2  -1   15.39    0.69
  -1   2  -1   16.19    0.42
   1  -2   1   13.86    0.71
   1  -2   1   15.15    0.42
  -2   2  -1    6.29    0.61
   2  -2   1    5.66    0.61
   2  -2   1    4.58    0.50
  -3   2  -1   50.07    1.58
   3  -2   1   50.75    1.48
   3  -2   1   49.07    1.54
  -4   2  -1    3.09    0.59
  -4   2  -1    3.81    0.25
   4  -2   1    4.35    0.65
   4  -2   1    3.40    0.51
  -5   2  -1   -0.08    0.40
  -5   2  -1   -0.15    0.15
   5  -2   1    0.19    0.30
   5  -2   1   -0.13    0.37
  -6   2  -1   29.80    0.88
  -6   2  -1   28.87    1.51
   6  -2   1   31.23    1.30
   6  -2   1   27.22    1.41
  -7   2  -1   38.40    1.85
  -7   2  -1   39.93    1.15
   7  -2   1   38.99    1.55
   7  -2   1   43.22    1.85
  -8   2  -1   30.63    1.74
   8  -2   1   34.09    1.49
   8  -2   1   31.61    1.72
  -9   2  -1    6.78    1.09
   9  -2   1    9.93    1.27
   9  -2   1    8.05    0.95
 -10   2  -1    0.79    0.80
  10  -2   1    2.86    0.87
  10  -2   1    3.22    0.67
 -11   2  -1    5.81    1.31
  11  -2   1    9.51    1.47
 -12   2  -1   12.57    1.72
  12  -2   1   14.04    1.78
 -13   2  -1    7.28    1.44
  13  -2   1    8.93    1.54
  14   1  -1    0.07    0.82
 -14  -1   1   -1.12    0.70
  13   1  -1    2.34    1.07
 -13  -1   1    2.06    0.92
  12   1  -1   13.45    1.64
 -12  -1   1   13.52    1.37
 -12  -1   1   13.65    1.55
  11   1  -1   10.76    1.40
 -11  -1   1   11.69    1.24
 -11  -1   1   10.87    1.38
  10   1  -1   11.84    1.37
 -10  -1   1   14.67    1.49
 -10  -1   1   12.18    1.20
   9   1  -1    0.65    0.36
   9   1  -1    0.20    0.54
  -9  -1   1    0.88    0.49
  -9  -1   1    0.13    0.52
   8   1  -1   11.71    1.17
   8   1  -1    9.74    0.72
  -8  -1   1   10.01    0.99
  -8  -1   1   10.50    1.10
   7   1  -1   33.10    1.17
   7   1  -1   33.31    1.55
  -7  -1   1   30.69    1.44
  -7  -1   1   32.03    1.37
   6   1  -1   13.82    0.72
   6   1  -1   13.98    0.99
  -6  -1   1   12.60    0.93
  -6  -1   1   12.55    0.86
   5   1  -1   74.36    1.72
   5   1  -1   76.32    2.11
  -5  -1   1   77.02    2.01
  -5  -1   1   73.74    1.98
   4   1  -1    0.43    0.36
   4   1  -1    0.09    0.21
  -4  -1   1    0.13    0.32
  -4  -1   1    0.25    0.31
   3   1  -1   15.29    0.61
   3   1  -1   12.77    0.71
  -3  -1   1   13.62    0.66
  -3  -1   1   14.00    0.73
   2   1  -1   76.48    1.67
   2   1  -1   78.14    1.64
   2   1  -1   79.38    1.54
  -2  -1   1   78.96    1.50
  -2  -1   1   80.53    1.71
   1   1  -1   95.11    1.50
   1   1  -1   96.12    1.75
  -1  -1   1   92.60    1.79
  -1  -1   1   91.65    1.49
  -1  -1   1   95.07    1.80
   0   1  -1    1.76    0.26
   0   1  -1    2.11    0.18
   0  -1   1    1.90    0.18
   0  -1   1    1.92    0.25
   0  -1   1    1.85    0.21
  -1   1  -1    8.84    0.46
  -1   1  -1    8.35    0.27
   1  -1   1    8.90    0.47
   1  -1   1    8.51    0.49
   1  -1   1    8.17    0.27
  -2   1  -1   67.79    1.61
   2  -1   1   69.31    1.63
   2  -1   1   67.95    1.15
   2  -1   1   69.15    1.51
   2  -1   1   66.01    1.15
  -3   1  -1    4.81    0.59
  -3   1  -1    4.74    0.31
   3  -1   1    5.21    0.59
   3  -1   1    5.35    0.50
  -4   1  -1   52.92    1.16
  -4   1  -1   50.68    1.65
   4  -1   1   51.77    1.42
   4  -1   1   49.43    1.59
  -5   1  -1   24.50    1.25
  -5   1  -1   24.29    0.81
   5  -1   1   24.58    1.00
   5  -1   1   23.50    1.15
  -6   1  -1   51.09    1.91
  -6   1  -1   51.28    1.36
   6  -1   1   48.51    1.83
   6  -1   1   49.44    1.54
  -7   1  -1    0.55    0.51
  -7   1  -1    0.55    0.28
   7  -1   1    0.22    0.46
   7  -1   1    0.17    0.29
  -8   1  -1   60.55    2.37
  -8   1  -1   60.90    1.73
   8  -1   1   62.19    2.36
   8  -1   1   61.76    1.92
  -9   1  -1    9.71    0.75
  -9   1  -1    8.53    1.21
   9  -1   1    8.76    0.89
   9  -1   1    7.53    1.07
 -10   1  -1   11.61    1.39
  10  -1   1   14.91    1.54
  10  -1   1   14.10    1.03
 -11   1  -1    1.81    0.88
  11  -1   1    0.81    0.74
 -12   1  -1   -0.02    0.77
  12  -1   1   -0.04    0.74
 -13   1  -1    2.57    1.06
  13  -1   1    2.27    1.00
 -14   1  -1    4.63    1.36
  14  -1   1    6.85    1.44
  14   0  -1    7.38    1.48
 -14   0   1    6.62    1.44
  13   0  -1    0.91    0.85
 -13   0   1   -0.25    0.83
  12   0  -1    1.33    0.84
 -12   0   1    2.31    0.92
  11   0  -1    0.86    0.72
 -11   0   1    0.79    0.51
 -11   0   1    0.88    0.79
  10   0  -1   18.71    1.54
  10   0  -1   19.49    1.14
 -10   0   1   17.52    1.21
 -10   0   1   20.16    1.57
   9   0  -1    0.77    0.59
   9   0  -1    0.45    0.35
  -9   0   1   -0.35    0.49
  -9   0   1    1.05    0.47
   8   0  -1   11.99    0.82
   8   0  -1   13.30    1.30
  -8   0   1   10.61    0.97
  -8   0   1   13.29    1.28
   7   0  -1    0.88    0.52
   7   0  -1    0.78    0.35
  -7   0   1    0.55    0.36
  -7   0   1    0.30    0.44
   6   0  -1   49.10    1.76
   6   0  -1   47.61    1.46
  -6   0   1   50.88    1.79
  -6   0   1   51.74    1.59
   5   0  -1   23.19    0.92
   5   0  -1   21.82    1.10
  -5   0   1   22.61    0.99
  -5   0   1   23.09    1.12
   4   0  -1    5.85    0.53
   4   0  -1    4.71    0.58
  -4   0   1    5.58    0.62
  -4   0   1    5.43    0.55
   3   0  -1    3.86    0.39
   3   0  -1    3.49    0.46
  -3   0   1    3.59    0.42
  -3   0   1    4.18    0.49
   2   0  -1   47.04    1.15
   2   0  -1   48.38    1.10
  -2   0   1   47.74    1.14
  -2   0   1   45.30    1.13
   1   0  -1   24.36    0.62
   1   0  -1   24.46    0.63
  -1   0   1   25.04    0.60
  -1   0   1   25.59    0.67
   0   0   1  128.38    2.11
   0   0   1  125.55    2.00
   0   0   1  132.82    2.11
  -1   0  -1   33.71    0.77
  -1   0  -1   33.76    0.67
  -1   0  -1   32.61    0.70
   1   0   1   33.87    0.67
   1   0   1   33.01    0.77
  -2   0  -1   42.50    0.88
  -2   0  -1   39.87    1.06
   2   0   1   41.99    0.89
  -3   0  -1   13.29    0.77
  -3   0  -1   14.57    0.57
   3   0   1   14.93    0.77
   3   0   1   15.26    0.58
  -4   0  -1   17.58    0.69
  -4   0  -1   16.48    0.88
   4   0   1   17.24    0.67
   4   0   1   15.83    0.89
  -5   0  -1   37.70    1.44
  -5   0  -1   35.69    1.11
   5   0   1   37.71    1.43
   5   0   1   36.52    1.09
  -6   0  -1   21.31    0.91
  -6   0  -1   19.99    1.18
   6   0   1   20.47    0.86
   6   0   1   22.09    1.21
  -7   0  -1   23.02    1.34
  -7   0  -1   22.33    0.99
   7   0   1   22.80    0.97
   7   0   1   21.55    1.28
  -8   0  -1    4.15    0.82
  -8   0  -1    4.24    0.60
   8   0   1    3.23    0.52
   8   0   1    2.87    0.69
  -9   0  -1    1.79    0.48
  -9   0  -1    1.26    0.63
   9   0   1    0.79    0.53
   9   0   1    1.08    0.40
 -10   0  -1   13.48    1.52
 -10   0  -1   11.58    1.02
  10   0   1    9.68    1.26
  10   0   1   12.23    0.97
 -11   0  -1   31.73    2.04
  11   0   1   29.62    1.95
 -12   0  -1    3.08    0.98
  12   0   1    3.36    1.00
 -13   0  -1    5.22    1.18
  13   0   1    5.80    1.32
 -14   0  -1    1.80    0.94
  14   0   1    1.17    0.92
  13  -1  -1   17.01    1.99
 -13   1   1   14.63    1.81
  12  -1  -1   11.06    1.59
 -12   1   1    7.25    1.32
  11  -1  -1    0.80    0.74
 -11   1   1   -0.18    0.73
  10  -1  -1    0.44    0.64
  10  -1  -1    1.12    0.46
 -10   1   1    1.95    0.82
   9  -1  -1   36.23    1.91
   9  -1  -1   31.47    1.48
  -9   1   1   36.29    1.51
  -9   1   1   33.50    1.91
   8  -1  -1   87.24    2.84
   8  -1  -1   87.42    2.48
  -8   1   1   93.86    2.98
  -8   1   1   91.58    2.44
   7  -1  -1   35.59    1.65
   7  -1  -1   36.60    1.42
  -7   1   1   38.38    1.71
  -7   1   1   37.15    1.37
   6  -1  -1    0.05    0.28
   6  -1  -1   -0.10    0.37
  -6   1   1    0.21    0.27
  -6   1   1    0.17    0.42
   5  -1  -1   11.03    0.95
   5  -1  -1    9.29    0.70
  -5   1   1   10.60    0.97
  -5   1   1   10.75    0.69
   4  -1  -1    4.03    0.49
   4  -1  -1    3.33    0.51
  -4   1   1    3.61    0.60
  -4   1   1    3.40    0.42
   3  -1  -1   65.49    1.58
   3  -1  -1   63.81    1.63
  -3   1   1   65.13    1.73
  -3   1   1   66.14    1.47
   2  -1  -1   15.53    0.67
   2  -1  -1   15.68    0.67
  -2   1   1   15.08    0.73
  -2   1   1   16.11    0.58
   1  -1  -1   67.90    1.39
   1  -1  -1   68.27    1.30
  -1   1   1   68.49    1.29
  -1   1   1   68.51    1.42
   0  -1  -1   15.22    0.45
   0  -1  -1   15.84    0.46
   0   1   1   14.87    0.43
  -1  -1  -1   36.68    0.81
  -1  -1  -1   37.08    0.66
  -1  -1  -1   36.70    0.81
   1   1   1   36.43    0.74
   1   1   1   38.30    0.67
  -2  -1  -1   78.03    1.53
  -2  -1  -1   75.14    1.57
   2   1   1   77.28    1.55
  -3  -1  -1    9.93    0.57
  -3  -1  -1   10.61    0.35
  -3  -1  -1   11.14    0.63
   3   1   1   10.79    0.35
   3   1   1   11.88    0.68
  -4  -1  -1   20.22    0.96
  -4  -1  -1   20.05    0.84
   4   1   1   21.33    0.60
  -5  -1  -1    0.18    0.28
  -5  -1  -1    0.37    0.34
   5   1   1    0.97    0.38
   5   1   1    0.57    0.20
  -6  -1  -1   66.88    2.06
  -6  -1  -1   67.57    1.83
   6   1   1   67.69    1.54
   6   1   1   70.64    2.12
  -7  -1  -1   49.66    1.61
  -7  -1  -1   48.34    1.83
   7   1   1   48.82    1.88
   7   1   1   47.96    1.31
  -8  -1  -1   40.45    1.79
  -8  -1  -1   38.63    1.48
   8   1   1   39.48    1.80
   8   1   1   40.57    1.26
  -9  -1  -1    0.96    0.57
  -9  -1  -1    0.35    0.33
   9   1   1   -0.51    0.44
   9   1   1   -0.40    0.22
 -10  -1  -1    0.22    0.38
 -10  -1  -1    0.14    0.55
  10   1   1    0.14    0.51
 -11  -1  -1    7.95    1.26
 -11  -1  -1    9.49    1.07
  11   1   1    7.62    1.22
 -12  -1  -1   21.97    2.05
  12   1   1   18.40    1.94
 -13  -1  -1   12.33    1.62
  13   1   1   15.20    1.88
 -14  -1  -1    3.09    1.12
  14   1   1    3.70    1.16
  13  -2  -1    3.47    1.09
 -13   2   1    3.27    1.19
  12  -2  -1    8.95    1.45
 -12   2   1    8.52    1.47
  11  -2  -1    6.29    1.19
 -11   2   1    5.80    1.27
  10  -2  -1    3.03    0.92
  10  -2  -1    4.73    0.80
 -10   2   1    4.38    1.09
   9  -2  -1    4.54    0.96
   9  -2  -1    4.77    0.77
  -9   2   1    6.01    1.10
   8  -2  -1    3.17    0.80
   8  -2  -1    3.36    0.64
  -8   2   1    3.19    0.82
  -8   2   1    2.90    0.53
   7  -2  -1   19.66    1.28
   7  -2  -1   21.81    1.18
  -7   2   1   24.14    1.47
  -7   2   1   22.53    1.00
   6  -2  -1   59.96    1.90
   6  -2  -1   56.05    1.98
  -6   2   1   55.49    2.08
  -6   2   1   58.90    1.57
   5  -2  -1    2.44    0.49
   5  -2  -1    1.38    0.47
  -5   2   1    2.13    0.37
  -5   2   1    2.45    0.60
   4  -2  -1    8.43    0.75
   4  -2  -1    6.83    0.71
  -4   2   1    8.14    0.86
  -4   2   1    7.20    0.49
   3  -2  -1   13.94    0.80
   3  -2  -1   14.09    0.78
  -3   2   1   14.99    0.91
  -3   2   1   14.08    0.58
   2  -2  -1    5.50    0.51
   2  -2  -1    5.88    0.53
  -2   2   1    5.67    0.58
  -2   2   1    5.83    0.39
   1  -2  -1  100.33    2.06
   1  -2  -1  101.03    1.93
  -1   2   1  102.97    2.13
  -1   2   1  102.82    1.80
   0  -2  -1   24.15    0.76
   0  -2  -1   24.83    0.76
   0  -2  -1   23.16    0.62
   0   2   1   24.49    0.65
  -1  -2  -1   40.16    0.97
  -1  -2  -1   40.66    0.91
  -1  -2  -1   43.13    0.93
  -1  -2  -1   40.90    0.98
  -2  -2  -1    7.85    0.47
  -2  -2  -1    6.88    0.29
  -2  -2  -1    6.79    0.47
   2   2   1    6.32    0.43
   2   2   1    6.98    0.28
  -3  -2  -1    1.27    0.34
  -3  -2  -1    0.89    0.33
   3   2   1    1.28    0.34
  -4  -2  -1    3.79    0.22
  -4  -2  -1    3.34    0.50
  -4  -2  -1    3.85    0.50
   4   2   1    3.99    0.54
   4   2   1    3.59    0.21
  -5  -2  -1   26.42    1.13
  -5  -2  -1   25.96    1.07
   5   2   1   27.20    1.17
   5   2   1   26.92    0.66
  -6  -2  -1    0.57    0.36
  -6  -2  -1    0.41    0.38
   6   2   1   -0.27    0.37
   6   2   1    0.13    0.17
  -7  -2  -1   16.31    0.99
  -7  -2  -1   16.24    1.07
   7   2   1   18.02    1.15
   7   2   1   17.12    0.65
  -8  -2  -1   -0.09    0.32
  -8  -2  -1    0.59    0.45
   8   2   1    0.01    0.41
   8   2   1    0.15    0.20
  -9  -2  -1    1.41    0.59
  -9  -2  -1    3.19    0.61
   9   2   1    1.54    0.65
   9   2   1    2.63    0.39
 -10  -2  -1    4.26    0.73
 -10  -2  -1    6.04    1.01
  10   2   1    4.61    0.91
 -11  -2  -1    0.44    0.62
 -11  -2  -1   -0.42    0.44
  11   2   1    0.34    0.63
 -12  -2  -1    1.47    0.79
 -12  -2  -1   -0.22    0.42
  12   2   1    0.78    0.76
 -13  -2  -1    2.69    0.97
  13   2   1    1.54    0.87
 -14  -2  -1    8.45    1.45
  14   2   1    7.08    1.39
  12  -3  -1   -0.43    0.76
 -12   3   1    0.62    0.95
  11  -3  -1   17.51    1.83
 -11   3   1   13.91    1.75
  10  -3  -1    5.51    1.10
  10  -3  -1    5.89    0.93
 -10   3   1    5.02    1.12
   9  -3  -1   40.50    2.10
   9  -3  -1   38.96    1.83
  -9   3   1   37.21    2.18
   8  -3  -1    5.23    0.84
   8  -3  -1    6.93    1.05
  -8   3   1    5.55    1.03
   7  -3  -1   10.47    1.13
   7  -3  -1   11.52    1.08
  -7   3   1   10.32    0.67
  -7   3   1   10.06    1.26
   6  -3  -1   15.11    1.05
   6  -3  -1   15.87    1.11
  -6   3   1   16.86    0.73
  -6   3   1   14.81    1.18
   5  -3  -1   54.69    1.86
   5  -3  -1   56.69    1.86
  -5   3   1   57.31    1.38
  -5   3   1   52.26    1.96
   4  -3  -1  110.21    2.67
   4  -3  -1  112.50    2.72
  -4   3   1  109.72    2.88
  -4   3   1  110.54    2.11
   3  -3  -1   10.23    0.73
   3  -3  -1   12.98    0.82
  -3   3   1   10.76    0.86
  -3   3   1   11.48    0.49
   2  -3  -1    2.39    0.45
   2  -3  -1    1.89    0.39
  -2   3   1    2.06    0.44
  -2   3   1    2.58    0.27
   1  -3  -1   19.15    0.75
  -1   3   1   18.92    0.60
  -1   3   1   16.73    0.86
   0  -3  -1  140.27    2.59
   0  -3  -1  140.53    2.74
   0   3   1  143.07    2.51
  -1  -3  -1   21.25    0.76
  -1  -3  -1   21.33    0.79
  -1  -3  -1   21.85    0.75
  -1  -3  -1   21.03    0.77
  -2  -3  -1   88.18    1.71
  -2  -3  -1   85.36    1.82
  -2  -3  -1   88.41    1.92
  -2  -3  -1   86.79    1.86
  -3  -3  -1    2.12    0.38
  -3  -3  -1    1.74    0.41
   3   3   1    2.46    0.27
   3   3   1    2.35    0.39
   3   3   1    1.53    0.34
  -4  -3  -1   61.13    1.62
  -4  -3  -1   61.11    1.71
   4   3   1   64.35    1.17
   4   3   1   62.47    1.72
  -5  -3  -1   48.27    1.53
  -5  -3  -1   49.73    1.59
   5   3   1   50.69    1.63
   5   3   1   52.25    0.98
  -6  -3  -1    4.59    0.65
  -6  -3  -1    4.84    0.65
   6   3   1    5.53    0.30
   6   3   1    6.51    0.77
  -7  -3  -1   12.03    0.96
  -7  -3  -1   16.96    1.05
   7   3   1   14.61    1.05
   7   3   1   13.33    0.50
  -8  -3  -1    4.87    0.78
  -8  -3  -1    4.98    0.73
   8   3   1    4.70    0.38
   8   3   1    4.60    0.80
  -9  -3  -1    3.68    0.74
  -9  -3  -1    5.19    0.80
   9   3   1    4.12    0.79
 -10  -3  -1   25.28    1.57
 -10  -3  -1   24.93    1.45
  10   3   1   28.59    1.73
 -11  -3  -1    9.18    1.10
 -11  -3  -1   12.73    1.36
  11   3   1   12.54    1.50
 -12  -3  -1   19.23    1.84
 -12  -3  -1   16.79    1.53
  12   3   1   16.34    1.77
 -13  -3  -1    2.24    0.73
 -13  -3  -1    1.42    0.80
  13   3   1    0.72    0.81
 -14  -3  -1    1.44    0.90
  14   3   1    1.56    0.95
 -15  -3  -1    1.29    0.90
  15   3   1    0.79    0.97
  12  -4  -1    4.39    1.10
 -12   4   1    8.19    1.57
  11  -4  -1    3.75    0.95
  11  -4  -1    4.97    1.17
 -11   4   1    3.39    1.20
  10  -4  -1    0.23    0.71
  10  -4  -1   -0.94    0.39
 -10   4   1    0.57    0.83
   9  -4  -1   17.75    1.68
   9  -4  -1   18.36    1.43
  -9   4   1   18.34    1.89
   8  -4  -1   16.45    1.55
   8  -4  -1   11.32    1.20
  -8   4   1   12.52    1.47
   7  -4  -1   31.42    1.65
   7  -4  -1   29.52    1.58
  -7   4   1   28.73    1.77
   6  -4  -1   11.79    1.11
   6  -4  -1   12.93    1.23
  -6   4   1   11.50    1.22
   5  -4  -1    2.59    0.58
   5  -4  -1    2.00    0.54
  -5   4   1    1.50    0.59
  -5   4   1    2.69    0.31
   4  -4  -1   54.94    1.81
   4  -4  -1   54.24    1.89
  -4   4   1   56.46    1.20
  -4   4   1   53.98    2.00
   3  -4  -1   41.00    1.47
   3  -4  -1   39.51    1.53
  -3   4   1   42.78    0.96
  -3   4   1   39.99    1.57
   2  -4  -1   72.63    1.91
   2  -4  -1   74.28    2.06
  -2   4   1   71.97    2.07
  -2   4   1   73.59    1.43
   1  -4  -1    0.02    0.26
   1  -4  -1   -0.31    0.30
  -1   4   1    0.01    0.33
  -1   4   1    0.21    0.20
   0  -4  -1    0.67    0.37
   0  -4  -1    0.73    0.32
   0   4   1    0.63    0.35
  -1  -4  -1    7.78    0.60
  -1  -4  -1    7.18    0.56
  -1  -4  -1    7.26    0.62
  -1  -4  -1    7.39    0.56
  -2  -4  -1   19.74    0.86
  -2  -4  -1   20.88    0.84
  -2  -4  -1   19.98    0.88
  -2  -4  -1   20.04    0.81
  -3  -4  -1    0.37    0.33
  -3  -4  -1    0.39    0.30
  -3  -4  -1    0.05    0.23
   3   4   1   -0.33    0.26
   3   4   1    0.02    0.27
  -4  -4  -1   45.50    1.49
  -4  -4  -1   43.30    1.32
   4   4   1   44.69    1.07
   4   4   1   43.37    1.40
   4   4   1   42.78    1.42
  -5  -4  -1    4.68    0.66
  -5  -4  -1    3.89    0.53
   5   4   1    2.33    0.47
   5   4   1    4.41    0.34
  -6  -4  -1    1.00    0.41
  -6  -4  -1    1.87    0.49
   6   4   1    2.05    0.54
   6   4   1    1.25    0.21
  -7  -4  -1   58.11    1.89
  -7  -4  -1   58.28    2.01
   7   4   1   58.30    2.05
   7   4   1   61.34    1.21
  -8  -4  -1   13.14    0.99
  -8  -4  -1   15.18    1.11
   8   4   1   15.33    0.52
   8   4   1   13.40    1.10
  -9  -4  -1   16.60    1.18
  -9  -4  -1   14.17    1.26
   9   4   1   15.81    1.28
 -10  -4  -1   -0.62    0.40
 -10  -4  -1   -0.55    0.46
  10   4   1    0.33    0.57
 -11  -4  -1   14.47    1.44
 -11  -4  -1   13.43    1.40
  11   4   1   17.07    1.65
 -12  -4  -1   19.34    1.74
 -12  -4  -1   16.84    1.59
  12   4   1   16.79    1.80
 -13  -4  -1    9.13    1.38
 -13  -4  -1   10.40    1.35
  13   4   1    9.91    1.55
 -14  -4  -1    0.75    0.79
 -14  -4  -1    2.30    0.85
  14   4   1   -0.12    0.85
 -15  -4  -1   -0.05    0.76
  15   4   1   -0.48    0.82
  11  -5  -1    4.48    0.99
  11  -5  -1    7.98    1.38
 -11   5   1    8.32    1.62
  10  -5  -1    4.22    0.97
  10  -5  -1    4.56    1.05
 -10   5   1    3.41    1.15
   9  -5  -1    0.40    0.59
   9  -5  -1    0.16    0.50
  -9   5   1    0.80    0.71
   8  -5  -1    7.51    1.12
   8  -5  -1   11.86    1.35
  -8   5   1    9.58    1.40
   7  -5  -1    6.97    0.99
   7  -5  -1    6.52    0.97
  -7   5   1    5.62    0.98
   6  -5  -1   15.75    1.25
   6  -5  -1   17.65    1.32
  -6   5   1   18.59    1.45
   5  -5  -1    2.49    0.64
   5  -5  -1    2.94    0.68
  -5   5   1    3.30    0.72
   4  -5  -1    0.04    0.38
   4  -5  -1    0.19    0.40
  -4   5   1   -0.19    0.41
  -4   5   1    0.00    0.13
   3  -5  -1   19.05    1.09
   3  -5  -1   19.31    1.16
  -3   5   1   18.76    1.19
  -3   5   1   20.60    0.59
   2  -5  -1    0.23    0.37
   2  -5  -1    0.26    0.33
  -2   5   1    0.54    0.44
  -2   5   1   -0.02    0.17
   1  -5  -1   22.72    1.04
   1  -5  -1   23.48    1.15
  -1   5   1   22.96    0.77
  -1   5   1   23.67    1.15
   0  -5  -1    2.96    0.54
   0  -5  -1    2.95    0.47
   0   5   1    3.44    0.54
  -1  -5  -1    4.12    0.55
  -1  -5  -1    4.30    0.54
  -1  -5  -1    2.95    0.54
  -1  -5  -1    3.88    0.48
  -2  -5  -1    9.94    0.69
  -2  -5  -1   10.48    0.69
  -2  -5  -1   11.40    0.75
  -2  -5  -1    8.65    0.68
  -3  -5  -1   11.63    0.81
  -3  -5  -1   12.40    0.79
  -3  -5  -1   11.77    0.70
  -3  -5  -1   10.50    0.70
  -4  -5  -1  144.54    3.00
  -4  -5  -1  139.78    3.22
   4   5   1  146.42    3.20
   4   5   1  144.10    2.79
   4   5   1  148.98    3.13
  -5  -5  -1    0.58    0.36
  -5  -5  -1    0.87    0.34
   5   5   1    0.39    0.23
   5   5   1    0.65    0.38
   5   5   1    0.10    0.33
  -6  -5  -1   31.79    1.24
  -6  -5  -1   28.17    1.36
   6   5   1   30.95    1.40
   6   5   1   29.48    0.86
  -7  -5  -1    2.82    0.64
  -7  -5  -1    2.10    0.52
   7   5   1    2.07    0.59
   7   5   1    2.15    0.28
  -8  -5  -1   44.96    1.88
  -8  -5  -1   44.68    1.73
   8   5   1   43.60    1.03
   8   5   1   45.59    1.92
  -9  -5  -1   26.96    1.43
  -9  -5  -1   25.39    1.50
   9   5   1   23.88    1.52
 -10  -5  -1    1.55    0.64
 -10  -5  -1    0.23    0.48
  10   5   1    0.18    0.54
 -11  -5  -1    9.55    1.24
 -11  -5  -1   10.03    1.19
  11   5   1   11.14    1.42
 -12  -5  -1   10.50    1.32
 -12  -5  -1    7.87    1.24
  12   5   1    9.07    1.40
 -13  -5  -1   18.58    1.78
 -13  -5  -1   18.16    1.77
  13   5   1   19.00    1.94
 -14  -5  -1    2.98    0.93
 -14  -5  -1    1.87    0.86
  14   5   1    5.43    1.40
 -15  -5  -1    1.91    0.93
 -15  -5  -1    0.82    0.78
  15   5   1    1.69    1.09
  11  -6  -1    3.09    1.04
  11  -6  -1    3.19    0.98
 -11   6   1    2.60    1.18
  10  -6  -1   41.06    2.42
  10  -6  -1   37.61    2.25
   9  -6  -1   16.39    1.70
   9  -6  -1   17.37    1.71
  -9   6   1   19.36    2.06
   8  -6  -1    1.56    0.65
   8  -6  -1    2.07    0.77
  -8   6   1    1.64    0.83
   7  -6  -1    6.66    1.06
   7  -6  -1    4.46    0.91
  -7   6   1    3.99    1.00
   6  -6  -1   14.25    1.39
   6  -6  -1   15.80    1.28
  -6   6   1   13.86    1.48
   5  -6  -1   91.32    2.83
   5  -6  -1   90.64    2.96
  -5   6   1   87.47    3.02
   4  -6  -1   11.97    1.12
   4  -6  -1   11.36    1.19
  -4   6   1   12.00    1.20
   3  -6  -1   39.96    1.77
   3  -6  -1   37.72    1.60
  -3   6   1   39.67    1.76
   2  -6  -1   -0.29    0.36
   2  -6  -1    0.78    0.41
  -2   6   1    0.83    0.47
  -2   6   1    0.37    0.22
   1  -6  -1   40.03    1.63
   1  -6  -1   39.45    1.48
  -1   6   1   41.51    1.64
  -1   6   1   41.60    1.13
   0  -6  -1   12.29    0.93
   0  -6  -1   12.48    0.85
   0   6   1   13.41    0.94
   0   6   1   11.96    0.67
  -1  -6  -1   18.39    0.88
  -1  -6  -1   18.63    1.04
  -1  -6  -1   17.07    0.95
  -2  -6  -1   39.43    1.40
  -2  -6  -1   39.58    1.39
  -2  -6  -1   38.04    1.42
  -2  -6  -1   38.16    1.35
  -3  -6  -1    4.06    0.59
  -3  -6  -1    5.30    0.61
  -3  -6  -1    4.17    0.57
  -3  -6  -1    4.04    0.61
  -4  -6  -1   95.61    2.31
  -4  -6  -1   95.90    2.55
   4   6   1   94.20    2.24
  -5  -6  -1  113.30    2.95
  -5  -6  -1  112.55    2.62
   5   6   1  112.22    2.90
   5   6   1  113.72    2.43
   5   6   1  110.65    2.77
  -6  -6  -1   66.21    2.22
  -6  -6  -1   65.53    1.92
   6   6   1   69.13    1.65
   6   6   1   66.16    2.19
  -7  -6  -1    0.45    0.39
  -7  -6  -1    1.09    0.53
   7   6   1    0.87    0.48
   7   6   1    1.25    0.28
  -8  -6  -1   -0.13    0.34
  -8  -6  -1    0.19    0.45
   8   6   1    0.07    0.20
   8   6   1    0.88    0.54
  -9  -6  -1   14.43    1.40
  -9  -6  -1   13.10    1.21
   9   6   1   12.91    1.37
 -10  -6  -1   20.29    1.49
 -10  -6  -1   18.86    1.32
  10   6   1   19.01    1.49
 -11  -6  -1   14.55    1.40
 -11  -6  -1   15.52    1.56
  11   6   1   18.86    1.76
 -12  -6  -1    0.06    0.58
 -12  -6  -1    0.49    0.59
  12   6   1    0.44    0.73
 -13  -6  -1    3.79    1.00
 -13  -6  -1    1.37    0.72
  13   6   1    3.13    1.03
 -14  -6  -1   11.46    1.59
 -14  -6  -1    9.28    1.36
  14   6   1    8.30    1.52
 -15  -6  -1    6.72    1.33
  15   6   1    9.12    1.65
  10  -7  -1   -0.22    0.65
  10  -7  -1    0.73    0.82
 -10   7   1    0.28    0.81
   9  -7  -1    2.91    0.96
   9  -7  -1    5.92    1.19
  -9   7   1    0.92    0.87
   8  -7  -1    3.40    0.95
   8  -7  -1    5.53    1.10
  -8   7   1    3.86    1.08
   7  -7  -1    2.46    0.88
   7  -7  -1    2.02    0.73
  -7   7   1    1.60    0.85
   6  -7  -1   14.15    1.43
   6  -7  -1   15.26    1.53
  -6   7   1   10.90    1.39
   5  -7  -1    0.44    0.54
   5  -7  -1   -0.14    0.46
  -5   7   1   -0.53    0.47
   4  -7  -1   11.43    1.20
   4  -7  -1   12.21    1.28
  -4   7   1   14.82    1.49
   3  -7  -1   17.46    1.18
   3  -7  -1   15.08    1.23
  -3   7   1   17.48    1.33
   2  -7  -1   32.10    1.49
   2  -7  -1   34.29    1.66
  -2   7   1   31.31    1.62
  -2   7   1   33.12    0.94
   1  -7  -1   12.09    0.93
   1  -7  -1   12.51    1.18
  -1   7   1    9.78    1.01
  -1   7   1   11.12    0.62
   0  -7  -1    0.74    0.42
   0  -7  -1   -0.25    0.33
   0   7   1   -0.07    0.25
   0   7   1   -0.86    0.29
  -1  -7  -1   51.09    1.76
  -1  -7  -1   51.97    1.58
  -1  -7  -1   49.17    1.81
   1   7   1   52.61    1.81
  -2  -7  -1   11.03    0.89
  -2  -7  -1   10.09    0.82
  -2  -7  -1   10.73    0.81
  -2  -7  -1   11.16    0.88
  -3  -7  -1   33.95    1.42
  -3  -7  -1   37.11    1.37
  -3  -7  -1   34.22    1.45
  -3  -7  -1   34.98    1.41
  -4  -7  -1    0.10    0.32
  -4  -7  -1   -0.13    0.35
  -4  -7  -1   -0.12    0.34
  -5  -7  -1   13.42    1.03
  -5  -7  -1   13.59    0.88
   5   7   1   13.84    1.02
   5   7   1   12.05    0.97
   5   7   1   12.15    0.79
  -6  -7  -1   23.79    1.16
  -6  -7  -1   22.59    1.36
   6   7   1   23.70    1.00
   6   7   1   27.21    1.42
   6   7   1   26.51    1.37
  -7  -7  -1   14.11    0.96
  -7  -7  -1   13.15    1.25
   7   7   1   14.43    0.76
   7   7   1   12.95    1.25
  -8  -7  -1   30.31    1.68
  -8  -7  -1   27.23    1.35
   8   7   1   30.61    1.68
  -9  -7  -1   -0.40    0.41
  -9  -7  -1   -0.13    0.40
   9   7   1    0.67    0.57
 -10  -7  -1    0.85    0.51
 -10  -7  -1    0.61    0.65
  10   7   1    0.68    0.65
 -11  -7  -1    3.03    0.72
 -11  -7  -1    1.56    0.76
  11   7   1    1.51    0.82
 -12  -7  -1    8.53    1.17
 -12  -7  -1   12.04    1.52
  12   7   1    9.96    1.41
 -13  -7  -1    7.76    1.34
 -13  -7  -1    7.91    1.17
  13   7   1   10.28    1.57
 -14  -7  -1    1.07    0.84
  14   7   1   -1.29    0.77
 -15  -7  -1    2.33    1.07
  15   7   1    2.08    1.17
   9  -8  -1   -0.50    0.64
   9  -8  -1    0.94    0.80
  -9   8   1    0.11    0.77
   8  -8  -1    3.07    0.99
   8  -8  -1    2.50    0.89
  -8   8   1    1.76    1.01
   7  -8  -1   10.88    1.47
   7  -8  -1    7.64    1.19
  -7   8   1    8.66    1.47
   6  -8  -1   28.50    1.80
   6  -8  -1   25.75    1.90
  -6   8   1   24.40    1.93
   5  -8  -1   17.35    1.66
   5  -8  -1   17.20    1.42
  -5   8   1   14.85    1.60
   4  -8  -1   -0.40    0.45
   4  -8  -1    0.30    0.61
  -4   8   1    0.39    0.60
   3  -8  -1    0.48    0.54
   3  -8  -1    0.94    0.60
  -3   8   1    1.57    0.67
   2  -8  -1   75.33    2.71
   2  -8  -1   79.98    2.59
  -2   8   1   80.98    2.80
   1  -8  -1   40.45    1.87
   1  -8  -1   39.55    1.73
  -1   8   1   40.95    1.25
  -1   8   1   46.20    1.95
   0  -8  -1   12.72    0.99
   0  -8  -1   12.90    1.24
   0   8   1   12.61    0.79
   0   8   1   13.48    1.11
  -1  -8  -1    1.65    0.57
  -1  -8  -1    2.02    0.46
  -1  -8  -1    1.69    0.54
   1   8   1    2.71    0.60
  -2  -8  -1   11.30    0.87
  -2  -8  -1   12.23    1.14
  -2  -8  -1    9.39    0.93
   2   8   1   11.56    0.91
  -3  -8  -1   47.41    1.83
  -3  -8  -1   48.22    1.81
  -3  -8  -1   47.41    1.72
  -3  -8  -1   48.31    1.78
  -4  -8  -1   21.61    1.25
  -4  -8  -1   21.55    1.27
  -4  -8  -1   20.59    1.11
  -5  -8  -1    8.92    0.99
  -5  -8  -1    8.79    0.85
   5   8   1    8.29    0.83
  -6  -8  -1    3.38    0.74
  -6  -8  -1    2.38    0.54
   6   8   1    2.42    0.62
   6   8   1    2.36    0.65
   6   8   1    2.87    0.52
  -7  -8  -1   16.57    1.31
  -7  -8  -1   18.52    1.12
   7   8   1   18.72    0.96
   7   8   1   17.23    1.29
   7   8   1   18.24    1.33
  -8  -8  -1   35.57    1.57
  -8  -8  -1   34.02    1.86
   8   8   1   33.01    1.81
  -9  -8  -1   17.02    1.18
  -9  -8  -1   15.55    1.54
   9   8   1   16.28    1.59
 -10  -8  -1   58.72    2.65
 -10  -8  -1   64.94    2.35
  10   8   1   57.86    2.61
 -11  -8  -1   -0.03    0.60
 -11  -8  -1    0.77    0.58
  11   8   1   -0.19    0.60
 -12  -8  -1    1.12    0.69
 -12  -8  -1    1.79    0.87
  12   8   1    2.43    0.99
 -13  -8  -1   21.45    2.10
  13   8   1   20.48    2.05
 -14  -8  -1   15.63    1.86
  14   8   1   16.09    1.99
   8  -9  -1   15.49    1.86
   8  -9  -1   14.45    1.72
  -8   9   1   12.32    1.77
   7  -9  -1   -0.36    0.58
   7  -9  -1   -0.37    0.69
  -7   9   1   -1.18    0.69
   6  -9  -1    0.88    0.69
   6  -9  -1    0.42    0.70
  -6   9   1    0.25    0.76
   5  -9  -1   11.00    1.35
   5  -9  -1   10.65    1.39
  -5   9   1    7.73    1.30
   4  -9  -1   13.71    1.53
   4  -9  -1   13.44    1.42
  -4   9   1   13.06    1.59
   3  -9  -1    4.33    0.88
   3  -9  -1    2.49    0.78
  -3   9   1    3.21    0.90
   2  -9  -1    0.99    0.65
   2  -9  -1    1.98    0.63
  -2   9   1    1.43    0.73
   1  -9  -1    4.77    0.94
   1  -9  -1    5.18    0.87
  -1   9   1    5.31    0.94
   0  -9  -1   87.31    2.95
   0  -9  -1   91.59    2.81
   0   9   1   93.29    2.32
   0   9   1   91.97    2.93
  -1  -9  -1   26.28    1.49
  -1  -9  -1   25.21    1.53
   1   9   1   25.25    1.49
  -2  -9  -1   21.32    1.37
  -2  -9  -1   19.73    1.27
  -2  -9  -1   20.57    1.18
   2   9   1   19.16    1.23
  -3  -9  -1    2.03    0.59
  -3  -9  -1    1.50    0.55
  -3  -9  -1    1.42    0.58
  -4  -9  -1   -0.35    0.34
  -4  -9  -1    0.34    0.47
  -4  -9  -1   -0.90    0.36
  -5  -9  -1   80.66    2.68
  -5  -9  -1   77.63    2.61
  -5  -9  -1   78.01    2.35
   5   9   1   82.33    2.46
  -6  -9  -1   13.10    0.98
  -6  -9  -1   11.63    1.25
   6   9   1   12.70    1.32
   6   9   1   11.86    0.93
   6   9   1   13.08    1.26
  -7  -9  -1   56.76    1.96
  -7  -9  -1   49.52    2.23
   7   9   1   54.33    2.24
   7   9   1   56.09    1.84
   7   9   1   55.32    2.31
  -8  -9  -1   -0.19    0.39
  -8  -9  -1   -0.15    0.53
   8   9   1    0.29    0.53
  -9  -9  -1   22.54    1.35
  -9  -9  -1   17.04    1.66
   9   9   1   20.62    1.88
 -10  -9  -1   24.43    1.50
 -10  -9  -1   24.73    1.82
  10   9   1   22.84    1.75
 -11  -9  -1    8.19    1.37
  11   9   1    8.54    1.39
 -12  -9  -1   10.34    1.54
  12   9   1   11.65    1.59
 -13  -9  -1    0.28    0.82
  13   9   1    1.44    0.90
 -14  -9  -1    3.20    1.15
  14   9   1    2.52    1.14
   7 -10  -1    4.48    1.22
  -7  10   1    3.47    1.21
   6 -10  -1    3.34    0.95
   6 -10  -1    0.98    0.87
  -6  10   1    1.22    0.88
   5 -10  -1    8.51    1.28
   5 -10  -1    7.09    1.31
  -5  10   1    5.72    1.23
   4 -10  -1    4.34    1.01
   4 -10  -1    4.28    1.10
  -4  10   1    2.31    0.91
   3 -10  -1   11.06    1.46
   3 -10  -1   13.41    1.49
  -3  10   1   13.16    1.56
   2 -10  -1    1.40    0.70
   2 -10  -1    1.48    0.74
  -2  10   1    1.72    0.78
   1 -10  -1    9.01    1.25
   1 -10  -1    9.63    1.15
  -1  10   1    8.36    1.19
   0 -10  -1    0.54    0.58
   0 -10  -1    0.62    0.56
   0  10   1    0.76    0.62
  -1 -10  -1   -0.52    0.47
  -1 -10  -1    0.37    0.51
   1  10   1   -0.22    0.47
   1  10   1    0.63    0.43
  -2 -10  -1   12.91    1.05
  -2 -10  -1   13.84    1.36
  -2 -10  -1   12.97    1.28
   2  10   1   12.47    1.26
  -3 -10  -1    4.04    0.74
  -3 -10  -1    4.58    0.86
  -3 -10  -1    4.10    0.85
   3  10   1    3.70    0.76
  -4 -10  -1    0.21    0.48
  -4 -10  -1   -0.62    0.41
  -4 -10  -1    0.15    0.45
   4  10   1    0.34    0.49
  -5 -10  -1    0.81    0.63
  -5 -10  -1    0.25    0.53
  -5 -10  -1    0.13    0.43
   5  10   1    1.77    0.60
  -6 -10  -1   75.15    2.38
  -6 -10  -1   71.70    2.71
   6  10   1   74.37    2.67
   6  10   1   73.97    2.45
   6  10   1   71.73    2.70
  -7 -10  -1   43.56    2.17
  -7 -10  -1   45.66    1.86
   7  10   1   46.18    2.24
   7  10   1   50.55    2.22
   7  10   1   45.13    1.78
  -8 -10  -1   11.64    1.11
  -8 -10  -1    9.98    1.29
   8  10   1   11.67    1.42
   8  10   1   12.86    1.45
  -9 -10  -1    5.17    1.04
   9  10   1    5.96    1.13
 -10 -10  -1    0.86    0.75
  10  10   1    0.79    0.83
 -11 -10  -1    3.77    1.03
  11  10   1    5.33    1.24
 -12 -10  -1   15.90    1.84
  12  10   1   15.94    1.93
 -13 -10  -1    1.43    0.97
  13  10   1    1.48    1.01
 -14 -10  -1    1.40    1.14
  14  10   1    2.10    1.09
   5 -11  -1    9.81    1.55
   5 -11  -1   13.96    1.65
  -5  11   1   11.78    1.76
   4 -11  -1    5.68    1.14
   4 -11  -1    1.61    0.97
  -4  11   1    5.96    1.42
   3 -11  -1    8.25    1.39
   3 -11  -1    5.36    1.10
  -3  11   1    6.66    1.31
   2 -11  -1    5.97    1.10
   2 -11  -1    4.61    1.14
  -2  11   1    3.85    1.05
   1 -11  -1   40.41    2.14
  -1  11   1   42.74    2.31
   0 -11  -1   30.93    1.97
   0 -11  -1   34.07    1.94
   0  11   1   30.68    1.94
  -1 -11  -1    1.21    0.68
  -1 -11  -1    0.04    0.56
   1  11   1    0.59    0.58
  -2 -11  -1    7.16    1.13
  -2 -11  -1    7.43    1.08
   2  11   1    6.69    1.00
  -3 -11  -1   18.13    1.45
  -3 -11  -1   16.50    1.24
   3  11   1   14.46    1.41
  -4 -11  -1   31.52    1.82
  -4 -11  -1   32.66    1.74
   4  11   1   33.84    1.73
   4  11   1   35.03    1.91
  -5 -11  -1   12.74    1.22
  -5 -11  -1   14.55    1.41
  -5 -11  -1   15.18    1.52
   5  11   1   13.21    1.34
  -6 -11  -1   28.15    1.53
  -6 -11  -1   26.90    1.75
   6  11   1   27.12    1.59
   6  11   1   28.10    1.77
   6  11   1   28.76    1.74
  -7 -11  -1    4.50    0.98
   7  11   1    3.38    0.87
   7  11   1    4.18    0.96
   7  11   1    3.84    0.76
  -8 -11  -1   19.92    1.83
   8  11   1   22.00    1.68
   8  11   1   21.77    1.72
  -9 -11  -1   62.76    2.89
   9  11   1   64.33    2.89
 -10 -11  -1    6.85    1.31
  10  11   1    6.44    1.26
 -11 -11  -1    8.35    1.46
  11  11   1    7.35    1.35
 -12 -11  -1    0.31    0.86
  12  11   1    0.40    0.90
 -13 -11  -1   14.01    1.96
  13  11   1   10.49    1.68
   4 -12  -1    3.49    1.10
  -4  12   1    4.77    1.28
   3 -12  -1   -0.22    0.76
   3 -12  -1    0.63    0.78
  -3  12   1    2.26    1.05
   2 -12  -1    3.12    1.04
   2 -12  -1    6.23    1.18
  -2  12   1    7.18    1.33
   1 -12  -1    4.11    1.10
   1 -12  -1    3.49    0.97
  -1  12   1    4.19    1.09
   0 -12  -1   16.22    1.79
   0 -12  -1   12.37    1.48
   0  12   1   14.03    1.60
  -1 -12  -1   18.36    1.75
  -1 -12  -1   18.34    1.81
   1  12   1   20.32    1.66
  -2 -12  -1    8.23    1.18
  -2 -12  -1    4.49    1.05
   2  12   1    5.89    1.03
  -3 -12  -1    3.25    0.87
   3  12   1    5.40    0.97
  -4 -12  -1    7.21    1.09
  -4 -12  -1    9.59    1.27
   4  12   1    6.99    1.15
   4  12   1    9.76    1.18
  -5 -12  -1    2.50    0.84
  -5 -12  -1    1.71    0.73
   5  12   1    1.86    0.76
   5  12   1    2.32    0.76
  -6 -12  -1   32.12    1.96
   6  12   1   31.76    1.84
  -7 -12  -1    1.23    0.77
   7  12   1    2.57    0.85
   7  12   1    2.59    0.91
  -8 -12  -1    0.09    0.73
   8  12   1   -0.66    0.57
   8  12   1    0.16    0.71
  -9 -12  -1    4.32    1.13
   9  12   1    5.04    1.17
 -10 -12  -1   14.79    1.78
  10  12   1    9.38    1.46
 -11 -12  -1   28.25    2.55
  11  12   1   27.03    2.56
 -12 -12  -1    2.80    1.09
  12  12   1    2.77    1.17
   2 -13  -1    3.65    1.21
  -2  13   1    5.66    1.37
   1 -13  -1    0.89    0.80
   1 -13  -1    0.16    0.84
  -1  13   1   -0.97    0.69
   0 -13  -1    2.80    1.01
   0 -13  -1    2.37    0.91
   0  13   1    4.03    1.13
  -1 -13  -1   29.00    2.17
  -1 -13  -1   30.58    2.02
   1  13   1   27.60    2.02
  -2 -13  -1   13.42    1.54
   2  13   1   20.60    1.70
  -3 -13  -1   16.81    1.73
   3  13   1   15.49    1.75
  -4 -13  -1    0.59    0.71
   4  13   1    1.07    0.77
  -5 -13  -1    0.92    0.79
  -5 -13  -1    0.48    0.69
   5  13   1    1.55    0.75
  -6 -13  -1   20.26    1.82
   6  13   1   17.53    1.69
  -7 -13  -1   12.44    1.56
   7  13   1   11.27    1.53
   7  13   1   11.01    1.45
  -8 -13  -1   35.75    2.28
   8  13   1   36.00    2.24
   8  13   1   37.57    2.35
  -9 -13  -1   -0.02    0.69
   9  13   1   -0.14    0.71
   9  13   1    0.74    0.81
 -10 -13  -1    1.17    0.92
  10  13   1    1.20    0.93
 -11 -13  -1    9.30    1.59
  11  13   1   10.99    1.71
   0  14   1    8.96    1.53
  -1 -14  -1    1.49    0.93
  -2 -14  -1    0.34    0.76
   2  14   1   -0.35    0.69
  -3 -14  -1   14.18    1.75
   3  14   1   14.62    1.80
  -4 -14  -1    4.43    1.10
   4  14   1    6.04    1.28
  -5 -14  -1   27.41    2.09
   5  14   1   25.36    2.02
   6  14   1    0.96    0.75
  -7 -14  -1   -0.56    0.67
   7  14   1    1.85    0.91
   7  14   1    1.08    0.83
  -8 -14  -1   13.85    1.74
   8  14   1   16.33    1.92
   8  14   1   15.59    1.76
  -9 -14  -1    9.84    1.64
   9  14   1    8.56    1.53
   9  14   1    8.00    1.45
   8  13  -2    3.27    1.07
   8  13  -2    1.02    0.89
  -8 -13   2    1.62    0.99
   7  13  -2   14.55    1.87
   7  13  -2   13.02    1.69
  -7 -13   2   12.68    1.68
   6  13  -2    9.20    1.41
  -6 -13   2    4.81    1.22
  -6 -13   2    9.84    1.48
   5  13  -2   12.97    1.64
  -5 -13   2   13.43    1.83
   4  13  -2    5.23    1.18
  -4 -13   2    5.13    1.18
   3  13  -2   -0.39    0.76
  -3 -13   2   -0.34    0.68
   2  13  -2    3.88    1.19
  -2 -13   2    5.08    1.24
   1  13  -2    1.85    0.98
  -1 -13   2    3.86    1.15
   0  13  -2   13.45    1.89
   0 -13   2   13.52    1.77
  10  12  -2    2.88    1.06
 -10 -12   2    4.95    1.25
   9  12  -2   12.71    1.81
   9  12  -2    8.22    1.49
  -9 -12   2    7.81    1.42
   8  12  -2   13.36    1.69
   8  12  -2   14.82    1.90
  -8 -12   2   12.46    1.65
   7  12  -2   -0.27    0.72
   7  12  -2    0.28    0.80
  -7 -12   2    1.08    0.80
   6  12  -2    4.67    1.02
  -6 -12   2    6.52    1.21
  -6 -12   2    4.59    1.14
   5  12  -2    9.73    1.37
  -5 -12   2   10.79    1.41
  -5 -12   2    8.87    1.40
   4  12  -2    1.43    0.80
  -4 -12   2    2.27    0.93
   3  12  -2   20.15    1.97
  -3 -12   2   23.40    1.90
   2  12  -2    3.40    1.05
  -2 -12   2    6.02    1.21
   1  12  -2    0.51    0.78
  -1 -12   2   -0.55    0.68
   0  12  -2    5.29    1.22
   0 -12   2    7.33    1.40
  -1  12  -2    2.43    1.11
   1 -12   2    2.67    1.03
  -2  12  -2   10.72    1.66
   2 -12   2   13.04    1.68
  -3  12  -2    2.66    1.09
   3 -12   2    1.60    0.96
  11  11  -2   10.86    1.65
 -11 -11   2   11.68    1.76
  10  11  -2    4.42    1.30
 -10 -11   2    5.02    1.28
   9  11  -2    0.36    0.78
   9  11  -2   -0.84    0.71
  -9 -11   2    0.99    0.83
   8  11  -2   17.58    1.85
   8  11  -2   18.69    2.01
  -8 -11   2   16.94    1.81
   7  11  -2   11.15    1.32
   7  11  -2    9.94    1.41
   7  11  -2   11.80    1.48
  -7 -11   2   11.46    1.52
   6  11  -2    4.18    0.89
  -6 -11   2    3.10    0.91
  -6 -11   2    1.81    0.84
   5  11  -2    0.55    0.59
  -5 -11   2   -0.18    0.64
  -5 -11   2    0.31    0.68
   4  11  -2    0.46    0.65
  -4 -11   2    0.37    0.67
  -4 -11   2   -0.52    0.54
   3  11  -2   10.12    1.39
  -3 -11   2    7.24    1.22
   2  11  -2   12.54    1.58
  -2 -11   2   14.48    1.62
   1  11  -2    3.46    1.00
  -1 -11   2    4.04    1.04
   0  11  -2   -0.01    0.66
   0 -11   2    0.25    0.73
  -1  11  -2    0.80    0.70
  -1  11  -2    1.33    0.81
   1 -11   2    2.49    0.85
  -2  11  -2   15.67    1.65
  -2  11  -2   15.30    1.93
   2 -11   2   16.56    1.76
  -3  11  -2    6.54    1.39
  -3  11  -2    4.09    1.04
   3 -11   2    4.92    1.15
  -4  11  -2   11.25    1.74
  -4  11  -2   10.91    1.55
   4 -11   2   10.28    1.54
  -5  11  -2   -0.13    0.83
   5 -11   2   -0.26    0.78
  12  10  -2    1.39    1.03
 -12 -10   2    3.91    1.19
  11  10  -2    8.86    1.59
 -11 -10   2    8.99    1.48
  10  10  -2   12.92    1.73
 -10 -10   2   14.41    1.84
   9  10  -2    7.09    1.36
   9  10  -2   10.11    1.49
  -9 -10   2    7.81    1.36
   8  10  -2    7.74    1.26
   8  10  -2    5.23    1.16
  -8 -10   2    7.53    1.30
   7  10  -2    0.10    0.65
   7  10  -2    2.67    0.71
   7  10  -2    2.75    0.82
  -7 -10   2    3.60    0.93
   6  10  -2   15.95    1.31
  -6 -10   2   17.63    1.74
  -6 -10   2   16.93    1.64
   5  10  -2    7.54    1.08
  -5 -10   2    7.95    1.26
  -5 -10   2    8.86    1.20
   4  10  -2   16.27    1.54
  -4 -10   2   16.72    1.35
  -4 -10   2   11.51    1.37
   3  10  -2    2.25    0.79
  -3 -10   2    1.49    0.77
  -3 -10   2    1.71    0.63
   2  10  -2    0.90    0.68
  -2 -10   2    0.05    0.48
  -2 -10   2    0.49    0.64
   1  10  -2   28.02    1.51
   1  10  -2   27.79    1.87
  -1 -10   2   26.19    1.81
   0  10  -2    1.30    0.60
   0  10  -2    1.72    0.76
   0 -10   2    2.00    0.80
  -1  10  -2    3.74    1.00
  -1  10  -2    4.64    0.91
   1 -10   2    3.85    0.93
  -2  10  -2    1.22    0.76
  -2  10  -2   -0.40    0.56
   2 -10   2   -0.23    0.67
  -3  10  -2    2.74    0.89
   3 -10   2    1.48    0.87
  -4  10  -2   24.94    1.90
   4 -10   2   26.20    1.98
  -5  10  -2   13.99    1.75
   5 -10   2   14.46    1.74
   5 -10   2   16.72    1.98
  -6  10  -2    7.33    1.41
   6 -10   2    8.85    1.47
   6 -10   2    6.09    1.43
  13   9  -2   -1.12    0.81
 -13  -9   2    0.32    0.84
  12   9  -2    6.77    1.44
 -12  -9   2    5.09    1.31
  11   9  -2    4.09    1.26
 -11  -9   2    4.98    1.21
  10   9  -2    2.56    0.98
 -10  -9   2    2.34    0.94
   9   9  -2   17.59    1.78
  -9  -9   2   17.53    1.88
   8   9  -2    1.61    0.78
   8   9  -2    0.51    0.70
  -8  -9   2    1.76    0.82
   7   9  -2    1.52    0.78
   7   9  -2    0.64    0.65
   7   9  -2    0.51    0.49
  -7  -9   2    0.42    0.68
   6   9  -2   16.57    1.26
  -6  -9   2   17.04    1.56
   5   9  -2    4.70    0.85
  -5  -9   2    4.99    0.91
  -5  -9   2    4.12    0.87
   4   9  -2   26.17    1.59
  -4  -9   2   27.01    1.59
  -4  -9   2   26.95    1.73
   3   9  -2    8.35    1.14
   3   9  -2    9.55    0.89
  -3  -9   2   10.32    1.10
  -3  -9   2    9.20    1.19
   2   9  -2    0.81    0.54
   2   9  -2    0.66    0.39
  -2  -9   2    0.34    0.43
  -2  -9   2    0.01    0.52
   1   9  -2    7.80    0.92
   1   9  -2    6.81    1.07
  -1  -9   2    8.74    0.91
  -1  -9   2    6.22    1.01
   0   9  -2    5.99    1.07
   0   9  -2    6.56    0.90
   0  -9   2    8.03    1.16
  -1   9  -2   28.65    1.84
  -1   9  -2   24.46    1.52
   1  -9   2   22.93    1.64
  -2   9  -2    0.34    0.58
   2  -9   2   -0.78    0.48
  -3   9  -2    0.79    0.73
   3  -9   2    2.13    0.85
   3  -9   2    1.68    0.80
  -4   9  -2    0.53    0.72
   4  -9   2    0.35    0.72
   4  -9   2    1.65    0.78
  -5   9  -2    2.06    0.94
   5  -9   2    1.52    0.80
   5  -9   2    2.56    0.96
  -6   9  -2   18.40    1.99
   6  -9   2   21.27    2.08
   6  -9   2   19.48    2.07
  -7   9  -2   -0.20    0.89
   7  -9   2   -0.18    0.79
   7  -9   2   -0.33    0.75
  13   8  -2   20.52    2.25
 -13  -8   2   17.76    2.06
  12   8  -2   19.86    2.18
 -12  -8   2   15.65    1.88
  11   8  -2    6.53    1.33
 -11  -8   2    6.81    1.23
  10   8  -2    1.91    0.94
 -10  -8   2    2.00    0.88
   9   8  -2    6.34    1.15
  -9  -8   2    4.80    1.10
   8   8  -2   21.31    1.66
   8   8  -2   22.05    1.66
   8   8  -2   22.77    1.29
  -8  -8   2   21.20    1.63
   7   8  -2    2.61    0.80
   7   8  -2    2.49    0.77
   7   8  -2    2.49    0.59
  -7  -8   2    3.02    0.83
   6   8  -2    8.34    0.97
   6   8  -2    6.24    0.94
   6   8  -2    7.95    1.06
  -6  -8   2    7.21    1.05
   5   8  -2    2.49    0.60
  -5  -8   2    1.02    0.65
  -5  -8   2    2.11    0.67
   4   8  -2    0.10    0.42
   4   8  -2    0.26    0.30
  -4  -8   2   -0.02    0.43
  -4  -8   2    0.67    0.55
   3   8  -2   17.62    1.25
   3   8  -2   17.38    0.95
  -3  -8   2   18.21    1.34
  -3  -8   2   16.07    1.16
   2   8  -2   59.49    2.29
   2   8  -2   56.94    1.81
  -2  -8   2   56.73    2.25
  -2  -8   2   55.81    1.97
   1   8  -2    0.64    0.39
   1   8  -2    1.67    0.63
  -1  -8   2    0.34    0.53
  -1  -8   2    1.26    0.48
   0   8  -2    0.17    0.39
   0   8  -2    0.19    0.52
   0  -8   2   -0.20    0.31
   0  -8   2    0.58    0.53
  -1   8  -2   16.47    1.17
   1  -8   2   16.09    1.32
  -2   8  -2    0.31    0.53
   2  -8   2    1.40    0.65
   2  -8   2    0.29    0.55
  -3   8  -2   27.88    1.68
   3  -8   2   28.85    1.82
   3  -8   2   28.08    1.78
  -4   8  -2    7.26    1.15
   4  -8   2   10.33    1.30
   4  -8   2    7.22    1.14
  -5   8  -2    0.42    0.70
   5  -8   2    1.24    0.71
   5  -8   2    1.12    0.73
  -6   8  -2    6.82    1.31
   6  -8   2    4.96    1.09
   6  -8   2    6.26    1.21
  -7   8  -2   11.83    1.62
   7  -8   2   11.18    1.50
   7  -8   2   12.22    1.52
  -8   8  -2   11.31    1.67
   8  -8   2   13.44    1.68
   8  -8   2   16.57    1.81
  -9   8  -2    7.09    1.50
   9  -8   2    5.36    1.24
   9  -8   2    7.29    1.38
  14   7  -2    0.74    1.01
 -14  -7   2   -0.36    0.78
  13   7  -2    2.88    1.15
 -13  -7   2    2.93    1.10
  12   7  -2    4.98    1.28
 -12  -7   2    7.15    1.34
  11   7  -2   25.78    1.98
 -11  -7   2   27.75    2.05
  10   7  -2   31.04    2.04
 -10  -7   2   27.92    1.97
   9   7  -2    1.07    0.67
  -9  -7   2    0.52    0.65
   8   7  -2    3.49    0.61
   8   7  -2    2.53    0.78
  -8  -7   2    4.33    0.91
   7   7  -2   41.78    1.61
   7   7  -2   38.43    1.93
   7   7  -2   42.64    2.06
  -7  -7   2   43.60    2.08
   6   7  -2   20.56    1.42
   6   7  -2   21.95    1.44
   6   7  -2   20.89    1.18
  -6  -7   2   20.42    1.42
  -6  -7   2   21.12    0.94
   5   7  -2   31.54    1.43
  -5  -7   2   28.72    1.60
  -5  -7   2   27.92    1.04
  -5  -7   2   29.39    1.56
   4   7  -2    3.06    0.63
  -4  -7   2    2.76    0.63
  -4  -7   2    2.65    0.43
  -4  -7   2    2.22    0.67
   3   7  -2    2.60    0.44
   3   7  -2    3.89    0.71
  -3  -7   2    3.03    0.62
  -3  -7   2    2.97    0.65
   2   7  -2   29.95    1.16
   2   7  -2   30.37    1.52
  -2  -7   2   30.21    1.36
  -2  -7   2   28.42    1.51
   1   7  -2    4.52    0.80
   1   7  -2    4.27    0.57
  -1  -7   2    4.21    0.75
  -1  -7   2    4.37    0.62
   0   7  -2   13.65    0.93
   0   7  -2   10.81    1.10
   0  -7   2   13.36    1.26
   0  -7   2   13.77    0.83
  -1   7  -2   14.07    1.04
   1  -7   2   12.76    1.25
   1  -7   2   12.33    1.23
   1  -7   2   13.18    0.72
  -2   7  -2    0.24    0.47
   2  -7   2    0.94    0.55
   2  -7   2    0.17    0.48
  -3   7  -2    2.47    0.71
   3  -7   2    2.03    0.69
   3  -7   2    1.87    0.67
  -4   7  -2    4.96    0.93
   4  -7   2    4.58    0.93
   4  -7   2    4.51    0.92
  -5   7  -2    4.23    0.99
   5  -7   2    4.89    0.99
   5  -7   2    5.32    1.04
  -6   7  -2    3.38    0.93
   6  -7   2    1.78    0.76
   6  -7   2    3.14    0.90
  -7   7  -2   -0.08    0.75
   7  -7   2    1.27    0.79
   7  -7   2    2.15    0.83
  -8   7  -2    0.88    0.89
   8  -7   2    0.85    0.74
   8  -7   2    0.39    0.76
  -9   7  -2    4.62    1.25
   9  -7   2    5.32    1.16
   9  -7   2    4.15    1.04
 -10   7  -2    7.55    1.66
  10  -7   2    5.91    1.24
  10  -7   2    7.55    1.44
  14   6  -2   10.98    1.69
 -14  -6   2   10.85    1.68
  13   6  -2   14.73    1.85
 -13  -6   2   17.52    1.97
  12   6  -2    1.22    0.86
 -12  -6   2    2.57    0.97
  11   6  -2    2.08    0.86
 -11  -6   2    1.34    0.83
  10   6  -2   33.01    2.02
 -10  -6   2   33.81    2.05
   9   6  -2   28.39    1.77
  -9  -6   2   26.78    1.78
   8   6  -2    9.77    1.19
   8   6  -2   11.00    0.95
  -8  -6   2    9.48    0.84
  -8  -6   2    9.01    1.15
   7   6  -2    5.75    0.95
   7   6  -2    3.96    0.62
   7   6  -2    3.33    0.81
  -7  -6   2    6.19    0.99
  -7  -6   2    3.44    0.51
   6   6  -2   19.37    1.33
   6   6  -2   20.01    1.08
   6   6  -2   21.53    1.34
  -6  -6   2   21.65    1.40
  -6  -6   2   22.87    0.93
   5   6  -2   53.95    1.80
  -5  -6   2   52.43    2.03
  -5  -6   2   52.85    1.40
   4   6  -2   38.94    1.52
  -4  -6   2   38.74    1.14
  -4  -6   2   41.41    1.70
  -4  -6   2   41.09    1.74
   3   6  -2    3.41    0.60
  -3  -6   2    2.85    0.58
  -3  -6   2    2.81    0.65
   2   6  -2    0.79    0.40
   2   6  -2    0.07    0.25
  -2  -6   2    0.30    0.36
  -2  -6   2    0.74    0.38
   1   6  -2   22.44    0.96
   1   6  -2   21.98    1.24
  -1  -6   2   20.16    1.01
  -1  -6   2   20.09    1.22
   0   6  -2   64.17    2.21
   0   6  -2   67.35    1.92
   0  -6   2   63.59    2.15
   0  -6   2   65.90    1.75
  -1   6  -2    2.52    0.54
   1  -6   2    3.03    0.70
   1  -6   2    2.71    0.62
   1  -6   2    3.57    0.44
  -2   6  -2   35.85    1.56
   2  -6   2   36.89    1.71
   2  -6   2   35.49    1.66
   2  -6   2   36.46    0.92
  -3   6  -2    1.22    0.54
   3  -6   2    0.87    0.49
   3  -6   2    1.60    0.60
  -4   6  -2   17.09    1.32
   4  -6   2   19.10    1.36
   4  -6   2   19.80    1.39
  -5   6  -2   37.38    1.98
   5  -6   2   37.24    1.93
   5  -6   2   42.74    2.01
  -6   6  -2   29.59    1.89
   6  -6   2   31.85    1.85
   6  -6   2   30.92    1.86
  -7   6  -2   21.33    1.75
   7  -6   2   26.18    1.80
   7  -6   2   22.14    1.61
  -8   6  -2   -0.90    0.66
   8  -6   2    0.22    0.60
   8  -6   2    0.59    0.65
  -9   6  -2    0.97    0.90
   9  -6   2    2.99    1.00
   9  -6   2    3.59    0.94
 -10   6  -2    2.86    1.07
  10  -6   2    2.51    0.97
  10  -6   2    0.52    0.76
  14   5  -2    4.50    1.29
 -14  -5   2    4.62    1.18
  13   5  -2   12.20    1.68
 -13  -5   2   13.74    1.67
  12   5  -2   10.01    1.40
 -12  -5   2    7.59    1.29
  11   5  -2   24.28    1.85
 -11  -5   2   23.33    1.78
  10   5  -2    1.90    0.74
 -10  -5   2    1.03    0.51
 -10  -5   2    1.68    0.74
   9   5  -2    0.95    0.66
  -9  -5   2    0.17    0.50
  -9  -5   2    1.20    0.50
   8   5  -2   14.35    0.90
   8   5  -2   13.28    1.37
  -8  -5   2   15.85    1.53
  -8  -5   2   13.99    0.93
   7   5  -2   58.06    2.26
   7   5  -2   66.10    1.88
  -7  -5   2   63.51    1.80
  -7  -5   2   64.47    2.40
   6   5  -2   32.84    1.57
   6   5  -2   37.65    1.68
   6   5  -2   36.06    1.35
  -6  -5   2   38.85    1.21
  -6  -5   2   34.06    1.66
   5   5  -2    4.76    0.61
   5   5  -2    5.08    0.78
   5   5  -2    5.46    0.79
  -5  -5   2    5.49    0.83
  -5  -5   2    5.54    0.49
   4   5  -2    1.22    0.41
  -4  -5   2    0.87    0.45
  -4  -5   2    0.71    0.44
  -4  -5   2    0.97    0.26
   3   5  -2   57.27    1.78
  -3  -5   2   59.73    1.37
  -3  -5   2   55.64    1.90
  -3  -5   2   59.83    1.88
   2   5  -2    9.87    0.80
   2   5  -2    9.40    0.55
  -2  -5   2    9.00    0.87
  -2  -5   2    8.66    0.79
   1   5  -2   29.25    1.31
   1   5  -2   28.21    0.99
  -1  -5   2   30.20    1.15
  -1  -5   2   25.93    1.25
   0   5  -2    5.11    0.71
   0   5  -2    4.08    0.53
   0  -5   2    5.14    0.71
   0  -5   2    5.12    0.54
  -1   5  -2    0.43    0.36
   1  -5   2    0.22    0.23
   1  -5   2   -0.32    0.31
   1  -5   2   -0.03    0.31
  -2   5  -2   76.88    2.25
   2  -5   2   76.89    2.39
   2  -5   2   80.87    1.53
   2  -5   2   78.47    2.42
  -3   5  -2   88.73    2.60
   3  -5   2   90.21    2.68
   3  -5   2   88.78    2.67
  -4   5  -2    1.95    0.62
   4  -5   2    1.12    0.50
   4  -5   2    1.40    0.55
  -5   5  -2    6.02    0.96
   5  -5   2    5.93    0.95
   5  -5   2    4.89    0.84
  -6   5  -2   -0.19    0.54
   6  -5   2    0.02    0.48
   6  -5   2   -0.12    0.45
  -7   5  -2   22.58    1.72
   7  -5   2   22.66    1.52
   7  -5   2   23.60    1.61
  -8   5  -2   17.72    1.76
   8  -5   2   19.90    1.59
   8  -5   2   18.80    1.46
  -9   5  -2    9.55    1.50
   9  -5   2   10.71    1.51
   9  -5   2    9.93    1.27
 -10   5  -2    5.20    1.25
  10  -5   2    3.48    1.11
  10  -5   2    3.89    0.89
 -11   5  -2    0.83    0.93
  11  -5   2    2.14    0.99
  14   4  -2    6.68    1.40
 -14  -4   2    7.12    1.33
  13   4  -2   -0.26    0.73
 -13  -4   2    1.89    0.87
  12   4  -2   18.84    1.98
 -12  -4   2   16.83    1.72
 -12  -4   2   18.12    1.63
  11   4  -2   19.29    1.90
 -11  -4   2   17.49    1.67
 -11  -4   2   20.32    1.39
  10   4  -2    8.25    1.22
 -10  -4   2    9.17    1.04
 -10  -4   2    7.57    1.13
   9   4  -2    3.91    0.58
   9   4  -2    3.55    0.77
  -9  -4   2    4.32    0.89
  -9  -4   2    3.25    0.66
   8   4  -2   -0.28    0.48
   8   4  -2    0.39    0.33
  -8  -4   2    1.32    0.60
  -8  -4   2    0.24    0.36
   7   4  -2    6.77    0.68
   7   4  -2    8.08    1.01
  -7  -4   2    6.51    0.92
  -7  -4   2    7.50    0.75
   6   4  -2   46.98    1.83
   6   4  -2   43.78    1.42
  -6  -4   2   43.19    1.77
  -6  -4   2   41.81    1.33
   5   4  -2   23.42    1.02
   5   4  -2   22.71    1.20
   5   4  -2   20.55    1.20
  -5  -4   2   22.75    1.24
  -5  -4   2   23.17    0.86
   4   4  -2   10.80    0.73
  -4  -4   2    8.10    0.85
  -4  -4   2    9.64    0.51
   3   4  -2    0.63    0.35
  -3  -4   2    0.59    0.40
  -3  -4   2    0.76    0.21
  -3  -4   2    0.62    0.39
   2   4  -2   58.57    1.72
  -2  -4   2   58.43    1.71
  -2  -4   2   61.55    1.83
   1   4  -2   68.80    1.54
   1   4  -2   71.70    1.97
  -1  -4   2   67.90    1.76
   0   4  -2   71.67    1.71
   0   4  -2   69.84    2.02
   0  -4   2   68.50    1.65
   0  -4   2   70.50    1.99
  -1   4  -2   20.03    0.94
   1  -4   2   18.39    0.69
   1  -4   2   18.63    1.05
   1  -4   2   18.96    1.03
  -2   4  -2   -0.13    0.33
   2  -4   2   -0.17    0.15
   2  -4   2    0.20    0.37
   2  -4   2    0.13    0.36
  -3   4  -2   79.04    2.29
   3  -4   2   79.57    2.37
   3  -4   2   76.59    2.29
  -4   4  -2   48.14    1.85
   4  -4   2   46.60    1.85
   4  -4   2   49.26    1.83
  -5   4  -2    0.54    0.44
   5  -4   2    0.12    0.40
   5  -4   2    0.22    0.43
  -6   4  -2   -0.25    0.48
   6  -4   2    0.55    0.52
   6  -4   2    0.30    0.43
  -7   4  -2    0.23    0.58
   7  -4   2    0.23    0.44
   7  -4   2   -0.99    0.39
  -8   4  -2   16.48    1.71
   8  -4   2   16.16    1.62
   8  -4   2   16.65    1.30
  -9   4  -2    5.65    1.21
   9  -4   2    4.84    1.00
   9  -4   2    6.32    0.99
 -10   4  -2   16.20    1.84
  10  -4   2   11.25    1.30
  10  -4   2   15.31    1.73
 -11   4  -2    5.14    1.35
  11  -4   2    5.87    1.26
 -12   4  -2    3.65    1.21
  12  -4   2    1.86    0.96
  14   3  -2   21.66    2.24
 -14  -3   2   24.08    1.94
  13   3  -2    1.66    1.02
 -13  -3   2    3.65    0.97
 -13  -3   2    5.35    1.09
  12   3  -2    2.58    0.93
 -12  -3   2    4.45    1.06
 -12  -3   2    5.94    1.10
  11   3  -2    5.25    1.11
 -11  -3   2    7.16    1.12
 -11  -3   2    4.91    0.93
  10   3  -2   60.48    2.59
 -10  -3   2   64.91    2.37
 -10  -3   2   65.11    2.61
   9   3  -2   34.71    1.85
   9   3  -2   39.79    1.42
  -9  -3   2   32.56    1.77
  -9  -3   2   35.65    1.63
   8   3  -2   48.21    1.54
   8   3  -2   45.53    2.00
  -8  -3   2   45.10    1.72
  -8  -3   2   50.96    2.05
   7   3  -2   35.86    1.26
   7   3  -2   37.13    1.69
  -7  -3   2   33.54    1.35
  -7  -3   2   33.86    1.59
   6   3  -2   16.24    0.83
   6   3  -2   17.53    1.12
  -6  -3   2   15.96    1.08
  -6  -3   2   15.96    0.87
   5   3  -2   45.37    1.38
   5   3  -2   44.14    1.66
  -5  -3   2   46.58    1.32
  -5  -3   2   44.68    1.67
   4   3  -2   72.11    2.02
   4   3  -2   73.32    1.83
  -4  -3   2   72.71    2.10
  -4  -3   2   73.29    1.58
   3   3  -2  110.97    2.44
  -3  -3   2  112.90    2.02
  -3  -3   2  114.94    2.66
  -3  -3   2  113.54    2.66
   2   3  -2    2.26    0.42
  -2  -3   2    1.92    0.22
  -2  -3   2    1.76    0.43
  -2  -3   2    1.44    0.45
   1   3  -2   37.20    0.88
   1   3  -2   36.70    1.24
  -1  -3   2   34.69    1.14
   0   3  -2   23.65    1.02
   0   3  -2   24.35    0.81
   0  -3   2   23.78    1.03
   0  -3   2   24.90    0.84
  -1   3  -2  316.10    5.35
   1  -3   2  300.83    4.96
   1  -3   2  306.67    5.56
  -2   3  -2   47.52    1.49
   2  -3   2   47.00    1.57
   2  -3   2   45.77    1.53
   2  -3   2   45.44    0.92
  -3   3  -2    1.29    0.46
   3  -3   2    0.48    0.42
   3  -3   2    0.83    0.37
  -4   3  -2    5.02    0.73
   4  -3   2    5.86    0.72
   4  -3   2    5.63    0.77
  -5   3  -2   15.37    1.12
   5  -3   2   16.47    1.02
   5  -3   2   14.51    1.08
  -6   3  -2   36.87    1.76
   6  -3   2   35.69    1.68
   6  -3   2   34.94    1.54
  -7   3  -2    5.61    0.99
   7  -3   2    6.39    0.83
   7  -3   2    4.19    0.78
  -8   3  -2    0.46    0.61
   8  -3   2    1.48    0.55
   8  -3   2    0.54    0.56
  -9   3  -2    0.57    0.67
   9  -3   2   -0.13    0.41
   9  -3   2   -0.31    0.51
 -10   3  -2   24.19    1.92
  10  -3   2   21.61    1.73
  10  -3   2   24.59    1.54
 -11   3  -2   11.20    1.62
  11  -3   2   17.04    1.91
 -12   3  -2    2.26    1.05
  12  -3   2    5.63    1.28
 -13   3  -2    1.32    1.06
  13  -3   2    2.74    1.07
  14   2  -2   -0.40    0.80
 -14  -2   2    1.05    0.87
  13   2  -2    8.82    1.50
 -13  -2   2   12.92    1.57
 -13  -2   2   12.73    1.52
  12   2  -2   19.01    1.95
 -12  -2   2   17.34    1.69
 -12  -2   2   15.84    1.58
  11   2  -2    4.02    0.98
 -11  -2   2    0.94    0.68
 -11  -2   2    2.90    0.82
  10   2  -2   18.28    1.51
 -10  -2   2   16.65    1.30
 -10  -2   2   18.12    1.43
   9   2  -2    0.20    0.52
   9   2  -2    0.34    0.34
  -9  -2   2    0.10    0.47
  -9  -2   2    0.12    0.48
   8   2  -2   21.23    1.35
   8   2  -2   19.16    0.98
  -8  -2   2   22.32    1.35
  -8  -2   2   19.79    1.23
   7   2  -2   84.38    2.10
   7   2  -2   77.97    2.49
  -7  -2   2   81.49    2.30
  -7  -2   2   79.92    2.46
   6   2  -2   23.58    1.26
   6   2  -2   26.77    1.03
  -6  -2   2   24.57    1.11
  -6  -2   2   25.73    1.27
   5   2  -2   34.92    1.43
   5   2  -2   38.43    1.21
  -5  -2   2   35.59    1.45
  -5  -2   2   35.48    1.20
   4   2  -2   87.87    1.98
   4   2  -2   86.29    2.24
  -4  -2   2   88.39    1.90
  -4  -2   2   89.28    2.29
   3   2  -2   74.84    1.93
   3   2  -2   75.14    1.76
   3   2  -2   74.28    1.87
  -3  -2   2   74.30    1.95
  -3  -2   2   78.91    1.52
   2   2  -2   27.19    0.59
   2   2  -2   26.89    0.97
  -2  -2   2   26.73    1.02
  -2  -2   2   27.97    1.04
  -2  -2   2   27.12    0.58
   1   2  -2   40.47    0.75
   1   2  -2   39.66    1.19
   1   2  -2   40.43    0.74
  -1  -2   2   38.45    1.15
  -1  -2   2   39.47    1.21
   0   2  -2    3.61    0.32
   0   2  -2    3.19    0.46
   0  -2   2    2.88    0.41
   0  -2   2    2.84    0.35
  -1   2  -2   13.40    0.65
   1  -2   2   13.28    0.53
   1  -2   2   13.98    0.76
  -2   2  -2   45.92    1.36
   2  -2   2   46.34    1.45
   2  -2   2   46.28    0.92
   2  -2   2   45.16    1.37
  -3   2  -2   49.36    1.56
   3  -2   2   46.58    1.55
   3  -2   2   49.57    1.50
  -4   2  -2  125.19    2.97
   4  -2   2  120.09    2.92
   4  -2   2  119.71    2.74
  -5   2  -2    2.98    0.60
   5  -2   2    3.57    0.29
   5  -2   2    3.33    0.63
   5  -2   2    3.23    0.54
  -6   2  -2   -0.31    0.43
   6  -2   2    0.49    0.32
   6  -2   2   -0.66    0.36
   6  -2   2    0.22    0.18
  -7   2  -2   11.32    1.21
   7  -2   2   11.63    0.89
   7  -2   2   11.20    1.12
  -8   2  -2   15.91    1.31
   8  -2   2   16.36    1.07
   8  -2   2   15.94    1.31
  -9   2  -2   18.48    1.76
   9  -2   2   12.98    1.03
   9  -2   2   15.37    1.56
 -10   2  -2    5.93    1.20
  10  -2   2    6.65    0.91
  10  -2   2    4.19    0.98
 -11   2  -2    0.37    0.77
  11  -2   2   -0.74    0.56
 -12   2  -2    3.96    1.17
  12  -2   2    5.97    1.24
 -13   2  -2    7.35    1.57
  13  -2   2    7.09    1.41
  14   1  -2   -1.23    0.79
 -14  -1   2    0.01    0.83
  13   1  -2    0.45    0.85
 -13  -1   2    0.50    0.80
  12   1  -2    4.18    1.12
 -12  -1   2    7.19    1.18
 -12  -1   2    6.42    1.08
  11   1  -2   30.03    2.00
 -11  -1   2   25.28    1.65
 -11  -1   2   24.99    1.75
  10   1  -2   40.59    2.10
  10   1  -2   36.48    1.75
 -10  -1   2   35.01    1.79
 -10  -1   2   33.40    1.85
   9   1  -2    9.18    0.89
   9   1  -2    9.02    1.17
  -9  -1   2    9.37    1.09
  -9  -1   2    9.71    1.15
   8   1  -2    0.44    0.51
   8   1  -2    0.42    0.34
  -8  -1   2    0.37    0.41
  -8  -1   2    0.74    0.48
   7   1  -2   46.12    1.50
   7   1  -2   44.88    1.82
  -7  -1   2   43.08    1.69
  -7  -1   2   40.38    1.66
   6   1  -2   64.64    1.77
   6   1  -2   64.27    2.08
  -6  -1   2   63.11    2.02
  -6  -1   2   68.65    1.99
   5   1  -2    5.70    0.58
   5   1  -2    5.57    0.70
  -5  -1   2    6.30    0.74
  -5  -1   2    6.54    0.66
   4   1  -2   29.08    1.16
   4   1  -2   28.05    1.00
  -4  -1   2   27.35    1.00
  -4  -1   2   26.91    1.13
   3   1  -2    3.34    0.49
   3   1  -2    2.82    0.40
  -3  -1   2    2.62    0.36
  -3  -1   2    3.07    0.50
   2   1  -2   47.83    1.25
   2   1  -2   46.64    1.27
   2   1  -2   47.21    1.23
  -2  -1   2   48.42    1.34
  -2  -1   2   48.48    1.00
   1   1  -2   29.29    0.91
  -1  -1   2   30.08    0.94
   0   1  -2   51.54    1.26
   0   1  -2   51.69    0.96
   0  -1   2   50.60    1.23
   0  -1   2   51.00    0.96
   0  -1   2   50.43    1.17
  -1   1  -2    9.75    0.59
  -1   1  -2   10.23    0.52
   1  -1   2    9.21    0.58
   1  -1   2   10.09    0.45
  -2   1  -2   14.60    0.73
   2  -1   2   13.86    0.47
   2  -1   2   15.66    0.74
  -3   1  -2   31.52    1.18
   3  -1   2   33.44    0.79
   3  -1   2   32.16    1.19
   3  -1   2   31.74    1.05
  -4   1  -2   57.91    1.79
   4  -1   2   61.71    1.28
   4  -1   2   62.79    1.61
   4  -1   2   58.43    1.79
  -5   1  -2  144.54    2.62
  -5   1  -2  143.57    3.38
   5  -1   2  141.33    3.32
   5  -1   2  146.96    3.00
  -6   1  -2    7.74    0.51
  -6   1  -2    8.57    0.95
   6  -1   2    8.29    0.74
   6  -1   2   10.43    1.01
  -7   1  -2   17.73    0.79
  -7   1  -2   15.93    1.18
   7  -1   2   19.71    0.99
   7  -1   2   17.46    1.17
  -8   1  -2   14.86    1.44
  -8   1  -2   15.45    0.80
   8  -1   2   13.86    0.90
   8  -1   2   13.87    1.33
  -9   1  -2   63.63    2.59
   9  -1   2   68.62    2.10
   9  -1   2   70.43    2.65
 -10   1  -2   32.65    2.01
  10  -1   2   31.01    1.45
  10  -1   2   31.86    1.94
 -11   1  -2    1.42    0.84
  11  -1   2    0.83    0.76
 -12   1  -2    0.38    0.77
  12  -1   2    0.51    0.70
 -13   1  -2    4.99    1.29
  13  -1   2    1.35    0.92
 -14   1  -2   17.35    2.16
  14  -1   2   14.76    1.93
  13   0  -2   32.22    2.32
 -13   0   2   32.15    2.33
  12   0  -2    2.32    0.96
 -12   0   2    1.00    0.86
  11   0  -2   -0.63    0.62
 -11   0   2    0.31    0.68
 -11   0   2    0.30    0.49
  10   0  -2    2.32    0.59
  10   0  -2    3.25    0.87
 -10   0   2    1.94    0.65
 -10   0   2    1.73    0.75
   9   0  -2   37.04    1.93
   9   0  -2   34.05    1.52
  -9   0   2   36.49    1.68
  -9   0   2   34.35    1.84
   8   0  -2   16.41    1.00
   8   0  -2   16.12    1.25
  -8   0   2   17.77    1.28
  -8   0   2   17.75    1.12
   7   0  -2    2.20    0.46
   7   0  -2    2.52    0.61
  -7   0   2    3.14    0.59
  -7   0   2    2.59    0.64
   6   0  -2    6.48    0.68
   6   0  -2    4.33    0.69
  -6   0   2    6.16    0.72
  -6   0   2    4.90    0.71
   5   0  -2   15.40    0.95
   5   0  -2   15.66    0.82
  -5   0   2   15.05    0.94
  -5   0   2   15.61    0.89
   4   0  -2   87.34    2.03
   4   0  -2   90.78    2.20
  -4   0   2   87.28    2.13
  -4   0   2   89.69    2.14
   3   0  -2   58.48    1.55
   3   0  -2   59.64    1.51
  -3   0   2   59.08    1.57
  -3   0   2   61.26    1.50
   2   0  -2  198.49    3.52
   2   0  -2  199.01    3.51
  -2   0   2  204.03    3.45
  -2   0   2  201.36    3.61
   1   0  -2    0.17    0.22
  -1   0   2    0.09    0.23
  -1   0   2    0.03    0.17
   0   0  -2   88.16    1.70
   0   0  -2   88.52    1.49
   0   0   2   86.81    1.70
   0   0   2   89.02    1.60
   0   0   2   86.78    1.49
  -1   0  -2  191.32    3.23
  -1   0  -2  190.57    3.20
   1   0   2  196.75    3.24
   1   0   2  191.31    3.19
  -2   0  -2    2.60    0.32
  -2   0  -2    2.28    0.37
   2   0   2    2.72    0.37
   2   0   2    3.16    0.31
  -3   0  -2  189.28    3.66
   3   0   2  200.13    3.38
   3   0   2  201.82    3.34
  -4   0  -2   10.75    0.80
  -4   0  -2   10.45    0.54
   4   0   2    9.75    0.75
   4   0   2    9.62    0.55
  -5   0  -2   20.68    1.07
  -5   0  -2   20.78    0.80
   5   0   2   21.06    1.08
   5   0   2   20.45    0.81
  -6   0  -2   45.19    1.74
  -6   0  -2   46.17    1.34
   6   0   2   48.11    1.35
   6   0   2   47.39    1.74
  -7   0  -2   19.59    0.90
  -7   0  -2   18.33    1.23
   7   0   2   16.65    1.15
   7   0   2   16.78    0.85
  -8   0  -2   13.14    0.82
  -8   0  -2   16.08    1.25
   8   0   2   12.37    0.78
   8   0   2   14.02    1.11
  -9   0  -2    6.53    0.72
  -9   0  -2    6.74    1.04
   9   0   2    8.07    0.78
   9   0   2    7.55    1.06
 -10   0  -2    2.72    0.86
 -10   0  -2    2.79    0.56
  10   0   2    2.38    0.74
 -11   0  -2   19.66    1.89
  11   0   2   19.34    1.90
 -12   0  -2    8.73    1.36
  12   0   2   12.12    1.61
 -13   0  -2    2.32    1.03
  13   0   2    1.18    0.91
 -14   0  -2    2.47    1.09
  14   0   2    2.37    0.98
  13  -1  -2    8.02    1.47
 -13   1   2   10.38    1.64
  12  -1  -2    5.31    1.18
 -12   1   2    6.24    1.27
  11  -1  -2   12.94    1.57
 -11   1   2   14.42    1.67
  10  -1  -2    6.31    0.90
  10  -1  -2    4.42    1.00
 -10   1   2    5.08    1.08
 -10   1   2    6.94    0.90
   9  -1  -2    3.76    0.89
   9  -1  -2    5.56    0.81
  -9   1   2    5.12    0.76
  -9   1   2    6.19    1.11
   8  -1  -2   10.79    1.19
   8  -1  -2   10.25    0.96
  -8   1   2    9.95    1.20
  -8   1   2    7.40    0.86
   7  -1  -2   18.72    1.08
   7  -1  -2   18.97    1.26
  -7   1   2   18.02    1.02
  -7   1   2   16.25    1.20
   6  -1  -2   13.47    0.87
   6  -1  -2   14.38    1.03
  -6   1   2   16.50    1.11
  -6   1   2   14.33    0.87
   5  -1  -2    6.36    0.66
   5  -1  -2    8.51    0.83
  -5   1   2    5.97    0.73
  -5   1   2    6.73    0.67
   4  -1  -2    7.83    0.71
   4  -1  -2    8.35    0.66
  -4   1   2    7.87    0.68
  -4   1   2    8.36    0.78
   3  -1  -2    5.11    0.55
   3  -1  -2    3.38    0.47
  -3   1   2    4.26    0.53
  -3   1   2    5.04    0.52
   2  -1  -2  319.15    5.32
   2  -1  -2  320.98    5.22
  -2   1   2  316.55    5.27
  -2   1   2  312.75    5.36
   1  -1  -2    0.85    0.29
   1  -1  -2    1.34    0.22
  -1   1   2    0.80    0.27
  -1   1   2    1.57    0.31
   0  -1  -2   44.66    1.00
   0  -1  -2   45.54    1.05
   0  -1  -2   47.03    0.79
   0   1   2   45.10    0.78
   0   1   2   46.23    1.07
  -1  -1  -2   45.92    0.99
  -1  -1  -2   47.38    1.06
   1   1   2   46.03    1.08
   1   1   2   45.72    0.92
  -2  -1  -2  161.42    2.57
  -2  -1  -2  160.53    2.86
   2   1   2  160.10    2.79
   2   1   2  149.63    2.76
  -3  -1  -2   58.44    1.54
  -3  -1  -2   59.07    1.39
  -3  -1  -2   59.31    1.15
   3   1   2   62.56    1.51
  -4  -1  -2   59.53    1.68
  -4  -1  -2   60.28    1.47
   4   1   2   57.84    1.62
   4   1   2   60.45    1.20
  -5  -1  -2   12.89    0.72
  -5  -1  -2   14.00    0.87
   5   1   2   12.18    0.86
   5   1   2   13.65    0.54
  -6  -1  -2   29.34    1.35
  -6  -1  -2   27.85    1.08
   6   1   2   28.26    1.32
   6   1   2   28.18    0.87
  -7  -1  -2   27.50    1.39
  -7  -1  -2   32.18    1.23
   7   1   2   29.91    0.98
   7   1   2   33.31    1.48
  -8  -1  -2    7.17    0.97
  -8  -1  -2    6.70    0.73
   8   1   2    7.42    0.95
   8   1   2    6.99    0.56
  -9  -1  -2    3.57    0.79
  -9  -1  -2    2.97    0.59
   9   1   2    3.63    0.76
   9   1   2    3.30    0.47
 -10  -1  -2    1.22    0.46
 -10  -1  -2    0.43    0.53
  10   1   2    0.25    0.52
 -11  -1  -2    7.31    1.24
 -11  -1  -2    6.15    0.88
  11   1   2    8.62    1.30
 -12  -1  -2   10.19    1.45
  12   1   2   10.12    1.43
 -13  -1  -2   20.06    2.01
  13   1   2   19.76    2.02
 -14  -1  -2    0.52    0.90
  14   1   2    0.98    0.88
  13  -2  -2    1.33    0.93
 -13   2   2    0.60    0.94
  12  -2  -2    6.70    1.30
 -12   2   2    4.22    1.24
  11  -2  -2    6.12    1.17
 -11   2   2    5.77    1.30
  10  -2  -2   22.43    1.75
  10  -2  -2   17.54    1.30
 -10   2   2   23.43    2.09
   9  -2  -2   10.35    1.26
   9  -2  -2   11.54    1.12
  -9   2   2    9.87    1.33
  -9   2   2   10.23    1.04
   8  -2  -2    0.45    0.52
   8  -2  -2   -0.31    0.36
  -8   2   2    1.87    0.76
  -8   2   2    0.60    0.36
   7  -2  -2   11.57    0.94
   7  -2  -2   13.37    1.20
  -7   2   2   14.95    1.41
  -7   2   2   13.55    0.87
   6  -2  -2   23.24    1.19
   6  -2  -2   21.47    1.21
  -6   2   2   22.18    1.02
  -6   2   2   24.14    1.37
   5  -2  -2   65.87    2.02
   5  -2  -2   71.19    2.05
  -5   2   2   71.88    1.81
  -5   2   2   67.75    2.17
   4  -2  -2    0.15    0.29
   4  -2  -2    0.10    0.34
  -4   2   2    0.33    0.39
  -4   2   2    0.23    0.27
   3  -2  -2   45.63    1.43
   3  -2  -2   46.88    1.36
  -3   2   2   46.84    1.53
  -3   2   2   47.39    1.26
   2  -2  -2    7.93    0.62
   2  -2  -2    8.44    0.56
  -2   2   2    8.14    0.67
  -2   2   2    8.62    0.52
   1  -2  -2  350.46    5.47
   1  -2  -2  347.45    5.75
  -1   2   2  344.70    5.81
  -1   2   2  342.93    5.58
   0  -2  -2    0.30    0.25
   0  -2  -2    0.01    0.24
   0  -2  -2    0.29    0.12
   0   2   2    0.38    0.25
   0   2   2    0.27    0.12
  -1  -2  -2   22.65    0.75
  -1  -2  -2   22.46    0.67
   1   2   2   23.35    0.53
   1   2   2   21.50    0.73
  -2  -2  -2   -0.14    0.14
  -2  -2  -2   -0.13    0.24
  -2  -2  -2    0.02    0.23
   2   2   2   -0.01    0.19
  -3  -2  -2   29.96    1.00
  -3  -2  -2   27.91    0.96
   3   2   2   26.99    0.93
  -4  -2  -2  146.87    3.01
  -4  -2  -2  146.32    2.90
   4   2   2  139.14    2.91
  -5  -2  -2  111.95    2.67
  -5  -2  -2  115.02    1.87
  -5  -2  -2  115.74    2.56
   5   2   2  115.19    2.68
  -6  -2  -2   75.71    2.02
  -6  -2  -2   76.75    2.21
   6   2   2   73.34    2.17
   6   2   2   78.32    1.43
  -7  -2  -2   19.30    1.03
  -7  -2  -2   18.47    1.14
   7   2   2   19.78    0.64
   7   2   2   20.01    1.20
  -8  -2  -2   57.24    1.85
  -8  -2  -2   53.11    2.02
   8   2   2   54.03    2.09
   8   2   2   54.51    1.30
  -9  -2  -2    7.80    1.03
  -9  -2  -2    9.34    0.92
   9   2   2    8.50    0.53
   9   2   2    7.37    1.00
 -10  -2  -2   12.81    1.02
 -10  -2  -2   16.17    1.55
  10   2   2   13.56    1.43
 -11  -2  -2    6.53    0.93
 -11  -2  -2    6.27    1.09
  11   2   2    4.23    1.00
 -12  -2  -2    1.80    0.62
 -12  -2  -2   -0.44    0.59
  12   2   2   -0.09    0.55
 -13  -2  -2   13.46    1.68
  13   2   2   13.83    1.74
 -14  -2  -2    2.77    1.13
  14   2   2    2.40    1.09
 -15  -2  -2   29.78    2.75
  15   2   2   21.83    2.27
  12  -3  -2    1.64    0.88
 -12   3   2    0.65    0.87
  11  -3  -2    4.92    1.09
 -11   3   2    1.10    0.94
  10  -3  -2    5.66    1.09
  10  -3  -2    4.73    0.87
 -10   3   2    3.88    1.08
   9  -3  -2    0.90    0.55
   9  -3  -2    1.54    0.71
  -9   3   2    0.54    0.72
   8  -3  -2   19.53    1.39
   8  -3  -2   18.39    1.25
  -8   3   2   18.71    1.51
   7  -3  -2   26.25    1.48
   7  -3  -2   27.18    1.44
  -7   3   2   29.02    1.17
  -7   3   2   28.21    1.66
   6  -3  -2    0.35    0.43
   6  -3  -2    0.58    0.42
  -6   3   2    0.44    0.50
  -6   3   2    0.36    0.30
   5  -3  -2   16.02    1.02
   5  -3  -2   15.78    1.02
  -5   3   2   16.60    0.79
  -5   3   2   14.06    1.10
   4  -3  -2    0.19    0.36
   4  -3  -2    0.63    0.37
  -4   3   2    0.18    0.25
  -4   3   2    0.94    0.48
   3  -3  -2   71.82    1.98
   3  -3  -2   69.31    1.83
  -3   3   2   71.13    2.08
  -3   3   2   72.24    1.62
   2  -3  -2   26.21    1.09
   2  -3  -2   25.16    0.92
  -2   3   2   25.98    0.84
  -2   3   2   24.77    1.12
   1  -3  -2   16.39    0.84
   1  -3  -2   17.21    0.67
  -1   3   2   17.06    0.89
  -1   3   2   17.18    0.67
   0  -3  -2    9.61    0.45
   0  -3  -2    9.80    0.61
   0  -3  -2    8.87    0.62
   0   3   2   10.44    0.56
  -1  -3  -2    3.46    0.33
  -1  -3  -2    3.98    0.41
  -1  -3  -2    4.65    0.51
   1   3   2    4.03    0.45
  -2  -3  -2  164.34    3.09
  -2  -3  -2  164.62    2.82
  -2  -3  -2  161.90    3.07
   2   3   2  164.63    2.82
   2   3   2  166.13    2.90
  -3  -3  -2   10.82    0.71
  -3  -3  -2   10.31    0.66
  -3  -3  -2   11.61    0.42
   3   3   2   11.72    0.64
  -4  -3  -2    9.07    0.75
  -4  -3  -2    8.18    0.64
   4   3   2    7.90    0.68
  -5  -3  -2   37.75    1.34
  -5  -3  -2   37.42    1.33
   5   3   2   34.43    1.31
  -6  -3  -2   54.76    1.75
  -6  -3  -2   57.94    1.83
   6   3   2   54.31    1.81
  -7  -3  -2   30.59    1.33
  -7  -3  -2   29.15    1.38
   7   3   2   29.75    1.42
  -8  -3  -2    0.03    0.35
  -8  -3  -2    0.32    0.41
   8   3   2    0.50    0.40
  -9  -3  -2    2.36    0.64
  -9  -3  -2    3.30    0.66
   9   3   2    2.78    0.66
 -10  -3  -2    8.52    1.09
 -10  -3  -2    8.66    1.03
  10   3   2    8.71    1.21
 -11  -3  -2   25.26    1.51
 -11  -3  -2   29.25    1.78
  11   3   2   25.50    1.76
 -12  -3  -2   22.28    1.70
 -12  -3  -2   22.09    1.47
  12   3   2   20.42    1.67
 -13  -3  -2   -0.21    0.66
 -13  -3  -2    0.52    0.59
  13   3   2    0.46    0.75
 -14  -3  -2    1.38    0.90
  14   3   2    0.40    0.80
 -15  -3  -2    7.35    1.43
  15   3   2    5.89    1.42
  12  -4  -2   10.89    1.61
 -12   4   2   11.81    1.89
  11  -4  -2   10.30    1.33
  11  -4  -2    9.75    1.45
 -11   4   2   11.57    1.67
  10  -4  -2    0.67    0.71
  10  -4  -2    0.24    0.56
 -10   4   2    0.25    0.75
   9  -4  -2    3.11    0.78
   9  -4  -2    4.16    0.95
  -9   4   2    4.43    1.06
   8  -4  -2   19.15    1.40
   8  -4  -2   18.50    1.43
  -8   4   2   21.35    1.62
   7  -4  -2    7.11    0.96
   7  -4  -2    6.43    0.91
  -7   4   2    7.60    1.17
   6  -4  -2    2.48    0.61
   6  -4  -2    3.50    0.67
  -6   4   2    3.56    0.77
  -6   4   2    2.64    0.43
   5  -4  -2   11.81    0.94
   5  -4  -2   12.63    1.00
  -5   4   2   13.60    0.69
  -5   4   2   11.01    1.11
   4  -4  -2    5.29    0.72
   4  -4  -2    6.21    0.71
  -4   4   2    6.09    0.48
  -4   4   2    7.11    0.90
   3  -4  -2   40.58    1.39
   3  -4  -2   39.90    1.55
  -3   4   2   41.31    1.64
  -3   4   2   40.56    1.10
   2  -4  -2   48.82    1.65
   2  -4  -2   48.31    1.43
  -2   4   2   51.16    1.70
  -2   4   2   52.72    1.25
   1  -4  -2   36.56    1.10
   1  -4  -2   34.77    1.31
  -1   4   2   37.51    1.37
  -1   4   2   35.63    1.01
   0  -4  -2    2.24    0.45
   0  -4  -2    1.68    0.31
   0  -4  -2    2.17    0.43
   0   4   2    2.09    0.36
  -1  -4  -2    6.63    0.48
  -1  -4  -2    6.33    0.58
  -1  -4  -2    6.53    0.63
   1   4   2    7.01    0.58
  -2  -4  -2   27.37    1.02
  -2  -4  -2   28.63    0.92
  -2  -4  -2   26.03    0.92
  -2  -4  -2   26.29    1.02
  -3  -4  -2   70.05    1.84
  -3  -4  -2   71.11    1.52
  -3  -4  -2   71.69    1.78
   3   4   2   68.91    1.64
   3   4   2   71.28    1.71
  -4  -4  -2   17.67    0.94
  -4  -4  -2   16.40    0.85
  -4  -4  -2   16.45    0.56
   4   4   2   16.83    0.84
  -5  -4  -2    0.44    0.34
  -5  -4  -2    0.64    0.37
   5   4   2   -0.24    0.31
  -6  -4  -2    1.68    0.48
  -6  -4  -2    1.19    0.46
   6   4   2    0.68    0.40
  -7  -4  -2   62.38    2.02
  -7  -4  -2   67.27    2.10
   7   4   2   60.50    2.06
  -8  -4  -2   24.56    1.32
  -8  -4  -2   23.65    1.30
   8   4   2   23.14    1.37
  -9  -4  -2   25.03    1.40
  -9  -4  -2   24.80    1.43
   9   4   2   25.09    1.52
 -10  -4  -2    3.04    0.74
 -10  -4  -2    4.03    0.86
  10   4   2    5.16    0.93
 -11  -4  -2    1.62    0.63
 -11  -4  -2    1.61    0.70
  11   4   2    1.99    0.76
 -12  -4  -2   83.68    3.01
 -12  -4  -2   90.13    3.26
  12   4   2   93.03    3.45
 -13  -4  -2    1.37    0.84
 -13  -4  -2    1.55    0.66
  13   4   2    1.96    0.85
 -14  -4  -2    6.32    1.27
 -14  -4  -2    8.67    1.31
  14   4   2    7.39    1.46
 -15  -4  -2    0.40    0.86
  15   4   2    1.35    1.01
  11  -5  -2   17.39    1.83
  11  -5  -2   18.12    1.78
 -11   5   2   13.44    1.76
  10  -5  -2    8.55    1.31
  10  -5  -2    8.04    1.26
 -10   5   2    7.12    1.41
   9  -5  -2    3.14    0.87
   9  -5  -2    4.45    0.94
  -9   5   2    4.26    1.12
   8  -5  -2    2.15    0.74
   8  -5  -2    2.57    0.77
  -8   5   2    1.98    0.88
   7  -5  -2    0.01    0.52
   7  -5  -2   -0.31    0.45
  -7   5   2   -0.31    0.48
   6  -5  -2   16.14    1.27
   6  -5  -2   17.25    1.23
  -6   5   2   13.89    1.39
   5  -5  -2    0.23    0.43
   5  -5  -2    0.98    0.51
  -5   5   2    0.71    0.50
  -5   5   2    0.08    0.22
   4  -5  -2    9.80    0.92
   4  -5  -2    9.51    0.98
  -4   5   2    9.94    1.10
  -4   5   2   10.31    0.55
   3  -5  -2    0.00    0.35
   3  -5  -2    0.62    0.44
  -3   5   2    0.50    0.45
  -3   5   2    1.03    0.27
   2  -5  -2   11.54    0.79
   2  -5  -2   12.33    1.06
  -2   5   2   12.32    0.60
  -2   5   2   12.35    1.08
   1  -5  -2   16.28    0.98
   1  -5  -2   16.31    0.81
  -1   5   2   16.10    0.70
  -1   5   2   14.22    0.94
   0  -5  -2    9.67    0.85
   0  -5  -2    8.69    0.61
   0   5   2   11.32    0.83
   0   5   2    9.97    0.62
  -1  -5  -2  131.78    2.88
  -1  -5  -2  136.04    2.94
  -1  -5  -2  137.67    2.74
   1   5   2  132.71    2.74
  -2  -5  -2    7.82    0.61
  -2  -5  -2    9.05    0.71
  -2  -5  -2    9.19    0.70
  -2  -5  -2    7.82    0.62
  -3  -5  -2    4.69    0.55
  -3  -5  -2    5.61    0.53
  -3  -5  -2    4.60    0.63
  -4  -5  -2   84.57    1.79
  -4  -5  -2   83.08    2.09
  -4  -5  -2   81.84    2.21
   4   5   2   79.85    2.07
   4   5   2   81.40    2.03
  -5  -5  -2    6.42    0.76
  -5  -5  -2    7.54    0.74
   5   5   2    6.18    0.41
   5   5   2    4.99    0.64
  -6  -5  -2   44.91    1.71
  -6  -5  -2   44.93    1.57
   6   5   2   45.54    1.68
   6   5   2   47.14    0.99
  -7  -5  -2    0.16    0.42
  -7  -5  -2    1.35    0.48
   7   5   2    0.86    0.45
  -8  -5  -2    5.78    0.79
  -8  -5  -2    5.44    0.79
   8   5   2    6.76    0.94
  -9  -5  -2   19.36    1.28
  -9  -5  -2   18.01    1.28
   9   5   2   20.79    1.37
 -10  -5  -2   14.78    1.41
 -10  -5  -2   17.57    1.33
  10   5   2   17.12    1.40
 -11  -5  -2   22.52    1.55
 -11  -5  -2   24.08    1.56
  11   5   2   22.50    1.67
 -12  -5  -2    0.20    0.57
 -12  -5  -2    0.25    0.59
  12   5   2    0.39    0.65
 -13  -5  -2    5.15    1.07
 -13  -5  -2    6.59    1.17
  13   5   2    6.60    1.28
 -14  -5  -2    9.59    1.36
 -14  -5  -2    8.70    1.37
  14   5   2   11.10    1.61
 -15  -5  -2    7.03    1.30
 -15  -5  -2    8.77    1.41
  15   5   2    9.91    1.61
  10  -6  -2    5.30    1.09
  10  -6  -2    3.46    0.99
 -10   6   2    4.38    1.18
   9  -6  -2   11.26    1.39
   9  -6  -2    9.94    1.37
  -9   6   2   11.43    1.59
   8  -6  -2    2.22    0.81
   8  -6  -2    2.83    0.81
  -8   6   2    3.82    1.01
   7  -6  -2    0.48    0.59
   7  -6  -2   -0.17    0.55
  -7   6   2   -0.34    0.57
   6  -6  -2    2.65    0.74
   6  -6  -2    3.11    0.77
  -6   6   2    2.39    0.82
   5  -6  -2    5.52    0.93
   5  -6  -2    7.65    0.94
  -5   6   2    5.51    0.94
   4  -6  -2   18.77    1.32
   4  -6  -2   20.38    1.20
  -4   6   2   19.74    1.40
   3  -6  -2    0.72    0.40
   3  -6  -2    0.31    0.41
  -3   6   2    0.64    0.51
  -3   6   2    0.88    0.26
   2  -6  -2    0.41    0.36
   2  -6  -2    0.83    0.44
  -2   6   2    0.79    0.26
  -2   6   2    0.56    0.48
   1  -6  -2    3.48    0.62
   1  -6  -2    2.79    0.49
  -1   6   2    3.35    0.42
  -1   6   2    2.69    0.60
   0  -6  -2    1.10    0.37
   0  -6  -2    0.52    0.41
   0   6   2    1.50    0.35
   0   6   2    1.55    0.48
  -1  -6  -2    7.85    0.70
  -1  -6  -2    8.11    0.80
  -1  -6  -2    8.17    0.82
   1   6   2    7.63    0.62
  -2  -6  -2    0.28    0.34
  -2  -6  -2    0.66    0.35
  -2  -6  -2    0.10    0.33
  -2  -6  -2    0.94    0.40
  -3  -6  -2   45.60    1.44
  -3  -6  -2   48.11    1.62
  -3  -6  -2   46.67    1.54
  -3  -6  -2   48.12    1.53
  -4  -6  -2    7.37    0.74
  -4  -6  -2    6.91    0.63
  -4  -6  -2    6.57    0.74
   4   6   2    8.09    0.78
   4   6   2    6.53    0.67
  -5  -6  -2   43.40    1.66
  -5  -6  -2   39.53    1.44
   5   6   2   40.85    1.20
   5   6   2   40.14    1.48
   5   6   2   40.01    1.51
  -6  -6  -2   19.00    1.07
  -6  -6  -2   22.11    1.25
   6   6   2   20.17    1.15
   6   6   2   21.93    0.76
  -7  -6  -2   16.76    1.04
  -7  -6  -2   19.05    1.23
   7   6   2   17.83    0.61
   7   6   2   17.97    1.17
  -8  -6  -2   28.23    1.54
  -8  -6  -2   28.42    1.41
   8   6   2   27.46    1.47
  -9  -6  -2    2.15    0.69
  -9  -6  -2    1.36    0.55
   9   6   2    2.19    0.72
 -10  -6  -2   11.58    1.20
 -10  -6  -2    9.81    1.22
  10   6   2   12.42    1.41
 -11  -6  -2   12.11    1.35
 -11  -6  -2   14.06    1.40
  11   6   2   11.24    1.42
 -12  -6  -2    6.64    1.08
 -12  -6  -2    5.65    1.06
  12   6   2    6.76    1.25
 -13  -6  -2   -0.10    0.63
 -13  -6  -2   -0.91    0.47
  13   6   2   -0.74    0.60
 -14  -6  -2    2.17    0.89
 -14  -6  -2    2.31    0.90
  14   6   2    2.33    1.08
 -15  -6  -2    1.36    0.91
 -15  -6  -2    2.95    1.00
  15   6   2    2.10    1.15
  10  -7  -2    0.22    0.79
  10  -7  -2    0.89    0.80
 -10   7   2    1.42    0.97
   9  -7  -2    5.81    1.16
   9  -7  -2    8.08    1.33
  -9   7   2    7.27    1.50
   8  -7  -2    2.14    0.86
   8  -7  -2    2.98    0.89
  -8   7   2    2.99    1.01
   7  -7  -2   17.40    1.74
   7  -7  -2   18.42    1.47
  -7   7   2   17.40    1.82
   6  -7  -2    1.34    0.65
   6  -7  -2    0.71    0.70
  -6   7   2    1.29    0.75
   5  -7  -2    0.62    0.51
   5  -7  -2    0.21    0.51
  -5   7   2    0.15    0.59
   4  -7  -2   54.96    2.08
   4  -7  -2   52.04    2.24
  -4   7   2   60.21    2.44
   3  -7  -2   28.97    1.61
   3  -7  -2   30.16    1.45
  -3   7   2   30.58    1.72
   2  -7  -2   24.59    1.27
   2  -7  -2   25.81    1.46
  -2   7   2   25.11    0.89
  -2   7   2   25.65    1.49
   1  -7  -2    4.95    0.76
   1  -7  -2    5.69    0.70
  -1   7   2    6.32    0.57
  -1   7   2    5.16    0.79
   0  -7  -2    3.23    0.65
   0  -7  -2    4.10    0.61
   0   7   2    3.99    0.66
   0   7   2    4.42    0.54
  -1  -7  -2   25.47    1.17
  -1  -7  -2   27.34    1.32
   1   7   2   27.13    1.12
   1   7   2   28.54    1.35
  -2  -7  -2   33.51    1.39
  -2  -7  -2   31.07    1.29
  -2  -7  -2   30.60    1.34
  -2  -7  -2   33.04    1.31
  -3  -7  -2   71.29    2.07
  -3  -7  -2   71.39    2.04
  -3  -7  -2   70.32    2.07
  -3  -7  -2   70.31    2.08
  -4  -7  -2    4.44    0.64
  -4  -7  -2    4.60    0.71
  -4  -7  -2    3.93    0.55
  -4  -7  -2    5.11    0.70
  -5  -7  -2    6.06    0.79
  -5  -7  -2    6.37    0.73
   5   7   2    6.39    0.74
   5   7   2    7.29    0.83
  -6  -7  -2   45.15    1.84
  -6  -7  -2   45.95    1.66
   6   7   2   43.02    1.32
   6   7   2   43.45    1.74
  -7  -7  -2   16.48    1.19
  -7  -7  -2   16.20    1.05
   7   7   2   17.26    0.74
   7   7   2   16.27    1.16
  -8  -7  -2   65.09    2.19
  -8  -7  -2   66.16    2.44
   8   7   2   63.80    2.37
  -9  -7  -2   18.20    1.38
  -9  -7  -2   20.32    1.29
   9   7   2   16.74    1.33
 -10  -7  -2    7.90    1.15
 -10  -7  -2    9.02    1.06
  10   7   2   11.46    1.35
 -11  -7  -2   21.00    1.48
 -11  -7  -2   20.60    1.61
  11   7   2   22.35    1.71
 -12  -7  -2    9.16    1.22
 -12  -7  -2    7.78    1.28
  12   7   2    9.29    1.40
 -13  -7  -2   16.80    1.79
 -13  -7  -2   17.74    1.70
  13   7   2   23.67    2.25
 -14  -7  -2    2.70    0.90
 -14  -7  -2    2.88    1.01
  14   7   2    1.29    0.97
 -15  -7  -2   -0.46    0.74
 -15  -7  -2    0.77    0.77
  15   7   2    0.23    0.96
   9  -8  -2    1.32    0.88
  -9   8   2    2.06    1.11
   8  -8  -2   -0.84    0.59
   8  -8  -2   -0.60    0.61
  -8   8   2    0.37    0.84
   7  -8  -2    3.71    0.98
   7  -8  -2    2.32    0.82
  -7   8   2    1.53    0.92
   6  -8  -2    0.66    0.66
   6  -8  -2    0.33    0.57
  -6   8   2    0.54    0.64
   5  -8  -2   10.99    1.24
   5  -8  -2   11.98    1.48
  -5   8   2    7.68    1.21
   4  -8  -2    3.75    0.78
   4  -8  -2    5.97    1.12
  -4   8   2    6.71    1.18
   3  -8  -2    1.18    0.61
   3  -8  -2    0.22    0.48
  -3   8   2    1.42    0.68
   2  -8  -2    9.47    1.10
   2  -8  -2    8.86    1.00
  -2   8   2    9.50    1.13
   1  -8  -2    4.81    0.84
   1  -8  -2    7.29    0.85
  -1   8   2    6.25    0.61
  -1   8   2    4.55    0.79
   0  -8  -2   45.87    1.91
   0  -8  -2   45.76    1.70
   0   8   2   46.60    1.94
   0   8   2   46.66    1.49
  -1  -8  -2    4.06    0.65
  -1  -8  -2    3.87    0.72
   1   8   2    3.36    0.55
   1   8   2    4.32    0.73
  -2  -8  -2   12.12    0.92
  -2  -8  -2   10.62    1.04
  -2  -8  -2   12.60    0.97
  -2  -8  -2   10.59    0.85
  -3  -8  -2    5.94    0.75
  -3  -8  -2    8.14    0.87
  -3  -8  -2    8.06    0.90
  -3  -8  -2    6.56    0.79
  -4  -8  -2   22.82    1.19
  -4  -8  -2   24.00    1.28
  -4  -8  -2   22.68    1.27
  -4  -8  -2   23.67    1.20
  -5  -8  -2   30.64    1.54
  -5  -8  -2   27.99    1.32
   5   8   2   30.76    1.41
   5   8   2   28.24    1.41
  -6  -8  -2   -0.42    0.34
  -6  -8  -2    0.15    0.43
   6   8   2    0.01    0.38
   6   8   2    0.05    0.28
   6   8   2    0.03    0.38
  -7  -8  -2    0.26    0.44
  -7  -8  -2    0.64    0.53
   7   8   2    1.45    0.61
   7   8   2    0.78    0.34
  -8  -8  -2    3.84    0.85
  -8  -8  -2    4.21    0.72
   8   8   2    5.58    0.95
  -9  -8  -2   10.53    1.26
  -9  -8  -2   10.58    1.09
   9   8   2    9.15    1.22
 -10  -8  -2    5.75    0.91
 -10  -8  -2    5.83    1.09
  10   8   2    5.28    1.04
 -11  -8  -2    4.87    1.09
 -11  -8  -2    3.44    0.83
  11   8   2    4.70    1.05
 -12  -8  -2    0.82    0.65
 -12  -8  -2   -0.50    0.63
  12   8   2    0.02    0.65
 -13  -8  -2   10.16    1.34
 -13  -8  -2   10.48    1.52
  13   8   2    8.11    1.43
 -14  -8  -2    5.51    1.24
  14   8   2    3.09    1.18
 -15  -8  -2   11.47    1.67
  15   8   2   10.28    1.71
   8  -9  -2    6.76    1.28
  -8   9   2    6.26    1.46
   7  -9  -2    0.54    0.77
   7  -9  -2    0.48    0.67
  -7   9   2    0.96    0.92
   6  -9  -2    2.10    0.78
   6  -9  -2    4.33    1.10
  -6   9   2    2.60    1.02
   5  -9  -2   24.57    1.85
   5  -9  -2   31.21    1.83
  -5   9   2   30.33    2.15
   4  -9  -2    4.15    0.89
   4  -9  -2    4.73    1.04
  -4   9   2    4.86    1.10
   3  -9  -2    2.56    0.82
   3  -9  -2    1.64    0.64
  -3   9   2    0.71    0.66
   2  -9  -2    1.29    0.57
   2  -9  -2    2.37    0.79
  -2   9   2    1.34    0.71
   1  -9  -2   12.48    1.17
   1  -9  -2   13.61    1.41
  -1   9   2    9.88    1.25
   0  -9  -2   49.23    2.11
   0  -9  -2   45.88    1.83
   0   9   2   49.03    2.12
   0   9   2   46.06    1.55
  -1  -9  -2   39.44    1.83
  -1  -9  -2   39.70    1.69
   1   9   2   38.98    1.85
   1   9   2   40.10    1.53
  -2  -9  -2   33.18    1.55
  -2  -9  -2   34.34    1.66
   2   9   2   33.93    1.62
  -3  -9  -2    0.10    0.44
  -3  -9  -2   -0.18    0.35
  -3  -9  -2   -0.24    0.39
  -3  -9  -2    0.25    0.46
  -4  -9  -2    9.74    1.04
  -4  -9  -2    8.34    0.95
  -4  -9  -2    6.47    0.82
  -4  -9  -2    9.10    0.96
  -5  -9  -2   14.86    1.06
  -5  -9  -2   15.96    1.21
  -6  -9  -2   12.93    1.30
  -6  -9  -2   12.26    1.12
   6   9   2   11.12    1.08
   6   9   2    9.98    1.09
   6   9   2   12.67    0.91
  -7  -9  -2   18.96    1.40
  -7  -9  -2   15.72    1.13
   7   9   2   15.69    1.26
   7   9   2   15.04    1.34
   7   9   2   16.23    0.96
  -8  -9  -2    0.59    0.50
  -8  -9  -2    0.73    0.62
   8   9   2    1.07    0.60
  -9  -9  -2    6.08    0.88
  -9  -9  -2    4.42    0.97
   9   9   2    4.53    0.93
 -10  -9  -2   20.51    1.43
 -10  -9  -2   21.22    1.92
  10   9   2   20.87    1.64
 -11  -9  -2    6.93    1.21
 -11  -9  -2    6.52    1.00
  11   9   2    7.51    1.30
 -12  -9  -2   15.32    1.52
 -12  -9  -2   13.42    1.70
  12   9   2   19.06    1.97
 -13  -9  -2    2.42    1.01
  13   9   2    2.39    1.01
 -14  -9  -2    0.47    0.87
  14   9   2    0.37    0.88
   7 -10  -2   10.00    1.65
  -7  10   2    7.44    1.47
   6 -10  -2    4.67    1.16
  -6  10   2    4.37    1.24
   5 -10  -2    1.34    0.83
   5 -10  -2    0.90    0.73
  -5  10   2   -0.61    0.71
   4 -10  -2    2.89    0.82
   4 -10  -2    2.49    0.92
  -4  10   2    1.85    0.83
   3 -10  -2   17.28    1.43
   3 -10  -2   15.55    1.62
  -3  10   2   17.97    1.83
   2 -10  -2   22.96    1.69
   2 -10  -2   22.40    1.49
  -2  10   2   24.62    1.81
   1 -10  -2   23.29    1.68
   1 -10  -2   31.01    1.67
  -1  10   2   26.48    1.76
   0 -10  -2    5.48    0.90
   0 -10  -2    4.97    0.97
   0  10   2    4.04    0.90
  -1 -10  -2    5.41    0.94
  -1 -10  -2    6.96    0.95
   1  10   2    6.74    0.79
   1  10   2    7.02    1.06
  -2 -10  -2   21.24    1.46
  -2 -10  -2   24.97    1.46
   2  10   2   26.36    1.33
   2  10   2   24.35    1.56
  -3 -10  -2    4.97    0.87
  -3 -10  -2    6.30    0.90
  -3 -10  -2    5.52    0.82
  -4 -10  -2   25.11    1.46
  -4 -10  -2   26.28    1.50
  -4 -10  -2   29.85    1.58
  -4 -10  -2   28.70    1.51
  -5 -10  -2    0.02    0.41
  -5 -10  -2   -0.52    0.43
  -5 -10  -2   -0.13    0.41
  -6 -10  -2    6.16    0.85
  -6 -10  -2    6.81    1.02
   6  10   2    6.29    0.94
   6  10   2    5.91    0.81
   6  10   2    6.47    0.97
  -7 -10  -2   26.95    1.72
  -7 -10  -2   27.77    1.50
   7  10   2   26.63    1.33
   7  10   2   27.33    1.67
   7  10   2   25.60    1.58
  -8 -10  -2   10.35    1.30
  -8 -10  -2   12.16    1.18
   8  10   2    9.88    1.25
  -9 -10  -2    5.98    0.91
  -9 -10  -2    7.69    1.20
   9  10   2    5.82    1.05
 -10 -10  -2    1.57    0.85
 -10 -10  -2    1.76    0.66
  10  10   2   -0.12    0.66
 -11 -10  -2    1.34    0.80
  11  10   2    1.17    0.79
 -12 -10  -2    5.07    1.20
  12  10   2    3.31    1.03
 -13 -10  -2   16.11    1.92
  13  10   2   15.03    1.95
 -14 -10  -2    2.49    1.09
  14  10   2    3.65    1.20
   6 -11  -2   14.99    1.91
  -6  11   2    9.92    1.60
   5 -11  -2    2.89    1.05
  -5  11   2    4.37    1.21
   4 -11  -2   -0.23    0.66
  -4  11   2   -0.42    0.80
   3 -11  -2    9.53    1.29
   3 -11  -2   11.14    1.54
  -3  11   2    9.39    1.43
   2 -11  -2   10.12    1.42
   2 -11  -2   11.76    1.34
  -2  11   2    8.84    1.38
   1 -11  -2   67.70    2.62
   1 -11  -2   62.04    2.81
  -1  11   2   67.22    2.91
   0 -11  -2   -0.99    0.53
   0 -11  -2    1.35    0.64
   0  11   2    0.82    0.71
  -1 -11  -2   12.58    1.30
  -1 -11  -2   12.37    1.44
   1  11   2   13.04    1.42
  -2 -11  -2    2.14    0.70
  -2 -11  -2    1.35    0.67
   2  11   2    0.45    0.56
   2  11   2    1.31    0.57
  -3 -11  -2   10.87    1.14
  -3 -11  -2   12.64    1.31
  -3 -11  -2   10.33    1.24
   3  11   2    9.33    1.16
  -4 -11  -2    2.72    0.74
  -4 -11  -2    3.81    0.77
  -4 -11  -2    3.28    0.78
  -5 -11  -2    7.46    1.06
  -5 -11  -2    7.99    1.04
  -5 -11  -2    7.37    1.06
   5  11   2    8.11    1.06
  -6 -11  -2   39.57    2.01
  -6 -11  -2   35.99    1.76
   6  11   2   33.11    1.85
   6  11   2   35.84    1.85
   6  11   2   39.42    1.83
  -7 -11  -2    0.81    0.60
  -7 -11  -2    1.82    0.74
   7  11   2    1.38    0.67
   7  11   2    1.43    0.72
   7  11   2    0.95    0.52
  -8 -11  -2   10.21    1.14
  -8 -11  -2    9.48    1.30
   8  11   2    9.93    1.31
   8  11   2   11.11    1.35
  -9 -11  -2    9.00    1.39
   9  11   2   13.67    1.62
 -10 -11  -2   16.10    1.80
  10  11   2   22.93    2.11
 -11 -11  -2    4.90    1.21
  11  11   2    6.93    1.28
 -12 -11  -2    1.69    0.96
  12  11   2    1.02    0.80
 -13 -11  -2   -0.70    0.75
  13  11   2   -0.09    0.80
   4 -12  -2   13.29    1.77
  -4  12   2    9.92    1.61
   3 -12  -2    3.67    1.08
  -3  12   2    2.51    1.05
   2 -12  -2    7.21    1.38
  -2  12   2    6.01    1.27
   1 -12  -2    4.75    0.99
   1 -12  -2    5.58    1.18
  -1  12   2    5.13    1.20
   0 -12  -2   34.83    2.02
   0 -12  -2   34.83    2.17
   0  12   2   33.17    2.18
  -1 -12  -2   18.07    1.76
  -1 -12  -2   17.92    1.68
   1  12   2   19.89    1.82
  -2 -12  -2    9.39    1.21
  -2 -12  -2    7.50    1.21
   2  12   2    8.95    1.28
  -3 -12  -2    3.33    0.84
  -3 -12  -2    3.50    0.88
   3  12   2    5.07    0.97
   3  12   2    3.58    0.81
  -4 -12  -2    3.47    0.79
  -4 -12  -2    4.71    0.92
   4  12   2    3.85    0.87
  -5 -12  -2   14.79    1.47
  -5 -12  -2   14.47    1.49
   5  12   2   14.53    1.43
  -6 -12  -2   24.92    1.62
  -6 -12  -2   27.72    1.82
   6  12   2   25.09    1.61
   6  12   2   28.24    1.73
   6  12   2   26.95    1.75
  -7 -12  -2   12.91    1.32
  -7 -12  -2   12.02    1.45
   7  12   2   11.47    1.40
   7  12   2   12.68    1.40
  -8 -12  -2    2.81    0.89
   8  12   2    2.68    0.91
   8  12   2    0.73    0.75
  -9 -12  -2   14.28    1.71
   9  12   2   12.88    1.57
 -10 -12  -2    3.32    1.06
  10  12   2    5.15    1.16
 -11 -12  -2   18.50    2.06
  11  12   2   16.09    1.88
 -12 -12  -2   11.67    1.73
  12  12   2    9.61    1.60
 -13 -12  -2    1.38    1.00
  13  12   2    1.09    0.96
   2 -13  -2   15.51    1.89
  -2  13   2   13.85    1.88
   1 -13  -2    4.44    1.23
  -1  13   2    9.35    1.51
   0 -13  -2    0.34    0.77
   0  13   2    1.07    0.83
  -1 -13  -2    4.54    1.14
  -1 -13  -2    4.03    0.99
   1  13   2    3.73    1.07
  -2 -13  -2   11.90    1.45
  -2 -13  -2   12.62    1.58
   2  13   2   11.28    1.49
  -3 -13  -2   23.19    1.90
  -3 -13  -2   25.37    1.84
   3  13   2   26.48    1.87
  -4 -13  -2    2.95    0.87
   4  13   2    2.99    0.85
  -5 -13  -2    1.31    0.72
  -5 -13  -2    1.66    0.81
   5  13   2    2.36    0.84
   5  13   2    1.01    0.75
  -6 -13  -2    2.01    0.82
   6  13   2    3.18    0.91
   6  13   2    2.96    0.84
   6  13   2    1.99    0.78
  -7 -13  -2   21.28    1.75
   7  13   2   18.66    1.83
   7  13   2   23.22    1.77
  -8 -13  -2    2.57    0.95
   8  13   2    2.21    0.90
   8  13   2    2.80    0.92
  -9 -13  -2    0.43    0.75
   9  13   2    0.49    0.81
 -10 -13  -2    1.80    0.93
  10  13   2    0.76    0.81
 -11 -13  -2    3.05    1.16
  11  13   2    1.99    1.07
 -12 -13  -2    5.19    1.35
  12  13   2    6.23    1.41
   0 -14  -2   27.69    2.55
   0  14   2   25.80    2.36
  -1 -14  -2    5.13    1.27
   1  14   2    4.00    1.14
  -2 -14  -2    0.92    0.81
   2  14   2    0.81    0.85
  -3 -14  -2    2.88    0.96
  -4 -14  -2   28.59    2.02
   4  14   2   31.84    2.20
  -5 -14  -2   23.85    1.84
   5  14   2   18.10    1.83
  -6 -14  -2    1.02    0.78
   6  14   2    2.66    0.93
   6  14   2    2.44    0.88
   6  14   2    0.90    0.70
  -7 -14  -2   -0.52    0.58
   7  14   2   -0.66    0.70
   7  14   2    0.42    0.76
  -8 -14  -2   15.56    1.81
   8  14   2   13.65    1.71
   8  14   2   15.36    1.72
  -9 -14  -2   11.69    1.67
   9  14   2   11.81    1.65
 -10 -14  -2    7.68    1.49
  10  14   2    5.62    1.34
   3  15   2    2.79    1.05
   4  15   2    0.28    0.81
  -5 -15  -2    6.95    1.31
   5  15   2    7.12    1.33
   6  15   2    7.33    1.27
   6  15   2    4.90    1.07
   7  15   2    8.36    1.38
   7  15   2    6.68    1.27
   7  13  -3    4.45    1.23
   7  13  -3    2.78    1.06
  -7 -13   3    4.05    1.17
   6  13  -3    4.29    1.11
  -6 -13   3    2.75    1.10
   5  13  -3   14.16    1.78
  -5 -13   3   15.14    1.92
   4  13  -3   -0.49    0.75
  -4 -13   3   -0.20    0.82
   3  13  -3    0.39    0.84
  -3 -13   3    0.37    0.84
   2  13  -3    0.11    0.81
  -2 -13   3    1.85    0.99
   1  13  -3   10.49    1.68
  -1 -13   3   13.26    1.80
   9  12  -3    8.32    1.61
   9  12  -3   12.74    1.82
  -9 -12   3   14.35    1.88
   8  12  -3   19.29    2.14
   8  12  -3   20.14    2.09
  -8 -12   3   17.64    2.01
   7  12  -3    5.00    1.19
   7  12  -3    6.82    1.36
  -7 -12   3    8.47    1.43
   6  12  -3    1.12    0.74
  -6 -12   3    0.76    0.81
  -6 -12   3   -0.33    0.73
   5  12  -3    3.65    1.02
  -5 -12   3    2.89    1.07
  -5 -12   3    4.25    1.05
   4  12  -3   16.92    1.85
  -4 -12   3   16.92    1.90
   3  12  -3   29.52    2.15
  -3 -12   3   29.32    2.18
   2  12  -3    3.15    1.02
  -2 -12   3    3.36    1.03
   1  12  -3   -0.16    0.76
  -1 -12   3    1.14    0.91
   0  12  -3    2.91    1.09
   0 -12   3    3.55    1.10
  -1  12  -3    8.74    1.55
   1 -12   3    7.63    1.43
  -2  12  -3   13.10    1.83
   2 -12   3   13.29    1.81
  10  11  -3    3.78    1.25
 -10 -11   3    3.82    1.21
   9  11  -3    0.02    0.85
   9  11  -3    0.82    0.91
  -9 -11   3    0.49    0.83
   8  11  -3   27.37    2.13
   8  11  -3   24.37    2.20
  -8 -11   3   24.98    2.28
   7  11  -3    2.54    0.94
   7  11  -3    1.57    0.89
   7  11  -3    2.26    0.80
  -7 -11   3    3.47    1.01
   6  11  -3   21.97    1.70
  -6 -11   3   23.88    1.78
  -6 -11   3   20.05    2.03
   5  11  -3    2.43    0.85
  -5 -11   3    0.76    0.80
  -5 -11   3    2.67    0.84
   4  11  -3    0.04    0.65
  -4 -11   3    1.33    0.66
  -4 -11   3   -0.13    0.70
   3  11  -3    7.54    1.30
  -3 -11   3    7.61    1.30
   2  11  -3    9.68    1.44
  -2 -11   3   12.29    1.58
   1  11  -3   24.86    2.00
  -1 -11   3   23.98    1.92
   0  11  -3    4.20    1.15
   0 -11   3    4.28    1.13
  -1  11  -3   -0.13    0.70
   1 -11   3   -0.17    0.71
  -2  11  -3    0.42    0.87
   2 -11   3    0.96    0.85
  -3  11  -3   16.22    1.97
   3 -11   3   17.08    1.98
  -4  11  -3   13.77    1.67
  -4  11  -3   11.03    1.72
   4 -11   3    9.77    1.56
  11  10  -3   19.64    2.27
 -11 -10   3   19.42    2.14
  10  10  -3    4.94    1.23
 -10 -10   3    4.72    1.20
   9  10  -3   11.22    1.66
   9  10  -3   11.17    1.56
  -9 -10   3   11.05    1.51
   8  10  -3   -0.24    0.72
   8  10  -3   -0.07    0.71
  -8 -10   3   -0.47    0.63
   7  10  -3    5.96    1.00
   7  10  -3    6.25    1.25
   7  10  -3    5.36    1.14
  -7 -10   3    5.15    1.11
   6  10  -3    9.20    1.21
  -6 -10   3    9.41    1.29
  -6 -10   3    6.85    1.20
   5  10  -3    5.73    0.99
  -5 -10   3    2.58    0.87
  -5 -10   3    3.96    0.90
   4  10  -3   23.79    1.72
  -4 -10   3   26.20    1.68
  -4 -10   3   21.98    1.77
   3  10  -3    2.22    0.79
  -3 -10   3    1.44    0.62
  -3 -10   3    1.82    0.77
   2  10  -3   24.81    1.83
  -2 -10   3   25.55    1.83
   1  10  -3   21.08    1.73
  -1 -10   3   21.89    1.73
   0  10  -3   28.40    2.00
   0 -10   3   30.51    2.05
  -1  10  -3    9.15    1.18
  -1  10  -3    6.56    1.28
   1 -10   3    8.13    1.29
  -2  10  -3    0.46    0.74
  -2  10  -3    0.69    0.65
   2 -10   3    0.79    0.77
  -3  10  -3    8.08    1.23
  -3  10  -3    9.01    1.52
   3 -10   3    9.57    1.44
  -4  10  -3   31.50    2.14
  -4  10  -3   28.33    2.26
   4 -10   3   29.86    2.23
  -5  10  -3   25.22    2.09
  -5  10  -3   29.12    2.33
   5 -10   3   26.93    2.17
  -6  10  -3    4.41    1.25
  -6  10  -3    5.07    1.31
   6 -10   3    3.34    1.11
  12   9  -3    6.88    1.43
 -12  -9   3    5.92    1.36
  11   9  -3    1.63    1.01
 -11  -9   3    3.45    1.09
  10   9  -3    2.19    0.95
 -10  -9   3    0.68    0.85
   9   9  -3   13.43    1.63
  -9  -9   3   15.89    1.83
   8   9  -3   14.32    1.70
   8   9  -3   16.38    1.72
  -8  -9   3   14.59    1.64
   7   9  -3   12.54    1.25
   7   9  -3    9.10    1.29
   7   9  -3   10.44    1.35
  -7  -9   3   11.22    1.48
   6   9  -3    1.93    0.70
  -6  -9   3    3.57    0.89
   5   9  -3    8.96    1.11
  -5  -9   3    9.75    1.25
  -5  -9   3    7.96    1.17
   4   9  -3   62.23    2.46
  -4  -9   3   56.47    2.53
  -4  -9   3   60.67    2.39
   3   9  -3   36.31    1.94
  -3  -9   3   39.64    2.07
  -3  -9   3   39.32    1.83
   2   9  -3   13.43    1.48
  -2  -9   3   12.71    1.18
  -2  -9   3   10.22    1.26
   1   9  -3    0.84    0.60
  -1  -9   3   -0.06    0.59
   0   9  -3    6.21    1.05
   0   9  -3    6.93    0.91
   0  -9   3    7.68    1.20
  -1   9  -3   11.13    1.44
  -1   9  -3    9.97    1.10
   1  -9   3   11.68    1.43
  -2   9  -3   21.94    1.51
  -2   9  -3   19.88    1.92
   2  -9   3   21.20    1.72
  -3   9  -3   14.86    1.49
  -3   9  -3   12.64    1.54
   3  -9   3   16.59    1.76
  -4   9  -3   -1.23    0.59
  -4   9  -3    0.33    0.74
   4  -9   3    1.03    0.78
  -5   9  -3   11.88    1.66
  -5   9  -3   10.20    1.50
   5  -9   3   13.97    1.71
  -6   9  -3   18.22    1.94
  -6   9  -3   17.22    1.91
   6  -9   3   15.96    1.83
  -7   9  -3   23.38    2.27
  -7   9  -3   22.60    2.25
   7  -9   3   26.06    2.12
  13   8  -3   -0.86    0.86
 -13  -8   3    1.16    0.95
  12   8  -3    2.82    1.04
 -12  -8   3    4.26    1.27
  11   8  -3   15.43    1.94
 -11  -8   3   13.47    1.78
  10   8  -3    5.62    1.17
 -10  -8   3    2.98    1.04
   9   8  -3    1.06    0.83
  -9  -8   3   -0.18    0.64
   8   8  -3    4.13    0.73
   8   8  -3    3.00    0.95
   8   8  -3    2.17    0.84
  -8  -8   3    3.98    0.97
   7   8  -3   39.32    2.14
   7   8  -3   37.39    1.71
   7   8  -3   32.96    1.94
  -7  -8   3   41.85    2.18
   6   8  -3    2.94    0.69
  -6  -8   3    2.39    0.78
   5   8  -3    2.94    0.70
  -5  -8   3    2.23    0.68
  -5  -8   3    3.10    0.81
   4   8  -3   45.23    1.98
  -4  -8   3   40.25    1.99
  -4  -8   3   41.06    1.89
   3   8  -3   45.01    2.01
  -3  -8   3   43.46    1.89
  -3  -8   3   47.22    2.13
   2   8  -3   21.37    1.06
   2   8  -3   21.17    1.47
  -2  -8   3   26.05    1.37
  -2  -8   3   22.26    1.53
   1   8  -3    9.91    0.82
   1   8  -3   11.86    1.33
  -1  -8   3   10.93    1.02
  -1  -8   3    9.82    1.17
   0   8  -3    1.43    0.64
   0   8  -3    1.31    0.47
   0  -8   3    0.71    0.56
  -1   8  -3   -0.06    0.58
  -1   8  -3    1.10    0.52
   1  -8   3    0.27    0.61
  -2   8  -3   36.26    2.03
  -2   8  -3   30.63    1.63
   2  -8   3   33.24    1.93
  -3   8  -3    6.04    0.99
  -3   8  -3    6.42    1.12
   3  -8   3    5.98    1.09
  -4   8  -3    9.11    1.22
   4  -8   3    7.30    1.15
  -5   8  -3    3.41    0.97
   5  -8   3    4.03    0.99
  -6   8  -3    3.90    1.08
   6  -8   3    1.32    0.83
  -7   8  -3    1.33    0.94
   7  -8   3    3.28    1.01
  -8   8  -3    2.68    1.12
   8  -8   3    3.35    1.10
  13   7  -3    7.41    1.46
 -13  -7   3    3.70    1.08
  12   7  -3    3.60    1.15
 -12  -7   3    2.67    1.07
  11   7  -3    7.30    1.32
 -11  -7   3    8.93    1.52
  10   7  -3   26.42    1.99
 -10  -7   3   27.69    2.04
   9   7  -3   15.22    1.61
  -9  -7   3   16.61    1.74
   8   7  -3    0.29    0.43
   8   7  -3   -0.05    0.58
  -8  -7   3    0.51    0.65
   7   7  -3    1.04    0.50
   7   7  -3    0.63    0.61
   7   7  -3    0.07    0.55
  -7  -7   3   -0.01    0.54
   6   7  -3   41.51    1.99
   6   7  -3   42.23    2.03
   6   7  -3   39.36    1.69
  -6  -7   3   40.20    2.00
   5   7  -3   35.16    1.65
  -5  -7   3   39.43    1.92
  -5  -7   3   39.69    1.89
   4   7  -3   33.36    1.59
  -4  -7   3   35.60    1.69
  -4  -7   3   33.19    1.75
   3   7  -3    9.21    1.02
   3   7  -3    7.90    0.58
  -3  -7   3    7.47    0.91
  -3  -7   3    9.02    1.11
   2   7  -3   22.54    1.39
   2   7  -3   21.34    0.95
  -2  -7   3   21.96    1.23
  -2  -7   3   19.16    1.29
   1   7  -3   35.48    1.32
   1   7  -3   34.00    1.74
  -1  -7   3   35.91    1.45
  -1  -7   3   33.07    1.72
   0   7  -3   78.49    2.24
   0   7  -3   78.99    2.70
   0  -7   3   79.14    2.13
   0  -7   3   76.36    2.64
  -1   7  -3   49.77    2.18
  -1   7  -3   50.95    1.86
   1  -7   3   52.93    2.19
   1  -7   3   49.14    1.57
  -2   7  -3   43.35    1.84
  -2   7  -3   45.02    2.10
   2  -7   3   44.57    2.06
  -3   7  -3    0.61    0.54
   3  -7   3    0.70    0.59
  -4   7  -3   12.78    1.36
   4  -7   3   12.86    1.46
  -5   7  -3   19.07    1.57
   5  -7   3   21.59    1.89
   5  -7   3   22.04    1.68
  -6   7  -3   25.87    1.91
   6  -7   3   28.00    1.92
   6  -7   3   25.61    1.85
  -7   7  -3    0.08    0.71
   7  -7   3    3.46    0.97
   7  -7   3    1.62    0.85
  -8   7  -3    0.06    0.75
   8  -7   3   -0.27    0.69
   8  -7   3   -0.51    0.70
  -9   7  -3    6.77    1.38
   9  -7   3    6.34    1.21
   9  -7   3    6.39    1.30
  13   6  -3    3.29    1.14
 -13  -6   3    4.13    1.20
  12   6  -3   13.86    1.77
 -12  -6   3   18.77    1.96
  11   6  -3    1.55    0.84
 -11  -6   3   -0.06    0.74
  10   6  -3    8.85    1.38
 -10  -6   3    9.20    1.38
   9   6  -3   16.80    1.69
  -9  -6   3   15.25    1.60
   8   6  -3   36.34    1.56
   8   6  -3   35.58    1.97
  -8  -6   3   38.13    2.07
   7   6  -3   11.68    1.31
   7   6  -3   12.92    1.40
   7   6  -3   12.22    1.06
  -7  -6   3   12.09    1.32
   6   6  -3    4.42    0.69
   6   6  -3    4.59    0.86
   6   6  -3    3.46    0.75
  -6  -6   3    2.92    0.77
   5   6  -3    0.69    0.46
  -5  -6   3    1.93    0.63
  -5  -6   3    1.33    0.54
  -5  -6   3    2.16    0.31
   4   6  -3    5.18    0.75
  -4  -6   3    4.33    0.80
  -4  -6   3    3.91    0.74
   3   6  -3   49.16    1.85
   3   6  -3   49.27    1.26
  -3  -6   3   49.64    1.96
  -3  -6   3   47.81    1.81
   2   6  -3    6.18    0.54
   2   6  -3    7.80    0.90
  -2  -6   3    5.99    0.85
  -2  -6   3    5.94    0.74
   1   6  -3   -0.72    0.31
   1   6  -3   -0.26    0.21
  -1  -6   3   -0.14    0.39
  -1  -6   3    0.27    0.34
   0   6  -3   -0.37    0.26
   0   6  -3   -0.28    0.38
   0  -6   3    0.46    0.32
   0  -6   3   -0.04    0.40
  -1   6  -3   81.53    2.28
  -1   6  -3   75.57    2.58
   1  -6   3   81.33    1.95
   1  -6   3   80.58    2.60
  -2   6  -3   24.86    1.49
  -2   6  -3   27.23    1.36
   2  -6   3   25.61    1.50
   2  -6   3   26.45    0.96
  -3   6  -3   19.52    1.26
   3  -6   3   18.41    1.34
  -4   6  -3    1.68    0.64
   4  -6   3    2.44    0.71
   4  -6   3    2.19    0.70
  -5   6  -3    5.58    0.97
   5  -6   3    5.75    1.01
   5  -6   3    5.14    0.94
  -6   6  -3   40.27    2.15
   6  -6   3   44.62    2.25
   6  -6   3   41.03    2.12
  -7   6  -3   16.19    1.68
   7  -6   3   21.36    1.70
   7  -6   3   19.01    1.53
  -8   6  -3   18.16    1.84
   8  -6   3   21.63    2.04
   8  -6   3   25.64    1.79
  -9   6  -3    6.09    1.29
   9  -6   3    7.08    1.21
   9  -6   3    5.73    1.20
 -10   6  -3    1.21    0.94
  10  -6   3    1.74    0.89
  10  -6   3    1.03    0.89
  14   5  -3    2.90    1.20
 -14  -5   3    1.18    1.01
  13   5  -3   14.73    1.90
 -13  -5   3   14.61    1.81
  12   5  -3   10.38    1.55
 -12  -5   3    8.80    1.38
  11   5  -3    2.49    0.90
 -11  -5   3    2.63    0.93
  10   5  -3    1.37    0.75
 -10  -5   3    1.12    0.77
   9   5  -3    2.81    0.86
   9   5  -3    1.29    0.50
  -9  -5   3    1.00    0.70
   8   5  -3    7.15    1.05
   8   5  -3    7.65    0.83
  -8  -5   3    7.00    1.07
   7   5  -3   10.92    0.97
   7   5  -3    8.70    1.06
  -7  -5   3   10.28    1.17
  -7  -5   3   10.38    0.70
   6   5  -3   17.31    1.20
   6   5  -3   16.86    1.02
   6   5  -3   16.83    1.24
  -6  -5   3   16.31    0.74
  -6  -5   3   13.86    1.14
   5   5  -3   16.35    1.12
   5   5  -3   17.76    1.03
   5   5  -3   18.00    1.21
  -5  -5   3   18.19    1.18
  -5  -5   3   18.19    0.68
   4   5  -3   16.12    1.01
  -4  -5   3   15.55    1.08
  -4  -5   3   15.13    1.09
  -4  -5   3   14.67    0.55
   3   5  -3    5.61    0.37
   3   5  -3    5.77    0.75
  -3  -5   3    5.76    0.74
  -3  -5   3    6.64    0.85
   2   5  -3   38.22    1.02
   2   5  -3   36.97    1.51
  -2  -5   3   38.95    1.48
  -2  -5   3   39.69    1.60
   1   5  -3   23.89    0.88
   1   5  -3   24.89    1.27
  -1  -5   3   23.38    1.08
  -1  -5   3   23.93    1.28
   0   5  -3   16.00    1.09
   0   5  -3   18.22    0.87
   0  -5   3   16.51    0.85
   0  -5   3   15.39    1.06
  -1   5  -3   -0.43    0.37
  -1   5  -3    0.45    0.34
   1  -5   3    0.19    0.39
   1  -5   3   -0.15    0.22
  -2   5  -3    8.25    0.92
  -2   5  -3    9.69    0.89
   2  -5   3    8.64    0.50
   2  -5   3    6.16    0.81
  -3   5  -3   50.22    1.85
   3  -5   3   47.20    1.97
  -4   5  -3   15.71    1.19
   4  -5   3   15.57    1.41
   4  -5   3   16.39    1.26
  -5   5  -3    2.09    0.68
   5  -5   3    2.10    0.65
   5  -5   3    1.87    0.65
  -6   5  -3    0.95    0.63
   6  -5   3    0.58    0.57
   6  -5   3    0.10    0.50
  -7   5  -3   12.41    1.45
   7  -5   3   12.46    1.43
   7  -5   3   12.55    1.30
  -8   5  -3   52.59    2.62
   8  -5   3   46.23    2.39
   8  -5   3   50.23    2.30
  -9   5  -3    3.49    1.03
   9  -5   3    2.30    0.91
   9  -5   3    3.25    0.87
 -10   5  -3    4.64    1.21
  10  -5   3    7.80    1.42
  10  -5   3    5.40    1.04
 -11   5  -3    8.36    1.59
  11  -5   3    5.13    1.18
  14   4  -3    7.03    1.45
 -14  -4   3   10.54    1.58
  13   4  -3    3.80    1.20
 -13  -4   3    4.31    1.15
  12   4  -3   -0.62    0.66
 -12  -4   3    1.59    0.87
  11   4  -3    1.06    0.76
 -11  -4   3    1.72    0.76
  10   4  -3    7.95    1.19
 -10  -4   3    7.08    1.14
   9   4  -3    1.65    0.72
   9   4  -3    1.49    0.53
  -9  -4   3    1.80    0.70
  -9  -4   3    2.05    0.58
   8   4  -3   27.65    1.62
   8   4  -3   29.14    1.30
  -8  -4   3   29.21    1.26
  -8  -4   3   27.05    1.63
   7   4  -3    5.94    0.70
   7   4  -3    6.89    0.96
  -7  -4   3    4.65    0.81
  -7  -4   3    4.88    0.58
   6   4  -3   19.01    1.04
   6   4  -3   19.30    1.26
   6   4  -3   19.38    1.24
  -6  -4   3   18.40    0.82
  -6  -4   3   17.37    1.23
   5   4  -3   48.60    1.62
   5   4  -3   48.40    1.87
   5   4  -3   46.51    1.79
  -5  -4   3   47.17    1.84
  -5  -4   3   48.28    1.21
   4   4  -3   50.39    1.65
  -4  -4   3   51.31    1.84
  -4  -4   3   50.84    1.10
  -4  -4   3   47.58    1.81
   3   4  -3   33.83    1.35
  -3  -4   3   32.92    1.41
  -3  -4   3   33.79    1.45
  -3  -4   3   35.35    0.77
   2   4  -3    6.59    0.35
   2   4  -3    6.21    0.71
  -2  -4   3    6.72    0.78
  -2  -4   3    6.50    0.70
   1   4  -3    1.24    0.45
   1   4  -3    1.73    0.29
  -1  -4   3    0.98    0.43
  -1  -4   3    1.95    0.43
   0   4  -3   41.63    1.58
   0   4  -3   42.66    1.23
   0  -4   3   45.07    1.60
   0  -4   3   42.18    1.31
  -1   4  -3   47.85    1.71
  -1   4  -3   45.43    1.43
   1  -4   3   47.08    1.70
   1  -4   3   47.33    1.28
  -2   4  -3   36.90    1.39
  -2   4  -3   38.05    1.57
   2  -4   3   38.65    1.00
   2  -4   3   37.62    1.57
  -3   4  -3    0.48    0.42
   3  -4   3    0.15    0.41
  -4   4  -3    1.17    0.52
   4  -4   3    0.80    0.45
   4  -4   3    0.26    0.45
  -5   4  -3   56.42    2.18
   5  -4   3   59.50    2.26
   5  -4   3   57.45    2.11
  -6   4  -3    2.00    0.66
   6  -4   3    1.65    0.61
   6  -4   3    1.75    0.66
  -7   4  -3   54.53    2.41
   7  -4   3   57.63    2.41
   7  -4   3   53.03    2.16
  -8   4  -3   -0.30    0.62
   8  -4   3   -0.33    0.42
   8  -4   3   -0.77    0.52
  -9   4  -3    8.73    1.40
   9  -4   3    6.33    1.01
   9  -4   3    8.50    1.28
 -10   4  -3   18.32    1.89
  10  -4   3   19.75    1.49
  10  -4   3   16.31    1.77
 -11   4  -3    7.45    1.52
  11  -4   3    4.27    1.16
 -12   4  -3    9.06    1.61
  12  -4   3    5.49    1.25
  14   3  -3   12.96    1.83
 -14  -3   3   13.11    1.71
  13   3  -3   17.31    1.94
 -13  -3   3   19.55    1.93
  12   3  -3    2.07    0.87
 -12  -3   3    1.68    0.77
  11   3  -3    0.68    0.72
 -11  -3   3    0.00    0.53
 -11  -3   3    0.25    0.63
  10   3  -3    2.44    0.78
 -10  -3   3    2.98    0.87
 -10  -3   3    3.23    0.76
   9   3  -3   32.76    1.42
   9   3  -3   30.82    1.78
  -9  -3   3   33.30    1.84
  -9  -3   3   31.78    1.51
   8   3  -3    6.67    0.98
   8   3  -3    6.98    0.77
  -8  -3   3    7.80    0.84
  -8  -3   3    5.70    0.91
   7   3  -3    3.41    0.56
   7   3  -3    2.54    0.64
  -7  -3   3    2.26    0.62
  -7  -3   3    2.43    0.50
   6   3  -3    6.27    0.83
   6   3  -3    7.55    0.75
  -6  -3   3    5.90    0.61
  -6  -3   3    7.65    0.94
   5   3  -3   29.87    1.19
   5   3  -3   28.50    1.33
   5   3  -3   26.99    1.34
  -5  -3   3   27.23    1.38
  -5  -3   3   28.35    0.96
   4   3  -3    9.86    0.87
   4   3  -3   11.36    0.77
   4   3  -3    8.87    0.85
  -4  -3   3    8.66    0.84
  -4  -3   3    9.55    0.47
   3   3  -3    2.91    0.51
  -3  -3   3    2.60    0.54
  -3  -3   3    2.13    0.51
  -3  -3   3    2.15    0.20
   2   3  -3   35.45    1.30
  -2  -3   3   37.05    1.32
  -2  -3   3   34.35    1.30
   1   3  -3   48.75    1.56
   1   3  -3   51.56    1.03
  -1  -3   3   47.11    1.46
  -1  -3   3   49.44    1.59
   0   3  -3   73.43    1.57
   0   3  -3   73.16    2.00
   0  -3   3   72.72    1.77
   0  -3   3   72.17    1.98
  -1   3  -3   12.86    0.88
  -1   3  -3   14.18    0.72
   1  -3   3   12.95    0.87
   1  -3   3   13.68    0.65
  -2   3  -3  132.63    2.90
  -2   3  -3  135.24    3.12
   2  -3   3  136.12    2.45
   2  -3   3  133.77    3.11
  -3   3  -3   33.07    1.34
   3  -3   3   33.07    0.77
   3  -3   3   30.87    1.41
  -4   3  -3    0.43    0.43
   4  -3   3    0.12    0.33
   4  -3   3    0.54    0.44
  -5   3  -3    7.16    0.94
   5  -3   3    5.32    0.75
   5  -3   3    5.91    0.85
  -6   3  -3    0.66    0.56
   6  -3   3    0.55    0.49
   6  -3   3    0.74    0.44
  -7   3  -3   11.23    1.30
   7  -3   3   12.33    1.32
   7  -3   3   11.48    1.12
  -8   3  -3   10.74    1.36
   8  -3   3   12.26    1.21
   8  -3   3    9.70    1.24
  -9   3  -3   -0.31    0.62
   9  -3   3    0.46    0.47
   9  -3   3    0.35    0.58
 -10   3  -3   -0.11    0.62
  10  -3   3    1.38    0.79
  10  -3   3    0.81    0.55
 -11   3  -3    5.53    1.26
  11  -3   3    3.71    1.06
 -12   3  -3    8.15    1.55
  12  -3   3    8.44    1.56
 -13   3  -3    0.70    1.01
  13  -3   3    1.96    0.95
  14   2  -3   -0.52    0.84
  13   2  -3    7.67    1.42
 -13  -2   3    8.58    1.40
  12   2  -3    9.74    1.47
 -12  -2   3    7.73    1.26
 -12  -2   3    8.67    1.25
  11   2  -3   13.38    1.60
 -11  -2   3   11.42    1.38
 -11  -2   3   13.51    1.42
  10   2  -3    0.78    0.64
 -10  -2   3    0.07    0.53
 -10  -2   3   -0.17    0.51
   9   2  -3   -0.21    0.31
   9   2  -3    0.25    0.57
  -9  -2   3    0.58    0.53
  -9  -2   3    0.42    0.53
   8   2  -3   28.91    1.62
   8   2  -3   29.60    1.30
  -8  -2   3   27.36    1.55
  -8  -2   3   30.84    1.46
   7   2  -3   19.48    1.03
   7   2  -3   18.91    1.24
  -7  -2   3   18.62    1.25
  -7  -2   3   18.38    1.05
   6   2  -3   53.01    1.65
   6   2  -3   49.56    1.88
  -6  -2   3   53.78    1.96
  -6  -2   3   53.97    1.63
   5   2  -3    0.67    0.42
   5   2  -3    0.46    0.31
  -5  -2   3    0.37    0.38
  -5  -2   3    0.73    0.33
   4   2  -3    2.27    0.44
   4   2  -3    2.59    0.53
   4   2  -3    2.74    0.56
  -4  -2   3    2.55    0.36
  -4  -2   3    1.85    0.48
   3   2  -3   49.59    1.47
  -3  -2   3   50.04    1.06
  -3  -2   3   47.73    1.59
   2   2  -3   49.31    1.47
  -2  -2   3   49.41    1.54
  -2  -2   3   52.54    1.55
   1   2  -3   35.25    1.23
  -1  -2   3   34.17    1.18
  -1  -2   3   36.06    1.22
   0   2  -3    3.41    0.31
   0   2  -3    3.18    0.50
   0  -2   3    2.55    0.43
   0  -2   3    3.35    0.44
  -1   2  -3    0.28    0.34
  -1   2  -3    0.65    0.29
   1  -2   3    0.39    0.25
   1  -2   3    0.60    0.34
  -2   2  -3   66.73    1.71
  -2   2  -3   67.24    1.84
   2  -2   3   66.79    1.88
   2  -2   3   67.48    1.43
  -3   2  -3   69.86    1.95
  -3   2  -3   72.68    1.99
   3  -2   3   72.56    1.42
   3  -2   3   74.30    2.08
  -4   2  -3   62.26    1.95
   4  -2   3   61.86    1.21
   4  -2   3   59.34    1.80
   4  -2   3   61.57    1.97
  -5   2  -3    9.49    0.96
   5  -2   3    8.90    0.41
   5  -2   3    8.24    0.92
   5  -2   3    7.45    0.76
  -6   2  -3   11.22    1.09
   6  -2   3   10.11    0.80
   6  -2   3    8.91    0.97
   6  -2   3   10.17    0.48
  -7   2  -3   15.52    1.25
   7  -2   3   15.84    1.24
   7  -2   3   17.25    1.08
  -8   2  -3   10.97    1.29
   8  -2   3   10.65    1.02
   8  -2   3   10.01    1.20
  -9   2  -3   49.70    2.37
   9  -2   3   43.75    1.82
   9  -2   3   46.05    2.25
 -10   2  -3    2.99    0.89
  10  -2   3    4.08    0.81
  10  -2   3    1.97    0.81
 -11   2  -3    1.04    0.79
  11  -2   3    0.96    0.80
 -12   2  -3    7.25    1.43
  12  -2   3    6.30    1.27
 -13   2  -3   11.55    1.82
  13  -2   3   11.38    1.79
  13   1  -3   -0.43    0.75
 -13  -1   3    0.64    0.71
  12   1  -3    0.34    0.80
 -12  -1   3    0.53    0.73
 -12  -1   3    1.12    0.71
  11   1  -3    5.17    1.09
 -11  -1   3    3.90    0.95
 -11  -1   3    4.64    0.96
  10   1  -3    2.36    0.60
  10   1  -3    1.76    0.76
 -10  -1   3    2.05    0.73
 -10  -1   3    3.23    0.84
   9   1  -3   12.93    0.99
   9   1  -3   13.91    1.35
  -9  -1   3   15.53    1.27
  -9  -1   3   15.71    1.40
   8   1  -3    0.28    0.35
   8   1  -3   -0.06    0.45
  -8  -1   3    0.33    0.48
  -8  -1   3    0.04    0.44
   7   1  -3    3.15    0.69
   7   1  -3    5.08    0.68
  -7  -1   3    5.09    0.80
  -7  -1   3    4.27    0.70
   6   1  -3   21.23    1.04
   6   1  -3   20.45    1.18
  -6  -1   3   20.85    1.19
  -6  -1   3   21.54    1.09
   5   1  -3   39.22    1.50
   5   1  -3   38.32    1.34
  -5  -1   3   36.73    1.29
  -5  -1   3   39.10    1.52
   4   1  -3   21.37    1.02
   4   1  -3   20.66    0.95
  -4  -1   3   21.33    1.08
  -4  -1   3   20.35    0.86
   3   1  -3    4.33    0.54
   3   1  -3    4.85    0.54
   3   1  -3    4.82    0.53
  -3  -1   3    5.64    0.44
  -3  -1   3    5.47    0.65
   2   1  -3   12.05    0.73
  -2  -1   3   13.04    0.45
  -2  -1   3   12.15    0.71
  -2  -1   3   12.91    0.76
   1   1  -3   37.86    1.18
  -1  -1   3   36.73    1.13
  -1  -1   3   39.13    1.21
   0   1  -3   29.60    0.67
   0   1  -3   29.53    1.05
   0  -1   3   26.16    0.94
  -1   1  -3    1.30    0.30
  -1   1  -3    1.42    0.38
   1  -1   3    1.46    0.31
   1  -1   3    1.35    0.34
  -2   1  -3    0.42    0.32
  -2   1  -3    0.43    0.32
   2  -1   3    0.56    0.25
   2  -1   3    1.14    0.39
  -3   1  -3    3.45    0.50
  -3   1  -3    3.70    0.55
   3  -1   3    4.70    0.40
   3  -1   3    4.18    0.60
  -4   1  -3   32.62    1.31
   4  -1   3   32.23    1.32
   4  -1   3   28.93    0.85
  -5   1  -3    0.61    0.45
   5  -1   3    0.90    0.32
   5  -1   3    0.66    0.45
   5  -1   3    0.60    0.24
  -6   1  -3   34.07    1.57
   6  -1   3   33.73    1.27
   6  -1   3   29.78    1.46
   6  -1   3   32.28    0.99
  -7   1  -3    1.80    0.60
   7  -1   3    0.44    0.34
   7  -1   3    0.93    0.50
   7  -1   3    0.34    0.25
  -8   1  -3    0.93    0.52
   8  -1   3   -0.06    0.44
   8  -1   3    0.58    0.40
  -9   1  -3    4.28    0.93
   9  -1   3    3.90    0.65
   9  -1   3    4.05    0.88
 -10   1  -3    5.12    0.97
  10  -1   3    5.66    0.79
  10  -1   3    4.34    0.97
 -11   1  -3   21.46    2.09
  11  -1   3   19.51    1.93
 -12   1  -3   -0.62    0.67
  12  -1   3    0.09    0.70
 -13   1  -3    2.07    1.05
  13  -1   3    0.57    0.82
 -14   1  -3    3.52    1.21
  14  -1   3    2.96    1.14
  13   0  -3    5.15    1.28
 -13   0   3    7.05    1.42
  12   0  -3   14.92    1.78
 -12   0   3   16.21    1.83
  11   0  -3   -0.04    0.67
 -11   0   3    0.43    0.70
 -11   0   3    0.14    0.53
  10   0  -3    6.44    0.89
  10   0  -3    7.67    1.23
 -10   0   3    6.71    1.14
 -10   0   3    5.36    0.90
   9   0  -3    6.40    0.81
   9   0  -3    4.04    0.92
  -9   0   3    6.38    1.03
  -9   0   3    5.22    0.86
   8   0  -3    5.46    0.93
   8   0  -3    5.83    0.76
  -8   0   3    4.43    0.81
  -8   0   3    4.74    0.78
   7   0  -3    5.91    0.73
   7   0  -3    6.23    0.86
  -7   0   3    7.32    0.87
  -7   0   3    7.33    0.91
   6   0  -3   36.05    1.37
   6   0  -3   34.00    1.50
  -6   0   3   36.54    1.49
  -6   0   3   34.76    1.46
   5   0  -3    5.77    0.70
   5   0  -3    6.66    0.69
  -5   0   3    4.28    0.64
  -5   0   3    5.95    0.69
   4   0  -3   25.36    1.08
   4   0  -3   24.30    1.05
  -4   0   3   23.24    1.00
  -4   0   3   24.03    1.10
   3   0  -3   78.62    1.93
   3   0  -3   75.73    1.89
  -3   0   3   79.60    2.02
  -3   0   3   78.75    1.80
   2   0  -3   19.74    0.80
   2   0  -3   20.76    0.79
   2   0  -3   18.76    0.85
  -2   0   3   20.76    0.92
  -2   0   3   20.49    0.72
   1   0  -3   93.10    2.01
  -1   0   3   95.60    1.89
  -1   0   3   93.30    1.70
  -1   0   3   92.27    2.05
   0   0  -3   11.65    0.43
   0   0  -3   11.47    0.63
   0   0   3   12.66    0.54
   0   0   3   10.46    0.62
  -1   0  -3   72.81    1.63
  -1   0  -3   74.05    1.49
   1   0   3   71.25    1.58
   1   0   3   73.20    1.56
  -2   0  -3   11.18    0.64
  -2   0  -3   11.56    0.62
   2   0   3   11.42    0.58
   2   0   3   12.60    0.67
  -3   0  -3    0.00    0.24
  -3   0  -3   -0.37    0.30
   3   0   3    0.24    0.35
   3   0   3    0.29    0.25
  -4   0  -3    7.70    0.57
  -4   0  -3    7.97    0.77
   4   0   3    7.50    0.51
   4   0   3    8.73    0.78
  -5   0  -3   13.50    0.95
   5   0   3   13.44    0.66
   5   0   3   13.69    0.89
  -6   0  -3   31.42    1.05
  -6   0  -3   31.18    1.45
   6   0   3   32.72    1.10
   6   0   3   26.69    1.36
  -7   0  -3    1.48    0.34
  -7   0  -3    1.92    0.61
   7   0   3    2.17    0.64
   7   0   3    1.58    0.37
  -8   0  -3    8.64    0.68
  -8   0  -3    8.44    1.01
   8   0   3    8.63    0.69
   8   0   3    8.15    1.00
  -9   0  -3   -0.29    0.45
  -9   0  -3   -0.39    0.25
   9   0   3   -0.01    0.29
   9   0   3   -0.34    0.44
 -10   0  -3    5.29    1.06
  10   0   3    4.60    0.97
 -11   0  -3   28.14    1.89
  11   0   3   28.19    1.87
 -12   0  -3    2.68    0.95
  12   0   3    2.78    0.95
 -13   0  -3    4.07    1.14
  13   0   3    4.91    1.14
 -14   0  -3    1.25    0.96
  14   0   3    0.34    0.83
  13  -1  -3    4.69    1.22
 -13   1   3    6.78    1.40
  12  -1  -3   27.24    2.10
 -12   1   3   27.96    2.15
  11  -1  -3   11.33    1.50
 -11   1   3   13.33    1.66
  10  -1  -3   14.82    1.33
  10  -1  -3   14.78    1.56
 -10   1   3   15.98    1.72
 -10   1   3   13.55    1.27
   9  -1  -3    0.39    0.64
   9  -1  -3    0.05    0.43
  -9   1   3   -0.46    0.56
  -9   1   3   -0.01    0.42
   8  -1  -3   20.62    1.23
   8  -1  -3   21.59    1.44
  -8   1   3   21.40    1.27
  -8   1   3   20.31    1.42
   7  -1  -3   37.00    1.54
   7  -1  -3   38.88    1.75
  -7   1   3   35.63    1.53
  -7   1   3   37.96    1.72
   6  -1  -3   12.92    0.91
   6  -1  -3   13.76    1.02
  -6   1   3   13.78    0.93
  -6   1   3   13.91    1.02
   5  -1  -3    6.69    0.74
   5  -1  -3    5.55    0.65
  -5   1   3    5.16    0.71
  -5   1   3    6.03    0.71
   4  -1  -3    7.71    0.73
   4  -1  -3    6.56    0.68
  -4   1   3    7.58    0.75
  -4   1   3    8.34    0.74
   3  -1  -3   47.69    1.46
   3  -1  -3   48.01    1.36
  -3   1   3   47.13    1.43
  -3   1   3   45.04    1.40
   2  -1  -3  138.42    2.80
   2  -1  -3  132.09    2.56
  -2   1   3  140.46    2.69
  -2   1   3  133.38    2.76
   1  -1  -3    8.17    0.62
   1  -1  -3    9.16    0.45
  -1   1   3    8.59    0.61
  -1   1   3    8.36    0.51
   0  -1  -3   30.28    0.95
   0  -1  -3   29.64    0.83
   0   1   3   30.21    0.97
   0   1   3   30.87    0.70
  -1  -1  -3    3.57    0.37
  -1  -1  -3    2.98    0.39
   1   1   3    3.07    0.29
   1   1   3    2.95    0.40
  -2  -1  -3    0.03    0.25
  -2  -1  -3    0.21    0.21
   2   1   3    0.13    0.27
   2   1   3   -0.01    0.23
  -3  -1  -3    5.47    0.42
  -3  -1  -3    4.61    0.51
   3   1   3    5.38    0.49
   3   1   3    5.96    0.58
  -4  -1  -3   28.80    0.84
  -4  -1  -3   27.56    1.15
   4   1   3   27.80    1.10
   4   1   3   28.99    0.98
  -5  -1  -3  140.98    2.83
  -5  -1  -3  139.37    3.18
  -5  -1  -3  141.72    2.60
  -6  -1  -3   28.44    1.09
  -6  -1  -3   29.66    1.38
   6   1   3   29.24    1.34
  -7  -1  -3   19.09    0.94
  -7  -1  -3   17.19    1.12
   7   1   3   17.72    1.17
   7   1   3   17.32    0.73
  -8  -1  -3   11.12    0.80
  -8  -1  -3   11.02    1.16
   8   1   3   11.18    0.66
   8   1   3   14.80    1.37
  -9  -1  -3    9.09    1.15
  -9  -1  -3    8.57    0.82
   9   1   3   10.65    1.26
   9   1   3    8.87    0.65
 -10  -1  -3   17.36    1.61
 -10  -1  -3   20.44    1.14
  10   1   3   20.96    1.54
 -11  -1  -3    3.26    0.68
 -11  -1  -3    2.56    0.84
  11   1   3    3.30    0.92
 -12  -1  -3    5.16    1.10
  12   1   3    2.92    0.97
 -13  -1  -3   15.32    1.80
  13   1   3    9.01    1.53
 -14  -1  -3    5.73    1.34
  14   1   3    4.56    1.29
  12  -2  -3    1.11    0.82
 -12   2   3    1.31    0.93
  11  -2  -3   11.95    1.56
 -11   2   3   12.37    1.60
  10  -2  -3   18.12    1.38
  10  -2  -3   17.41    1.67
 -10   2   3   18.47    1.89
   9  -2  -3    1.83    0.77
   9  -2  -3    3.55    0.73
  -9   2   3    3.12    0.87
  -9   2   3    3.32    0.67
   8  -2  -3    1.10    0.52
   8  -2  -3    1.47    0.62
  -8   2   3    1.22    0.52
  -8   2   3    2.46    0.76
   7  -2  -3   65.53    2.20
   7  -2  -3   64.35    2.27
  -7   2   3   66.36    2.06
  -7   2   3   64.81    2.40
   6  -2  -3   43.71    1.66
   6  -2  -3   42.63    1.67
  -6   2   3   41.51    1.51
  -6   2   3   42.12    1.79
   5  -2  -3    7.48    0.79
   5  -2  -3    6.59    0.77
  -5   2   3    6.90    0.82
  -5   2   3    9.44    0.80
   4  -2  -3    4.14    0.57
   4  -2  -3    4.35    0.62
  -4   2   3    5.04    0.58
  -4   2   3    4.65    0.66
   3  -2  -3   68.49    1.72
   3  -2  -3   69.27    1.89
  -3   2   3   68.47    1.92
  -3   2   3   68.57    1.75
   2  -2  -3  238.72    4.42
   2  -2  -3  245.11    4.14
  -2   2   3  243.88    4.32
  -2   2   3  238.17    4.43
   1  -2  -3    1.15    0.35
   1  -2  -3    1.12    0.23
  -1   2   3    1.25    0.36
  -1   2   3    0.80    0.33
   0  -2  -3   62.21    1.52
   0  -2  -3   63.31    1.48
   0   2   3   63.58    1.52
  -1  -2  -3   38.06    0.73
  -1  -2  -3   38.50    1.03
  -1  -2  -3   38.40    1.08
   1   2   3   38.33    1.12
   1   2   3   38.60    0.73
  -2  -2  -3    9.52    0.60
  -2  -2  -3    9.58    0.49
   2   2   3    9.51    0.48
   2   2   3    9.53    0.62
  -3  -2  -3  234.87    3.68
  -3  -2  -3  222.08    4.15
   3   2   3  229.09    4.02
   3   2   3  229.94    4.11
  -4  -2  -3   34.04    0.76
  -4  -2  -3   31.59    1.20
  -4  -2  -3   33.59    1.12
   4   2   3   31.55    1.15
  -5  -2  -3  139.31    2.37
  -5  -2  -3  139.05    2.95
  -5  -2  -3  145.12    3.19
   5   2   3  141.92    3.11
  -6  -2  -3   26.80    1.11
  -6  -2  -3   26.97    1.29
  -6  -2  -3   26.13    0.71
   6   2   3   26.01    1.25
  -7  -2  -3   18.85    0.65
  -7  -2  -3   18.98    1.19
  -7  -2  -3   19.03    1.01
   7   2   3   19.15    1.18
  -8  -2  -3    0.35    0.32
  -8  -2  -3    0.96    0.50
   8   2   3    0.04    0.42
  -9  -2  -3    8.87    0.91
  -9  -2  -3    9.39    1.15
   9   2   3    9.00    1.10
 -10  -2  -3   25.97    1.35
 -10  -2  -3   24.95    1.62
  10   2   3   26.98    1.65
 -11  -2  -3    1.52    0.57
 -11  -2  -3    1.14    0.75
  11   2   3    1.21    0.71
 -12  -2  -3   -0.40    0.56
 -12  -2  -3   -0.29    0.41
  12   2   3   -0.60    0.62
 -13  -2  -3    5.79    1.25
  13   2   3    2.58    0.99
 -14  -2  -3   10.38    1.65
  14   2   3    6.83    1.44
 -15  -2  -3   12.68    1.86
  15   2   3   15.64    2.01
  12  -3  -3    1.78    0.89
 -12   3   3    2.01    1.07
  11  -3  -3   -0.03    0.68
 -11   3   3   -1.17    0.77
  10  -3  -3    2.10    0.69
  10  -3  -3    1.19    0.76
 -10   3   3    1.55    0.89
   9  -3  -3    1.71    0.66
   9  -3  -3    1.91    0.78
  -9   3   3    2.38    0.89
   8  -3  -3   15.33    1.21
   8  -3  -3   17.14    1.33
  -8   3   3   16.54    1.07
  -8   3   3   17.54    1.66
   7  -3  -3    5.02    0.86
   7  -3  -3    5.13    0.82
  -7   3   3    4.36    0.63
  -7   3   3    4.21    0.88
   6  -3  -3    3.74    0.68
   6  -3  -3    2.81    0.62
  -6   3   3    4.10    0.81
  -6   3   3    4.79    0.62
   5  -3  -3   24.08    1.18
   5  -3  -3   22.16    1.25
  -5   3   3   22.82    1.33
  -5   3   3   24.36    1.06
   4  -3  -3   35.33    1.44
   4  -3  -3   36.03    1.33
  -4   3   3   37.12    1.24
  -4   3   3   34.53    1.51
   3  -3  -3  122.40    2.85
   3  -3  -3  119.49    2.57
  -3   3   3  117.76    2.90
  -3   3   3  123.09    2.57
   2  -3  -3   30.32    0.96
   2  -3  -3   29.35    1.18
  -2   3   3   29.32    1.21
  -2   3   3   30.37    1.03
   1  -3  -3    0.43    0.21
   1  -3  -3    0.14    0.30
  -1   3   3    0.03    0.33
  -1   3   3    0.05    0.28
   0  -3  -3  101.90    2.25
   0  -3  -3  104.57    1.75
   0  -3  -3  102.25    2.24
   0   3   3  106.18    2.20
  -1  -3  -3   24.13    0.93
  -1  -3  -3   23.47    0.86
   1   3   3   25.18    0.94
   1   3   3   23.49    0.53
   1   3   3   23.26    0.55
  -2  -3  -3   17.58    0.67
  -2  -3  -3   16.65    0.81
   2   3   3   17.12    0.79
   2   3   3   17.94    0.60
  -3  -3  -3    1.25    0.24
  -3  -3  -3    1.15    0.37
   3   3   3    0.74    0.28
  -4  -3  -3    0.88    0.39
  -4  -3  -3    1.10    0.38
  -4  -3  -3    1.12    0.16
   4   3   3    0.98    0.34
  -5  -3  -3  134.15    2.98
  -5  -3  -3  131.29    2.90
   5   3   3  129.74    2.90
  -6  -3  -3   36.88    1.47
  -6  -3  -3   35.81    1.37
   6   3   3   36.31    1.45
  -7  -3  -3   54.70    1.97
  -7  -3  -3   57.19    1.85
   7   3   3   60.40    2.01
  -8  -3  -3    0.13    0.35
  -8  -3  -3    0.82    0.50
   8   3   3   -0.51    0.38
  -9  -3  -3    0.22    0.46
  -9  -3  -3   -0.11    0.40
   9   3   3   -0.40    0.40
 -10  -3  -3    8.07    1.04
 -10  -3  -3   10.28    1.05
  10   3   3    9.03    1.22
 -11  -3  -3    7.79    1.01
 -11  -3  -3    6.44    1.09
  11   3   3    6.14    1.07
 -12  -3  -3   22.92    1.48
 -12  -3  -3   23.78    1.76
  12   3   3   21.87    1.99
 -13  -3  -3    2.19    0.73
 -13  -3  -3    2.31    0.93
  13   3   3    2.26    0.97
 -14  -3  -3    1.50    0.93
  14   3   3   -0.27    0.67
 -15  -3  -3    1.85    0.97
  15   3   3    0.57    1.03
  12  -4  -3    4.53    1.22
 -12   4   3    1.68    1.17
  11  -4  -3   12.59    1.60
  11  -4  -3   16.00    1.65
 -11   4   3   12.04    1.70
  10  -4  -3    3.99    0.89
  10  -4  -3    5.28    1.06
 -10   4   3    0.98    0.91
   9  -4  -3   -0.04    0.47
   9  -4  -3    0.23    0.64
  -9   4   3   -0.83    0.64
   8  -4  -3   11.89    1.24
   8  -4  -3   13.14    1.36
  -8   4   3   10.91    1.35
   7  -4  -3   15.65    1.25
   7  -4  -3   14.98    1.37
  -7   4   3   13.54    1.38
   6  -4  -3   39.10    1.69
   6  -4  -3   38.16    1.75
  -6   4   3   39.15    1.37
  -6   4   3   37.35    1.85
   5  -4  -3    1.07    0.44
   5  -4  -3    0.68    0.44
  -5   4   3    0.99    0.37
  -5   4   3    0.79    0.52
   4  -4  -3    0.47    0.40
   4  -4  -3    0.81    0.40
  -4   4   3    0.75    0.31
  -4   4   3    0.52    0.46
   3  -4  -3   33.20    1.42
   3  -4  -3   34.35    1.24
  -3   4   3   34.75    1.12
  -3   4   3   32.65    1.47
   2  -4  -3   63.09    1.93
   2  -4  -3   65.72    1.61
  -2   4   3   61.93    1.58
  -2   4   3   61.11    1.92
   1  -4  -3   50.67    1.62
   1  -4  -3   52.12    1.28
  -1   4   3   53.22    1.70
  -1   4   3   52.87    1.40
   0  -4  -3    0.84    0.39
   0  -4  -3    1.16    0.25
   0  -4  -3    0.55    0.33
   0   4   3    1.35    0.34
  -1  -4  -3    1.62    0.38
  -1  -4  -3    1.08    0.35
  -1  -4  -3    1.88    0.27
   1   4   3    2.06    0.39
  -2  -4  -3   62.29    1.69
  -2  -4  -3   63.84    1.53
   2   4   3   61.34    1.67
   2   4   3   62.69    1.33
   2   4   3   64.63    1.39
  -3  -4  -3   10.92    0.72
  -3  -4  -3    8.95    0.67
  -3  -4  -3   10.08    0.54
   3   4   3   10.60    0.60
  -4  -4  -3   15.61    0.54
  -4  -4  -3   14.64    0.89
  -4  -4  -3   14.40    0.86
   4   4   3   15.45    0.79
  -5  -4  -3    0.52    0.39
  -5  -4  -3    0.12    0.35
   5   4   3    0.42    0.35
  -6  -4  -3    0.53    0.39
  -6  -4  -3    0.63    0.41
   6   4   3    0.52    0.38
  -7  -4  -3    1.29    0.48
  -7  -4  -3    1.43    0.48
   7   4   3    2.11    0.57
  -8  -4  -3    3.56    0.64
  -8  -4  -3    5.62    0.82
   8   4   3    5.31    0.83
  -9  -4  -3   15.57    1.12
  -9  -4  -3   15.27    1.17
   9   4   3   15.17    1.22
 -10  -4  -3    0.51    0.50
 -10  -4  -3    0.52    0.56
  10   4   3    0.59    0.56
 -11  -4  -3    6.85    1.08
 -11  -4  -3    8.45    1.11
  11   4   3    6.74    1.17
 -12  -4  -3   12.81    1.46
 -12  -4  -3   13.47    1.38
  12   4   3   13.52    1.67
 -13  -4  -3    2.45    0.89
 -13  -4  -3   -0.04    0.50
  13   4   3    1.18    0.93
 -14  -4  -3   13.07    1.48
 -14  -4  -3   13.98    1.76
  14   4   3   14.66    1.91
 -15  -4  -3    0.73    0.85
  15   4   3    0.66    0.95
  11  -5  -3   13.34    1.59
  11  -5  -3   13.67    1.70
 -11   5   3    9.54    1.64
  10  -5  -3   18.36    1.76
  10  -5  -3   16.99    1.74
 -10   5   3   13.26    1.75
   9  -5  -3   19.99    1.60
   9  -5  -3   19.69    1.61
  -9   5   3   16.83    1.81
   8  -5  -3    0.61    0.60
   8  -5  -3    0.78    0.60
  -8   5   3    0.05    0.70
   7  -5  -3    4.21    0.84
   7  -5  -3    4.81    0.85
  -7   5   3    7.39    1.20
   6  -5  -3   34.92    1.65
   6  -5  -3   34.78    1.78
  -6   5   3   39.82    2.03
   5  -5  -3   71.70    2.26
   5  -5  -3   76.03    2.57
  -5   5   3   76.47    1.90
  -5   5   3   72.96    2.63
   4  -5  -3   28.92    1.28
   4  -5  -3   26.92    1.46
  -4   5   3   30.26    1.08
  -4   5   3   28.30    1.55
   3  -5  -3    8.58    0.96
   3  -5  -3    7.28    0.72
  -3   5   3    7.42    0.96
  -3   5   3    7.54    0.62
   2  -5  -3   11.94    0.73
   2  -5  -3   10.04    0.93
  -2   5   3   11.57    0.66
  -2   5   3   11.94    1.08
   1  -5  -3  179.38    3.85
   1  -5  -3  178.99    3.38
  -1   5   3  177.54    3.95
  -1   5   3  185.91    3.45
   0  -5  -3  169.32    3.11
   0  -5  -3  168.00    3.56
   0   5   3  171.29    3.31
  -1  -5  -3   13.03    0.81
  -1  -5  -3   11.73    0.60
  -1  -5  -3   10.21    0.78
   1   5   3   13.24    0.74
  -2  -5  -3    6.49    0.52
  -2  -5  -3    7.25    0.63
  -2  -5  -3    7.39    0.71
   2   5   3    7.08    0.68
  -3  -5  -3   41.22    1.19
  -3  -5  -3   39.56    1.40
  -3  -5  -3   39.89    1.38
   3   5   3   39.17    1.20
   3   5   3   40.07    1.16
  -4  -5  -3  136.51    3.11
  -4  -5  -3  136.17    3.03
  -4  -5  -3  137.89    2.58
   4   5   3  136.10    2.87
  -5  -5  -3   42.79    1.59
  -5  -5  -3   44.79    1.03
  -5  -5  -3   43.51    1.52
   5   5   3   42.33    1.46
  -6  -5  -3    7.06    0.77
  -6  -5  -3    5.09    0.71
   6   5   3    6.24    0.72
  -7  -5  -3    8.93    0.95
  -7  -5  -3    8.98    0.92
   7   5   3    8.90    0.95
  -8  -5  -3   19.61    1.24
  -8  -5  -3   16.71    1.15
   8   5   3   19.38    1.23
  -9  -5  -3   52.82    2.09
  -9  -5  -3   59.79    2.19
   9   5   3   51.42    2.13
 -10  -5  -3   10.03    1.21
 -10  -5  -3    8.54    1.05
  10   5   3   10.35    1.25
 -11  -5  -3   50.59    2.24
 -11  -5  -3   49.90    2.21
  11   5   3   44.66    2.27
 -12  -5  -3    0.60    0.58
 -12  -5  -3    1.22    0.69
  12   5   3   -0.78    0.60
 -13  -5  -3   10.06    1.37
 -13  -5  -3    8.73    1.21
  13   5   3    6.55    1.24
 -14  -5  -3   12.42    1.48
 -14  -5  -3    9.99    1.39
  14   5   3   11.60    1.72
 -15  -5  -3   17.24    1.82
 -15  -5  -3   15.26    1.78
  15   5   3   12.78    1.87
  10  -6  -3    3.38    0.96
  10  -6  -3    2.58    0.95
 -10   6   3    0.85    0.98
   9  -6  -3   12.29    1.51
   9  -6  -3   15.17    1.61
  -9   6   3   16.84    1.94
   8  -6  -3    8.52    1.27
   8  -6  -3    6.26    1.05
  -8   6   3    6.99    1.22
   7  -6  -3   19.29    1.40
   7  -6  -3   14.90    1.49
  -7   6   3   14.32    1.60
   6  -6  -3    6.09    1.04
   6  -6  -3    3.39    0.73
  -6   6   3    3.43    0.89
   5  -6  -3   25.04    1.39
   5  -6  -3   24.49    1.54
  -5   6   3   23.66    1.62
   4  -6  -3   31.71    1.41
   4  -6  -3   31.48    1.64
  -4   6   3   31.99    1.11
  -4   6   3   30.39    1.71
   3  -6  -3   25.56    1.42
   3  -6  -3   26.25    1.21
  -3   6   3   26.39    0.98
  -3   6   3   24.37    1.47
   2  -6  -3   35.96    1.32
   2  -6  -3   35.00    1.58
  -2   6   3   33.38    1.61
  -2   6   3   35.91    1.16
   1  -6  -3   -0.06    0.36
   1  -6  -3    0.32    0.31
  -1   6   3    0.10    0.41
  -1   6   3   -0.09    0.24
   0  -6  -3    3.53    0.47
   0  -6  -3    3.00    0.58
   0   6   3    2.83    0.44
   0   6   3    3.70    0.65
  -1  -6  -3    7.26    0.78
  -1  -6  -3    6.84    0.75
  -1  -6  -3    7.39    0.65
   1   6   3    6.88    0.67
  -2  -6  -3   80.13    1.93
  -2  -6  -3   75.25    2.14
  -2  -6  -3   79.08    2.09
   2   6   3   80.09    2.11
  -3  -6  -3   68.88    2.00
  -3  -6  -3   70.69    1.85
  -3  -6  -3   70.72    2.02
  -4  -6  -3   11.42    0.83
  -4  -6  -3   11.90    0.69
  -4  -6  -3   11.58    0.86
   4   6   3   11.02    0.75
   4   6   3   12.00    0.76
  -5  -6  -3    0.00    0.36
  -5  -6  -3    0.00    0.36
  -5  -6  -3    0.81    0.28
   5   6   3    0.19    0.29
  -6  -6  -3   98.98    2.63
  -6  -6  -3   98.93    2.77
   6   6   3  100.10    1.94
   6   6   3  100.79    2.66
  -7  -6  -3   12.16    0.94
  -7  -6  -3   10.37    1.08
   7   6   3   11.91    1.08
  -8  -6  -3   53.23    1.97
  -8  -6  -3   51.52    2.05
   8   6   3   49.49    1.99
  -9  -6  -3    1.80    0.62
  -9  -6  -3    2.36    0.67
   9   6   3    2.62    0.70
 -10  -6  -3   13.03    1.28
 -10  -6  -3   13.15    1.37
  10   6   3    9.87    1.22
 -11  -6  -3   28.39    1.76
 -11  -6  -3   27.69    1.70
  11   6   3   30.34    1.87
 -12  -6  -3    1.36    0.70
 -12  -6  -3    2.44    0.81
  12   6   3    2.55    0.97
 -13  -6  -3    5.93    1.12
 -13  -6  -3    6.44    1.16
  13   6   3    4.20    1.11
 -14  -6  -3    0.13    0.65
 -14  -6  -3    0.41    0.66
  14   6   3    0.50    0.86
 -15  -6  -3    6.17    1.30
 -15  -6  -3    4.46    1.10
  15   6   3    6.52    1.41
  10  -7  -3    1.72    0.93
 -10   7   3    0.09    0.86
   9  -7  -3    1.75    0.84
  -9   7   3   -0.23    0.80
   8  -7  -3    2.72    0.98
   8  -7  -3    3.68    0.87
  -8   7   3    4.08    1.12
   7  -7  -3   14.44    1.43
   7  -7  -3   16.17    1.70
  -7   7   3   15.90    1.73
   6  -7  -3    2.94    0.77
   6  -7  -3    4.07    0.88
  -6   7   3    3.23    0.94
   5  -7  -3    6.37    1.03
   5  -7  -3    6.82    0.95
  -5   7   3    4.46    0.94
   4  -7  -3   45.41    2.09
   4  -7  -3   43.78    1.80
  -4   7   3   48.12    2.24
   3  -7  -3   16.45    1.07
   3  -7  -3   18.12    1.32
  -3   7   3   15.72    0.79
  -3   7   3   17.02    1.30
   2  -7  -3   19.27    1.08
   2  -7  -3   18.35    1.26
  -2   7   3   19.91    1.38
  -2   7   3   19.22    0.86
   1  -7  -3   18.34    0.98
   1  -7  -3   16.68    1.17
  -1   7   3   17.48    1.24
  -1   7   3   17.32    0.86
   0  -7  -3   11.85    0.80
   0  -7  -3   10.92    1.04
   0   7   3   14.03    0.81
   0   7   3   12.69    1.04
  -1  -7  -3   19.95    0.97
  -1  -7  -3   19.26    1.15
  -1  -7  -3   20.01    1.13
   1   7   3   20.06    1.00
  -2  -7  -3    6.64    0.78
  -2  -7  -3    7.71    0.80
  -2  -7  -3    8.75    0.76
   2   7   3    7.89    0.79
  -3  -7  -3  127.83    3.16
  -3  -7  -3  132.60    2.96
  -3  -7  -3  137.06    3.18
  -3  -7  -3  136.24    3.05
  -4  -7  -3   16.21    0.99
  -4  -7  -3   16.51    0.90
  -4  -7  -3   16.27    1.06
   4   7   3   17.85    0.96
   4   7   3   17.22    0.93
  -5  -7  -3    2.38    0.58
  -5  -7  -3    2.16    0.42
  -5  -7  -3    1.80    0.51
   5   7   3    3.08    0.57
   5   7   3    1.16    0.41
  -6  -7  -3    8.12    0.98
  -6  -7  -3    7.02    0.84
   6   7   3    7.91    0.57
   6   7   3    7.86    0.85
  -7  -7  -3   61.30    2.28
  -7  -7  -3   66.41    2.16
   7   7   3   67.92    1.49
   7   7   3   64.69    2.22
  -8  -7  -3   55.43    2.05
  -8  -7  -3   52.52    2.16
   8   7   3   52.99    2.09
  -9  -7  -3   18.83    1.28
  -9  -7  -3   17.30    1.35
   9   7   3   18.01    1.35
 -10  -7  -3    3.80    0.86
 -10  -7  -3    3.29    0.79
  10   7   3    3.59    0.87
 -11  -7  -3    4.56    0.99
 -11  -7  -3    7.14    1.07
  11   7   3    5.05    1.06
 -12  -7  -3   24.66    1.70
 -12  -7  -3   21.02    1.69
  12   7   3   19.22    1.83
 -13  -7  -3   10.08    1.48
 -13  -7  -3   10.10    1.37
  13   7   3    8.29    1.43
 -14  -7  -3    2.60    0.88
 -14  -7  -3    0.89    0.81
  14   7   3    1.74    0.94
 -15  -7  -3    0.28    0.75
 -15  -7  -3    0.33    0.79
  15   7   3    0.37    0.98
   9  -8  -3    1.41    0.88
  -9   8   3    0.45    0.86
   8  -8  -3    9.27    1.39
  -8   8   3    5.53    1.32
   7  -8  -3    2.06    0.89
   7  -8  -3    3.47    0.92
  -7   8   3    3.20    0.99
   6  -8  -3   13.72    1.40
   6  -8  -3   11.19    1.45
  -6   8   3   10.66    1.50
   5  -8  -3   15.72    1.61
   5  -8  -3   15.29    1.25
  -5   8   3   12.34    1.46
   4  -8  -3   65.47    2.69
   4  -8  -3   68.71    2.37
  -4   8   3   67.49    2.78
   3  -8  -3   37.82    1.67
   3  -8  -3   36.47    1.90
  -3   8   3   33.15    1.94
   2  -8  -3    0.73    0.53
   2  -8  -3    0.83    0.46
  -2   8   3    1.71    0.69
   1  -8  -3   29.56    1.61
   1  -8  -3   30.90    1.35
  -1   8   3   32.37    1.20
  -1   8   3   31.00    1.69
   0  -8  -3   43.27    1.57
   0  -8  -3   47.54    1.94
   0   8   3   45.16    1.95
   0   8   3   46.22    1.52
  -1  -8  -3   90.30    2.39
  -1  -8  -3   85.25    2.62
   1   8   3   86.70    2.69
   1   8   3   94.79    2.41
  -2  -8  -3   18.61    1.14
  -2  -8  -3   16.72    1.13
  -2  -8  -3   19.81    1.05
   2   8   3   17.51    1.05
  -3  -8  -3   15.86    1.03
  -3  -8  -3   15.55    1.07
  -3  -8  -3   14.16    0.95
  -3  -8  -3   16.15    1.04
  -4  -8  -3   15.03    1.06
  -4  -8  -3   15.02    1.04
  -4  -8  -3   16.22    0.97
  -5  -8  -3   49.34    1.80
  -5  -8  -3   47.57    1.89
  -5  -8  -3   51.01    1.63
   5   8   3   49.94    1.80
   5   8   3   49.65    1.73
  -6  -8  -3   20.31    1.32
  -6  -8  -3   21.99    1.24
   6   8   3   22.32    1.26
  -7  -8  -3    1.43    0.60
  -7  -8  -3    1.26    0.50
   7   8   3    0.95    0.48
   7   8   3    1.06    0.33
  -8  -8  -3    6.66    0.90
  -8  -8  -3    6.91    1.08
   8   8   3    5.25    0.86
  -9  -8  -3   22.55    1.43
  -9  -8  -3   20.46    1.47
   9   8   3   20.42    1.45
 -10  -8  -3   84.88    3.12
 -10  -8  -3   94.59    2.97
  10   8   3   83.04    3.03
 -11  -8  -3   17.22    1.40
 -11  -8  -3   16.67    1.73
  11   8   3   16.22    1.65
 -12  -8  -3   -0.33    0.63
 -12  -8  -3   -0.01    0.61
  12   8   3    0.40    0.72
 -13  -8  -3    0.87    0.72
 -13  -8  -3    0.54    0.60
  13   8   3   -1.20    0.65
 -14  -8  -3   19.89    1.85
 -14  -8  -3   16.96    1.85
  14   8   3   17.37    1.97
 -15  -8  -3   10.84    1.69
 -15  -8  -3    8.85    1.37
  15   8   3    8.61    1.65
   8  -9  -3    9.88    1.52
  -8   9   3    9.62    1.62
   7  -9  -3    3.08    0.97
  -7   9   3    2.00    0.96
   6  -9  -3    0.29    0.74
  -6   9   3    1.58    0.90
   5  -9  -3    6.53    1.02
   5  -9  -3    6.35    1.18
  -5   9   3    4.51    1.18
   4  -9  -3   23.50    1.53
   4  -9  -3   20.95    1.70
  -4   9   3   22.36    1.76
   3  -9  -3   24.66    1.75
   3  -9  -3   31.72    1.63
  -3   9   3   28.35    1.87
   2  -9  -3    7.11    1.07
   2  -9  -3    5.79    0.84
  -2   9   3    6.05    1.06
   1  -9  -3    9.04    0.98
   1  -9  -3    7.92    1.11
  -1   9   3    7.41    1.07
   0  -9  -3    5.56    0.93
   0  -9  -3    4.18    0.69
   0   9   3    3.57    0.58
   0   9   3    5.29    0.94
  -1  -9  -3   11.81    1.18
  -1  -9  -3   12.49    0.98
   1   9   3   16.36    1.27
   1   9   3   13.78    0.94
  -2  -9  -3   40.79    1.62
  -2  -9  -3   40.62    1.77
   2   9   3   39.09    1.61
  -3  -9  -3   26.76    1.37
  -3  -9  -3   23.67    1.38
  -3  -9  -3   26.21    1.33
  -4  -9  -3    2.05    0.60
  -4  -9  -3    3.73    0.65
  -4  -9  -3    3.68    0.68
  -4  -9  -3    3.31    0.68
  -5  -9  -3    2.64    0.68
  -5  -9  -3    3.56    0.69
  -5  -9  -3    3.25    0.62
   5   9   3    2.99    0.63
   5   9   3    2.77    0.58
  -6  -9  -3   18.24    1.30
  -6  -9  -3   16.62    1.14
   6   9   3   17.81    1.17
   6   9   3   19.57    1.24
  -7  -9  -3   21.58    1.46
  -7  -9  -3   20.63    1.31
   7   9   3   20.91    1.04
   7   9   3   20.41    1.34
  -8  -9  -3   24.48    1.44
  -8  -9  -3   27.70    1.70
   8   9   3   24.87    1.53
  -9  -9  -3   -0.24    0.53
  -9  -9  -3    0.82    0.53
   9   9   3    0.82    0.59
 -10  -9  -3    0.11    0.52
 -10  -9  -3    0.51    0.63
  10   9   3   -0.01    0.56
 -11  -9  -3   10.69    1.46
 -11  -9  -3   12.16    1.32
  11   9   3    8.28    1.27
 -12  -9  -3   11.66    1.36
 -12  -9  -3   10.40    1.41
  12   9   3    9.26    1.43
 -13  -9  -3    6.10    1.13
 -13  -9  -3    6.46    1.26
  13   9   3    4.31    1.14
 -14  -9  -3    0.92    0.68
 -14  -9  -3   -0.19    0.75
  14   9   3   -0.33    0.83
 -15  -9  -3   -0.65    0.74
  15   9   3    1.53    1.16
   7 -10  -3   25.78    2.40
  -7  10   3   24.63    2.53
   6 -10  -3    5.60    1.21
  -6  10   3    4.21    1.14
   5 -10  -3   -0.53    0.68
  -5  10   3    0.16    0.84
   4 -10  -3    0.86    0.77
  -4  10   3    1.54    0.90
   3 -10  -3   19.23    1.41
   3 -10  -3   14.94    1.58
  -3  10   3   15.67    1.67
   2 -10  -3   49.96    2.09
   2 -10  -3   44.67    2.29
  -2  10   3   51.19    2.52
   1 -10  -3   21.26    1.37
   1 -10  -3   20.28    1.56
  -1  10   3   20.88    1.65
   0 -10  -3    5.19    0.93
   0 -10  -3    6.61    0.93
   0  10   3    5.20    0.99
  -1 -10  -3    1.35    0.66
  -1 -10  -3    4.38    0.76
   1  10   3    2.24    0.54
   1  10   3    2.90    0.80
  -2 -10  -3   38.96    1.88
  -2 -10  -3   41.91    1.76
   2  10   3   42.29    1.73
   2  10   3   44.40    2.06
  -3 -10  -3   57.61    2.10
  -3 -10  -3   58.18    2.26
  -3 -10  -3   57.60    2.19
   3  10   3   52.82    2.02
  -4 -10  -3   24.30    1.40
  -4 -10  -3   24.85    1.46
  -4 -10  -3   23.41    1.41
  -4 -10  -3   26.31    1.46
  -5 -10  -3   15.44    1.38
  -5 -10  -3   14.47    1.10
  -5 -10  -3   12.92    1.20
   5  10   3   14.74    1.15
   5  10   3   13.88    1.09
  -6 -10  -3   20.60    1.34
  -6 -10  -3   19.41    1.45
   6  10   3   19.19    1.30
   6  10   3   19.36    1.36
  -7 -10  -3   49.92    2.02
  -7 -10  -3   49.98    2.24
   7  10   3   46.58    2.06
   7  10   3   48.59    2.05
   7  10   3   49.46    1.76
  -8 -10  -3   12.04    1.42
  -8 -10  -3   14.59    1.33
   8  10   3   10.90    1.28
  -9 -10  -3   30.00    1.69
  -9 -10  -3   27.68    1.87
   9  10   3   30.87    1.86
 -10 -10  -3    4.58    1.02
 -10 -10  -3    6.01    0.96
  10  10   3    7.39    1.22
 -11 -10  -3    6.93    1.07
 -11 -10  -3    6.75    1.30
  11  10   3    6.88    1.19
 -12 -10  -3   13.32    1.67
 -12 -10  -3   10.44    1.33
  12  10   3    9.86    1.49
 -13 -10  -3   22.31    2.23
  13  10   3   22.13    2.15
 -14 -10  -3   16.65    1.93
  14  10   3   15.02    1.92
   6 -11  -3    4.46    1.22
  -6  11   3    1.94    1.08
   5 -11  -3    7.56    1.36
   4 -11  -3   13.93    1.69
  -4  11   3   16.10    1.95
   3 -11  -3    2.84    0.95
  -3  11   3    4.92    1.20
   2 -11  -3    0.26    0.72
  -2  11   3    0.98    0.78
   1 -11  -3    3.58    0.76
   1 -11  -3    5.61    1.07
  -1  11   3    4.28    1.07
   0 -11  -3    8.07    1.20
   0 -11  -3    8.10    1.08
   0  11   3    7.37    1.18
  -1 -11  -3    9.17    1.08
  -1 -11  -3   10.28    1.31
   1  11   3    8.50    1.21
  -2 -11  -3    2.31    0.72
  -2 -11  -3    3.27    0.77
   2  11   3    2.21    0.61
   2  11   3    3.15    0.83
  -3 -11  -3    3.97    0.84
  -3 -11  -3    4.70    0.84
   3  11   3    3.24    0.81
   3  11   3    2.53    0.71
  -4 -11  -3    8.99    1.09
  -4 -11  -3   10.68    1.18
  -4 -11  -3    6.78    1.02
  -5 -11  -3   11.95    1.22
  -5 -11  -3   12.63    1.33
  -5 -11  -3   13.97    1.37
  -6 -11  -3   65.12    2.41
  -6 -11  -3   60.00    2.51
   6  11   3   60.80    2.35
   6  11   3   60.10    2.40
  -7 -11  -3   15.40    1.55
  -7 -11  -3   13.61    1.32
   7  11   3   11.67    1.29
   7  11   3   12.50    1.21
   7  11   3   11.71    1.24
  -8 -11  -3    0.64    0.57
  -8 -11  -3    1.57    0.77
   8  11   3    2.25    0.77
  -9 -11  -3    7.88    1.06
  -9 -11  -3    9.73    1.37
   9  11   3   11.08    1.43
 -10 -11  -3   21.65    2.00
 -10 -11  -3   20.39    1.52
  10  11   3   24.80    1.85
 -11 -11  -3   14.11    1.73
 -11 -11  -3   13.73    1.43
  11  11   3   11.41    1.59
 -12 -11  -3    9.93    1.56
  12  11   3   11.63    1.63
 -13 -11  -3    3.19    1.13
  13  11   3    1.10    0.94
 -14 -11  -3    3.82    1.22
  14  11   3    3.17    1.18
   4 -12  -3    1.54    0.97
  -4  12   3   -0.14    0.86
   3 -12  -3   13.00    1.69
  -3  12   3   11.57    1.64
   2 -12  -3   10.21    1.54
  -2  12   3   15.76    1.86
   1 -12  -3   -0.03    0.70
  -1  12   3   -0.31    0.73
   0 -12  -3    0.68    0.71
   0 -12  -3    0.25    0.68
   0  12   3    0.58    0.80
  -1 -12  -3    2.17    0.78
  -1 -12  -3    0.80    0.71
   1  12   3    1.79    0.83
  -2 -12  -3    6.26    1.11
  -2 -12  -3    6.39    1.00
   2  12   3    7.59    1.18
  -3 -12  -3    2.69    0.81
  -3 -12  -3    0.90    0.64
   3  12   3    2.06    0.76
   3  12   3    1.84    0.63
  -4 -12  -3    2.63    0.74
  -4 -12  -3    0.62    0.65
   4  12   3    1.68    0.71
   4  12   3    0.89    0.60
  -5 -12  -3    5.89    1.03
  -5 -12  -3    6.75    1.09
  -5 -12  -3    7.15    1.07
  -6 -12  -3    1.78    0.79
  -6 -12  -3    1.85    0.70
   6  12   3    1.06    0.58
   6  12   3    1.99    0.67
   6  12   3    1.57    0.68
  -7 -12  -3   18.50    1.77
  -7 -12  -3   17.65    1.44
   7  12   3   20.83    1.54
   7  12   3   19.13    1.51
  -8 -12  -3    0.40    0.58
  -8 -12  -3    0.98    0.74
   8  12   3    0.99    0.67
  -9 -12  -3    4.69    1.09
  -9 -12  -3    3.41    0.82
   9  12   3    5.13    1.06
 -10 -12  -3    7.16    1.36
  10  12   3    5.03    1.11
 -11 -12  -3   14.03    1.82
  11  12   3   14.01    1.76
 -12 -12  -3   16.32    1.97
  12  12   3   17.69    1.96
 -13 -12  -3    7.38    1.55
  13  12   3    8.03    1.59
   3 -13  -3    6.62    1.44
  -3  13   3    4.17    1.25
   2 -13  -3   29.26    2.28
  -2  13   3   30.02    2.36
   1 -13  -3   30.09    2.23
  -1  13   3   30.89    2.39
   0 -13  -3    8.75    1.44
   0  13   3    7.36    1.38
  -1 -13  -3    0.01    0.70
   1  13   3    0.14    0.75
  -2 -13  -3    5.34    1.13
  -2 -13  -3    5.70    1.10
   2  13   3    6.61    1.26
  -3 -13  -3   11.04    1.48
  -3 -13  -3   11.03    1.35
   3  13   3   10.88    1.42
  -4 -13  -3   24.69    1.77
  -4 -13  -3   26.35    1.75
   4  13   3   22.20    1.75
   4  13   3   27.65    1.73
  -5 -13  -3    8.83    1.25
  -6 -13  -3   -0.04    0.62
  -6 -13  -3    0.29    0.66
   6  13   3    0.39    0.59
   6  13   3   -0.50    0.53
   6  13   3   -0.47    0.53
  -7 -13  -3    7.86    1.25
  -7 -13  -3    9.79    1.29
   7  13   3    6.55    1.08
   7  13   3    7.78    1.19
  -8 -13  -3   31.28    2.10
   8  13   3   33.12    2.10
   8  13   3   32.63    2.04
  -9 -13  -3   16.95    1.89
   9  13   3   15.89    1.78
 -10 -13  -3    2.59    1.03
  10  13   3    2.61    0.98
 -11 -13  -3    0.59    0.84
  11  13   3    0.75    0.85
 -12 -13  -3   15.07    1.97
  12  13   3   13.00    1.83
   1 -14  -3    4.86    1.25
  -1  14   3    4.24    1.26
   0 -14  -3   -0.31    0.86
   0  14   3    0.76    0.92
  -1 -14  -3    3.78    1.11
   1  14   3    2.01    1.04
  -2 -14  -3    1.15    0.80
   2  14   3   -0.14    0.82
  -3 -14  -3   -1.09    0.62
   3  14   3   -0.03    0.74
  -4 -14  -3    8.85    1.37
   4  14   3    7.34    1.24
  -5 -14  -3    7.89    1.23
   5  14   3    5.43    1.14
   5  14   3    8.86    1.32
   6  14   3   19.24    2.06
   6  14   3   23.30    1.76
   6  14   3   18.28    1.71
  -7 -14  -3    1.66    0.84
   7  14   3   -0.67    0.57
   7  14   3   -0.68    0.50
  -8 -14  -3   -0.06    0.64
   8  14   3   -0.80    0.64
   8  14   3    0.85    0.70
  -9 -14  -3    7.15    1.34
   9  14   3    8.03    1.37
 -10 -14  -3    3.20    1.08
  10  14   3    4.69    1.28
 -11 -14  -3   17.59    2.13
  11  14   3   17.36    2.06
  -3 -15  -3    3.35    1.14
   3  15   3    2.58    1.04
   5  15   3    9.81    1.44
   7  15   3    8.03    1.23
   7  15   3    9.95    1.50
  -8 -15  -3    4.36    1.16
   8  15   3    3.86    1.09
   8  15   3    5.01    1.18
   8  12  -4    4.88    1.32
   8  12  -4    3.60    1.20
  -8 -12   4    3.90    1.18
   7  12  -4    3.28    1.19
   7  12  -4    1.93    0.99
  -7 -12   4    1.54    0.93
   6  12  -4    5.68    1.21
  -6 -12   4    3.09    1.11
  -6 -12   4    5.06    1.14
   5  12  -4    4.07    1.03
  -5 -12   4    1.54    0.97
   4  12  -4    7.48    1.34
  -4 -12   4    7.52    1.48
   3  12  -4    8.79    1.53
  -3 -12   4    6.91    1.38
   2  12  -4    5.08    1.20
  -2 -12   4    7.77    1.49
   1  12  -4    0.45    0.83
  -1 -12   4    0.84    0.85
   0  12  -4   -0.85    0.75
   0 -12   4    0.37    0.85
  -1  12  -4    9.08    1.73
   1 -12   4    6.66    1.44
  10  11  -4    7.65    1.48
 -10 -11   4    6.92    1.45
   9  11  -4   -0.57    0.80
   9  11  -4   -0.63    0.80
  -9 -11   4    0.51    0.81
   8  11  -4    2.63    1.15
   8  11  -4    5.76    1.35
  -8 -11   4    4.92    1.23
   7  11  -4   20.28    2.07
   7  11  -4   22.91    2.28
   7  11  -4   23.38    1.75
  -7 -11   4   25.18    2.00
   6  11  -4    2.75    0.87
  -6 -11   4    4.36    1.07
  -6 -11   4    1.85    0.92
   5  11  -4   11.02    1.46
  -5 -11   4   11.94    1.50
  -5 -11   4    9.75    1.45
   4  11  -4   -0.10    0.72
  -4 -11   4   -0.06    0.61
  -4 -11   4   -0.45    0.69
   3  11  -4    2.36    0.91
  -3 -11   4    4.23    1.12
   2  11  -4   19.37    1.95
  -2 -11   4   18.33    1.99
   1  11  -4   10.20    1.58
  -1 -11   4    9.90    1.52
   0  11  -4   19.17    2.05
   0 -11   4   16.98    1.95
  -1  11  -4    1.55    0.90
   1 -11   4    1.78    0.99
  -2  11  -4    3.29    1.10
   2 -11   4    3.64    1.15
  -3  11  -4    8.25    1.57
   3 -11   4    9.18    1.54
  11  10  -4   -0.08    0.82
 -11 -10   4    1.05    1.00
  10  10  -4   20.72    2.28
 -10 -10   4   14.56    1.97
   9  10  -4   12.09    1.72
   9  10  -4   12.49    1.77
  -9 -10   4   11.78    1.67
   8  10  -4    1.29    0.91
   8  10  -4    1.44    0.95
  -8 -10   4    2.98    1.02
   7  10  -4    1.06    0.81
   7  10  -4   -0.16    0.69
   7  10  -4    0.48    0.58
  -7 -10   4    1.40    0.85
   6  10  -4    0.82    0.69
  -6 -10   4    0.84    0.76
  -6 -10   4    1.30    0.78
   5  10  -4    2.03    0.83
  -5 -10   4    3.21    0.90
  -5 -10   4    2.84    0.93
   4  10  -4    5.03    1.03
  -4 -10   4    7.43    1.16
  -4 -10   4    5.60    1.17
   3  10  -4    1.27    0.78
  -3 -10   4    1.51    0.84
  -3 -10   4    1.03    0.63
   2  10  -4   -0.07    0.60
  -2 -10   4   -0.50    0.60
   1  10  -4    0.58    0.77
  -1 -10   4   -0.09    0.65
   0  10  -4    9.59    1.51
   0 -10   4    8.19    1.38
  -1  10  -4    5.54    1.16
   1 -10   4    8.23    1.41
  -2  10  -4   15.11    1.84
   2 -10   4   16.99    1.89
  -3  10  -4   -0.99    0.64
   3 -10   4   -0.77    0.72
  -4  10  -4    0.34    0.74
   4 -10   4    1.51    0.96
  -5  10  -4    4.66    1.27
  -5  10  -4    7.01    1.36
   5 -10   4    6.91    1.39
 -12  -9   4   12.49    1.85
  11   9  -4   -0.92    0.73
 -11  -9   4   -0.95    0.74
  10   9  -4   15.84    1.84
 -10  -9   4   13.38    1.83
   9   9  -4   17.26    1.87
   9   9  -4   14.79    1.82
  -9  -9   4   17.13    1.89
   8   9  -4   28.87    2.10
   8   9  -4   31.27    2.14
  -8  -9   4   29.67    2.10
   7   9  -4    5.86    0.96
   7   9  -4    5.48    1.09
   7   9  -4    6.20    1.17
  -7  -9   4    7.84    1.28
   6   9  -4    1.70    0.67
  -6  -9   4    1.33    0.74
  -6  -9   4    2.13    0.82
   5   9  -4    1.20    0.68
  -5  -9   4    1.55    0.74
  -5  -9   4    2.71    0.81
   4   9  -4   15.33    1.52
  -4  -9   4   14.79    1.56
  -4  -9   4   12.31    1.31
   3   9  -4   70.01    2.82
  -3  -9   4   79.83    2.74
  -3  -9   4   78.99    3.03
   2   9  -4    0.27    0.58
  -2  -9   4    0.78    0.53
  -2  -9   4    0.02    0.58
   1   9  -4    7.90    1.22
  -1  -9   4    8.16    1.29
   0   9  -4    3.45    0.94
   0  -9   4    4.12    0.97
  -1   9  -4    4.40    1.04
   1  -9   4    5.39    1.04
  -2   9  -4    9.86    1.39
  -2   9  -4    9.85    1.20
   2  -9   4   10.04    1.38
  -3   9  -4    6.65    1.08
  -3   9  -4    6.12    1.23
   3  -9   4    6.78    1.25
  -4   9  -4   12.05    1.59
  -4   9  -4   11.51    1.44
   4  -9   4   13.46    1.69
  -5   9  -4   10.27    1.54
  -5   9  -4    6.70    1.25
   5  -9   4    8.75    1.51
  -6   9  -4    8.13    1.52
  -6   9  -4    6.15    1.28
   6  -9   4    6.70    1.40
  -7   9  -4   14.28    1.86
  -7   9  -4   13.37    1.81
   7  -9   4   10.60    1.65
  12   8  -4    6.43    1.41
 -12  -8   4    5.83    1.44
  11   8  -4   12.34    1.77
 -11  -8   4   11.77    1.71
  10   8  -4   11.38    1.65
 -10  -8   4    8.97    1.49
   9   8  -4    0.58    0.78
  -9  -8   4    0.79    0.75
   8   8  -4   10.84    1.51
   8   8  -4   10.03    1.15
   8   8  -4   11.98    1.52
  -8  -8   4   10.54    1.49
   7   8  -4    9.42    1.10
   7   8  -4    9.14    1.29
   7   8  -4   11.29    1.41
  -7  -8   4   11.69    1.45
   6   8  -4   16.52    1.29
  -6  -8   4   15.77    1.57
   5   8  -4   23.22    1.53
  -5  -8   4   23.17    1.60
  -5  -8   4   24.77    1.70
   4   8  -4    4.03    0.84
  -4  -8   4    1.44    0.65
  -4  -8   4    3.50    0.79
   3   8  -4    7.40    1.05
  -3  -8   4    8.68    1.05
  -3  -8   4    8.64    1.23
   2   8  -4   25.74    1.64
  -2  -8   4   28.50    1.76
  -2  -8   4   28.80    1.53
   1   8  -4   24.40    1.66
  -1  -8   4   24.42    1.68
  -1  -8   4   25.95    1.38
   0   8  -4   14.12    1.01
   0   8  -4   12.70    1.46
   0  -8   4   16.68    1.57
  -1   8  -4    5.46    1.04
  -1   8  -4    5.30    0.81
   1  -8   4    7.13    1.18
  -2   8  -4    5.04    1.05
  -2   8  -4    6.52    0.93
   2  -8   4    5.26    1.09
  -3   8  -4   13.59    1.54
  -3   8  -4   13.13    1.39
   3  -8   4   13.80    1.58
  -4   8  -4   43.79    2.19
  -4   8  -4   39.74    2.28
   4  -8   4   40.76    2.33
  -5   8  -4    2.53    0.88
  -5   8  -4    2.75    0.92
   5  -8   4    2.67    0.86
  -6   8  -4    3.95    1.02
  -6   8  -4    3.72    1.13
   6  -8   4    6.24    1.23
  -7   8  -4    0.85    0.89
  -7   8  -4    0.77    0.82
   7  -8   4    0.23    0.81
  -8   8  -4    6.35    1.39
  -8   8  -4    5.27    1.27
   8  -8   4    3.35    1.06
  13   7  -4    5.61    1.31
 -13  -7   4    4.89    1.27
  12   7  -4    1.41    0.94
 -12  -7   4    1.36    0.92
  11   7  -4   16.33    1.92
 -11  -7   4   17.05    1.98
  10   7  -4   18.11    1.98
 -10  -7   4   13.80    1.70
   9   7  -4    1.94    0.81
  -9  -7   4    3.76    1.00
   8   7  -4    0.94    0.70
   8   7  -4    0.28    0.67
   8   7  -4    0.03    0.46
  -8  -7   4    1.02    0.71
   7   7  -4    3.14    0.88
   7   7  -4    3.07    0.67
   7   7  -4    1.80    0.73
  -7  -7   4    3.25    0.88
   6   7  -4   14.65    1.29
   6   7  -4   13.12    1.46
   6   7  -4   14.72    1.43
  -6  -7   4   14.50    1.51
   5   7  -4    2.89    0.69
  -5  -7   4    4.30    0.90
  -5  -7   4    2.51    0.75
   4   7  -4   55.49    2.18
  -4  -7   4   52.27    2.26
  -4  -7   4   53.49    2.17
   3   7  -4    0.47    0.46
  -3  -7   4   -0.09    0.44
  -3  -7   4    0.23    0.48
   2   7  -4    0.07    0.46
  -2  -7   4    0.00    0.48
  -2  -7   4    0.81    0.45
   1   7  -4   41.04    1.39
   1   7  -4   41.71    1.96
  -1  -7   4   38.74    1.94
  -1  -7   4   42.19    1.68
   0   7  -4    3.26    0.56
   0   7  -4    2.53    0.71
   0  -7   4    2.80    0.57
   0  -7   4    2.02    0.65
  -1   7  -4   23.30    1.56
  -1   7  -4   21.94    1.21
   1  -7   4   20.05    1.42
  -2   7  -4    0.37    0.47
  -2   7  -4    0.61    0.57
   2  -7   4    0.84    0.59
  -3   7  -4    1.09    0.60
  -3   7  -4    0.30    0.61
   3  -7   4    0.52    0.60
  -4   7  -4    4.23    0.93
  -4   7  -4    5.60    1.07
   4  -7   4    5.78    1.04
  -5   7  -4    3.56    0.93
  -5   7  -4    4.56    0.96
   5  -7   4    4.98    1.08
  -6   7  -4   -0.14    0.66
  -6   7  -4    1.89    0.81
   6  -7   4    1.20    0.79
  -7   7  -4    0.50    0.68
  -7   7  -4    0.93    0.85
   7  -7   4    0.51    0.76
  -8   7  -4    0.16    0.71
  -8   7  -4    0.21    0.90
   8  -7   4    1.02    0.85
  -9   7  -4    3.92    1.27
  -9   7  -4    4.54    1.18
   9  -7   4    3.82    1.17
  13   6  -4    4.79    1.31
 -13  -6   4    8.19    1.53
  12   6  -4   11.27    1.62
 -12  -6   4    7.99    1.41
  11   6  -4    2.18    0.95
 -11  -6   4    0.94    0.84
  10   6  -4    0.61    0.75
 -10  -6   4    1.78    0.84
   9   6  -4   64.20    2.79
  -9  -6   4   64.11    2.84
   8   6  -4   39.06    2.11
   8   6  -4   38.25    1.72
  -8  -6   4   38.83    2.13
   7   6  -4   80.89    2.90
   7   6  -4   87.27    3.05
   7   6  -4   84.25    2.60
  -7  -6   4   81.52    2.98
   6   6  -4    6.83    1.02
   6   6  -4    7.00    0.90
   6   6  -4    7.70    1.04
  -6  -6   4    7.89    1.07
   5   6  -4    0.75    0.47
  -5  -6   4    1.90    0.67
  -5  -6   4    0.66    0.52
   4   6  -4   56.03    2.08
  -4  -6   4   57.71    2.16
  -4  -6   4   55.78    2.22
   3   6  -4    4.77    0.78
  -3  -6   4    4.48    0.82
  -3  -6   4    5.06    0.78
   2   6  -4   23.72    0.84
   2   6  -4   25.76    1.43
  -2  -6   4   22.88    1.40
  -2  -6   4   22.39    1.23
   1   6  -4    0.24    0.46
   1   6  -4   -0.05    0.25
  -1  -6   4    0.14    0.47
  -1  -6   4   -0.24    0.29
   0   6  -4   15.39    1.20
   0   6  -4   17.39    0.91
   0  -6   4   17.71    0.98
   0  -6   4   14.88    1.18
  -1   6  -4   19.56    1.36
  -1   6  -4   19.43    1.07
   1  -6   4   20.87    0.98
   1  -6   4   22.48    1.43
  -2   6  -4   46.44    1.78
  -2   6  -4   47.83    2.09
   2  -6   4   47.30    2.08
  -3   6  -4   59.58    2.42
  -3   6  -4   60.28    2.21
   3  -6   4   68.15    2.57
  -4   6  -4    2.54    0.72
  -4   6  -4    2.54    0.73
   4  -6   4    3.05    0.87
  -5   6  -4    0.07    0.59
  -5   6  -4    0.62    0.62
   5  -6   4   -0.78    0.54
  -6   6  -4    8.56    1.29
  -6   6  -4    6.27    1.08
   6  -6   4    5.36    1.01
  -7   6  -4   17.39    1.82
  -7   6  -4   18.10    1.75
   7  -6   4   20.94    1.98
  -8   6  -4   10.58    1.52
  -8   6  -4   11.98    1.48
   8  -6   4   11.39    1.58
  -9   6  -4    1.58    0.79
  -9   6  -4   -0.04    0.78
   9  -6   4    0.34    0.79
 -10   6  -4   -0.03    0.89
 -10   6  -4    0.42    0.75
  10  -6   4   -0.55    0.70
  13   5  -4   -0.84    0.68
 -13  -5   4    0.61    0.83
  12   5  -4   15.62    1.85
 -12  -5   4   10.68    1.63
  11   5  -4   15.38    1.77
 -11  -5   4   15.17    1.78
  10   5  -4   10.92    1.44
 -10  -5   4    8.57    1.31
   9   5  -4    1.70    0.72
   9   5  -4    1.51    0.55
  -9  -5   4    0.83    0.72
   8   5  -4    5.29    0.78
   8   5  -4    3.27    0.85
  -8  -5   4    3.44    0.86
   7   5  -4   61.85    2.46
   7   5  -4   62.05    2.41
   7   5  -4   62.59    2.11
  -7  -5   4   57.49    2.42
   6   5  -4   28.54    1.63
   6   5  -4   30.08    1.58
   6   5  -4   26.88    1.38
  -6  -5   4   26.35    1.58
   5   5  -4    8.93    0.93
  -5  -5   4    7.79    1.01
   4   5  -4    4.16    0.71
  -4  -5   4    4.43    0.80
  -4  -5   4    5.29    0.83
   3   5  -4    4.52    0.72
  -3  -5   4    4.43    0.71
  -3  -5   4    4.48    0.77
   2   5  -4   39.38    1.64
   2   5  -4   40.45    0.96
  -2  -5   4   39.04    1.69
  -2  -5   4   39.75    1.58
   1   5  -4    4.81    0.73
   1   5  -4    6.73    0.50
  -1  -5   4    6.37    0.73
  -1  -5   4    6.64    0.89
   0   5  -4   51.77    1.47
   0   5  -4   49.24    1.92
   0  -5   4   49.97    1.92
   0  -5   4   51.06    1.63
  -1   5  -4    1.81    0.43
  -1   5  -4    1.90    0.58
   1  -5   4    1.84    0.53
   1  -5   4    1.36    0.37
  -2   5  -4    0.55    0.45
  -2   5  -4   -0.24    0.32
   2  -5   4    0.05    0.23
   2  -5   4   -0.53    0.36
  -3   5  -4   22.16    1.27
  -3   5  -4   26.23    1.50
   3  -5   4   25.01    1.51
  -4   5  -4    0.11    0.46
  -4   5  -4    0.41    0.52
   4  -5   4    0.69    0.56
  -5   5  -4   14.27    1.37
  -5   5  -4   17.40    1.52
   5  -5   4   13.25    1.35
  -6   5  -4    0.29    0.64
   6  -5   4   -0.13    0.52
  -7   5  -4    0.65    0.73
   7  -5   4    0.08    0.62
  -8   5  -4    9.54    1.42
   8  -5   4    6.26    1.21
  -9   5  -4    7.36    1.35
   9  -5   4    8.00    1.32
 -10   5  -4    9.73    1.52
 -10   5  -4    6.95    1.24
  10  -5   4    7.35    1.38
 -11   5  -4   -0.18    0.77
  11  -5   4    2.79    1.06
  13   4  -4    9.35    1.59
 -13  -4   4    8.41    1.43
  12   4  -4    2.41    0.99
 -12  -4   4    2.86    1.03
  11   4  -4    3.59    1.12
 -11  -4   4    5.43    1.15
  10   4  -4   21.89    1.72
 -10  -4   4   27.23    1.90
   9   4  -4   27.72    1.42
   9   4  -4   26.67    1.77
  -9  -4   4   29.77    1.85
   8   4  -4    6.50    0.84
   8   4  -4    5.77    0.99
  -8  -4   4    6.48    1.06
   7   4  -4    2.14    0.68
   7   4  -4    4.10    0.67
  -7  -4   4    0.41    0.52
   6   4  -4    9.87    1.13
   6   4  -4    9.21    0.92
   6   4  -4    9.30    1.06
  -6  -4   4    9.28    0.58
  -6  -4   4    7.03    0.94
   5   4  -4  126.81    3.43
   5   4  -4  126.84    3.32
   5   4  -4  133.05    3.20
  -5  -4   4  136.47    3.56
  -5  -4   4  132.47    2.36
   4   4  -4    8.36    0.85
  -4  -4   4    6.62    0.82
  -4  -4   4    7.45    0.93
   3   4  -4   32.42    1.39
  -3  -4   4   31.37    1.46
  -3  -4   4   31.27    1.43
   2   4  -4   12.57    0.93
  -2  -4   4   11.76    0.91
  -2  -4   4   13.37    0.98
   1   4  -4   25.08    0.73
   1   4  -4   24.10    1.25
  -1  -4   4   23.91    1.26
  -1  -4   4   25.34    1.15
   0   4  -4   48.86    1.77
   0   4  -4   47.43    1.27
   0  -4   4   45.34    1.46
   0  -4   4   46.12    1.73
  -1   4  -4   27.27    1.07
  -1   4  -4   28.51    1.39
   1  -4   4   29.28    1.38
   1  -4   4   28.01    1.05
  -2   4  -4    3.89    0.69
  -2   4  -4    3.64    0.59
   2  -4   4    2.35    0.54
   2  -4   4    4.21    0.46
  -3   4  -4    4.45    0.68
  -3   4  -4    2.20    0.59
   3  -4   4    2.63    0.61
   3  -4   4    3.01    0.34
  -4   4  -4   26.48    1.39
  -4   4  -4   27.02    1.47
   4  -4   4   28.83    1.55
  -5   4  -4   11.79    1.18
  -5   4  -4   10.32    1.13
   5  -4   4   10.69    1.19
  -6   4  -4   33.39    1.80
   6  -4   4   30.97    1.78
  -7   4  -4   18.13    1.66
   7  -4   4   11.99    1.34
  -8   4  -4    3.77    0.98
   8  -4   4    3.98    0.98
  -9   4  -4    7.70    1.31
   9  -4   4   11.00    1.51
 -10   4  -4   24.23    2.00
  10  -4   4   23.27    1.90
 -11   4  -4    3.17    1.11
  11  -4   4    1.50    0.94
 -12   4  -4    2.65    1.08
  12  -4   4    4.22    1.25
  13   3  -4   15.11    1.87
 -13  -3   4   17.53    1.96
  12   3  -4    8.70    1.49
 -12  -3   4    9.57    1.47
  11   3  -4    1.80    0.88
 -11  -3   4    0.93    0.77
  10   3  -4    0.92    0.74
 -10  -3   4    1.66    0.75
   9   3  -4    3.61    0.90
   9   3  -4    3.73    0.69
  -9  -3   4    2.71    0.62
  -9  -3   4    1.52    0.72
   8   3  -4   42.24    1.67
   8   3  -4   44.59    2.05
  -8  -3   4   41.10    1.57
  -8  -3   4   37.29    1.93
   7   3  -4   33.23    1.43
   7   3  -4   30.93    1.66
  -7  -3   4   30.61    1.71
  -7  -3   4   32.06    1.25
   6   3  -4   10.94    1.07
   6   3  -4   11.91    0.89
  -6  -3   4   11.31    1.14
  -6  -3   4   12.13    0.70
   5   3  -4    0.03    0.39
   5   3  -4    0.31    0.35
   5   3  -4    0.56    0.44
  -5  -3   4   -0.49    0.32
  -5  -3   4    0.06    0.22
   4   3  -4   -0.09    0.32
   4   3  -4    0.19    0.34
   4   3  -4    0.60    0.41
  -4  -3   4    0.01    0.38
  -4  -3   4    0.05    0.15
   3   3  -4   30.83    1.29
  -3  -3   4   31.40    1.37
  -3  -3   4   31.75    1.37
   2   3  -4   94.40    2.44
  -2  -3   4   94.48    2.45
  -2  -3   4   92.36    2.44
   1   3  -4   28.22    1.25
   1   3  -4   28.59    0.63
  -1  -3   4   27.42    1.17
  -1  -3   4   27.50    1.24
   0   3  -4   28.99    1.27
   0   3  -4   28.55    0.84
   0  -3   4   26.05    1.07
  -1   3  -4   74.13    1.77
  -1   3  -4   72.92    2.15
   1  -3   4   72.05    1.80
   1  -3   4   76.48    2.18
  -2   3  -4  183.13    3.98
  -2   3  -4  183.55    3.66
   2  -3   4  185.23    3.37
   2  -3   4  176.56    3.96
  -3   3  -4    0.35    0.40
  -3   3  -4    0.14    0.36
   3  -3   4    0.65    0.43
   3  -3   4    0.38    0.22
  -4   3  -4   65.06    2.12
  -4   3  -4   61.77    2.04
   4  -3   4   61.84    2.17
   4  -3   4   60.14    1.28
  -5   3  -4    3.90    0.73
  -5   3  -4    4.23    0.77
   5  -3   4    3.98    0.76
  -6   3  -4   11.67    1.24
   6  -3   4   10.83    1.17
  -7   3  -4   10.93    1.32
   7  -3   4   10.20    1.22
  -8   3  -4    1.58    0.75
   8  -3   4    1.41    0.67
  -9   3  -4   19.94    1.87
   9  -3   4   15.98    1.71
 -10   3  -4   15.62    1.77
  10  -3   4   18.42    1.92
 -11   3  -4    7.11    1.39
  11  -3   4    6.59    1.29
 -12   3  -4    2.98    1.15
  12  -3   4    3.71    1.12
  13   2  -4    2.39    1.11
 -13  -2   4    3.77    1.06
  12   2  -4    4.09    1.14
 -12  -2   4    7.52    1.32
  11   2  -4    2.86    0.96
 -11  -2   4    2.62    0.91
 -11  -2   4    3.61    0.94
  10   2  -4    1.24    0.79
 -10  -2   4    2.16    0.80
 -10  -2   4    2.56    0.69
   9   2  -4    9.89    1.02
   9   2  -4   10.06    1.23
  -9  -2   4    9.23    1.06
  -9  -2   4    8.58    1.13
   8   2  -4   38.66    1.91
   8   2  -4   42.37    1.67
  -8  -2   4   38.77    1.61
  -8  -2   4   40.18    1.94
   7   2  -4    1.29    0.56
   7   2  -4    1.97    0.53
  -7  -2   4    1.78    0.47
  -7  -2   4    1.99    0.65
   6   2  -4   51.62    1.97
   6   2  -4   53.12    1.77
  -6  -2   4   52.54    1.58
  -6  -2   4   53.85    2.04
   5   2  -4   33.06    1.45
   5   2  -4   33.78    1.36
  -5  -2   4   33.70    1.09
  -5  -2   4   32.67    1.50
   4   2  -4    0.36    0.40
   4   2  -4    0.92    0.38
   4   2  -4    1.58    0.46
  -4  -2   4    0.80    0.26
  -4  -2   4    0.69    0.45
   3   2  -4   50.46    1.62
  -3  -2   4   47.82    1.61
  -3  -2   4   47.45    1.69
  -3  -2   4   50.15    0.99
   2   2  -4    0.09    0.31
  -2  -2   4   -0.27    0.30
  -2  -2   4   -0.48    0.31
   1   2  -4   87.39    2.23
  -1  -2   4   85.02    2.17
  -1  -2   4   89.81    2.21
   0   2  -4    1.39    0.23
   0   2  -4    1.09    0.42
   0  -2   4    2.03    0.43
   0  -2   4    1.20    0.41
  -1   2  -4    5.48    0.68
  -1   2  -4    5.03    0.47
   1  -2   4    5.88    0.68
   1  -2   4    5.33    0.54
  -2   2  -4  113.17    2.46
  -2   2  -4  109.18    2.68
   2  -2   4  115.46    2.73
   2  -2   4  114.80    2.30
  -3   2  -4   32.97    1.28
  -3   2  -4   31.45    1.32
   3  -2   4   33.04    1.40
   3  -2   4   31.45    0.94
  -4   2  -4   32.50    1.36
  -4   2  -4   34.32    1.41
   4  -2   4   31.69    1.44
   4  -2   4   31.26    0.89
  -5   2  -4    3.58    0.67
  -5   2  -4    2.09    0.52
   5  -2   4    3.23    0.33
   5  -2   4    2.21    0.59
  -6   2  -4   -0.20    0.32
  -6   2  -4   -0.45    0.36
   6  -2   4   -0.11    0.17
   6  -2   4    0.12    0.38
  -7   2  -4   12.22    1.26
   7  -2   4   10.52    1.17
  -8   2  -4    7.59    1.11
   8  -2   4    6.15    0.93
  -9   2  -4   15.81    1.66
   9  -2   4   13.89    1.51
 -10   2  -4    0.07    0.70
  10  -2   4    0.74    0.70
 -11   2  -4   -0.40    0.58
  11  -2   4   -0.83    0.56
 -12   2  -4    2.83    1.08
  12  -2   4    3.81    1.11
 -13   2  -4    1.18    0.97
  13  -2   4   -0.09    0.81
  13   1  -4    3.43    1.18
  12   1  -4    1.02    0.89
 -12  -1   4    1.63    0.81
 -12  -1   4    1.31    0.80
  11   1  -4    8.39    1.30
 -11  -1   4    5.75    1.06
 -11  -1   4    7.25    1.18
  10   1  -4    6.80    0.91
  10   1  -4    7.33    1.14
 -10  -1   4    5.07    0.93
 -10  -1   4    7.08    1.05
   9   1  -4   63.16    2.56
   9   1  -4   66.35    2.25
  -9  -1   4   64.39    2.38
  -9  -1   4   67.99    2.57
   8   1  -4   55.48    2.21
   8   1  -4   52.01    1.90
  -8  -1   4   52.66    2.01
  -8  -1   4   53.50    2.23
   7   1  -4    1.86    0.58
   7   1  -4    1.77    0.50
  -7  -1   4    2.44    0.58
  -7  -1   4    2.61    0.65
   6   1  -4   30.23    1.45
   6   1  -4   26.67    1.26
  -6  -1   4   28.86    1.23
  -6  -1   4   28.53    1.44
   5   1  -4   38.58    1.53
   5   1  -4   36.09    1.40
  -5  -1   4   36.30    1.27
  -5  -1   4   35.93    1.54
   4   1  -4  176.85    3.71
   4   1  -4  177.87    3.66
  -4  -1   4  168.58    3.81
  -4  -1   4  174.46    3.29
   3   1  -4   66.22    1.81
   3   1  -4   70.98    1.91
   3   1  -4   69.13    1.88
  -3  -1   4   66.85    1.47
  -3  -1   4   67.76    1.99
   2   1  -4    0.97    0.38
  -2  -1   4    0.71    0.39
  -2  -1   4    1.36    0.21
  -2  -1   4    1.42    0.39
   1   1  -4    7.85    0.71
  -1  -1   4    7.54    0.61
  -1  -1   4    7.63    0.72
  -1  -1   4    7.13    0.29
   0   1  -4   76.21    1.42
   0   1  -4   76.30    1.95
   0  -1   4   74.39    1.82
   0  -1   4   74.50    1.86
  -1   1  -4  132.87    2.44
  -1   1  -4  122.68    2.76
   1  -1   4  133.73    2.74
   1  -1   4  126.57    2.61
  -2   1  -4    1.07    0.37
  -2   1  -4    1.05    0.34
   2  -1   4    0.96    0.35
   2  -1   4    1.37    0.34
  -3   1  -4    1.10    0.39
  -3   1  -4    0.81    0.39
   3  -1   4    0.86    0.41
   3  -1   4    1.03    0.29
  -4   1  -4   16.74    0.91
  -4   1  -4   18.15    1.01
   4  -1   4   19.18    1.07
   4  -1   4   17.88    0.73
  -5   1  -4  154.25    3.38
  -5   1  -4  160.99    3.67
   5  -1   4  162.51    3.00
   5  -1   4  161.26    3.72
  -6   1  -4   72.13    2.34
  -6   1  -4   70.67    2.05
   6  -1   4   69.70    2.33
   6  -1   4   71.61    1.67
  -7   1  -4    2.69    0.71
   7  -1   4    3.38    0.73
   7  -1   4    2.51    0.40
  -8   1  -4    7.79    1.02
   8  -1   4   10.32    1.25
  -9   1  -4   30.12    1.83
   9  -1   4   29.69    1.81
 -10   1  -4   31.21    2.02
  10  -1   4   32.63    2.01
 -11   1  -4   10.79    1.55
  11  -1   4    7.59    1.31
 -12   1  -4    5.31    1.30
  12  -1   4    2.55    0.90
 -13   1  -4    0.41    0.78
  13  -1   4    0.99    0.86
 -14   1  -4   10.93    1.78
  14  -1   4   13.44    2.01
  13   0  -4    7.47    1.42
 -13   0   4    4.92    1.21
  12   0  -4    5.51    1.27
 -12   0   4    6.15    1.24
  11   0  -4    0.58    0.82
 -11   0   4    0.01    0.57
 -11   0   4    0.61    0.69
  10   0  -4    1.75    0.61
  10   0  -4    2.61    0.88
 -10   0   4    1.99    0.82
 -10   0   4    2.17    0.73
   9   0  -4   24.85    1.42
   9   0  -4   22.40    1.60
  -9   0   4   24.11    1.51
  -9   0   4   21.22    1.53
   8   0  -4    7.81    1.07
   8   0  -4    7.30    0.88
  -8   0   4    7.44    1.00
  -8   0   4    7.29    0.98
   7   0  -4    1.60    0.49
   7   0  -4    1.32    0.57
  -7   0   4    1.35    0.52
  -7   0   4    1.07    0.54
   6   0  -4   14.14    0.97
   6   0  -4   13.10    0.99
  -6   0   4   13.44    1.03
  -6   0   4   13.23    0.97
   5   0  -4   -0.15    0.33
   5   0  -4   -0.05    0.31
  -5   0   4    0.10    0.34
  -5   0   4   -0.05    0.35
   4   0  -4   43.06    1.50
   4   0  -4   41.66    1.45
  -4   0   4   41.64    1.35
  -4   0   4   42.57    1.56
   3   0  -4   13.22    0.82
   3   0  -4   12.64    0.75
  -3   0   4   14.01    0.89
  -3   0   4   11.60    0.66
   2   0  -4   24.59    0.94
   2   0  -4   25.74    0.93
   2   0  -4   26.19    1.06
  -2   0   4   24.47    1.06
  -2   0   4   23.84    0.79
   1   0  -4   15.18    0.53
  -1   0   4   15.06    0.84
  -1   0   4   14.09    0.69
   0   0  -4    1.33    0.25
   0   0  -4    1.07    0.38
   0   0   4    1.03    0.34
   0   0   4    1.33    0.32
  -1   0  -4    5.11    0.56
  -1   0  -4    5.39    0.44
   1   0   4    5.38    0.53
   1   0   4    5.16    0.50
  -2   0  -4    1.76    0.40
  -2   0  -4    1.45    0.35
   2   0   4    1.90    0.39
   2   0   4    1.70    0.39
  -3   0  -4  125.36    2.62
  -3   0  -4  124.07    2.70
   3   0   4  128.41    2.53
   3   0   4  126.46    2.75
  -4   0  -4    1.26    0.43
  -4   0  -4    1.77    0.39
   4   0   4    1.17    0.32
   4   0   4    1.52    0.45
  -5   0  -4    0.39    0.29
  -5   0  -4    0.12    0.34
   5   0   4    1.00    0.45
   5   0   4    0.71    0.28
  -6   0  -4    1.57    0.49
  -6   0  -4    1.53    0.39
   6   0   4    1.31    0.33
   6   0   4    1.21    0.50
  -7   0  -4    3.28    0.73
  -7   0  -4    3.08    0.52
   7   0   4    1.85    0.60
   7   0   4    2.55    0.44
  -8   0  -4   26.21    1.18
  -8   0  -4   24.70    1.52
   8   0   4   25.30    1.50
   8   0   4   26.23    1.10
  -9   0  -4    2.11    0.67
   9   0   4    1.65    0.45
   9   0   4    2.21    0.65
 -10   0  -4    0.37    0.61
  10   0   4    0.51    0.62
 -11   0  -4    9.02    1.31
  11   0   4    8.18    1.31
 -12   0  -4   32.08    2.19
  12   0   4   33.61    2.23
 -13   0  -4    8.70    1.53
  13   0   4    7.30    1.38
 -14   0  -4    2.93    1.14
  14   0   4    3.78    1.19
  13  -1  -4    0.27    0.91
 -13   1   4   -0.54    0.81
  12  -1  -4   11.79    1.66
 -12   1   4    9.52    1.46
  11  -1  -4   16.31    1.75
 -11   1   4   17.59    1.80
  10  -1  -4    5.93    1.13
  10  -1  -4    5.68    0.92
 -10   1   4    6.38    1.00
 -10   1   4    5.96    1.14
   9  -1  -4    0.94    0.67
   9  -1  -4    0.08    0.49
  -9   1   4    0.33    0.54
  -9   1   4    0.92    0.65
   8  -1  -4   11.60    1.12
   8  -1  -4   10.05    1.19
  -8   1   4   12.00    1.29
  -8   1   4   11.56    1.17
   7  -1  -4   42.92    1.75
   7  -1  -4   40.86    1.79
  -7   1   4   43.39    1.86
  -7   1   4   39.38    1.70
   6  -1  -4   13.50    0.98
   6  -1  -4   11.93    0.96
  -6   1   4   13.00    0.99
  -6   1   4   13.01    1.03
   5  -1  -4   21.51    1.11
   5  -1  -4   22.82    1.16
  -5   1   4   20.88    1.15
  -5   1   4   20.54    1.11
   4  -1  -4   13.07    0.90
   4  -1  -4   11.89    0.81
  -4   1   4   12.32    0.82
  -4   1   4   13.04    0.89
   3  -1  -4    1.32    0.37
   3  -1  -4    1.62    0.42
  -3   1   4    1.54    0.40
  -3   1   4    1.85    0.44
   2  -1  -4   88.17    2.17
   2  -1  -4   91.18    1.93
  -2   1   4   90.33    2.00
  -2   1   4   90.96    2.21
   1  -1  -4   40.56    1.03
   1  -1  -4   41.37    1.01
   1  -1  -4   40.62    1.09
   1  -1  -4   39.85    1.29
  -1   1   4   38.50    1.29
   0  -1  -4    1.07    0.34
   0  -1  -4    1.35    0.29
   0   1   4    0.83    0.37
   0   1   4    1.04    0.23
  -1  -1  -4   35.45    1.11
  -1  -1  -4   34.44    0.99
   1   1   4   35.00    1.14
   1   1   4   34.10    0.91
  -2  -1  -4  132.64    2.59
  -2  -1  -4  124.92    2.53
   2   1   4  127.24    2.62
   2   1   4  133.69    2.51
  -3  -1  -4    6.49    0.61
  -3  -1  -4    5.30    0.48
   3   1   4    6.13    0.59
   3   1   4    6.50    0.57
  -4  -1  -4   93.80    1.99
  -4  -1  -4   91.65    2.29
   4   1   4   90.43    2.08
   4   1   4   96.44    2.28
  -5  -1  -4   41.71    1.56
  -5  -1  -4   42.06    1.19
   5   1   4   42.17    1.32
   5   1   4   46.84    1.58
  -6  -1  -4    2.03    0.54
  -6  -1  -4    2.29    0.37
   6   1   4    2.07    0.42
   6   1   4    1.74    0.51
  -7  -1  -4   14.83    0.75
  -7  -1  -4   15.33    1.12
   7   1   4   13.57    1.06
  -8  -1  -4   24.80    1.46
  -8  -1  -4   25.84    1.02
   8   1   4   22.33    1.40
  -9  -1  -4   33.94    1.25
  -9  -1  -4   33.78    1.81
  -9  -1  -4   33.85    1.39
   9   1   4   32.31    1.77
 -10  -1  -4    6.25    0.78
 -10  -1  -4    5.35    0.94
  10   1   4    5.62    1.05
 -11  -1  -4   -0.64    0.60
  11   1   4   -0.24    0.57
 -12  -1  -4   10.58    1.51
  12   1   4    9.58    1.48
 -13  -1  -4   27.86    2.13
  13   1   4   26.71    2.09
 -14  -1  -4    7.14    1.45
  14   1   4    3.85    1.11
  12  -2  -4   -0.40    0.75
 -12   2   4    1.34    0.96
  11  -2  -4   -0.47    0.65
 -11   2   4   -0.96    0.77
  10  -2  -4   18.28    1.41
  10  -2  -4   18.87    1.82
 -10   2   4   17.78    1.76
   9  -2  -4   17.08    1.56
   9  -2  -4   18.02    1.38
  -9   2   4   19.58    1.32
  -9   2   4   18.46    1.68
   8  -2  -4    7.73    1.04
   8  -2  -4    9.25    1.07
  -8   2   4    8.77    1.17
  -8   2   4    9.42    1.02
   7  -2  -4    2.57    0.63
   7  -2  -4    2.74    0.68
  -7   2   4    2.20    0.70
  -7   2   4    3.39    0.66
   6  -2  -4    0.06    0.36
   6  -2  -4    0.92    0.51
  -6   2   4    0.49    0.43
  -6   2   4    1.04    0.51
   5  -2  -4   13.00    0.95
   5  -2  -4   14.10    0.96
  -5   2   4   12.57    0.90
  -5   2   4   13.80    1.05
   4  -2  -4   33.59    1.40
   4  -2  -4   33.15    1.24
  -4   2   4   32.01    1.38
  -4   2   4   34.01    1.32
   3  -2  -4   33.00    1.12
   3  -2  -4   31.96    1.29
  -3   2   4   31.46    1.22
  -3   2   4   33.03    1.27
   2  -2  -4    6.11    0.49
   2  -2  -4    5.14    0.61
  -2   2   4    6.07    0.63
  -2   2   4    6.86    0.65
   1  -2  -4   16.12    0.87
   1  -2  -4   16.21    0.57
  -1   2   4   14.60    0.81
   0  -2  -4   46.46    1.38
   0  -2  -4   48.68    1.30
   0  -2  -4   47.17    0.87
   0  -2  -4   49.03    0.91
   0  -2  -4   47.94    0.91
   0   2   4   49.09    1.42
  -1  -2  -4   41.27    1.20
  -1  -2  -4   42.34    1.20
   1   2   4   41.70    0.84
   1   2   4   41.46    1.28
  -2  -2  -4  936.67   15.05
  -2  -2  -4  962.94   14.77
   2   2   4 1000.00   14.73
   2   2   4  973.76   15.09
  -3  -2  -4   15.54    0.84
  -3  -2  -4   15.51    0.65
   3   2   4   15.34    0.81
   3   2   4   17.12    0.74
  -4  -2  -4   21.78    0.72
  -4  -2  -4   21.43    1.02
   4   2   4   21.68    0.94
   4   2   4   20.49    0.93
  -5  -2  -4  153.28    3.41
  -5  -2  -4  153.78    2.72
   5   2   4  153.42    3.29
   5   2   4  151.66    3.18
  -6  -2  -4   52.06    1.23
  -6  -2  -4   51.97    1.84
   6   2   4   54.68    1.81
  -7  -2  -4   77.51    2.45
  -7  -2  -4   85.39    1.75
  -7  -2  -4   81.48    2.21
   7   2   4   89.20    2.55
  -8  -2  -4    5.07    0.67
  -8  -2  -4    4.25    0.43
  -8  -2  -4    4.10    0.78
   8   2   4    2.55    0.62
  -9  -2  -4    5.76    0.91
  -9  -2  -4    8.13    0.86
   9   2   4    6.44    0.99
 -10  -2  -4   15.70    1.08
 -10  -2  -4   17.47    1.64
  10   2   4   11.68    1.31
 -11  -2  -4   53.14    2.00
 -11  -2  -4   50.98    2.40
  11   2   4   49.35    2.40
 -12  -2  -4   12.46    1.56
  12   2   4   11.24    1.49
 -13  -2  -4    0.50    0.71
  13   2   4    0.37    0.74
 -14  -2  -4    2.26    0.93
  14   2   4    3.68    1.15
 -15  -2  -4   16.43    2.07
  15   2   4   13.84    2.03
  12  -3  -4    5.64    1.23
 -12   3   4    3.60    1.30
  11  -3  -4    1.10    0.78
 -11   3   4    0.17    0.88
  10  -3  -4   11.54    1.47
  10  -3  -4   11.91    1.36
 -10   3   4   11.51    1.55
   9  -3  -4    4.63    1.00
   9  -3  -4    3.78    0.84
  -9   3   4    4.28    1.03
   8  -3  -4   12.80    1.32
   8  -3  -4    9.58    1.15
  -8   3   4   11.34    1.38
  -8   3   4   11.07    1.07
   7  -3  -4   18.02    1.29
   7  -3  -4   16.12    1.27
  -7   3   4   18.64    1.14
  -7   3   4   18.86    1.43
   6  -3  -4    1.99    0.60
   6  -3  -4    3.10    0.64
  -6   3   4    1.45    0.51
  -6   3   4    2.82    0.73
   5  -3  -4    0.06    0.39
   5  -3  -4    0.55    0.40
  -5   3   4    0.89    0.54
  -5   3   4    0.70    0.39
   4  -3  -4    0.97    0.39
   4  -3  -4    1.08    0.46
  -4   3   4    0.90    0.40
  -4   3   4    0.33    0.44
   3  -3  -4   43.56    1.59
   3  -3  -4   43.18    1.30
  -3   3   4   41.74    1.56
  -3   3   4   42.53    1.42
   2  -3  -4    5.46    0.66
   2  -3  -4    5.35    0.47
  -2   3   4    5.13    0.58
  -2   3   4    4.86    0.65
   1  -3  -4    0.08    0.19
   1  -3  -4   -0.14    0.27
  -1   3   4    0.19    0.32
  -1   3   4   -0.24    0.28
   0  -3  -4   30.40    1.09
   0  -3  -4   28.74    1.10
   0   3   4   29.44    1.10
  -1  -3  -4    1.02    0.37
  -1  -3  -4    0.65    0.31
   1   3   4    0.66    0.32
  -2  -3  -4    2.53    0.43
  -2  -3  -4    2.96    0.40
   2   3   4    3.01    0.47
   2   3   4    3.33    0.30
  -3  -3  -4    0.11    0.33
  -3  -3  -4    0.08    0.22
   3   3   4    0.15    0.24
   3   3   4    0.32    0.32
  -4  -3  -4   10.35    0.47
  -4  -3  -4    9.29    0.76
   4   3   4   10.15    0.76
   4   3   4    9.42    0.66
  -5  -3  -4    2.07    0.51
  -5  -3  -4    2.71    0.26
   5   3   4    3.13    0.53
  -6  -3  -4  114.61    2.91
  -6  -3  -4  115.64    2.76
  -6  -3  -4  113.92    1.91
   6   3   4  117.51    2.86
  -7  -3  -4   29.94    1.43
  -7  -3  -4   29.52    1.30
   7   3   4   28.83    1.39
  -8  -3  -4   29.88    1.56
  -8  -3  -4   30.89    1.40
   8   3   4   31.20    1.55
  -9  -3  -4    3.13    0.63
  -9  -3  -4    4.36    0.81
   9   3   4    3.87    0.81
 -10  -3  -4    0.32    0.55
 -10  -3  -4    0.01    0.39
  10   3   4    0.39    0.57
 -11  -3  -4   15.70    1.57
 -11  -3  -4   14.25    1.15
  11   3   4   13.55    1.53
 -12  -3  -4   13.16    1.30
 -12  -3  -4    7.45    1.23
  12   3   4    6.58    1.15
 -13  -3  -4   11.64    1.54
 -13  -3  -4   13.21    1.43
  13   3   4   13.26    1.70
 -14  -3  -4    0.00    0.73
  14   3   4    1.58    1.01
 -15  -3  -4    0.83    0.93
  15   3   4    1.37    0.98
  11  -4  -4   11.98    1.51
  11  -4  -4   10.39    1.46
 -11   4   4   11.91    1.80
  10  -4  -4    5.15    1.02
  10  -4  -4    5.69    1.13
 -10   4   4    7.12    1.39
   9  -4  -4    0.15    0.61
   9  -4  -4   -0.38    0.50
  -9   4   4    0.03    0.72
   8  -4  -4    8.01    1.07
   8  -4  -4    7.97    1.10
  -8   4   4    7.60    1.26
   7  -4  -4   19.40    1.42
   7  -4  -4   19.52    1.33
  -7   4   4   21.27    1.57
  -7   4   4   19.02    1.13
   6  -4  -4   32.80    1.52
   6  -4  -4   32.78    1.68
  -6   4   4   31.43    1.77
  -6   4   4   33.64    1.40
   5  -4  -4   16.29    1.19
   5  -4  -4   16.97    1.03
  -5   4   4   18.91    1.31
  -5   4   4   17.34    0.98
   4  -4  -4   21.18    1.04
   4  -4  -4   24.67    1.31
  -4   4   4   21.97    1.32
  -4   4   4   22.82    1.06
   3  -4  -4   27.54    1.05
   3  -4  -4   26.90    1.30
  -3   4   4   25.61    1.07
  -3   4   4   26.43    1.34
   2  -4  -4   57.85    1.44
  -2   4   4   58.03    1.63
  -2   4   4   56.39    1.89
   1  -4  -4   60.69    1.82
   1  -4  -4   58.78    1.28
  -1   4   4   57.60    1.62
  -1   4   4   56.93    1.81
   0  -4  -4   23.80    1.07
   0  -4  -4   25.17    1.08
   0  -4  -4   23.48    0.60
   0   4   4   24.42    1.01
  -1  -4  -4    8.54    0.67
  -1  -4  -4    8.90    0.68
   1   4   4    8.84    0.33
   1   4   4    9.00    0.69
   1   4   4    8.67    0.32
  -2  -4  -4    0.33    0.29
  -2  -4  -4    0.35    0.35
   2   4   4    0.20    0.18
   2   4   4    0.70    0.37
  -3  -4  -4  120.88    2.38
  -3  -4  -4  118.71    2.72
   3   4   4  123.73    2.37
   3   4   4  125.59    2.78
  -4  -4  -4   77.45    2.09
  -4  -4  -4   79.88    1.61
   4   4   4   79.13    2.12
   4   4   4   83.67    1.91
  -5  -4  -4   32.19    1.31
  -5  -4  -4   30.21    1.30
  -5  -4  -4   32.40    0.74
   5   4   4   31.07    1.21
  -6  -4  -4    6.08    0.70
  -6  -4  -4    6.56    0.81
   6   4   4    7.63    0.78
  -7  -4  -4   11.90    0.98
  -7  -4  -4   12.94    0.96
   7   4   4   14.10    1.00
  -8  -4  -4   27.29    1.37
  -8  -4  -4   26.63    1.44
   8   4   4   27.70    1.44
  -9  -4  -4   18.39    1.30
  -9  -4  -4   18.87    1.20
   9   4   4   17.52    1.26
 -10  -4  -4   17.47    1.35
 -10  -4  -4   16.91    1.23
  10   4   4   18.68    1.44
 -11  -4  -4    1.32    0.67
 -11  -4  -4    1.53    0.59
  11   4   4    1.99    0.76
 -12  -4  -4    9.57    1.15
 -12  -4  -4   10.41    1.34
  12   4   4   12.49    1.55
 -13  -4  -4   16.85    1.57
 -13  -4  -4   19.50    1.91
  13   4   4   16.13    1.84
 -14  -4  -4   10.42    1.49
 -14  -4  -4    9.47    1.25
  14   4   4    9.88    1.56
 -15  -4  -4   14.93    1.86
  15   4   4   18.96    2.22
  11  -5  -4    4.78    1.12
 -11   5   4    5.07    1.33
  10  -5  -4    3.74    1.01
  10  -5  -4    5.31    1.08
 -10   5   4    3.84    1.15
   9  -5  -4    3.52    0.92
   9  -5  -4    5.98    1.07
  -9   5   4    3.21    1.04
   8  -5  -4    1.87    0.71
   8  -5  -4    2.64    0.76
  -8   5   4    1.41    0.79
   7  -5  -4    0.80    0.60
   7  -5  -4    0.59    0.54
  -7   5   4    2.20    0.88
   6  -5  -4   10.48    1.06
   6  -5  -4   13.69    1.37
  -6   5   4   15.37    1.54
  -6   5   4   11.71    1.07
   5  -5  -4   -0.23    0.45
   5  -5  -4    0.43    0.43
  -5   5   4    0.30    0.35
  -5   5   4    1.79    0.69
   4  -5  -4   14.54    1.11
   4  -5  -4   14.81    0.93
  -4   5   4   16.08    1.41
  -4   5   4   12.66    0.83
   3  -5  -4   25.97    1.37
   3  -5  -4   27.57    1.11
  -3   5   4   25.71    1.08
  -3   5   4   23.19    1.37
   2  -5  -4    0.13    0.38
   2  -5  -4    0.07    0.25
  -2   5   4    0.37    0.30
  -2   5   4    0.36    0.42
   1  -5  -4    0.65    0.27
   1  -5  -4    1.23    0.45
  -1   5   4    0.80    0.43
  -1   5   4    0.50    0.32
   0  -5  -4   16.28    0.62
   0  -5  -4   15.95    0.98
   0  -5  -4   16.52    0.97
   0   5   4   16.78    0.89
  -1  -5  -4  109.04    2.03
  -1  -5  -4  108.61    2.62
  -1  -5  -4  104.23    2.52
   1   5   4  111.16    2.52
  -2  -5  -4   11.79    0.76
  -2  -5  -4   12.54    0.85
   2   5   4   13.52    0.57
   2   5   4   13.55    0.55
   2   5   4   11.33    0.80
  -3  -5  -4    0.33    0.27
  -3  -5  -4    0.15    0.37
   3   5   4    0.47    0.25
   3   5   4    0.04    0.33
  -4  -5  -4    0.41    0.23
  -4  -5  -4   -0.01    0.32
   4   5   4   -0.12    0.23
  -5  -5  -4   29.79    1.32
  -5  -5  -4   28.91    1.27
  -5  -5  -4   28.74    0.81
   5   5   4   29.52    1.18
  -6  -5  -4   38.69    1.58
  -6  -5  -4   37.62    1.53
   6   5   4   39.63    1.47
  -7  -5  -4   20.50    1.21
  -7  -5  -4   20.68    1.20
   7   5   4   20.65    1.19
  -8  -5  -4    6.03    0.86
  -8  -5  -4    6.07    0.82
   8   5   4    6.95    0.90
  -9  -5  -4    7.32    0.99
  -9  -5  -4    6.19    0.87
   9   5   4    4.79    0.82
 -10  -5  -4   61.83    2.41
 -10  -5  -4   58.10    2.28
  10   5   4   66.61    2.52
 -11  -5  -4    8.44    1.07
 -11  -5  -4   11.16    1.35
  11   5   4   10.91    1.33
 -12  -5  -4   29.98    1.88
 -12  -5  -4   29.87    1.79
  12   5   4   27.81    1.89
 -13  -5  -4    6.27    1.16
 -13  -5  -4    7.49    1.13
  13   5   4    6.13    1.18
 -14  -5  -4    5.58    1.22
 -14  -5  -4    3.94    0.98
  14   5   4    4.88    1.18
 -15  -5  -4   10.96    1.56
 -15  -5  -4    8.53    1.34
  15   5   4    9.19    1.62
  10  -6  -4    2.49    0.91
 -10   6   4    2.11    1.15
   9  -6  -4   13.67    1.61
  -9   6   4   12.76    1.69
   8  -6  -4   31.44    2.01
   8  -6  -4   30.55    1.75
  -8   6   4   28.60    2.10
   7  -6  -4    6.99    0.98
   7  -6  -4    8.82    1.19
  -7   6   4   11.75    1.53
   6  -6  -4   -0.10    0.45
   6  -6  -4    0.25    0.54
  -6   6   4    0.37    0.68
   5  -6  -4    0.33    0.52
   5  -6  -4    0.93    0.49
  -5   6   4    0.19    0.50
   4  -6  -4   28.30    1.61
   4  -6  -4   30.60    1.35
  -4   6   4   28.00    1.68
  -4   6   4   29.78    1.19
   3  -6  -4   10.49    0.80
   3  -6  -4   10.07    1.07
  -3   6   4    8.06    0.98
  -3   6   4   12.73    0.78
   2  -6  -4    2.28    0.59
   2  -6  -4    2.72    0.46
  -2   6   4    3.25    0.49
  -2   6   4    2.65    0.62
   1  -6  -4    1.19    0.48
   1  -6  -4    0.98    0.32
  -1   6   4    0.27    0.42
  -1   6   4    1.60    0.40
   0  -6  -4   41.30    1.17
   0  -6  -4   40.44    1.58
   0   6   4   41.40    1.40
  -1  -6  -4   41.70    1.16
  -1  -6  -4   38.33    1.47
  -1  -6  -4   45.19    1.62
   1   6   4   38.48    1.40
  -2  -6  -4   73.87    2.16
  -2  -6  -4   73.96    2.02
  -2  -6  -4   76.53    1.73
   2   6   4   76.70    2.09
  -3  -6  -4    9.23    0.91
  -3  -6  -4    9.85    0.70
   3   6   4    8.49    0.84
   3   6   4   10.69    0.64
   3   6   4    8.99    0.57
  -4  -6  -4    8.65    0.61
  -4  -6  -4    8.49    0.86
   4   6   4    7.86    0.69
  -5  -6  -4   22.72    0.83
  -5  -6  -4   21.10    1.15
  -5  -6  -4   20.85    1.18
   5   6   4   23.14    1.05
  -6  -6  -4    2.44    0.31
  -6  -6  -4    2.46    0.54
  -6  -6  -4    2.48    0.62
   6   6   4    2.69    0.53
  -7  -6  -4   22.39    1.30
  -7  -6  -4   21.81    1.25
   7   6   4   21.44    1.19
  -8  -6  -4   26.54    1.44
  -8  -6  -4   23.63    1.36
   8   6   4   25.08    1.37
  -9  -6  -4   12.20    1.20
  -9  -6  -4   12.39    1.21
   9   6   4   15.27    1.40
 -10  -6  -4    2.07    0.69
 -10  -6  -4    3.97    0.81
  10   6   4    2.00    0.69
 -11  -6  -4   27.48    1.71
 -11  -6  -4   23.99    1.62
  11   6   4   24.00    1.70
 -12  -6  -4    1.14    0.71
 -12  -6  -4    1.60    0.71
  12   6   4    0.49    0.67
 -13  -6  -4   20.45    1.66
 -13  -6  -4   23.84    1.83
  13   6   4   23.59    2.18
 -14  -6  -4    2.21    0.91
 -14  -6  -4    4.99    1.06
  14   6   4    2.89    1.01
 -15  -6  -4   -0.20    0.74
 -15  -6  -4    0.87    0.74
  15   6   4    0.84    0.91
   9  -7  -4    2.08    0.91
  -9   7   4    2.63    1.13
   8  -7  -4    4.69    1.04
  -8   7   4    3.31    1.07
   7  -7  -4   17.30    1.78
   7  -7  -4   19.07    1.47
  -7   7   4   17.63    1.79
   6  -7  -4   28.94    1.86
   6  -7  -4   28.78    1.57
  -6   7   4   29.88    2.03
   5  -7  -4   16.61    1.55
   5  -7  -4   16.74    1.18
  -5   7   4   15.39    1.61
   4  -7  -4    0.49    0.59
   4  -7  -4    0.89    0.48
  -4   7   4    1.51    0.71
   3  -7  -4   18.09    1.34
   3  -7  -4   20.52    1.11
  -3   7   4   18.44    0.94
  -3   7   4   19.40    1.44
   2  -7  -4    0.84    0.49
   2  -7  -4    0.63    0.38
  -2   7   4    1.26    0.54
  -2   7   4    0.79    0.33
   1  -7  -4   13.12    1.18
   1  -7  -4   10.99    0.75
  -1   7   4    8.30    0.97
  -1   7   4   11.87    0.78
   0  -7  -4   10.07    0.98
   0  -7  -4   10.03    0.67
   0   7   4   13.08    1.20
   0   7   4    9.50    0.81
  -1  -7  -4    8.45    0.92
  -1  -7  -4    8.21    0.62
  -1  -7  -4    7.90    0.85
   1   7   4    8.55    0.80
  -2  -7  -4   11.55    0.86
  -2  -7  -4   12.40    1.08
  -2  -7  -4   10.74    0.70
   2   7   4   12.16    0.84
  -3  -7  -4   13.97    1.00
  -3  -7  -4   12.30    0.83
   3   7   4   14.20    0.96
  -4  -7  -4   24.71    1.07
  -4  -7  -4   26.99    1.29
   4   7   4   25.75    1.09
   4   7   4   28.45    1.10
  -5  -7  -4   55.93    1.54
  -5  -7  -4   57.97    1.95
  -5  -7  -4   54.56    1.97
   5   7   4   54.60    1.74
  -6  -7  -4    8.28    0.90
  -6  -7  -4    8.52    0.97
  -6  -7  -4    9.02    0.59
   6   7   4   10.91    0.99
  -7  -7  -4    7.71    0.91
  -7  -7  -4    6.87    0.92
   7   7   4    8.81    0.96
   7   7   4    6.86    0.43
  -8  -7  -4    9.37    1.02
  -8  -7  -4    8.16    0.99
   8   7   4   10.61    1.14
  -9  -7  -4   61.27    2.39
  -9  -7  -4   65.42    2.37
   9   7   4   60.61    2.34
 -10  -7  -4   24.13    1.53
 -10  -7  -4   25.05    1.64
  10   7   4   23.00    1.57
 -11  -7  -4    0.11    0.53
 -11  -7  -4   -0.54    0.46
  11   7   4    0.32    0.62
 -12  -7  -4    4.65    1.04
 -12  -7  -4    4.13    0.96
  12   7   4    5.33    1.17
 -13  -7  -4    0.66    0.75
 -13  -7  -4    0.41    0.67
  13   7   4    1.11    0.85
 -14  -7  -4   43.11    2.46
 -14  -7  -4   41.90    2.39
  14   7   4   43.93    2.68
 -15  -7  -4    0.63    0.78
 -15  -7  -4    2.97    0.98
  15   7   4    3.23    1.17
   9  -8  -4    9.00    1.51
  -9   8   4    7.62    1.53
   8  -8  -4    1.78    0.89
  -8   8   4    0.60    0.84
   7  -8  -4    4.89    1.12
  -7   8   4    6.74    1.29
   6  -8  -4    9.14    1.34
  -6   8   4    7.36    1.20
   5  -8  -4   20.33    1.86
   5  -8  -4   18.18    1.34
  -5   8   4   18.79    1.86
   4  -8  -4   31.08    1.89
   4  -8  -4   32.01    1.56
  -4   8   4   27.30    1.83
   3  -8  -4   -0.08    0.36
   3  -8  -4    0.80    0.59
  -3   8   4   -0.03    0.49
   2  -8  -4   -0.20    0.41
   2  -8  -4    0.10    0.38
  -2   8   4    0.23    0.32
  -2   8   4    0.59    0.58
   1  -8  -4    4.75    0.81
   1  -8  -4    7.11    0.75
  -1   8   4    6.26    0.69
  -1   8   4    6.04    0.99
   0  -8  -4   12.55    1.18
   0  -8  -4   11.46    0.81
   0   8   4   13.49    0.89
   0   8   4   12.83    1.25
  -1  -8  -4   14.20    1.07
  -1  -8  -4   14.40    0.86
   1   8   4   14.08    0.93
  -2  -8  -4    0.12    0.30
  -2  -8  -4    0.37    0.43
  -2  -8  -4   -0.25    0.32
   2   8   4    0.10    0.33
  -3  -8  -4    0.58    0.40
  -3  -8  -4    0.63    0.33
  -3  -8  -4    0.92    0.46
   3   8   4    0.49    0.41
  -4  -8  -4   24.99    1.33
  -4  -8  -4   27.76    1.24
   4   8   4   26.61    1.16
   4   8   4   27.60    1.20
  -5  -8  -4   -0.06    0.39
  -5  -8  -4    0.06    0.36
  -5  -8  -4    1.50    0.41
   5   8   4    0.37    0.36
   5   8   4    0.86    0.37
  -6  -8  -4    6.31    0.63
  -6  -8  -4    5.22    0.81
  -6  -8  -4    5.78    0.85
   6   8   4    4.83    0.69
  -7  -8  -4    2.55    0.67
  -7  -8  -4    1.18    0.52
   7   8   4    3.43    0.44
   7   8   4    2.15    0.60
  -8  -8  -4    0.75    0.51
  -8  -8  -4    0.90    0.51
   8   8   4    0.85    0.53
  -9  -8  -4   15.77    1.25
  -9  -8  -4   12.58    1.33
   9   8   4   16.89    1.53
 -10  -8  -4   11.55    1.41
 -10  -8  -4    7.89    1.07
  10   8   4   10.37    1.31
 -11  -8  -4   19.08    1.52
 -11  -8  -4   21.88    1.69
  11   8   4   21.03    1.61
 -12  -8  -4    1.34    0.76
 -12  -8  -4   -1.01    0.51
  12   8   4    2.04    0.84
 -13  -8  -4   -0.21    0.59
 -13  -8  -4   -0.20    0.66
  13   8   4   -0.22    0.78
 -14  -8  -4    4.36    1.07
 -14  -8  -4    1.68    0.90
  14   8   4    2.49    1.11
 -15  -8  -4    4.81    1.25
 -15  -8  -4    6.26    1.25
  15   8   4    3.66    1.31
   8  -9  -4    9.16    1.52
  -8   9   4    6.79    1.49
   7  -9  -4   11.37    1.66
  -7   9   4    6.09    1.24
   6  -9  -4    0.97    0.78
  -6   9   4    0.66    0.82
   5  -9  -4    5.68    1.18
  -5   9   4    4.01    1.04
   4  -9  -4    5.41    1.12
  -4   9   4    6.52    1.22
   3  -9  -4   11.96    1.45
   3  -9  -4   12.62    1.20
  -3   9   4   11.28    1.38
   2  -9  -4   14.64    1.07
   2  -9  -4   13.40    1.37
  -2   9   4   13.90    1.46
   1  -9  -4    0.00    0.38
   1  -9  -4    0.19    0.51
  -1   9   4   -0.45    0.29
  -1   9   4    0.38    0.57
   0  -9  -4    0.03    0.37
   0  -9  -4    0.65    0.53
   0   9   4    0.25    0.53
   0   9   4    0.26    0.36
  -1  -9  -4   34.38    1.71
  -1  -9  -4   35.06    1.42
   1   9   4   36.36    1.51
   1   9   4   34.77    1.79
  -2  -9  -4   80.04    2.25
  -2  -9  -4   85.44    2.73
  -2  -9  -4   82.19    2.59
   2   9   4   77.11    2.37
  -3  -9  -4   53.11    1.96
  -3  -9  -4   53.48    1.80
  -3  -9  -4   54.01    2.08
   3   9   4   54.94    2.02
  -4  -9  -4    6.65    0.91
  -4  -9  -4    7.43    0.85
  -5  -9  -4    0.41    0.49
  -5  -9  -4    2.08    0.60
  -5  -9  -4    1.28    0.46
   5   9   4    2.03    0.50
   5   9   4    2.09    0.54
  -6  -9  -4   12.08    1.25
  -6  -9  -4   10.58    1.05
  -6  -9  -4   11.72    0.84
   6   9   4   11.41    1.06
  -7  -9  -4   14.83    1.18
  -7  -9  -4   15.90    1.48
   7   9   4   15.70    1.14
  -8  -9  -4   19.46    1.35
  -8  -9  -4   20.99    1.48
   8   9   4   19.61    1.37
  -9  -9  -4   10.25    1.31
  -9  -9  -4    7.52    1.02
   9   9   4    6.86    1.04
 -10  -9  -4   -0.16    0.54
 -10  -9  -4    0.54    0.54
  10   9   4   -0.07    0.55
 -11  -9  -4   20.92    1.60
 -11  -9  -4   21.01    1.91
  11   9   4   18.95    1.81
 -12  -9  -4    1.78    0.76
 -12  -9  -4    1.22    0.87
  12   9   4    1.23    0.82
 -13  -9  -4   12.27    1.61
 -13  -9  -4    9.70    1.34
  13   9   4   12.27    1.68
 -14  -9  -4    1.21    0.90
 -14  -9  -4    1.43    0.80
  14   9   4    1.22    0.97
 -15  -9  -4    0.03    0.82
 -15  -9  -4    0.40    0.80
  15   9   4    1.14    1.03
   7 -10  -4   10.95    1.63
  -7  10   4   10.08    1.76
   6 -10  -4    7.90    1.43
  -6  10   4    4.05    1.15
   5 -10  -4   10.49    1.51
  -5  10   4   11.69    1.55
   4 -10  -4    1.29    0.83
  -4  10   4   -0.54    0.69
   3 -10  -4    0.18    0.65
  -3  10   4   -0.02    0.63
   2 -10  -4    8.98    1.25
  -2  10   4   11.99    1.48
   1 -10  -4   12.37    1.13
   1 -10  -4   10.88    1.35
  -1  10   4    8.35    1.22
   0 -10  -4    7.89    0.90
   0 -10  -4    8.05    1.14
   0  10   4    7.62    1.21
   0  10   4    8.43    0.87
  -1 -10  -4    0.71    0.58
  -1 -10  -4    1.55    0.53
   1  10   4    1.31    0.69
   1  10   4    0.10    0.41
  -2 -10  -4    3.24    0.63
  -2 -10  -4    2.99    0.70
   2  10   4    3.10    0.64
  -3 -10  -4   29.50    1.58
  -3 -10  -4   30.44    1.65
  -3 -10  -4   28.39    1.41
   3  10   4   26.44    1.48
  -4 -10  -4   26.48    1.43
  -4 -10  -4   24.89    1.49
  -4 -10  -4   27.15    1.40
   4  10   4   27.14    1.50
  -5 -10  -4    5.84    0.85
  -5 -10  -4    6.45    0.95
  -5 -10  -4    6.25    0.91
   5  10   4    6.36    0.82
   5  10   4    5.35    0.79
  -6 -10  -4    3.66    0.68
  -6 -10  -4    4.85    0.92
  -6 -10  -4    4.04    0.77
   6  10   4    4.67    0.78
   6  10   4    5.23    0.79
  -7 -10  -4    1.37    0.69
  -7 -10  -4    1.89    0.60
   7  10   4    2.86    0.70
  -8 -10  -4   27.04    1.76
  -8 -10  -4   26.25    1.58
   8  10   4   28.76    1.66
  -9 -10  -4    0.77    0.59
  -9 -10  -4    0.91    0.68
   9  10   4    1.10    0.65
 -10 -10  -4   18.05    1.62
 -10 -10  -4   13.86    1.52
  10  10   4   14.58    1.52
 -11 -10  -4    3.12    0.84
 -11 -10  -4    2.62    0.87
  11  10   4    1.43    0.80
 -12 -10  -4   -0.24    0.69
 -12 -10  -4    0.52    0.67
  12  10   4    0.80    0.76
 -13 -10  -4   13.75    1.76
 -13 -10  -4   13.54    1.57
  13  10   4   16.23    1.89
 -14 -10  -4    5.40    1.30
 -14 -10  -4    6.47    1.26
  14  10   4    4.47    1.20
   6 -11  -4    9.40    1.60
  -6  11   4    8.88    1.54
   5 -11  -4   16.27    1.82
  -5  11   4   16.99    2.12
   4 -11  -4   14.24    1.80
  -4  11   4   12.57    1.78
   3 -11  -4   16.17    1.78
  -3  11   4   18.44    2.01
   2 -11  -4    7.09    1.26
  -2  11   4    5.35    1.18
   1 -11  -4   12.77    1.48
  -1  11   4   13.16    1.60
   0 -11  -4   23.30    1.70
   0  11   4   22.74    1.79
  -1 -11  -4    5.33    1.01
  -1 -11  -4    5.27    0.83
   1  11   4    6.05    1.08
  -2 -11  -4    2.01    0.69
  -2 -11  -4    3.29    0.72
   2  11   4    0.76    0.66
   2  11   4    1.40    0.60
  -3 -11  -4   45.60    1.87
  -3 -11  -4   42.82    2.00
   3  11   4   41.78    1.90
  -4 -11  -4    8.96    1.17
  -4 -11  -4   11.03    1.17
  -4 -11  -4   11.70    1.16
   4  11   4   11.18    1.21
  -5 -11  -4   40.52    1.85
  -5 -11  -4   48.29    2.11
   5  11   4   45.19    1.91
   5  11   4   42.98    1.84
  -6 -11  -4   17.31    1.35
  -6 -11  -4   17.78    1.24
  -6 -11  -4   17.56    1.41
   6  11   4   15.73    1.17
   6  11   4   18.68    1.32
  -7 -11  -4    4.93    1.03
  -7 -11  -4    6.63    0.99
   7  11   4    4.58    0.86
  -8 -11  -4    3.28    0.79
  -8 -11  -4    3.97    1.00
   8  11   4    3.41    0.79
  -9 -11  -4    1.42    0.83
  -9 -11  -4    1.64    0.71
   9  11   4    3.96    0.94
 -10 -11  -4   22.17    1.63
 -10 -11  -4   23.31    1.82
  10  11   4   19.64    1.81
 -11 -11  -4    8.95    1.41
 -11 -11  -4    5.16    1.01
  11  11   4    3.26    0.97
 -12 -11  -4    0.46    0.70
 -12 -11  -4    0.50    0.74
  12  11   4    0.25    0.68
 -13 -11  -4    5.19    1.25
 -13 -11  -4    3.23    0.94
  13  11   4    3.79    1.17
 -14 -11  -4    3.09    1.17
  14  11   4    4.18    1.21
   4 -12  -4    1.13    0.92
  -4  12   4    1.03    0.94
   3 -12  -4   36.13    2.44
  -3  12   4   34.28    2.46
   2 -12  -4    8.87    1.44
  -2  12   4    5.52    1.24
   1 -12  -4    2.93    1.00
  -1  12   4    3.21    1.08
   0 -12  -4    3.95    1.03
   0  12   4    4.42    1.12
  -1 -12  -4    4.19    0.99
   1  12   4    2.09    0.88
  -2 -12  -4    4.08    0.91
  -2 -12  -4    3.53    0.90
   2  12   4    2.66    0.94
  -3 -12  -4   16.59    1.29
  -3 -12  -4   17.42    1.63
   3  12   4   15.51    1.56
   3  12   4   14.78    1.36
  -4 -12  -4   13.79    1.31
  -4 -12  -4   15.74    1.52
  -4 -12  -4   13.94    1.42
   4  12   4   16.20    1.31
  -5 -12  -4    1.78    0.68
  -5 -12  -4    1.45    0.72
   5  12   4    1.00    0.65
   5  12   4    0.40    0.50
   5  12   4    1.76    0.60
  -6 -12  -4    1.03    0.66
  -6 -12  -4    0.84    0.56
  -6 -12  -4    1.58    0.74
   6  12   4    0.89    0.58
   6  12   4    1.66    0.56
  -7 -12  -4   14.16    1.46
  -7 -12  -4   16.20    1.64
   7  12   4   17.16    1.36
   7  12   4   16.32    1.51
  -8 -12  -4    5.39    1.08
  -8 -12  -4    6.25    1.09
   8  12   4    6.92    1.07
  -9 -12  -4    1.43    0.80
  -9 -12  -4    0.05    0.57
   9  12   4    0.22    0.65
 -10 -12  -4    2.72    0.87
 -10 -12  -4    4.19    1.13
  10  12   4    3.74    0.99
 -11 -12  -4   -0.16    0.76
 -11 -12  -4    0.22    0.67
  11  12   4   -0.56    0.60
 -12 -12  -4   37.11    2.52
  12  12   4   41.47    2.54
 -13 -12  -4    3.68    1.21
  13  12   4    3.31    1.15
   3 -13  -4    1.06    0.90
  -3  13   4    1.06    0.97
   2 -13  -4   10.90    1.58
  -2  13   4   13.19    1.81
   1 -13  -4    6.29    1.24
  -1  13   4    8.46    1.51
   0 -13  -4    2.78    0.98
   0  13   4    2.45    1.05
  -1 -13  -4    0.11    0.68
   1  13   4    0.84    0.82
  -2 -13  -4   23.52    1.87
   2  13   4   25.84    2.03
  -3 -13  -4   14.59    1.59
   3  13   4   13.63    1.63
  -4 -13  -4   26.76    1.88
  -4 -13  -4   26.13    1.84
   4  13   4   26.82    1.76
   4  13   4   31.64    2.04
  -5 -13  -4   11.42    1.36
  -5 -13  -4    9.85    1.34
   5  13   4    9.86    1.30
  -6 -13  -4    0.76    0.65
  -6 -13  -4    0.26    0.53
   6  13   4   -0.26    0.54
   6  13   4   -0.99    0.45
  -7 -13  -4    6.15    1.17
  -7 -13  -4    6.97    1.14
   7  13   4    9.61    1.28
   7  13   4    6.25    1.03
  -8 -13  -4    0.80    0.75
  -8 -13  -4    0.91    0.68
   8  13   4    0.15    0.61
  -9 -13  -4   16.84    1.67
  -9 -13  -4   17.28    1.86
   9  13   4   14.86    1.68
 -10 -13  -4    3.12    1.04
  10  13   4    5.41    1.18
 -11 -13  -4   -0.57    0.71
  11  13   4   -0.27    0.74
 -12 -13  -4    4.75    1.29
  12  13   4    3.76    1.21
   1 -14  -4    6.47    1.29
  -1  14   4    7.12    1.52
   0 -14  -4   10.19    1.62
   0  14   4   12.40    1.73
  -1 -14  -4   16.93    1.90
   1  14   4   16.76    1.93
  -2 -14  -4   -0.79    0.68
   2  14   4    0.74    0.86
  -3 -14  -4    1.49    0.85
   3  14   4    0.53    0.81
  -4 -14  -4   20.90    1.91
   4  14   4   18.78    1.91
  -5 -14  -4   30.42    2.00
   5  14   4   28.03    1.92
   5  14   4   29.10    2.04
  -6 -14  -4   28.51    2.00
   6  14   4   26.76    1.85
   6  14   4   31.50    1.98
   6  14   4   28.28    1.86
  -7 -14  -4    3.59    0.98
   7  14   4    4.65    1.02
   7  14   4    3.48    0.90
  -8 -14  -4   -0.25    0.64
   8  14   4    0.96    0.70
  -9 -14  -4   17.95    1.93
   9  14   4   20.56    1.94
 -10 -14  -4   11.49    1.66
  10  14   4   10.76    1.57
 -11 -14  -4   22.62    2.24
  11  14   4   20.35    2.09
  -2 -15  -4    5.02    1.23
   2  15   4    6.41    1.44
  -3 -15  -4    5.25    1.21
   3  15   4    6.42    1.38
  -4 -15  -4   -0.05    0.70
   4  15   4   -0.99    0.63
   5  15   4    0.42    0.75
   7  15   4    5.15    1.12
  -9 -15  -4    0.29    0.82
   9  15   4   -0.35    0.66
   6  12  -5    4.72    1.17
  -6 -12   5    5.13    1.23
  -6 -12   5    6.97    1.50
   5  12  -5    4.63    1.16
  -5 -12   5    3.48    1.21
   4  12  -5    4.76    1.16
  -4 -12   5    2.82    1.15
   3  12  -5   35.07    2.50
  -3 -12   5   33.87    2.48
   2  12  -5    7.97    1.52
  -2 -12   5    9.68    1.61
   1  12  -5   10.48    1.78
  -1 -12   5    8.17    1.53
   0  12  -5   -0.92    0.81
   0 -12   5    1.18    0.93
   8  11  -5    0.80    0.90
   8  11  -5    0.12    0.92
  -8 -11   5    0.18    0.80
   7  11  -5    4.57    1.25
   7  11  -5    4.69    1.32
   7  11  -5    2.80    0.93
  -7 -11   5    3.55    1.03
   6  11  -5   10.33    1.44
  -6 -11   5   10.94    1.72
  -6 -11   5   11.32    1.57
   5  11  -5   11.15    1.58
  -5 -11   5    6.46    1.37
  -5 -11   5    8.92    1.39
   4  11  -5    0.93    0.77
  -4 -11   5    0.67    0.84
   3  11  -5    0.59    0.75
  -3 -11   5    0.56    0.84
   2  11  -5   20.97    2.13
  -2 -11   5   15.98    1.86
   1  11  -5    4.57    1.16
  -1 -11   5    4.80    1.19
   0  11  -5   15.27    1.87
   0 -11   5   15.91    1.92
  -1  11  -5   -0.97    0.71
   1 -11   5    0.62    0.84
  -2  11  -5    0.61    0.88
   2 -11   5    0.48    0.89
  -3  11  -5   10.23    1.65
   3 -11   5    9.15    1.64
  10  10  -5   19.04    2.18
 -10 -10   5   20.25    2.22
   9  10  -5   16.66    1.97
   9  10  -5   16.54    1.94
  -9 -10   5   19.90    2.19
   8  10  -5   53.80    2.85
   8  10  -5   49.31    2.90
  -8 -10   5   50.87    2.87
   7  10  -5   -0.46    0.69
   7  10  -5   -0.46    0.71
   7  10  -5    1.50    0.69
  -7 -10   5   -0.08    0.68
   6  10  -5   -0.44    0.53
  -6 -10   5   -0.34    0.66
  -6 -10   5    0.00    0.65
   5  10  -5   23.43    1.84
  -5 -10   5   23.90    1.96
  -5 -10   5   24.53    1.85
   4  10  -5   28.84    1.98
  -4 -10   5   28.37    1.88
   3  10  -5   24.46    1.88
  -3 -10   5   23.43    1.92
   2  10  -5   -1.14    0.57
  -2 -10   5   -0.82    0.58
   1  10  -5    0.33    0.72
  -1 -10   5    0.62    0.76
   0  10  -5   18.52    1.92
   0 -10   5   15.24    1.73
  -1  10  -5   40.79    2.52
   1 -10   5   42.58    2.58
  -2  10  -5   15.99    1.92
   2 -10   5   14.84    1.82
  -3  10  -5    2.24    1.07
   3 -10   5    3.01    1.05
  -4  10  -5    2.97    1.14
   4 -10   5    2.50    1.07
  -5  10  -5   14.50    1.94
   5 -10   5   15.73    2.08
  11   9  -5    9.39    1.71
 -11  -9   5   13.15    1.92
  10   9  -5    0.09    0.72
 -10  -9   5   -0.15    0.77
   9   9  -5    4.45    1.23
   9   9  -5    6.02    1.36
  -9  -9   5    5.85    1.35
   8   9  -5    6.17    1.35
   8   9  -5    5.73    1.23
  -8  -9   5    6.42    1.27
   7   9  -5   10.14    1.45
   7   9  -5    8.90    1.47
   7   9  -5    5.59    1.02
  -7  -9   5    7.72    1.37
   6   9  -5   20.45    1.56
  -6  -9   5   25.76    1.86
  -6  -9   5   25.22    1.94
   5   9  -5    1.82    0.79
  -5  -9   5    4.00    0.92
  -5  -9   5    2.55    0.89
   4   9  -5    0.74    0.68
  -4  -9   5    2.18    0.81
  -4  -9   5    0.36    0.62
   3   9  -5    4.95    1.02
  -3  -9   5    6.01    1.18
  -3  -9   5    6.37    1.01
   2   9  -5   17.00    1.72
  -2  -9   5   15.68    1.65
  -2  -9   5   18.65    1.41
   1   9  -5   15.52    1.66
  -1  -9   5   13.52    1.59
   0   9  -5    1.65    0.78
   0  -9   5   -0.13    0.65
  -1   9  -5    6.06    1.20
   1  -9   5    4.36    1.04
  -2   9  -5   23.66    1.93
   2  -9   5   19.74    1.96
  -3   9  -5   16.77    1.87
   3  -9   5   16.56    1.90
  -4   9  -5   15.71    1.88
   4  -9   5   15.46    1.87
  -5   9  -5    1.00    0.84
  -5   9  -5    0.21    0.80
   5  -9   5   -0.96    0.65
  -6   9  -5    0.20    0.82
  -6   9  -5   -1.52    0.67
   6  -9   5    0.27    0.80
  11   8  -5   22.26    2.27
 -11  -8   5   22.49    2.26
  10   8  -5    4.02    1.15
 -10  -8   5    4.57    1.19
   9   8  -5    8.02    1.42
  -9  -8   5    6.23    1.24
   8   8  -5    0.65    0.57
   8   8  -5   -0.13    0.66
   8   8  -5    0.34    0.74
  -8  -8   5   -0.07    0.73
   7   8  -5    4.57    0.89
   7   8  -5    4.73    1.11
   7   8  -5    5.25    1.15
  -7  -8   5    5.68    1.17
   6   8  -5   17.68    1.35
  -6  -8   5   16.29    1.67
   5   8  -5   15.22    1.45
  -5  -8   5   16.37    1.61
  -5  -8   5   16.04    1.71
   4   8  -5   15.85    1.52
  -4  -8   5   15.05    1.47
  -4  -8   5   15.95    1.69
   3   8  -5   15.89    1.55
  -3  -8   5   13.53    1.35
  -3  -8   5   14.45    1.54
   2   8  -5   18.89    1.71
  -2  -8   5   18.51    1.77
  -2  -8   5   16.44    1.29
   1   8  -5   18.25    1.67
  -1  -8   5   18.04    1.27
  -1  -8   5   13.18    1.42
   0   8  -5   20.15    1.64
   0  -8   5   23.73    1.70
  -1   8  -5   12.26    1.55
   1  -8   5   13.97    1.57
  -2   8  -5    2.85    0.80
  -2   8  -5    1.03    0.69
   2  -8   5    2.76    0.86
  -3   8  -5   12.06    1.55
  -3   8  -5   12.75    1.33
   3  -8   5   10.99    1.50
  -4   8  -5   20.24    1.96
  -4   8  -5   20.09    1.61
   4  -8   5   15.44    1.66
  -5   8  -5   10.99    1.52
  -5   8  -5   10.35    1.41
   5  -8   5   10.13    1.50
  -6   8  -5    0.45    0.76
  -6   8  -5    0.98    0.79
   6  -8   5   -0.04    0.75
  -7   8  -5    2.71    1.02
  -7   8  -5    3.77    1.12
   7  -8   5    3.13    1.13
  -8   8  -5   10.26    1.58
  -8   8  -5   12.73    1.80
   8  -8   5   12.56    1.80
  12   7  -5    3.23    1.16
 -12  -7   5    3.56    1.24
  11   7  -5    0.30    0.82
 -11  -7   5    1.01    0.88
  10   7  -5    1.46    0.85
 -10  -7   5    1.04    0.87
   9   7  -5   26.45    2.00
  -9  -7   5   24.80    2.01
   8   7  -5    1.48    0.63
   8   7  -5    2.58    0.88
   8   7  -5    1.73    0.82
  -8  -7   5    1.08    0.80
   7   7  -5   16.70    1.69
   7   7  -5   19.34    1.75
   7   7  -5   16.26    1.32
  -7  -7   5   20.49    1.65
   6   7  -5    3.41    0.76
   6   7  -5    3.81    0.88
   6   7  -5    3.25    0.83
  -6  -7   5    4.61    0.95
   5   7  -5   17.10    1.33
  -5  -7   5   18.54    1.45
  -5  -7   5   18.56    1.47
   4   7  -5   33.75    1.79
  -4  -7   5   34.06    1.79
  -4  -7   5   33.21    1.85
   3   7  -5   42.46    2.02
  -3  -7   5   44.95    1.96
  -3  -7   5   44.49    2.13
   2   7  -5   38.51    1.95
  -2  -7   5   43.02    1.83
  -2  -7   5   40.23    2.03
   1   7  -5    5.96    0.99
  -1  -7   5    5.33    0.93
  -1  -7   5    6.45    0.84
   0   7  -5    5.85    0.97
   0  -7   5    5.98    0.78
   0  -7   5    6.27    1.01
  -1   7  -5   38.58    2.05
  -1   7  -5   38.50    1.59
   1  -7   5   38.25    2.04
  -2   7  -5   48.36    1.91
  -2   7  -5   47.10    2.31
   2  -7   5   47.07    2.30
  -3   7  -5   10.66    1.15
  -3   7  -5   10.08    1.34
   3  -7   5   10.99    1.36
  -4   7  -5   12.90    1.37
  -4   7  -5   15.62    1.67
   4  -7   5   11.40    1.49
  -5   7  -5    2.19    0.87
  -5   7  -5    0.92    0.74
   5  -7   5    2.05    0.88
  -6   7  -5   22.89    1.84
  -6   7  -5   20.44    1.91
   6  -7   5   19.05    1.90
  -7   7  -5    5.19    1.16
  -7   7  -5    2.88    1.02
   7  -7   5    3.34    1.07
  -8   7  -5    5.85    1.32
  -8   7  -5    6.04    1.27
   8  -7   5    6.00    1.31
  -9   7  -5   -0.28    0.81
  -9   7  -5   -0.48    0.62
   9  -7   5   -0.49    0.77
  12   6  -5   33.01    2.48
 -12  -6   5   30.84    2.41
  11   6  -5    6.01    1.30
 -11  -6   5    4.75    1.16
  10   6  -5    0.62    0.77
 -10  -6   5   -0.80    0.70
   9   6  -5   -0.49    0.57
  -9  -6   5   -0.02    0.68
   8   6  -5    8.20    1.28
   8   6  -5   11.02    1.20
  -8  -6   5   10.42    1.33
   7   6  -5    4.09    0.92
   7   6  -5    3.17    0.75
   7   6  -5    2.75    0.82
  -7  -6   5    3.54    0.91
   6   6  -5    5.82    1.00
   6   6  -5    4.73    0.82
   6   6  -5    3.66    0.91
  -6  -6   5    4.64    0.95
   5   6  -5   12.80    1.21
  -5  -6   5   14.59    1.44
  -5  -6   5   16.94    1.36
   4   6  -5    5.42    0.86
  -4  -6   5    8.22    1.12
  -4  -6   5    6.02    0.93
   3   6  -5    0.73    0.53
  -3  -6   5   -0.12    0.46
  -3  -6   5    0.41    0.51
   2   6  -5    6.86    0.94
  -2  -6   5    5.88    0.85
  -2  -6   5    5.09    0.86
   1   6  -5   -0.10    0.45
   1   6  -5    0.13    0.27
  -1  -6   5    0.84    0.56
  -1  -6   5    0.69    0.43
   0   6  -5   12.77    0.81
   0   6  -5   15.04    1.42
   0  -6   5   13.24    0.94
   0  -6   5   11.77    1.21
  -1   6  -5   17.49    1.59
  -1   6  -5   16.33    1.00
   1  -6   5   17.40    1.56
   1  -6   5   15.27    0.93
  -2   6  -5    1.37    0.63
  -2   6  -5    1.24    0.50
   2  -6   5    0.80    0.54
  -3   6  -5   12.48    1.15
  -3   6  -5    9.88    1.19
   3  -6   5    9.67    1.26
  -4   6  -5   13.26    1.43
  -4   6  -5   16.08    1.31
   4  -6   5   12.72    1.46
  -5   6  -5    2.85    0.84
  -5   6  -5    3.46    0.92
   5  -6   5    1.91    0.78
  -6   6  -5    0.24    0.63
  -6   6  -5    0.29    0.64
   6  -6   5    0.38    0.65
  -7   6  -5    3.19    0.92
  -7   6  -5    1.92    0.88
   7  -6   5    1.83    0.82
  -8   6  -5    9.65    1.50
  -8   6  -5    7.58    1.28
   8  -6   5   10.56    1.51
  -9   6  -5    4.43    1.16
  -9   6  -5    5.67    1.20
   9  -6   5    7.16    1.45
 -10   6  -5    0.96    0.78
 -10   6  -5   -0.12    0.89
  10  -6   5    0.64    0.83
  13   5  -5    3.80    1.24
 -13  -5   5    5.79    1.43
  12   5  -5    6.13    1.33
 -12  -5   5    6.67    1.40
  11   5  -5    6.53    1.30
 -11  -5   5    7.37    1.42
  10   5  -5   21.56    2.03
 -10  -5   5   27.38    2.02
   9   5  -5    3.10    0.69
   9   5  -5    3.48    0.97
  -9  -5   5    1.70    0.83
   8   5  -5    0.13    0.47
   8   5  -5    1.30    0.68
  -8  -5   5    2.16    0.78
   7   5  -5   22.21    1.57
   7   5  -5   21.50    1.54
   7   5  -5   23.93    1.41
  -7  -5   5   21.30    1.58
   6   5  -5   27.28    1.60
   6   5  -5   26.83    1.46
   6   5  -5   24.98    1.59
  -6  -5   5   25.01    1.63
   5   5  -5   97.13    2.89
  -5  -5   5  102.69    3.19
   4   5  -5    0.72    0.46
  -4  -5   5    1.50    0.62
  -4  -5   5    0.74    0.54
   3   5  -5    0.03    0.41
  -3  -5   5    0.96    0.48
  -3  -5   5    0.42    0.45
   2   5  -5    6.59    0.87
  -2  -5   5    7.36    0.89
  -2  -5   5    8.06    0.93
   1   5  -5   41.47    1.78
   1   5  -5   37.81    1.04
  -1  -5   5   39.47    1.78
  -1  -5   5   37.96    1.55
   0   5  -5   18.85    0.85
   0   5  -5   18.51    1.25
   0  -5   5   16.64    1.01
   0  -5   5   16.05    1.18
  -1   5  -5   18.56    0.98
  -1   5  -5   20.91    1.35
   1  -5   5   18.46    1.30
   1  -5   5   18.03    0.96
  -2   5  -5   -0.42    0.43
  -2   5  -5   -0.22    0.34
   2  -5   5   -0.04    0.27
   2  -5   5    0.22    0.47
  -3   5  -5   11.66    1.21
  -3   5  -5   12.18    1.10
   3  -5   5    8.34    1.09
  -4   5  -5   46.37    2.12
  -4   5  -5   46.59    1.97
   4  -5   5   48.88    2.21
  -5   5  -5   22.78    1.54
  -5   5  -5   21.69    1.48
   5  -5   5   20.92    1.56
  -6   5  -5    3.65    0.92
  -6   5  -5    4.00    0.88
   6  -5   5    3.09    0.84
  -7   5  -5    0.55    0.69
  -7   5  -5   -0.27    0.52
   7  -5   5   -0.11    0.72
  -8   5  -5    5.68    1.17
  -8   5  -5    7.72    1.18
   8  -5   5    7.07    1.28
  -9   5  -5   19.61    1.81
  -9   5  -5   20.94    2.11
   9  -5   5   18.82    1.92
 -10   5  -5    8.59    1.32
 -10   5  -5   10.42    1.60
  10  -5   5    7.81    1.48
 -11   5  -5    4.18    1.23
  11  -5   5    3.90    1.25
  13   4  -5    6.16    1.44
 -13  -4   5    5.50    1.30
  12   4  -5   -0.55    0.72
 -12  -4   5    0.20    0.84
  11   4  -5   -0.37    0.67
 -11  -4   5   -0.27    0.71
  10   4  -5    5.39    1.11
 -10  -4   5    1.43    0.81
   9   4  -5    7.30    1.17
   9   4  -5    7.61    0.96
  -9  -4   5    9.63    1.30
   8   4  -5   13.50    1.10
   8   4  -5   11.19    1.31
  -8  -4   5   12.80    1.43
   7   4  -5    0.03    0.41
   7   4  -5   -0.84    0.43
  -7  -4   5    0.12    0.56
   6   4  -5   -0.03    0.46
   6   4  -5    0.07    0.39
   6   4  -5    0.48    0.49
  -6  -4   5   -0.17    0.43
   5   4  -5    0.42    0.39
   5   4  -5    0.21    0.44
   5   4  -5    0.12    0.44
  -5  -4   5    0.95    0.52
   4   4  -5   20.44    1.22
  -4  -4   5   18.04    1.24
  -4  -4   5   19.46    1.27
   3   4  -5    5.75    0.79
  -3  -4   5    4.65    0.76
  -3  -4   5    4.90    0.77
   2   4  -5    3.11    0.61
  -2  -4   5    1.62    0.51
  -2  -4   5    2.69    0.63
   1   4  -5   10.66    1.01
   1   4  -5    9.12    0.40
  -1  -4   5    9.34    0.89
  -1  -4   5   10.43    1.04
   0   4  -5   26.77    0.90
   0   4  -5   24.53    1.35
   0  -4   5   27.16    1.37
   0  -4   5   26.62    1.19
  -1   4  -5   14.61    0.80
  -1   4  -5   14.01    1.07
   1  -4   5   15.08    0.87
  -2   4  -5    7.31    0.75
  -2   4  -5    5.58    0.80
   2  -4   5    7.33    0.66
   2  -4   5    5.71    0.81
  -3   4  -5    9.07    0.90
  -3   4  -5    7.95    0.99
   3  -4   5    8.84    1.11
   3  -4   5    8.30    0.59
  -4   4  -5    9.16    1.04
  -4   4  -5   11.08    1.08
   4  -4   5   12.46    1.24
  -5   4  -5    9.95    1.12
  -5   4  -5    9.19    1.09
   5  -4   5    8.10    1.11
  -6   4  -5   13.69    1.34
  -6   4  -5   16.41    1.33
   6  -4   5   15.94    1.57
  -7   4  -5   25.72    1.64
  -7   4  -5   22.37    1.65
   7  -4   5   22.24    1.68
  -8   4  -5   36.37    1.98
  -8   4  -5   39.78    2.20
   8  -4   5   34.80    2.11
  -9   4  -5   21.58    2.03
  -9   4  -5   22.04    1.64
   9  -4   5   24.68    1.89
 -10   4  -5    4.21    1.10
 -10   4  -5    2.73    0.84
  10  -4   5    7.78    1.34
 -11   4  -5    4.19    1.20
  11  -4   5    3.36    1.07
  13   3  -5   24.49    2.37
 -13  -3   5   21.00    2.12
  12   3  -5    1.95    0.94
 -12  -3   5    2.87    1.04
  11   3  -5    2.73    0.96
 -11  -3   5    1.37    0.81
  10   3  -5    2.10    0.85
 -10  -3   5    1.18    0.80
   9   3  -5    5.87    0.86
   9   3  -5    4.68    0.96
  -9  -3   5    5.23    1.02
   8   3  -5   15.58    1.50
   8   3  -5   15.88    1.15
  -8  -3   5   16.23    1.59
   7   3  -5    1.16    0.48
   7   3  -5    0.47    0.52
  -7  -3   5    0.40    0.53
   6   3  -5   13.99    1.29
   6   3  -5   13.74    1.00
  -6  -3   5   13.66    1.33
  -6  -3   5   11.40    0.71
   5   3  -5   19.63    1.20
   5   3  -5   18.59    1.12
   5   3  -5   18.72    1.23
  -5  -3   5   18.43    0.65
  -5  -3   5   17.57    1.25
   4   3  -5    5.52    0.75
  -4  -3   5    7.05    0.89
   3   3  -5    1.74    0.51
  -3  -3   5    2.39    0.54
  -3  -3   5    1.31    0.51
   2   3  -5    8.63    0.89
  -2  -3   5    8.27    0.84
  -2  -3   5    6.55    0.80
   1   3  -5   28.42    1.35
  -1  -3   5   30.21    1.28
  -1  -3   5   27.21    1.31
   0   3  -5    1.57    0.27
   0   3  -5    1.06    0.43
   0  -3   5    0.57    0.37
   0  -3   5    1.10    0.45
  -1   3  -5    8.74    0.60
  -1   3  -5    7.80    0.84
   1  -3   5    8.54    0.68
   1  -3   5    9.02    0.93
  -2   3  -5    4.08    0.53
  -2   3  -5    2.26    0.57
   2  -3   5    3.45    0.67
   2  -3   5    4.34    0.52
  -3   3  -5   32.69    1.50
  -3   3  -5   31.33    1.32
   3  -3   5   29.39    1.46
   3  -3   5   30.29    1.03
  -4   3  -5   -0.17    0.40
  -4   3  -5    0.36    0.41
   4  -3   5    0.34    0.23
   4  -3   5    0.32    0.45
  -5   3  -5    0.59    0.50
  -5   3  -5   -0.03    0.41
   5  -3   5    0.22    0.49
  -6   3  -5    5.00    0.83
  -6   3  -5    5.94    0.93
   6  -3   5    4.62    0.84
  -7   3  -5    4.94    0.91
  -7   3  -5    5.57    0.86
   7  -3   5    3.94    0.84
  -8   3  -5   14.99    1.57
  -8   3  -5   12.47    1.28
   8  -3   5   13.01    1.49
  -9   3  -5    8.33    1.09
  -9   3  -5    7.09    1.17
   9  -3   5    6.68    1.14
 -10   3  -5    3.25    0.98
 -10   3  -5    3.00    0.77
  10  -3   5    3.04    1.00
 -11   3  -5   -0.62    0.68
  11  -3   5   -0.72    0.62
 -12   3  -5   17.26    2.13
  12  -3   5   11.71    1.73
  13   2  -5   -0.82    0.82
 -13  -2   5   -0.24    0.78
  12   2  -5   10.38    1.56
 -12  -2   5   10.45    1.55
  11   2  -5   23.13    1.85
 -11  -2   5   22.40    1.84
  10   2  -5   13.59    1.51
 -10  -2   5   17.19    1.72
   9   2  -5    8.60    1.19
   9   2  -5    8.14    0.99
  -9  -2   5    7.67    1.13
   8   2  -5    3.07    0.66
   8   2  -5    1.38    0.63
  -8  -2   5    2.71    0.60
  -8  -2   5    2.64    0.78
   7   2  -5    7.86    1.07
   7   2  -5    7.97    0.94
  -7  -2   5    6.46    0.72
  -7  -2   5    8.36    1.08
   6   2  -5    8.46    0.90
   6   2  -5    8.66    0.97
  -6  -2   5    8.45    1.07
  -6  -2   5    8.87    0.74
   5   2  -5    4.77    0.75
   5   2  -5    5.54    0.73
   5   2  -5    5.40    0.74
  -5  -2   5    5.62    0.85
  -5  -2   5    5.16    0.50
   4   2  -5    4.52    0.69
   4   2  -5    3.51    0.61
   4   2  -5    3.62    0.61
  -4  -2   5    4.19    0.38
  -4  -2   5    4.73    0.75
   3   2  -5    0.42    0.40
  -3  -2   5    0.40    0.38
  -3  -2   5    0.06    0.38
   2   2  -5    7.83    0.80
  -2  -2   5    8.23    0.82
  -2  -2   5    9.66    0.88
   1   2  -5    6.34    0.72
  -1  -2   5    7.86    0.77
  -1  -2   5    6.42    0.72
   0   2  -5   95.71    1.78
   0   2  -5   94.81    2.51
   0  -2   5   94.34    2.40
   0  -2   5   94.15    2.34
  -1   2  -5    9.84    0.90
  -1   2  -5    9.24    0.56
   1  -2   5    6.92    0.72
   1  -2   5    8.44    0.67
  -2   2  -5    7.03    0.64
  -2   2  -5    6.96    0.76
   2  -2   5    6.74    0.61
   2  -2   5    7.58    0.83
  -3   2  -5   24.74    1.11
  -3   2  -5   22.86    1.18
   3  -2   5   23.98    1.22
   3  -2   5   23.89    0.92
  -4   2  -5   18.68    1.07
  -4   2  -5   17.47    1.07
   4  -2   5   18.11    0.75
   4  -2   5   17.78    1.12
  -5   2  -5   24.43    1.29
  -5   2  -5   22.91    1.28
   5  -2   5   22.15    0.81
   5  -2   5   23.91    1.37
  -6   2  -5   22.39    1.37
  -6   2  -5   20.81    1.23
   6  -2   5   21.19    0.77
   6  -2   5   18.36    1.31
  -7   2  -5   -0.01    0.53
  -7   2  -5    0.60    0.44
   7  -2   5    0.79    0.50
  -8   2  -5    8.01    1.15
  -8   2  -5    7.90    0.98
   8  -2   5   11.72    1.34
  -9   2  -5   22.76    1.42
  -9   2  -5   23.44    1.75
   9  -2   5   22.98    1.68
 -10   2  -5    5.51    1.13
 -10   2  -5    7.56    1.02
  10  -2   5    5.83    1.11
 -11   2  -5    1.42    0.88
  11  -2   5    3.31    1.02
 -12   2  -5    2.54    1.10
  12  -2   5    1.82    0.89
 -13   2  -5    2.63    1.16
  13  -2   5    3.55    1.15
  13   1  -5    1.20    1.02
 -13  -1   5    1.85    0.99
  12   1  -5    2.08    0.98
 -12  -1   5    0.14    0.74
  11   1  -5    3.28    1.00
 -11  -1   5    4.53    1.02
  10   1  -5    9.16    1.13
  10   1  -5    8.81    1.25
 -10  -1   5   10.04    1.33
 -10  -1   5    8.18    1.09
   9   1  -5   18.98    1.49
   9   1  -5   18.07    1.26
  -9  -1   5   16.31    1.57
  -9  -1   5   18.08    1.32
   8   1  -5   19.69    1.26
   8   1  -5   20.58    1.44
  -8  -1   5   16.84    1.22
  -8  -1   5   19.88    1.45
   7   1  -5    0.19    0.39
   7   1  -5    0.83    0.55
  -7  -1   5    0.49    0.45
  -7  -1   5    0.18    0.49
   6   1  -5    5.58    0.81
   6   1  -5    5.89    0.79
  -6  -1   5    5.55    0.68
  -6  -1   5    5.53    0.85
   5   1  -5   23.53    1.22
   5   1  -5   22.33    1.20
  -5  -1   5   21.79    1.31
  -5  -1   5   23.27    1.00
   4   1  -5    1.91    0.48
   4   1  -5    1.38    0.47
   4   1  -5    1.70    0.46
  -4  -1   5    1.64    0.35
  -4  -1   5    1.42    0.49
   3   1  -5    8.38    0.76
   3   1  -5   10.13    0.78
   3   1  -5    9.04    0.83
  -3  -1   5    9.87    0.95
  -3  -1   5    8.57    0.49
   2   1  -5    2.46    0.50
  -2  -1   5    3.68    0.54
  -2  -1   5    2.91    0.55
  -2  -1   5    2.87    0.27
   1   1  -5    9.28    0.34
   1   1  -5    9.58    0.78
  -1  -1   5    7.69    0.74
  -1  -1   5   11.48    0.73
   0   1  -5    2.38    0.27
   0   1  -5    1.51    0.45
   0  -1   5    1.60    0.44
   0  -1   5    2.01    0.42
  -1   1  -5    3.62    0.55
  -1   1  -5    5.27    0.46
   1  -1   5    3.86    0.55
   1  -1   5    4.28    0.54
  -2   1  -5    6.89    0.76
  -2   1  -5    7.89    0.62
   2  -1   5    9.37    0.82
   2  -1   5    8.29    0.63
  -3   1  -5   -0.23    0.28
  -3   1  -5   -0.07    0.31
   3  -1   5    0.08    0.27
   3  -1   5   -0.23    0.32
  -4   1  -5    8.54    0.81
  -4   1  -5   10.12    0.92
   4  -1   5    8.31    0.60
   4  -1   5    8.87    0.90
  -5   1  -5    2.37    0.56
  -5   1  -5    1.54    0.45
   5  -1   5    2.92    0.42
   5  -1   5    2.93    0.63
  -6   1  -5    9.28    1.02
  -6   1  -5    9.08    0.90
   6  -1   5    9.44    0.61
   6  -1   5    8.59    0.98
  -7   1  -5   35.57    1.50
  -7   1  -5   37.28    1.80
   7  -1   5   35.03    1.18
   7  -1   5   38.08    1.77
  -8   1  -5    3.46    0.64
  -8   1  -5    4.46    0.92
   8  -1   5    2.30    0.68
  -9   1  -5   -0.25    0.53
  -9   1  -5    0.10    0.40
   9  -1   5   -0.06    0.50
 -10   1  -5   11.03    1.41
  10  -1   5    9.36    1.34
 -11   1  -5    9.50    1.40
  11  -1   5   11.14    1.49
 -12   1  -5    4.76    1.25
  12  -1   5    3.63    1.07
 -13   1  -5    0.45    0.79
  13  -1   5   -0.08    0.69
  12   0  -5   13.11    1.70
 -12   0   5    8.75    1.36
  11   0  -5    2.57    0.99
 -11   0   5    4.24    0.98
 -11   0   5    4.03    1.00
  10   0  -5    2.45    0.71
  10   0  -5    3.97    0.99
 -10   0   5    3.42    0.87
 -10   0   5    2.59    0.83
   9   0  -5    8.94    1.21
   9   0  -5   10.20    1.14
  -9   0   5    9.04    1.20
  -9   0   5    9.08    1.15
   8   0  -5    3.15    0.70
   8   0  -5    3.93    0.85
  -8   0   5    2.38    0.72
  -8   0   5    3.15    0.75
   7   0  -5   32.28    1.54
   7   0  -5   31.81    1.62
  -7   0   5   35.93    1.60
  -7   0   5   34.84    1.71
   6   0  -5    0.59    0.42
   6   0  -5   -0.11    0.35
  -6   0   5    0.07    0.41
  -6   0   5   -0.17    0.38
   5   0  -5   -0.08    0.33
   5   0  -5    0.32    0.39
  -5   0   5    0.61    0.37
  -5   0   5    0.30    0.44
   4   0  -5   28.62    1.31
   4   0  -5   31.32    1.28
  -4   0   5   30.34    1.13
  -4   0   5   29.02    1.38
   3   0  -5  207.70    4.11
   3   0  -5  214.31    4.03
   3   0  -5  216.05    4.32
  -3   0   5  216.78    3.88
  -3   0   5  207.23    4.36
   2   0  -5   89.11    2.30
  -2   0   5   88.88    1.84
  -2   0   5   90.34    2.38
   1   0  -5    5.70    0.69
   1   0  -5    4.27    0.35
  -1   0   5    4.16    0.61
  -1   0   5    4.68    0.51
   0   0  -5    0.28    0.19
   0   0  -5   -0.45    0.27
   0   0   5   -0.12    0.32
   0   0   5   -0.02    0.25
  -1   0  -5    3.93    0.54
  -1   0  -5    4.55    0.43
   1   0   5    4.73    0.59
   1   0   5    3.27    0.45
  -2   0  -5  173.40    3.52
  -2   0  -5  173.40    3.33
   2   0   5  184.01    3.49
   2   0   5  172.03    3.43
  -3   0  -5    6.13    0.63
  -3   0  -5    6.22    0.65
   3   0   5    6.73    0.61
   3   0   5    6.58    0.71
  -4   0  -5   14.43    0.84
  -4   0  -5   14.12    0.89
   4   0   5   15.21    0.79
   4   0   5   14.27    0.93
  -5   0  -5    0.44    0.31
  -5   0  -5    0.86    0.45
   5   0   5    0.22    0.38
   5   0   5    0.42    0.29
  -6   0  -5   26.98    1.35
  -6   0  -5   27.26    1.16
   6   0   5   27.58    1.06
   6   0   5   26.78    1.39
  -7   0  -5   37.49    1.73
  -7   0  -5   37.94    1.42
   7   0   5   35.42    1.26
   7   0   5   37.45    1.73
  -8   0  -5   19.21    1.06
  -8   0  -5   17.88    1.30
   8   0   5   22.55    1.03
   8   0   5   19.38    1.38
  -9   0  -5   21.17    1.54
  -9   0  -5   20.63    1.15
   9   0   5   20.08    1.49
 -10   0  -5    1.60    0.78
  10   0   5    1.03    0.68
 -11   0  -5    2.06    0.88
  11   0   5    3.47    0.98
 -12   0  -5    5.85    1.28
  12   0   5    4.41    1.16
 -13   0  -5    7.62    1.41
  13   0   5    8.34    1.46
 -14   0  -5   23.19    2.43
  14   0   5   15.63    1.94
  12  -1  -5    5.88    1.27
 -12   1   5    6.47    1.32
  11  -1  -5    5.79    1.19
 -11   1   5    5.01    1.03
 -11   1   5    9.56    1.43
  10  -1  -5   16.43    1.68
  10  -1  -5   18.40    1.42
 -10   1   5   16.82    1.62
 -10   1   5   15.02    1.63
   9  -1  -5   11.36    1.34
   9  -1  -5   11.00    1.19
  -9   1   5   11.86    1.30
  -9   1   5   11.55    1.36
   8  -1  -5    0.92    0.51
   8  -1  -5    1.31    0.68
  -8   1   5   -0.47    0.47
  -8   1   5    1.42    0.70
   7  -1  -5    8.87    1.00
   7  -1  -5   11.74    1.23
  -7   1   5   12.03    1.18
  -7   1   5   12.47    1.22
   6  -1  -5   16.62    1.14
   6  -1  -5   20.38    1.23
  -6   1   5   18.01    1.24
  -6   1   5   17.35    1.15
   5  -1  -5    8.05    0.82
   5  -1  -5    7.94    0.86
  -5   1   5    8.51    0.91
  -5   1   5    9.09    0.88
   4  -1  -5    1.00    0.40
   4  -1  -5    0.60    0.35
  -4   1   5   -0.03    0.34
  -4   1   5    0.68    0.40
   3  -1  -5   33.43    1.18
   3  -1  -5   33.72    1.37
  -3   1   5   33.14    1.20
  -3   1   5   31.92    1.37
   2  -1  -5   33.25    1.30
   2  -1  -5   33.29    1.07
  -2   1   5   32.80    1.09
  -2   1   5   31.66    1.32
   1  -1  -5   28.81    0.92
   1  -1  -5   27.18    1.17
  -1   1   5   29.41    1.19
  -1   1   5   27.93    0.91
   0  -1  -5    3.46    0.39
   0  -1  -5    1.88    0.43
   0   1   5    2.72    0.35
   0   1   5    2.19    0.48
  -1  -1  -5   21.53    0.81
  -1  -1  -5   21.41    0.97
   1   1   5   23.30    1.03
   1   1   5   21.12    0.78
  -2  -1  -5   26.95    1.03
  -2  -1  -5   23.40    0.92
   2   1   5   24.91    0.91
   2   1   5   25.38    1.04
  -3  -1  -5   68.70    1.73
  -3  -1  -5   66.99    1.78
   3   1   5   66.83    1.74
   3   1   5   68.04    1.79
  -4  -1  -5   14.44    0.90
  -4  -1  -5   15.24    0.78
   4   1   5   14.94    0.82
   4   1   5   15.43    0.90
  -5  -1  -5    4.35    0.52
  -5  -1  -5    5.16    0.73
   5   1   5    4.32    0.64
   5   1   5    4.42    0.56
  -6  -1  -5    6.74    0.61
  -6  -1  -5    6.27    0.85
   6   1   5    6.09    0.63
   6   1   5    5.54    0.78
  -7  -1  -5    6.16    0.61
  -7  -1  -5    5.13    0.78
   7   1   5    6.47    0.69
   7   1   5    6.53    0.87
  -8  -1  -5    0.29    0.44
  -8  -1  -5    0.35    0.29
   8   1   5   -0.01    0.45
   8   1   5    0.48    0.37
  -9  -1  -5   15.49    1.50
  -9  -1  -5   13.51    0.85
   9   1   5   13.87    0.95
   9   1   5   11.85    1.26
 -10  -1  -5   20.08    1.57
  10   1   5   18.63    1.14
  10   1   5   20.88    1.57
 -11  -1  -5   13.39    1.62
  11   1   5   14.33    1.64
 -12  -1  -5    8.18    1.31
  12   1   5    9.33    1.35
 -13  -1  -5    1.53    0.88
  13   1   5    2.05    0.95
 -14  -1  -5   14.29    1.86
  14   1   5   12.07    1.83
  12  -2  -5    6.43    1.33
 -12   2   5    5.89    1.38
  11  -2  -5    6.26    1.23
 -11   2   5    4.01    1.11
  10  -2  -5   33.55    2.03
  10  -2  -5   35.42    1.98
 -10   2   5   34.05    2.18
   9  -2  -5   25.61    1.64
   9  -2  -5   29.04    1.83
  -9   2   5   31.23    1.92
  -9   2   5   25.40    1.62
   8  -2  -5   18.04    1.35
   8  -2  -5   18.03    1.41
  -8   2   5   19.23    1.34
  -8   2   5   20.69    1.55
   7  -2  -5    1.58    0.58
   7  -2  -5    1.37    0.63
  -7   2   5    1.36    0.52
  -7   2   5    2.49    0.73
   6  -2  -5   10.92    1.07
   6  -2  -5   10.94    1.07
  -6   2   5   12.87    1.13
  -6   2   5   10.49    1.06
   5  -2  -5    6.97    0.85
   5  -2  -5    7.78    0.81
  -5   2   5    5.99    0.78
  -5   2   5    7.07    0.86
   4  -2  -5   97.29    2.66
   4  -2  -5  100.57    2.42
  -4   2   5   97.45    2.59
  -4   2   5   99.25    2.62
   3  -2  -5   10.16    0.90
   3  -2  -5    9.33    0.66
  -3   2   5   10.36    0.82
  -3   2   5    9.61    0.78
   2  -2  -5   21.34    0.81
   2  -2  -5   21.53    1.10
  -2   2   5   21.64    0.99
  -2   2   5   21.55    1.07
   1  -2  -5   71.08    1.48
   1  -2  -5   71.05    1.78
   1  -2  -5   72.47    1.98
  -1   2   5   69.98    1.95
   0  -2  -5    9.31    0.78
   0  -2  -5    8.88    0.60
   0   2   5    9.72    0.82
   0   2   5    9.15    0.41
  -1  -2  -5  124.18    2.69
  -1  -2  -5  127.63    2.60
   1   2   5  126.90    2.77
   1   2   5  127.70    2.23
  -2  -2  -5   27.32    1.00
  -2  -2  -5   27.56    1.03
   2   2   5   27.10    1.11
   2   2   5   27.84    0.84
  -3  -2  -5   28.98    1.12
  -3  -2  -5   28.13    0.99
   3   2   5   27.90    1.13
   3   2   5   28.65    0.99
  -4  -2  -5   37.73    1.36
  -4  -2  -5   35.04    1.08
   4   2   5   35.49    1.22
   4   2   5   34.05    1.26
  -5  -2  -5   36.08    1.42
  -5  -2  -5   33.93    1.05
   5   2   5   33.70    1.32
   5   2   5   37.50    1.32
  -6  -2  -5   46.21    1.76
  -6  -2  -5   48.06    1.28
   6   2   5   46.28    1.69
   6   2   5   46.45    1.55
  -7  -2  -5   -0.27    0.34
  -7  -2  -5    0.03    0.22
   7   2   5   -0.24    0.29
   7   2   5    0.17    0.41
  -8  -2  -5    1.45    0.59
  -8  -2  -5    1.09    0.30
   8   2   5    0.84    0.47
   8   2   5    0.27    0.37
  -9  -2  -5    6.00    0.95
   9   2   5    4.01    0.67
   9   2   5    4.69    0.90
 -10  -2  -5   23.25    1.62
  10   2   5   24.14    1.66
 -11  -2  -5   13.19    1.47
  11   2   5   12.12    1.47
 -12  -2  -5    3.72    1.03
  12   2   5    5.70    1.23
 -13  -2  -5    8.54    1.38
  13   2   5    9.06    1.47
 -14  -2  -5    6.12    1.41
  14   2   5    6.13    1.27
 -15  -2  -5    3.31    1.15
  15   2   5    3.30    1.16
  11  -3  -5    1.07    0.81
 -11   3   5    1.24    1.00
  10  -3  -5   -0.29    0.69
  10  -3  -5    0.02    0.51
 -10   3   5   -0.94    0.72
   9  -3  -5   18.19    1.62
   9  -3  -5   18.58    1.66
  -9   3   5   19.26    1.81
   8  -3  -5   39.72    1.96
   8  -3  -5   46.51    2.14
  -8   3   5   39.43    1.81
  -8   3   5   42.60    2.18
   7  -3  -5   36.94    1.74
   7  -3  -5   30.68    1.69
  -7   3   5   38.54    1.70
  -7   3   5   32.60    1.83
   6  -3  -5   13.89    1.07
   6  -3  -5   13.76    1.12
  -6   3   5   13.06    1.03
  -6   3   5   16.59    1.28
   5  -3  -5   29.19    1.32
   5  -3  -5   31.23    1.53
  -5   3   5   31.21    1.41
  -5   3   5   29.88    1.53
   4  -3  -5   62.87    1.83
   4  -3  -5   67.77    2.18
  -4   3   5   65.74    2.16
  -4   3   5   67.00    2.05
   3  -3  -5    4.89    0.70
   3  -3  -5    5.97    0.58
  -3   3   5    5.74    0.69
  -3   3   5    5.73    0.73
   2  -3  -5   42.65    1.56
   2  -3  -5   42.66    1.14
  -2   3   5   44.91    1.54
  -2   3   5   37.69    1.44
   1  -3  -5   47.06    1.57
   1  -3  -5   44.35    0.99
  -1   3   5   42.87    1.49
   0  -3  -5    0.31    0.33
   0  -3  -5    0.30    0.30
   0   3   5    0.54    0.37
  -1  -3  -5   54.37    1.54
  -1  -3  -5   53.50    1.57
   1   3   5   52.54    1.61
  -2  -3  -5    0.56    0.30
  -2  -3  -5    1.16    0.35
   2   3   5    1.03    0.40
   2   3   5    0.95    0.22
  -3  -3  -5  242.69    4.62
  -3  -3  -5  249.70    4.31
   3   3   5  242.59    4.66
   3   3   5  248.82    4.24
  -4  -3  -5   85.13    2.22
  -4  -3  -5   86.78    1.83
   4   3   5   83.76    1.98
   4   3   5   82.74    2.18
  -5  -3  -5    6.57    0.44
  -5  -3  -5    6.96    0.77
   5   3   5    6.77    0.70
   5   3   5    6.03    0.65
  -6  -3  -5    8.66    0.47
  -6  -3  -5    7.79    0.83
   6   3   5    7.72    0.80
   6   3   5   10.49    0.96
  -7  -3  -5   27.48    0.78
  -7  -3  -5   25.14    1.39
   7   3   5   28.57    1.38
   7   3   5   28.06    1.28
  -8  -3  -5   73.86    1.48
  -8  -3  -5   73.88    2.48
   8   3   5   70.92    2.40
  -9  -3  -5    7.87    0.90
  -9  -3  -5    6.75    0.95
   9   3   5    8.40    1.11
 -10  -3  -5   12.71    1.15
 -10  -3  -5   12.19    1.33
  10   3   5   11.64    1.33
 -11  -3  -5    9.81    1.12
 -11  -3  -5   10.58    1.37
  11   3   5    8.58    1.23
 -12  -3  -5    7.41    1.28
 -12  -3  -5    7.08    0.99
  12   3   5    7.58    1.18
 -13  -3  -5   22.62    2.10
  13   3   5   27.76    2.08
 -14  -3  -5    1.91    0.97
  14   3   5    1.46    0.95
 -15  -3  -5   -0.51    0.75
  15   3   5   -0.07    0.86
  11  -4  -5    9.76    1.43
 -11   4   5   10.70    1.74
  10  -4  -5   10.88    1.43
  10  -4  -5   11.42    1.52
 -10   4   5    9.86    1.55
   9  -4  -5   -1.00    0.49
   9  -4  -5    1.65    0.69
  -9   4   5    0.51    0.76
   8  -4  -5    1.69    0.68
   8  -4  -5    2.29    0.72
  -8   4   5    2.07    0.86
   7  -4  -5   17.24    1.28
   7  -4  -5   12.61    1.33
  -7   4   5   14.75    1.53
  -7   4   5   15.71    1.15
   6  -4  -5    0.46    0.46
   6  -4  -5    0.35    0.49
  -6   4   5    0.94    0.47
  -6   4   5    1.30    0.61
   5  -4  -5   27.46    1.27
   5  -4  -5   26.94    1.48
  -5   4   5   24.38    1.24
  -5   4   5   26.91    1.54
   4  -4  -5    7.19    0.71
   4  -4  -5    6.85    0.88
  -4   4   5    5.60    0.81
  -4   4   5    6.58    0.74
   3  -4  -5   53.34    1.50
   3  -4  -5   54.90    1.95
  -3   4   5   56.21    1.76
  -3   4   5   51.74    1.91
   2  -4  -5   87.01    2.41
   2  -4  -5   79.47    1.77
  -2   4   5   83.36    2.21
  -2   4   5   82.62    2.38
   1  -4  -5  118.29    2.11
   1  -4  -5  116.92    2.87
  -1   4   5  120.24    2.75
  -1   4   5  118.70    2.87
   0  -4  -5   74.95    2.08
   0  -4  -5   78.80    2.10
   0   4   5   79.38    2.09
  -1  -4  -5    9.30    0.75
  -1  -4  -5    9.42    0.74
   1   4   5    9.25    0.74
  -2  -4  -5    9.09    0.73
  -2  -4  -5    8.11    0.65
   2   4   5    8.79    0.36
   2   4   5    9.72    0.85
  -3  -4  -5    8.10    0.60
  -3  -4  -5    9.97    0.78
   3   4   5    9.18    0.51
   3   4   5    8.88    0.81
  -4  -4  -5   69.46    1.99
  -4  -4  -5   67.43    1.55
   4   4   5   69.30    1.99
   4   4   5   64.57    1.65
  -5  -4  -5   48.55    1.65
  -5  -4  -5   46.53    1.12
   5   4   5   45.22    1.47
   5   4   5   46.82    1.65
  -6  -4  -5   17.91    0.56
  -6  -4  -5   17.98    1.12
   6   4   5   17.30    1.01
   6   4   5   17.06    1.04
  -7  -4  -5    0.56    0.36
  -7  -4  -5    0.18    0.40
   7   4   5    0.64    0.44
  -8  -4  -5   44.07    1.87
  -8  -4  -5   43.33    1.71
   8   4   5   41.85    1.78
  -9  -4  -5   38.82    1.85
  -9  -4  -5   35.80    1.64
   9   4   5   40.70    1.86
 -10  -4  -5   22.61    1.54
 -10  -4  -5   20.88    1.33
  10   4   5   19.91    1.47
 -11  -4  -5    2.10    0.65
 -11  -4  -5    4.61    0.98
  11   4   5    2.03    0.77
 -12  -4  -5    0.96    0.72
 -12  -4  -5    0.79    0.56
  12   4   5    0.41    0.66
 -13  -4  -5    8.78    1.38
 -13  -4  -5    7.77    1.12
  13   4   5    6.09    1.20
 -14  -4  -5    2.56    0.98
  14   4   5    3.28    1.07
 -15  -4  -5    0.31    0.82
  15   4   5   -0.10    0.80
 -11   5   5    0.49    0.88
  10  -5  -5    9.78    1.36
 -10   5   5   12.48    1.75
   9  -5  -5   24.42    1.82
  -9   5   5   20.27    1.96
   8  -5  -5   14.86    1.41
   8  -5  -5   12.72    1.49
  -8   5   5   12.52    1.55
   7  -5  -5    3.97    0.92
   7  -5  -5    2.36    0.70
  -7   5   5    1.55    0.79
   6  -5  -5    1.92    0.61
   6  -5  -5    2.97    0.76
  -6   5   5    2.53    0.81
  -6   5   5    2.60    0.59
   5  -5  -5   36.32    1.83
   5  -5  -5   35.61    1.50
  -5   5   5   37.57    1.51
  -5   5   5   37.25    1.92
   4  -5  -5   69.57    2.42
   4  -5  -5   65.35    1.91
  -4   5   5   64.68    2.39
  -4   5   5   66.38    2.01
   3  -5  -5   28.42    1.46
   3  -5  -5   27.71    1.08
  -3   5   5   28.38    1.26
  -3   5   5   29.49    1.53
   2  -5  -5   10.26    0.61
   2  -5  -5    9.09    0.92
  -2   5   5    9.83    0.78
  -2   5   5   10.37    1.07
   1  -5  -5    6.79    0.81
   1  -5  -5    5.73    0.42
  -1   5   5    5.13    0.74
  -1   5   5    6.67    0.72
   0  -5  -5  219.44    3.48
   0  -5  -5  213.36    4.43
   0  -5  -5  210.19    4.37
   0   5   5  215.89    4.27
  -1  -5  -5   37.47    1.40
  -1  -5  -5   40.45    1.47
   1   5   5   39.29    0.79
   1   5   5   38.77    1.41
  -2  -5  -5  131.76    2.85
  -2  -5  -5  127.89    3.02
   2   5   5  135.07    2.30
   2   5   5  129.40    3.00
  -3  -5  -5    5.54    0.68
  -3  -5  -5    5.62    0.58
   3   5   5    5.12    0.68
   3   5   5    5.75    0.44
  -4  -5  -5   53.55    1.77
  -4  -5  -5   52.41    1.40
   4   5   5   52.54    1.42
   4   5   5   54.47    1.81
  -5  -5  -5  130.90    2.43
  -5  -5  -5  127.23    3.11
   5   5   5  127.90    3.16
   5   5   5  128.54    2.81
  -6  -5  -5   47.55    1.78
  -6  -5  -5   50.75    1.08
   6   5   5   51.25    1.67
  -7  -5  -5   55.27    2.02
  -7  -5  -5   54.74    1.96
   7   5   5   55.65    1.90
  -8  -5  -5    0.10    0.40
  -8  -5  -5    0.59    0.43
   8   5   5    0.12    0.40
  -9  -5  -5   12.90    1.31
  -9  -5  -5   13.09    1.06
   9   5   5   10.54    1.14
 -10  -5  -5   14.96    1.22
 -10  -5  -5   16.59    1.34
  10   5   5   18.52    1.43
 -11  -5  -5   18.23    1.49
 -11  -5  -5   19.86    1.41
  11   5   5   20.05    1.56
 -12  -5  -5   44.80    2.14
 -12  -5  -5   42.48    2.25
  12   5   5   45.23    2.37
 -13  -5  -5    2.02    0.86
 -13  -5  -5    1.64    0.69
  13   5   5    0.57    0.80
 -14  -5  -5    0.38    0.62
 -14  -5  -5    0.09    0.70
  14   5   5    0.44    0.81
 -15  -5  -5   10.17    1.63
  15   5   5    9.25    1.60
  10  -6  -5    0.19    0.71
 -10   6   5   -0.13    0.86
   9  -6  -5    1.73    0.80
  -9   6   5    0.14    0.79
   8  -6  -5   15.03    1.66
  -8   6   5   17.19    1.90
   7  -6  -5   25.47    1.79
  -7   6   5   27.52    1.96
   6  -6  -5   17.53    1.19
   6  -6  -5   15.45    1.56
  -6   6   5   16.15    1.63
   5  -6  -5    0.61    0.44
   5  -6  -5    1.70    0.67
  -5   6   5    1.62    0.68
  -5   6   5    1.48    0.49
   4  -6  -5   -0.13    0.34
   4  -6  -5   -0.27    0.44
  -4   6   5   -0.09    0.36
  -4   6   5    0.91    0.64
   3  -6  -5   25.41    1.08
   3  -6  -5   22.88    1.40
  -3   6   5   26.24    1.20
  -3   6   5   26.38    1.56
   2  -6  -5   28.84    1.51
   2  -6  -5   31.07    1.09
  -2   6   5   30.17    1.27
  -2   6   5   31.34    1.58
   1  -6  -5   17.71    1.16
   1  -6  -5   18.56    0.75
  -1   6   5   17.47    1.20
  -1   6   5   18.64    0.99
   0  -6  -5    4.69    0.40
   0  -6  -5    6.27    0.84
   0  -6  -5    5.43    0.72
   0   6   5    4.89    0.62
  -1  -6  -5   13.13    0.91
  -1  -6  -5   14.16    0.57
  -1  -6  -5   14.85    1.01
   1   6   5   13.47    0.90
  -2  -6  -5   66.18    2.08
  -2  -6  -5   65.70    1.94
   2   6   5   66.57    2.01
   2   6   5   68.04    1.41
   2   6   5   68.83    1.47
  -3  -6  -5   31.76    1.22
  -3  -6  -5   32.83    1.39
   3   6   5   33.01    1.40
   3   6   5   31.42    0.98
  -4  -6  -5   16.68    1.04
  -4  -6  -5   15.92    0.79
   4   6   5   17.88    1.10
   4   6   5   15.64    0.78
  -5  -6  -5    0.13    0.37
  -5  -6  -5    0.53    0.26
   5   6   5    0.21    0.38
   5   6   5   -0.20    0.25
  -6  -6  -5    0.69    0.24
  -6  -6  -5    0.56    0.42
  -6  -6  -5    0.55    0.41
   6   6   5    1.33    0.42
  -7  -6  -5   14.52    1.09
  -7  -6  -5   14.01    1.03
   7   6   5   14.26    1.01
  -8  -6  -5    0.56    0.48
  -8  -6  -5    0.34    0.46
   8   6   5    0.15    0.45
  -9  -6  -5   58.44    2.29
  -9  -6  -5   55.37    2.21
   9   6   5   57.50    2.22
 -10  -6  -5   19.33    1.44
 -10  -6  -5   15.83    1.48
  10   6   5   17.37    1.40
 -11  -6  -5   -0.57    0.49
 -11  -6  -5   -0.54    0.48
  11   6   5    0.10    0.61
 -12  -6  -5   12.06    1.40
 -12  -6  -5   11.87    1.48
  12   6   5    8.98    1.37
 -13  -6  -5   17.60    1.87
 -13  -6  -5   15.81    1.63
  13   6   5   16.98    1.82
 -14  -6  -5   11.40    1.59
 -14  -6  -5   10.86    1.41
  14   6   5    8.40    1.39
 -15  -6  -5   -0.27    0.63
 -15  -6  -5    0.46    0.85
  15   6   5    0.23    0.88
   9  -7  -5    0.67    0.79
  -9   7   5    2.96    1.14
   8  -7  -5    6.38    1.22
  -8   7   5    5.90    1.31
   7  -7  -5    7.52    1.24
  -7   7   5    6.13    1.29
   6  -7  -5   40.00    2.18
  -6   7   5   38.52    2.30
   5  -7  -5   19.73    1.54
   5  -7  -5   16.13    1.22
  -5   7   5   16.71    1.69
   4  -7  -5    4.29    0.89
   4  -7  -5    4.87    0.71
  -4   7   5    4.78    0.98
   3  -7  -5    9.36    1.15
   3  -7  -5    9.13    0.85
  -3   7   5   10.66    0.84
  -3   7   5   10.56    1.23
   2  -7  -5    5.27    0.59
   2  -7  -5    5.90    0.89
  -2   7   5    5.05    0.87
  -2   7   5    6.89    0.75
   1  -7  -5   63.41    1.67
   1  -7  -5   65.35    2.29
  -1   7   5   64.57    1.92
  -1   7   5   62.69    2.33
   0  -7  -5   17.87    1.16
   0  -7  -5   17.40    0.76
   0   7   5   16.63    1.17
   0   7   5   18.33    1.02
  -1  -7  -5   39.17    1.68
  -1  -7  -5   40.45    1.16
  -1  -7  -5   39.96    1.62
   1   7   5   39.10    1.51
  -2  -7  -5    7.84    0.87
  -2  -7  -5    7.86    0.55
  -2  -7  -5    9.32    0.88
   2   7   5    8.69    0.87
  -3  -7  -5    6.58    0.71
  -3  -7  -5    4.95    0.76
   3   7   5    5.65    0.50
   3   7   5    5.36    0.76
   3   7   5    5.59    0.54
  -4  -7  -5  121.01    2.74
  -4  -7  -5  122.53    3.13
   4   7   5  122.58    3.18
   4   7   5  124.44    2.67
  -5  -7  -5    6.76    0.62
  -5  -7  -5    5.79    0.77
   5   7   5    6.87    0.86
   5   7   5    8.01    0.74
  -6  -7  -5   75.18    2.46
  -6  -7  -5   76.40    2.41
  -6  -7  -5   77.51    1.79
   6   7   5   76.49    2.18
  -7  -7  -5    8.13    0.97
  -7  -7  -5    8.80    0.49
  -7  -7  -5    8.86    1.00
   7   7   5   11.46    1.06
  -8  -7  -5   16.07    1.22
  -8  -7  -5   15.21    1.18
   8   7   5   14.40    1.08
  -9  -7  -5   39.48    1.91
  -9  -7  -5   36.71    1.82
   9   7   5   37.76    1.81
 -10  -7  -5   21.03    1.50
 -10  -7  -5   18.25    1.40
  10   7   5   16.01    1.46
 -11  -7  -5    2.85    0.82
 -11  -7  -5    2.80    0.81
  11   7   5    2.74    0.80
 -12  -7  -5    3.42    0.91
 -12  -7  -5    1.93    0.74
  12   7   5    2.40    0.92
 -13  -7  -5    1.68    0.78
 -13  -7  -5    1.10    0.76
  13   7   5    0.92    0.82
 -14  -7  -5    9.94    1.45
 -14  -7  -5    6.95    1.31
  14   7   5   10.27    1.59
 -15  -7  -5    9.45    1.51
 -15  -7  -5   10.52    1.52
  15   7   5    7.85    1.60
   8  -8  -5   16.43    1.91
  -8   8   5   12.61    1.83
   7  -8  -5    8.43    1.35
  -7   8   5    7.20    1.44
   6  -8  -5    5.38    1.15
  -6   8   5    4.73    1.17
   5  -8  -5    3.52    0.91
  -5   8   5    4.74    1.10
   4  -8  -5   30.25    1.85
  -4   8   5   29.01    1.96
   3  -8  -5   56.73    1.99
   3  -8  -5   59.57    2.48
  -3   8   5   56.07    2.52
   2  -8  -5    6.20    0.72
   2  -8  -5    6.35    0.96
  -2   8   5    6.50    0.73
  -2   8   5    7.40    1.13
   1  -8  -5    1.07    0.55
   1  -8  -5    1.17    0.40
  -1   8   5    0.96    0.40
  -1   8   5    1.27    0.62
   0  -8  -5    2.19    0.44
   0  -8  -5    2.46    0.65
   0   8   5    2.14    0.65
   0   8   5    2.32    0.53
  -1  -8  -5  164.70    4.04
  -1  -8  -5  155.15    3.82
  -1  -8  -5  161.16    3.20
   1   8   5  153.33    3.59
  -2  -8  -5   25.97    1.40
  -2  -8  -5   25.25    1.30
  -2  -8  -5   27.05    1.05
   2   8   5   26.43    1.29
  -3  -8  -5    2.70    0.63
  -3  -8  -5    2.71    0.56
   3   8   5    1.68    0.39
   3   8   5    2.12    0.55
   3   8   5    2.35    0.42
  -4  -8  -5    1.14    0.54
  -4  -8  -5    1.40    0.44
   4   8   5    1.05    0.37
   4   8   5    1.03    0.35
   4   8   5    1.55    0.54
  -5  -8  -5   11.88    0.81
  -5  -8  -5   10.23    1.03
   5   8   5   11.30    0.81
   5   8   5   12.22    1.15
  -6  -8  -5   73.51    1.88
  -6  -8  -5   71.34    2.47
  -6  -8  -5   72.38    2.41
   6   8   5   73.25    2.19
  -7  -8  -5   51.95    2.12
  -7  -8  -5   49.53    1.38
  -7  -8  -5   51.77    2.04
   7   8   5   51.05    1.86
  -8  -8  -5   29.66    1.60
  -8  -8  -5   26.72    1.57
   8   8   5   30.97    1.55
  -9  -8  -5    1.21    0.65
  -9  -8  -5    0.36    0.49
   9   8   5    1.64    0.63
 -10  -8  -5   36.05    1.99
 -10  -8  -5   35.01    1.88
  10   8   5   37.52    1.92
 -11  -8  -5   25.58    1.80
 -11  -8  -5   28.01    1.81
  11   8   5   29.92    1.86
 -12  -8  -5    9.80    1.35
 -12  -8  -5    8.43    1.28
  12   8   5    8.09    1.31
 -13  -8  -5   13.07    1.55
 -13  -8  -5    9.60    1.35
  13   8   5   11.44    1.64
 -14  -8  -5    4.07    1.13
 -14  -8  -5    2.50    0.95
  14   8   5    1.44    0.96
 -15  -8  -5    7.22    1.34
 -15  -8  -5    6.50    1.32
  15   8   5    5.21    1.32
   8  -9  -5    0.45    0.83
  -8   9   5    1.50    0.93
   7  -9  -5    5.57    1.23
  -7   9   5    4.50    1.26
   6  -9  -5   -0.50    0.66
  -6   9   5    0.31    0.87
   5  -9  -5    0.65    0.70
  -5   9   5    0.27    0.65
   4  -9  -5    3.35    0.94
  -4   9   5    1.65    0.74
   3  -9  -5    2.76    0.85
  -3   9   5    2.35    0.86
   2  -9  -5   16.33    1.58
  -2   9   5   11.31    1.39
   1  -9  -5    0.26    0.54
   1  -9  -5    0.39    0.40
  -1   9   5   -0.10    0.54
  -1   9   5    0.57    0.41
   0  -9  -5    5.18    0.66
   0  -9  -5    2.22    0.69
   0   9   5    3.90    0.65
   0   9   5    3.96    0.87
  -1  -9  -5    9.96    0.77
  -1  -9  -5    9.31    1.07
   1   9   5    8.72    1.14
   1   9   5    9.17    0.93
  -2  -9  -5   27.60    1.20
  -2  -9  -5   30.77    1.54
  -2  -9  -5   29.13    1.60
   2   9   5   28.38    1.40
  -3  -9  -5   53.22    1.70
  -3  -9  -5   51.89    1.93
  -3  -9  -5   54.33    2.12
   3   9   5   52.73    2.00
  -4  -9  -5    4.57    0.78
  -4  -9  -5    5.46    0.73
   4   9   5    5.47    0.70
   4   9   5    4.30    0.77
   4   9   5    5.26    0.66
  -5  -9  -5    4.23    0.64
  -5  -9  -5    3.29    0.71
   5   9   5    4.77    0.65
   5   9   5    3.47    0.58
   5   9   5    4.01    0.76
  -6  -9  -5    7.09    0.73
  -6  -9  -5    6.94    0.96
  -6  -9  -5    6.77    0.96
   6   9   5    5.93    0.76
  -7  -9  -5    2.63    0.48
  -7  -9  -5    2.53    0.73
  -7  -9  -5    2.10    0.62
   7   9   5    3.70    0.70
  -8  -9  -5   40.38    2.00
  -8  -9  -5   37.22    1.84
   8   9   5   39.06    1.80
  -9  -9  -5    0.63    0.58
  -9  -9  -5    0.47    0.53
   9   9   5    1.31    0.59
 -10  -9  -5    0.36    0.55
 -10  -9  -5    1.05    0.59
  10   9   5    0.99    0.65
 -11  -9  -5   23.42    1.68
 -11  -9  -5   24.24    1.81
  11   9   5   22.28    1.66
 -12  -9  -5   19.70    1.83
 -12  -9  -5   23.25    1.86
  12   9   5   20.00    1.87
 -13  -9  -5   10.62    1.50
 -13  -9  -5   11.68    1.49
  13   9   5   11.77    1.66
 -14  -9  -5    3.29    0.96
 -14  -9  -5    8.14    1.39
  14   9   5    5.45    1.34
 -15  -9  -5    0.65    0.73
 -15  -9  -5   -0.30    0.80
  15   9   5    0.68    0.90
   7 -10  -5    6.45    1.36
  -7  10   5    4.08    1.19
   6 -10  -5   10.46    1.57
  -6  10   5   11.56    1.66
   5 -10  -5   17.74    1.95
  -5  10   5   12.66    1.66
   4 -10  -5    7.74    1.33
  -4  10   5    6.60    1.31
   3 -10  -5    3.35    0.91
  -3  10   5    3.67    1.05
   2 -10  -5   12.00    1.42
  -2  10   5   10.24    1.37
   1 -10  -5    4.59    0.90
  -1  10   5    3.54    0.88
   0 -10  -5   43.72    2.10
   0  10   5   45.38    2.27
   0  10   5   43.11    1.70
  -1 -10  -5   13.93    1.34
  -1 -10  -5   13.18    0.96
   1  10   5   13.85    1.04
   1  10   5   12.37    1.40
  -2 -10  -5    1.68    0.60
  -2 -10  -5    0.86    0.43
  -2 -10  -5   -0.51    0.48
   2  10   5    0.25    0.44
  -3 -10  -5    9.86    1.12
  -3 -10  -5   11.11    0.90
  -3 -10  -5   12.12    1.19
   3  10   5   13.16    1.21
  -4 -10  -5   11.72    1.23
  -4 -10  -5   11.52    1.12
   4  10   5   11.15    0.89
   4  10   5   10.71    0.89
   4  10   5    9.40    1.09
  -5 -10  -5   54.79    2.21
  -5 -10  -5   52.97    1.94
   5  10   5   50.63    1.80
   5  10   5   48.91    1.83
   5  10   5   48.37    2.15
  -6 -10  -5    6.34    0.94
  -6 -10  -5    8.45    0.89
   6  10   5    9.62    1.04
  -7 -10  -5    0.46    0.57
  -7 -10  -5    0.09    0.52
   7  10   5    0.30    0.45
  -8 -10  -5    8.35    1.05
  -8 -10  -5    7.83    1.15
   8  10   5    7.32    0.98
  -9 -10  -5   27.58    1.82
  -9 -10  -5   30.00    1.76
   9  10   5   30.15    1.74
 -10 -10  -5   16.43    1.73
 -10 -10  -5   15.38    1.51
  10  10   5   16.53    1.60
 -11 -10  -5    1.30    0.77
 -11 -10  -5    1.68    0.76
  11  10   5    2.03    0.83
 -12 -10  -5    1.53    0.90
 -12 -10  -5    0.25    0.66
  12  10   5    2.32    0.88
 -13 -10  -5    5.42    1.26
 -13 -10  -5    3.94    1.03
  13  10   5    5.07    1.21
 -14 -10  -5   13.37    1.69
 -14 -10  -5   12.96    1.76
  14  10   5   12.58    1.77
 -15 -10  -5   22.37    2.37
 -15 -10  -5   22.86    2.14
  15  10   5   23.78    2.45
   5 -11  -5    5.66    1.20
  -5  11   5    4.23    1.25
   4 -11  -5    7.03    1.37
  -4  11   5    7.50    1.43
   3 -11  -5    5.63    1.23
  -3  11   5    4.30    1.13
   2 -11  -5   -0.05    0.61
  -2  11   5    0.02    0.72
   1 -11  -5   -0.35    0.59
  -1  11   5   -0.67    0.58
   0 -11  -5   12.31    1.42
   0  11   5   10.06    1.39
  -1 -11  -5    9.31    1.23
   1  11   5   10.47    1.05
   1  11   5    9.96    1.30
  -2 -11  -5   30.75    1.79
   2  11   5   36.37    2.01
   2  11   5   34.18    1.67
  -3 -11  -5   13.53    1.04
  -3 -11  -5   13.56    1.43
  -3 -11  -5   13.38    1.30
   3  11   5   11.08    1.20
  -4 -11  -5   -0.14    0.51
  -4 -11  -5   -0.67    0.41
   4  11   5   -0.63    0.43
  -5 -11  -5   23.21    1.55
  -5 -11  -5   22.82    1.40
   5  11   5   23.39    1.31
   5  11   5   20.38    1.49
   5  11   5   23.44    1.35
  -6 -11  -5    2.41    0.71
  -6 -11  -5    2.60    0.66
   6  11   5    3.34    0.85
   6  11   5    2.59    0.66
   6  11   5    3.75    0.72
  -7 -11  -5   36.33    1.93
  -7 -11  -5   39.36    2.08
   7  11   5   37.57    1.80
  -8 -11  -5   -0.10    0.52
  -8 -11  -5   -0.76    0.51
   8  11   5    0.42    0.54
  -9 -11  -5    3.85    0.88
  -9 -11  -5    1.91    0.81
   9  11   5    2.64    0.78
 -10 -11  -5    6.08    1.14
 -10 -11  -5    5.30    1.01
  10  11   5    6.10    1.09
 -11 -11  -5   10.89    1.51
 -11 -11  -5   10.29    1.33
  11  11   5   11.77    1.50
 -12 -11  -5   15.35    1.77
 -12 -11  -5   17.60    1.77
  12  11   5   16.29    1.77
 -13 -11  -5   -0.05    0.83
 -13 -11  -5    1.84    0.84
  13  11   5    1.31    0.93
 -14 -11  -5    0.90    0.95
 -14 -11  -5    0.13    0.72
  14  11   5   -0.75    0.80
   4 -12  -5    2.63    1.07
  -4  12   5    2.60    1.10
   3 -12  -5   23.94    2.30
  -3  12   5   17.19    2.08
   2 -12  -5    8.65    1.38
  -2  12   5    8.62    1.46
   1 -12  -5    6.65    1.28
  -1  12   5    8.38    1.45
   0 -12  -5    0.61    0.66
   0  12   5    0.90    0.78
  -1 -12  -5    3.29    0.94
   1  12   5    3.05    0.99
  -2 -12  -5   12.91    1.45
   2  12   5    8.76    1.31
   2  12   5    9.83    1.22
  -3 -12  -5    0.96    0.68
   3  12   5    2.51    0.71
   3  12   5    1.49    0.73
  -4 -12  -5    8.65    1.15
  -4 -12  -5    8.54    1.21
   4  12   5    6.80    1.04
  -5 -12  -5    2.04    0.70
  -5 -12  -5    3.48    0.85
   5  12   5    3.59    0.74
   5  12   5    4.05    0.79
   5  12   5    4.01    0.88
  -6 -12  -5   10.88    1.33
  -6 -12  -5    7.04    1.01
   6  12   5    8.75    1.04
   6  12   5    8.51    1.05
   6  12   5    9.53    1.26
  -7 -12  -5   20.59    1.62
   7  12   5   19.81    1.43
  -8 -12  -5   37.49    2.18
  -8 -12  -5   42.40    2.16
   8  12   5   39.91    2.01
  -9 -12  -5    6.65    1.25
  -9 -12  -5    5.85    1.03
   9  12   5    4.46    0.97
 -10 -12  -5   -0.51    0.58
 -10 -12  -5    0.35    0.65
  10  12   5    0.22    0.66
 -11 -12  -5    4.76    1.02
 -11 -12  -5    2.80    1.04
  11  12   5    4.28    1.09
 -12 -12  -5   11.81    1.50
 -12 -12  -5   11.84    1.66
  12  12   5   10.65    1.51
 -13 -12  -5   15.99    1.80
 -13 -12  -5   18.00    2.16
  13  12   5   14.92    1.85
   3 -13  -5   -1.35    0.64
  -3  13   5   -0.28    0.81
   2 -13  -5    2.64    1.02
  -2  13   5    3.51    1.13
   1 -13  -5   18.87    1.96
  -1  13   5   19.57    2.12
   0 -13  -5    8.41    1.39
   0  13   5    8.57    1.50
  -1 -13  -5    1.99    0.85
   1  13   5    3.10    1.04
  -2 -13  -5    0.26    0.64
   2  13   5   -0.49    0.66
  -3 -13  -5    1.18    0.69
   3  13   5    2.01    0.89
  -4 -13  -5   28.22    1.88
   4  13   5   27.50    1.76
  -5 -13  -5   17.96    1.64
  -5 -13  -5   16.89    1.68
   5  13   5   15.68    1.57
  -6 -13  -5    2.03    0.81
  -6 -13  -5    1.19    0.63
   6  13   5    0.71    0.68
   6  13   5    0.22    0.54
   6  13   5   -0.05    0.51
  -7 -13  -5    1.48    0.77
   7  13   5    3.10    0.81
   7  13   5    3.17    0.87
  -8 -13  -5   -0.39    0.60
   8  13   5    0.63    0.62
  -9 -13  -5    7.85    1.28
  -9 -13  -5    5.86    1.22
   9  13   5    7.60    1.19
 -10 -13  -5    4.06    1.08
 -10 -13  -5    5.72    1.13
  10  13   5    2.84    0.92
 -11 -13  -5   13.20    1.55
 -11 -13  -5   14.18    1.77
  11  13   5   12.46    1.59
 -12 -13  -5    0.37    0.78
  12  13   5    0.64    0.90
 -13 -13  -5    5.40    1.31
  13  13   5    6.46    1.42
   1 -14  -5    6.94    1.33
  -1  14   5    6.19    1.50
   0 -14  -5    3.09    1.06
   0  14   5    1.03    0.98
  -1 -14  -5    3.44    1.06
   1  14   5    5.26    1.27
  -2 -14  -5    1.48    0.82
   2  14   5    0.47    0.88
  -3 -14  -5   -0.03    0.68
   3  14   5    0.02    0.76
  -4 -14  -5    0.30    0.72
   4  14   5    1.60    0.87
  -5 -14  -5    5.02    1.07
   5  14   5    1.44    0.77
  -6 -14  -5   16.14    1.78
   6  14   5   13.54    1.61
  -7 -14  -5    0.15    0.73
   7  14   5    0.30    0.72
  -8 -14  -5    0.40    0.76
   8  14   5    0.78    0.75
   8  14   5    1.14    0.78
  -9 -14  -5    4.65    1.11
   9  14   5    1.53    0.82
 -10 -14  -5   10.34    1.56
  10  14   5    9.62    1.45
 -11 -14  -5    8.03    1.47
  11  14   5    8.18    1.41
  -2 -15  -5    4.40    1.19
   2  15   5    4.37    1.25
  -3 -15  -5   14.80    1.75
   3  15   5   18.11    2.13
  -4 -15  -5   12.66    1.63
   4  15   5   14.90    1.88
  -5 -15  -5   -0.66    0.68
   5  15   5   -0.37    0.70
   6  15   5    6.70    1.34
  -7 -15  -5    8.91    1.42
   7  15   5   12.77    1.60
  -8 -15  -5    9.40    1.62
   8  15   5   11.65    1.62
   9  15   5    7.83    1.43
   7  11  -6    7.93    1.52
   7  11  -6    8.11    1.36
   7  11  -6    6.90    1.39
  -7 -11   6   10.05    1.66
   6  11  -6   -0.07    0.72
  -6 -11   6    1.46    0.93
  -6 -11   6    0.31    0.93
   5  11  -6    9.83    1.52
  -5 -11   6   11.92    1.76
  -5 -11   6   10.58    1.55
   4  11  -6    9.45    1.55
  -4 -11   6   11.23    1.69
   3  11  -6    0.64    0.82
  -3 -11   6    0.63    0.89
   2  11  -6   -0.53    0.73
  -2 -11   6   -0.79    0.73
   1  11  -6   12.69    1.81
  -1 -11   6    8.86    1.56
   0  11  -6   11.18    1.72
   0 -11   6   12.04    1.74
  -1  11  -6    6.70    1.41
   1 -11   6   10.06    1.76
   9  10  -6    6.11    1.42
   9  10  -6    6.49    1.48
  -9 -10   6    7.04    1.50
   8  10  -6    7.44    1.38
   8  10  -6   12.50    1.66
  -8 -10   6   11.64    1.74
   7  10  -6   12.29    1.66
   7  10  -6   12.59    1.57
   7  10  -6   12.01    1.69
  -7 -10   6   17.40    1.96
   6  10  -6    1.07    0.74
  -6 -10   6    0.56    0.80
  -6 -10   6    0.37    0.85
   5  10  -6    3.63    0.97
  -5 -10   6    2.37    0.97
  -5 -10   6    4.27    1.08
   4  10  -6    4.19    1.08
  -4 -10   6    5.12    1.21
  -4 -10   6    3.97    1.02
   3  10  -6    5.90    1.24
  -3 -10   6    6.24    1.31
   2  10  -6    1.98    0.90
  -2 -10   6    1.52    0.93
   1  10  -6    0.56    0.77
  -1 -10   6    0.56    0.83
   0  10  -6    3.51    1.10
   0 -10   6    6.95    1.38
  -1  10  -6    5.92    1.30
   1 -10   6    5.70    1.33
  -2  10  -6   19.12    2.15
   2 -10   6   18.07    2.16
  -3  10  -6    2.94    1.08
   3 -10   6    0.63    0.90
  -4  10  -6    0.20    0.90
   4 -10   6    0.09    0.83
  10   9  -6   -0.15    0.83
 -10  -9   6    0.45    0.91
   9   9  -6    1.43    1.09
   9   9  -6    1.37    1.01
  -9  -9   6   -0.27    0.82
   8   9  -6   25.50    2.27
   8   9  -6   24.50    2.30
  -8  -9   6   25.91    2.13
   7   9  -6   15.18    1.56
   7   9  -6   17.46    1.95
   7   9  -6   20.01    2.05
  -7  -9   6   16.64    1.87
   6   9  -6   20.84    1.65
  -6  -9   6   18.20    1.94
  -6  -9   6   17.37    1.82
   5   9  -6    1.22    0.72
  -5  -9   6    1.38    0.83
  -5  -9   6    2.14    0.83
   4   9  -6    1.33    0.77
  -4  -9   6    1.02    0.77
  -4  -9   6    1.15    0.69
   3   9  -6   20.88    1.95
  -3  -9   6   21.68    2.04
  -3  -9   6   19.26    1.73
   2   9  -6   10.47    1.47
  -2  -9   6   11.31    1.49
   1   9  -6    6.79    1.26
  -1  -9   6    5.62    1.15
   0   9  -6    7.90    1.33
   0  -9   6    7.31    1.33
  -1   9  -6    1.68    0.90
   1  -9   6    2.58    0.99
  -2   9  -6    4.00    1.11
   2  -9   6    4.41    1.20
  -3   9  -6   19.57    2.06
   3  -9   6   18.65    1.96
  -4   9  -6   10.80    1.63
   4  -9   6   12.40    1.71
  -5   9  -6    6.74    1.44
   5  -9   6    4.95    1.30
  -6   9  -6    0.46    0.90
   6  -9   6   -0.09    0.74
  11   8  -6   15.07    2.02
 -11  -8   6   12.65    1.87
  10   8  -6    9.81    1.59
 -10  -8   6    9.33    1.60
   9   8  -6    2.86    1.09
  -9  -8   6    2.45    1.01
   8   8  -6    0.42    0.59
   8   8  -6    0.04    0.80
   8   8  -6    0.80    0.84
  -8  -8   6    0.94    0.82
   7   8  -6   -0.22    0.58
   7   8  -6   -1.07    0.57
   7   8  -6    0.37    0.72
  -7  -8   6    0.02    0.71
   6   8  -6   14.48    1.48
  -6  -8   6   15.12    1.67
   5   8  -6   21.57    1.62
  -5  -8   6   22.68    1.78
  -5  -8   6   22.16    1.74
   4   8  -6    0.05    0.56
  -4  -8   6   -0.57    0.65
  -4  -8   6   -0.05    0.57
   3   8  -6    1.84    0.78
  -3  -8   6    0.06    0.59
  -3  -8   6    0.00    0.55
   2   8  -6    3.10    0.89
  -2  -8   6    4.41    0.85
  -2  -8   6    3.51    0.96
   1   8  -6    5.50    1.06
  -1  -8   6    5.70    1.17
  -1  -8   6    5.57    0.91
   0   8  -6    1.93    0.81
   0  -8   6    3.22    0.90
  -1   8  -6    9.65    1.40
   1  -8   6    9.75    1.35
  -2   8  -6    1.91    0.83
   2  -8   6    0.54    0.70
  -3   8  -6    4.76    1.12
   3  -8   6    3.77    1.10
  -4   8  -6    3.33    1.06
   4  -8   6    5.16    1.15
  -5   8  -6    1.68    0.90
  -5   8  -6    3.46    0.97
   5  -8   6    3.19    1.06
  -6   8  -6   11.47    1.63
  -6   8  -6   12.17    1.53
   6  -8   6   10.25    1.68
  -7   8  -6    0.18    0.82
  -7   8  -6    0.52    0.91
   7  -8   6    2.56    1.09
  11   7  -6    4.69    1.28
 -11  -7   6    4.01    1.25
  10   7  -6    4.41    1.22
 -10  -7   6    3.89    1.14
   9   7  -6    6.15    1.29
  -9  -7   6   11.27    1.63
   8   7  -6    8.82    1.33
   8   7  -6    6.47    1.06
   8   7  -6    8.66    1.36
  -8  -7   6    7.73    1.36
   7   7  -6    2.92    0.80
   7   7  -6    4.37    1.04
   7   7  -6    2.78    0.96
  -7  -7   6    4.73    1.07
   6   7  -6    0.63    0.69
   6   7  -6    0.65    0.70
   6   7  -6    0.53    0.59
  -6  -7   6    0.15    0.59
   5   7  -6    6.38    1.01
  -5  -7   6    6.90    1.08
  -5  -7   6    5.89    1.06
   4   7  -6   36.48    1.92
  -4  -7   6   38.79    1.99
  -4  -7   6   35.89    2.04
   3   7  -6   14.23    1.45
  -3  -7   6   16.95    1.33
  -3  -7   6   17.09    1.60
   2   7  -6    4.86    0.92
  -2  -7   6    5.50    1.03
  -2  -7   6    5.72    0.92
   1   7  -6    5.53    1.01
  -1  -7   6    6.59    0.91
  -1  -7   6    7.18    1.13
   0   7  -6   10.30    1.31
   0  -7   6    8.20    1.17
   0  -7   6   10.54    1.04
  -1   7  -6   14.68    1.58
   1  -7   6   13.15    1.45
  -2   7  -6   33.60    2.04
   2  -7   6   29.85    1.95
  -3   7  -6    3.96    0.80
  -3   7  -6    2.77    0.94
   3  -7   6    3.29    0.91
  -4   7  -6    0.60    0.70
  -4   7  -6    0.58    0.62
   4  -7   6    0.86    0.73
  -5   7  -6   15.42    1.76
  -5   7  -6   12.63    1.44
   5  -7   6   12.02    1.56
  -6   7  -6    3.05    1.04
  -6   7  -6    3.55    0.96
   6  -7   6    6.11    1.32
  -7   7  -6    5.05    1.14
  -7   7  -6    4.28    1.07
   7  -7   6    5.04    1.19
  -8   7  -6    0.67    0.85
  -8   7  -6    1.74    0.88
   8  -7   6    2.04    0.99
  12   6  -6   10.39    1.72
 -12  -6   6   12.93    1.88
  11   6  -6   19.41    2.15
 -11  -6   6   18.78    2.09
  10   6  -6   12.42    1.71
 -10  -6   6   14.43    1.85
   9   6  -6    3.12    1.00
  -9  -6   6    0.79    0.81
   8   6  -6    6.30    1.02
   8   6  -6    5.74    1.12
  -8  -6   6    5.69    1.20
   7   6  -6    5.19    0.90
   7   6  -6    5.35    1.09
   7   6  -6    5.39    1.02
  -7  -6   6    3.14    0.90
   6   6  -6   63.32    2.66
   6   6  -6   59.39    2.39
   6   6  -6   61.88    2.57
  -6  -6   6   61.65    2.64
   5   6  -6    0.21    0.50
  -5  -6   6   -0.02    0.55
  -5  -6   6   -0.55    0.49
   4   6  -6    0.82    0.55
  -4  -6   6   -0.06    0.53
  -4  -6   6    0.20    0.52
   3   6  -6    2.79    0.73
  -3  -6   6    2.93    0.75
  -3  -6   6    2.56    0.78
   2   6  -6    1.93    0.70
  -2  -6   6    3.30    0.81
  -2  -6   6    3.05    0.72
   1   6  -6   59.90    2.43
  -1  -6   6   60.69    2.19
  -1  -6   6   62.47    2.50
   0   6  -6    0.65    0.56
   0  -6   6    0.88    0.60
   0  -6   6   -0.06    0.40
  -1   6  -6    4.90    0.67
  -1   6  -6    7.15    1.10
   1  -6   6    5.30    0.74
   1  -6   6    3.96    0.89
  -2   6  -6   20.94    1.21
  -2   6  -6   19.46    1.53
   2  -6   6   18.61    1.52
  -3   6  -6   41.11    1.80
  -3   6  -6   38.62    2.12
   3  -6   6   42.45    2.18
  -4   6  -6    4.52    0.97
  -4   6  -6    4.85    0.88
   4  -6   6    3.44    0.90
  -5   6  -6    1.46    0.79
  -5   6  -6    1.68    0.72
   5  -6   6    0.78    0.70
  -6   6  -6    1.58    0.80
  -6   6  -6    1.85    0.82
   6  -6   6    1.18    0.82
  -7   6  -6    7.62    1.27
  -7   6  -6    6.91    1.26
   7  -6   6    4.91    1.10
  -8   6  -6    9.79    1.46
  -8   6  -6    6.09    1.24
   8  -6   6    8.44    1.45
  -9   6  -6    5.12    1.16
  -9   6  -6    4.01    1.20
   9  -6   6    4.62    1.21
  12   5  -6    0.52    0.90
 -12  -5   6    2.64    1.10
  11   5  -6   19.33    2.00
 -11  -5   6   19.94    2.13
  10   5  -6    9.74    1.47
 -10  -5   6    9.16    1.48
   9   5  -6   13.29    1.32
   9   5  -6   12.80    1.56
  -9  -5   6   10.84    1.47
   8   5  -6    0.03    0.54
   8   5  -6   -0.79    0.48
  -8  -5   6    0.57    0.65
   7   5  -6    4.11    0.89
   7   5  -6    2.86    0.81
   7   5  -6    3.04    0.72
  -7  -5   6    2.55    0.82
   6   5  -6   26.58    1.69
   6   5  -6   25.89    1.52
   6   5  -6   27.00    1.68
  -6  -5   6   24.90    1.71
   5   5  -6   38.60    1.84
  -5  -5   6   39.35    1.98
   4   5  -6   28.18    1.53
  -4  -5   6   30.92    1.69
  -4  -5   6   24.32    1.54
   3   5  -6    0.38    0.48
  -3  -5   6    0.07    0.47
  -3  -5   6   -0.41    0.41
   2   5  -6   42.81    1.90
  -2  -5   6   39.91    1.87
  -2  -5   6   41.60    1.79
   1   5  -6   18.05    1.31
  -1  -5   6   17.33    1.14
  -1  -5   6   16.59    1.27
   0   5  -6   34.06    1.75
   0   5  -6   36.53    1.15
   0  -5   6   35.80    1.52
   0  -5   6   37.11    1.80
  -1   5  -6    4.09    0.79
  -1   5  -6    3.12    0.50
   1  -5   6    2.08    0.49
   1  -5   6    1.92    0.65
  -2   5  -6   -0.30    0.46
  -2   5  -6   -0.20    0.34
   2  -5   6   -0.07    0.45
   2  -5   6    0.61    0.35
  -3   5  -6    6.02    1.00
  -3   5  -6    7.64    0.88
   3  -5   6    5.21    0.92
  -4   5  -6   23.11    1.57
  -4   5  -6   21.74    1.40
   4  -5   6   21.46    1.56
  -5   5  -6    9.10    1.16
  -5   5  -6   10.45    1.32
   5  -5   6    8.20    1.16
  -6   5  -6    4.01    0.94
  -6   5  -6    5.60    1.00
   6  -5   6    3.98    0.90
  -7   5  -6    0.69    0.68
  -7   5  -6    1.59    0.82
   7  -5   6    1.19    0.73
  -8   5  -6    0.49    0.63
  -8   5  -6   -1.45    0.55
   8  -5   6    0.07    0.71
  -9   5  -6    6.22    1.18
  -9   5  -6    6.22    1.31
   9  -5   6    8.69    1.48
 -10   5  -6    0.34    0.70
 -10   5  -6    1.44    0.89
  10  -5   6    0.42    0.86
  12   4  -6    3.15    1.09
 -12  -4   6    4.38    1.20
  11   4  -6    1.28    0.87
 -11  -4   6    1.54    0.94
  10   4  -6    1.84    0.90
 -10  -4   6    1.77    0.90
   9   4  -6   28.19    1.64
   9   4  -6   33.97    2.07
  -9  -4   6   31.11    2.06
   8   4  -6   14.80    1.37
   8   4  -6   12.14    1.39
  -8  -4   6   13.38    1.53
   7   4  -6    7.62    1.14
   7   4  -6    7.92    1.01
  -7  -4   6    6.17    1.05
   6   4  -6    0.73    0.58
   6   4  -6    1.28    0.63
   6   4  -6   -0.03    0.42
  -6  -4   6    0.93    0.60
   5   4  -6   69.98    2.49
   5   4  -6   64.80    2.31
   5   4  -6   60.43    2.30
  -5  -4   6   67.22    2.52
   4   4  -6   51.74    2.04
  -4  -4   6   50.82    2.12
  -4  -4   6   52.42    2.08
   3   4  -6   19.48    1.24
  -3  -4   6   19.50    1.29
  -3  -4   6   20.15    1.29
   2   4  -6   26.73    1.45
  -2  -4   6   26.44    1.41
  -2  -4   6   25.66    1.42
   1   4  -6   16.60    1.20
  -1  -4   6   16.79    1.12
  -1  -4   6   15.82    1.17
   0   4  -6   24.56    0.83
   0   4  -6   21.00    1.33
   0  -4   6   26.41    1.43
   0  -4   6   25.08    1.26
  -1   4  -6   78.63    1.94
  -1   4  -6   76.85    2.56
   1  -4   6   77.51    2.17
   1  -4   6   74.11    2.48
  -2   4  -6   25.36    1.47
  -2   4  -6   24.69    1.14
   2  -4   6   26.18    1.14
   2  -4   6   24.24    1.44
  -3   4  -6    3.51    0.63
  -3   4  -6    3.74    0.78
   3  -4   6    4.08    0.52
   3  -4   6    1.62    0.59
  -4   4  -6   13.87    1.36
  -4   4  -6   13.31    1.08
   4  -4   6   13.59    1.39
  -5   4  -6    4.12    0.79
  -5   4  -6    4.93    0.89
   5  -4   6    4.38    0.93
  -6   4  -6   50.34    2.19
  -6   4  -6   47.59    2.19
   6  -4   6   44.41    2.24
  -7   4  -6   58.03    2.47
  -7   4  -6   55.79    2.48
   7  -4   6   53.57    2.53
  -8   4  -6   14.11    1.49
  -8   4  -6   13.66    1.61
   8  -4   6   11.54    1.46
  -9   4  -6    2.75    0.96
  -9   4  -6    1.21    0.72
   9  -4   6    1.17    0.85
 -10   4  -6    3.13    0.88
 -10   4  -6    2.59    1.02
  10  -4   6    1.05    0.91
 -11   4  -6   23.40    2.33
  11  -4   6   20.47    2.13
  12   3  -6   15.81    1.93
 -12  -3   6   16.85    1.98
  11   3  -6   10.44    1.49
 -11  -3   6   10.97    1.54
  10   3  -6    0.88    0.72
 -10  -3   6    1.71    0.85
   9   3  -6    1.72    0.66
   9   3  -6    1.51    0.82
  -9  -3   6    3.71    1.01
   8   3  -6    6.21    1.03
   8   3  -6    4.78    0.83
  -8  -3   6    7.90    1.22
   7   3  -6   19.66    1.32
   7   3  -6   20.09    1.45
  -7  -3   6   19.10    1.73
   6   3  -6    1.10    0.57
   6   3  -6    1.64    0.57
   6   3  -6    1.02    0.55
  -6  -3   6    1.47    0.62
   5   3  -6   17.76    1.25
   5   3  -6   18.60    1.21
   5   3  -6   18.55    1.24
  -5  -3   6   18.29    1.33
   4   3  -6    2.00    0.58
  -4  -3   6    1.19    0.52
   3   3  -6   11.36    1.07
  -3  -3   6   12.08    1.12
  -3  -3   6    9.55    1.03
   2   3  -6   13.45    1.02
  -2  -3   6   11.95    0.95
  -2  -3   6   13.85    1.20
   1   3  -6   14.71    1.06
  -1  -3   6   12.76    0.96
  -1  -3   6   14.49    1.02
   0   3  -6    7.57    0.91
   0   3  -6    7.95    0.44
   0  -3   6    7.24    0.88
   0  -3   6    7.37    0.81
  -1   3  -6    6.71    0.87
  -1   3  -6    6.70    0.54
   1  -3   6    6.28    0.70
   1  -3   6    5.48    0.75
  -2   3  -6    7.27    0.88
  -2   3  -6    7.07    0.67
   2  -3   6    8.48    0.77
   2  -3   6    8.30    0.99
  -3   3  -6    0.04    0.35
  -3   3  -6    0.07    0.41
   3  -3   6   -0.15    0.26
   3  -3   6    0.18    0.43
  -4   3  -6   23.97    1.39
  -4   3  -6   23.38    1.27
   4  -3   6   22.91    0.94
   4  -3   6   21.30    1.34
  -5   3  -6   15.55    1.23
  -5   3  -6   16.95    1.18
   5  -3   6   17.69    1.36
  -6   3  -6   10.54    1.16
  -6   3  -6   11.67    1.21
   6  -3   6   10.14    1.27
  -7   3  -6   -0.35    0.38
  -7   3  -6    0.63    0.61
   7  -3   6    0.06    0.56
  -8   3  -6   16.52    1.67
  -8   3  -6   19.86    1.47
   8  -3   6   19.74    1.63
  -9   3  -6    5.59    1.17
  -9   3  -6    3.92    0.89
   9  -3   6    4.43    1.06
 -10   3  -6    0.34    0.59
 -10   3  -6   -1.35    0.61
  10  -3   6   -1.07    0.58
 -11   3  -6    4.39    1.13
  11  -3   6    3.85    1.07
 -12   3  -6    1.55    0.94
  12  -3   6   -0.06    0.76
  12   2  -6    7.99    1.43
 -12  -2   6    5.54    1.23
  11   2  -6    2.93    1.02
 -11  -2   6    5.43    1.17
  10   2  -6   32.00    2.06
 -10  -2   6   35.22    2.14
   9   2  -6    5.65    0.92
   9   2  -6    6.32    1.10
  -9  -2   6    5.97    1.15
   8   2  -6   -0.07    0.47
   8   2  -6    1.02    0.64
  -8  -2   6    0.19    0.59
   7   2  -6   14.73    1.16
   7   2  -6   13.25    1.33
  -7  -2   6   14.69    1.46
   6   2  -6   13.81    1.29
   6   2  -6   12.84    1.19
  -6  -2   6   12.52    1.31
   5   2  -6   50.68    1.94
   5   2  -6   48.96    1.86
   5   2  -6   47.39    1.86
  -5  -2   6   47.27    1.26
  -5  -2   6   44.47    1.98
   4   2  -6   11.57    1.08
   4   2  -6   13.51    1.01
   4   2  -6   12.74    0.96
  -4  -2   6   12.42    0.50
  -4  -2   6   13.34    1.23
   3   2  -6    0.03    0.33
  -3  -2   6   -0.02    0.34
  -3  -2   6    0.44    0.47
   2   2  -6    2.78    0.58
  -2  -2   6    3.73    0.64
  -2  -2   6    3.03    0.60
   1   2  -6   45.90    1.72
  -1  -2   6   48.73    1.69
  -1  -2   6   46.46    1.69
   0   2  -6  180.68    4.01
   0   2  -6  179.41    3.05
   0  -2   6  179.72    3.83
   0  -2   6  178.73    3.88
  -1   2  -6   21.49    1.22
  -1   2  -6   24.08    0.85
   1  -2   6   23.21    1.19
   1  -2   6   21.49    1.05
  -2   2  -6   16.24    0.84
  -2   2  -6   17.88    1.11
   2  -2   6   16.42    0.91
   2  -2   6   15.84    1.05
  -3   2  -6   73.69    2.02
  -3   2  -6   72.46    2.28
   3  -2   6   68.60    1.84
   3  -2   6   72.69    2.29
  -4   2  -6    4.20    0.70
  -4   2  -6    3.84    0.62
   4  -2   6    3.77    0.68
   4  -2   6    3.86    0.49
  -5   2  -6  102.08    2.87
  -5   2  -6  101.28    2.83
   5  -2   6  101.05    2.23
   5  -2   6   98.05    3.00
  -6   2  -6    9.13    1.04
  -6   2  -6    7.24    0.92
   6  -2   6    8.59    1.11
  -7   2  -6    3.54    0.73
  -7   2  -6    2.83    0.74
   7  -2   6    2.22    0.67
  -8   2  -6   37.11    2.00
  -8   2  -6   43.54    1.91
   8  -2   6   37.67    2.05
  -9   2  -6    7.28    0.98
  -9   2  -6    5.33    1.11
   9  -2   6    7.57    1.24
 -10   2  -6   16.54    1.35
 -10   2  -6   18.47    1.88
  10  -2   6   15.18    1.71
 -11   2  -6    1.77    0.93
  11  -2   6   -0.15    0.67
 -12   2  -6    0.11    0.70
  12  -2   6    0.13    0.76
 -13   2  -6    0.26    0.90
  13  -2   6    0.60    0.84
  12   1  -6    2.91    1.07
 -12  -1   6    4.17    1.04
  11   1  -6   -0.13    0.72
 -11  -1   6    0.27    0.69
  10   1  -6    4.17    0.88
  10   1  -6    4.63    1.03
 -10  -1   6    5.75    1.12
   9   1  -6   10.46    1.29
   9   1  -6   12.62    1.30
  -9  -1   6   12.67    1.43
   8   1  -6   79.69    2.66
   8   1  -6   77.32    2.78
  -8  -1   6   82.57    2.96
  -8  -1   6   76.64    2.47
   7   1  -6   15.38    1.22
   7   1  -6   14.79    1.17
  -7  -1   6   16.40    1.50
  -7  -1   6   14.94    1.04
   6   1  -6    1.79    0.58
   6   1  -6    1.81    0.61
  -6  -1   6    0.65    0.54
  -6  -1   6    1.52    0.45
   5   1  -6    2.49    0.59
   5   1  -6    2.00    0.55
  -5  -1   6    1.93    0.41
  -5  -1   6    2.50    0.67
   4   1  -6   37.76    1.49
   4   1  -6   39.56    1.63
   4   1  -6   38.25    1.54
  -4  -1   6   35.75    1.12
  -4  -1   6   40.15    1.72
   3   1  -6  107.66    2.70
   3   1  -6  108.53    2.64
   3   1  -6  108.06    2.83
  -3  -1   6  103.42    2.88
  -3  -1   6  107.78    2.07
   2   1  -6   -0.36    0.31
  -2  -1   6    0.25    0.17
  -2  -1   6   -0.29    0.31
  -2  -1   6   -0.41    0.29
   1   1  -6   70.59    1.33
   1   1  -6   68.74    2.11
  -1  -1   6   68.87    1.94
  -1  -1   6   67.84    2.10
   0   1  -6   62.85    2.00
   0   1  -6   70.50    1.42
   0  -1   6   65.81    1.89
   0  -1   6   70.04    2.03
  -1   1  -6  107.71    2.72
  -1   1  -6  105.86    2.17
   1  -1   6  110.15    2.61
   1  -1   6  104.70    2.56
  -2   1  -6   82.54    1.95
  -2   1  -6   80.26    2.31
   2  -1   6   79.34    2.22
   2  -1   6   82.18    2.11
  -3   1  -6   54.64    1.67
  -3   1  -6   57.43    1.88
   3  -1   6   54.65    1.84
   3  -1   6   56.66    1.64
  -4   1  -6   12.13    0.86
  -4   1  -6   12.33    0.93
   4  -1   6    9.48    0.93
   4  -1   6   11.65    0.74
  -5   1  -6   37.69    1.57
  -5   1  -6   38.45    1.52
   5  -1   6   36.17    1.60
   5  -1   6   36.20    1.25
  -6   1  -6   52.66    1.87
  -6   1  -6   53.31    2.02
   6  -1   6   50.62    2.06
   6  -1   6   55.04    1.55
  -7   1  -6   31.91    1.49
  -7   1  -6   31.56    1.66
   7  -1   6   29.52    1.14
   7  -1   6   31.53    1.69
  -8   1  -6   33.57    1.84
  -8   1  -6   34.28    1.58
   8  -1   6   32.12    1.80
  -9   1  -6    0.34    0.63
  -9   1  -6    0.80    0.50
   9  -1   6    1.16    0.62
 -10   1  -6   10.76    1.35
  10  -1   6   14.85    1.66
 -11   1  -6    4.49    1.04
  11  -1   6    2.76    0.94
 -12   1  -6   21.33    2.07
  12  -1   6   17.46    1.86
 -13   1  -6    7.47    1.48
  13  -1   6    9.03    1.58
  12   0  -6   -1.35    0.72
 -12   0   6    0.98    0.79
  11   0  -6    7.31    1.30
 -11   0   6    7.20    1.24
  10   0  -6   -0.25    0.51
  10   0  -6    0.90    0.71
 -10   0   6    0.36    0.64
   9   0  -6    2.38    0.69
   9   0  -6    3.21    0.87
  -9   0   6    2.54    0.80
  -9   0   6    2.66    0.83
   8   0  -6    1.13    0.66
   8   0  -6    1.27    0.60
  -8   0   6    2.54    0.70
  -8   0   6    0.75    0.61
   7   0  -6    0.82    0.57
   7   0  -6    0.67    0.48
  -7   0   6    0.78    0.56
  -7   0   6    1.24    0.54
   6   0  -6   17.27    1.18
   6   0  -6   18.53    1.21
  -6   0   6   16.39    1.29
  -6   0   6   16.34    1.09
   5   0  -6    0.85    0.44
   5   0  -6    1.14    0.47
  -5   0   6    1.18    0.51
  -5   0   6    1.41    0.43
   4   0  -6    2.75    0.56
   4   0  -6    2.91    0.60
  -4   0   6    2.22    0.44
  -4   0   6    2.85    0.62
   3   0  -6   12.98    0.83
   3   0  -6   12.99    0.95
   3   0  -6   13.48    0.84
  -3   0   6   13.73    0.71
  -3   0   6   12.16    0.97
   2   0  -6   51.19    1.76
  -2   0   6   47.83    1.76
  -2   0   6   52.20    1.30
  -2   0   6   52.11    1.57
   1   0  -6   88.83    1.79
   1   0  -6   87.49    2.39
  -1   0   6   90.23    2.14
  -1   0   6   87.26    2.41
   0   0  -6    0.67    0.39
   0   0  -6    1.22    0.26
   0   0   6    1.01    0.35
   0   0   6    1.28    0.45
  -1   0  -6   12.71    0.63
  -1   0  -6   12.85    0.89
   1   0   6   12.04    0.85
   1   0   6   13.23    0.77
  -2   0  -6   31.07    1.27
  -2   0  -6   29.72    1.06
   2   0   6   31.57    1.19
   2   0   6   28.86    1.19
  -3   0  -6   52.55    1.71
  -3   0  -6   56.40    1.65
   3   0   6   52.33    1.71
   3   0   6   57.22    1.68
  -4   0  -6   33.67    1.36
  -4   0  -6   33.25    1.33
   4   0   6   33.05    1.23
   4   0   6   30.51    1.35
  -5   0  -6    5.15    0.71
  -5   0  -6    6.62    0.73
   5   0   6    5.82    0.74
   5   0   6    5.60    0.63
  -6   0  -6    5.18    0.66
  -6   0  -6    5.89    0.87
   6   0   6    5.79    0.84
   6   0   6    5.02    0.60
  -7   0  -6   48.09    1.99
  -7   0  -6   47.94    1.69
   7   0   6   50.45    2.04
   7   0   6   49.77    1.58
  -8   0  -6   21.01    1.45
  -8   0  -6   20.84    1.15
   8   0   6   20.99    1.45
   8   0   6   22.73    1.08
  -9   0  -6   25.21    1.67
  -9   0  -6   27.15    1.35
   9   0   6   27.58    1.74
 -10   0  -6    0.64    0.68
  10   0   6    1.38    0.70
 -11   0  -6    0.81    0.69
  11   0   6    0.58    0.69
 -12   0  -6    6.26    1.25
  12   0   6    7.20    1.32
 -13   0  -6    7.50    1.48
  13   0   6    7.75    1.43
 -14   0  -6    4.21    1.22
  14   0   6    4.85    1.31
  12  -1  -6    0.73    0.90
  11  -1  -6   19.90    1.98
 -11   1   6   20.28    1.92
 -11   1   6   21.88    1.77
  10  -1  -6   12.45    1.38
  10  -1  -6   13.38    1.57
 -10   1   6   12.27    1.49
 -10   1   6   13.43    1.51
   9  -1  -6   15.24    1.47
   9  -1  -6   16.76    1.58
  -9   1   6   16.79    1.62
  -9   1   6   18.48    1.67
   8  -1  -6    3.25    0.82
   8  -1  -6    4.16    0.80
  -8   1   6    3.04    0.79
  -8   1   6    3.76    0.84
   7  -1  -6   -0.39    0.43
   7  -1  -6    0.03    0.45
  -7   1   6    0.68    0.55
  -7   1   6   -0.02    0.53
   6  -1  -6   25.18    1.42
   6  -1  -6   26.58    1.38
  -6   1   6   27.42    1.52
  -6   1   6   25.65    1.37
   5  -1  -6   30.42    1.36
   5  -1  -6   28.40    1.44
  -5   1   6   29.54    1.35
  -5   1   6   29.34    1.51
   4  -1  -6   47.76    1.60
   4  -1  -6   46.31    1.79
  -4   1   6   46.71    1.81
  -4   1   6   48.88    1.60
   3  -1  -6   -0.05    0.35
   3  -1  -6    0.65    0.35
  -3   1   6    1.02    0.48
  -3   1   6    0.11    0.30
   2  -1  -6    1.30    0.35
   2  -1  -6    0.89    0.32
   2  -1  -6    1.15    0.44
  -2   1   6    1.09    0.35
  -2   1   6    0.62    0.38
   1  -1  -6   80.62    1.82
   1  -1  -6   77.41    2.20
  -1   1   6   79.47    2.26
  -1   1   6   80.81    1.83
   0  -1  -6   47.40    1.61
   0  -1  -6   49.57    1.31
   0   1   6   47.71    1.64
   0   1   6   50.09    1.32
  -1  -1  -6   52.45    1.68
  -1  -1  -6   55.43    1.45
   1   1   6   56.98    1.45
   1   1   6   57.40    1.76
  -2  -1  -6    0.16    0.27
  -2  -1  -6   -0.04    0.31
   2   1   6    0.43    0.37
   2   1   6    0.27    0.26
  -3  -1  -6    1.06    0.37
  -3  -1  -6    0.55    0.34
   3   1   6    1.04    0.39
   3   1   6    0.52    0.33
  -4  -1  -6   72.29    1.93
  -4  -1  -6   72.89    2.04
   4   1   6   70.70    2.00
   4   1   6   71.92    1.97
  -5  -1  -6   15.13    1.01
  -5  -1  -6   16.69    0.90
   5   1   6   17.69    0.94
   5   1   6   15.90    1.00
  -6  -1  -6   20.31    1.21
  -6  -1  -6   20.57    1.00
   6   1   6   22.50    1.25
   6   1   6   19.62    1.01
  -7  -1  -6    5.59    0.83
  -7  -1  -6    6.08    0.66
   7   1   6    5.74    0.70
   7   1   6    5.27    0.83
  -8  -1  -6    9.31    0.75
  -8  -1  -6    7.60    1.00
   8   1   6    9.77    1.16
   8   1   6    9.76    0.78
  -9  -1  -6   49.87    1.65
  -9  -1  -6   47.85    2.20
   9   1   6   50.55    1.77
   9   1   6   48.01    2.18
 -10  -1  -6   35.74    2.02
  10   1   6   39.52    2.09
 -11  -1  -6   23.46    1.80
  11   1   6   24.80    1.82
 -12  -1  -6    2.34    0.86
  12   1   6    2.72    0.92
 -13  -1  -6    7.90    1.50
  13   1   6    5.31    1.25
 -14  -1  -6   23.79    2.39
  14   1   6   21.21    2.24
  11  -2  -6    2.19    0.94
 -11   2   6    0.56    0.89
  10  -2  -6    5.54    1.11
  10  -2  -6    5.65    1.06
 -10   2   6    4.68    1.01
 -10   2   6    6.31    1.23
   9  -2  -6   19.67    1.50
   9  -2  -6   19.32    1.57
  -9   2   6   17.60    1.70
  -9   2   6   21.08    1.55
   8  -2  -6    2.49    0.78
   8  -2  -6    2.44    0.72
  -8   2   6    2.44    0.81
  -8   2   6    2.52    0.74
   7  -2  -6   13.04    1.23
   7  -2  -6   10.83    1.19
  -7   2   6   13.81    1.35
  -7   2   6   14.60    1.37
   6  -2  -6    4.84    0.82
   6  -2  -6    6.48    0.85
  -6   2   6    5.85    0.86
  -6   2   6    6.41    0.93
   5  -2  -6    5.49    0.81
   5  -2  -6    5.75    0.75
  -5   2   6    6.17    0.87
  -5   2   6    4.96    0.75
   4  -2  -6   34.31    1.56
   4  -2  -6   36.50    1.35
  -4   2   6   35.07    1.55
  -4   2   6   34.39    1.45
   3  -2  -6   10.88    1.01
   3  -2  -6   12.74    0.76
  -3   2   6   11.35    0.85
  -3   2   6   11.96    0.94
   2  -2  -6  108.26    2.27
   2  -2  -6  106.87    2.75
  -2   2   6  104.60    2.49
  -2   2   6  106.76    2.74
   1  -2  -6    0.04    0.26
   1  -2  -6   -0.17    0.18
   1  -2  -6    0.00    0.33
   1  -2  -6    0.71    0.22
  -1   2   6   -0.66    0.30
   0  -2  -6    0.12    0.33
   0  -2  -6   -0.06    0.24
   0   2   6   -0.04    0.19
   0   2   6    0.35    0.39
  -1  -2  -6    7.70    0.61
  -1  -2  -6    8.38    0.78
   1   2   6    8.70    0.84
   1   2   6    7.94    0.46
  -2  -2  -6  154.75    3.15
  -2  -2  -6  156.35    3.23
   2   2   6  152.61    2.89
   2   2   6  158.08    3.38
  -3  -2  -6  197.21    3.87
  -3  -2  -6  202.46    3.98
   3   2   6  205.26    3.79
   3   2   6  203.35    4.08
  -4  -2  -6   18.33    1.00
  -4  -2  -6   17.13    0.86
   4   2   6   17.63    0.97
   4   2   6   18.59    0.91
  -5  -2  -6   16.11    1.02
  -5  -2  -6   16.17    0.81
   5   2   6   16.11    0.96
   5   2   6   18.07    0.99
  -6  -2  -6    7.57    0.60
  -6  -2  -6    8.72    0.96
   6   2   6    7.86    0.77
   6   2   6    9.01    0.91
  -7  -2  -6   29.99    1.08
  -7  -2  -6   27.63    1.47
   7   2   6   27.68    1.40
   7   2   6   28.44    1.29
  -8  -2  -6   11.15    0.71
  -8  -2  -6   11.91    1.19
   8   2   6   10.51    1.10
   8   2   6   10.66    0.87
  -9  -2  -6    0.48    0.53
   9   2   6   -0.14    0.46
   9   2   6   -0.22    0.35
 -10  -2  -6    7.27    1.14
  10   2   6    7.70    0.94
  10   2   6    5.28    1.01
 -11  -2  -6   35.37    2.05
  11   2   6   35.47    1.68
  11   2   6   36.82    2.10
 -12  -2  -6    3.30    0.98
  12   2   6    3.55    1.01
 -13  -2  -6    6.02    1.29
  13   2   6    5.53    1.23
 -14  -2  -6    0.59    0.81
  14   2   6   -0.54    0.71
 -15  -2  -6    0.36    0.87
  15   2   6    0.26    0.86
 -11   3   6    4.15    1.25
  10  -3  -6   -0.19    0.59
 -10   3   6    0.54    0.85
   9  -3  -6   10.70    1.32
   9  -3  -6    9.89    1.28
  -9   3   6    8.05    1.14
  -9   3   6   12.43    1.54
   8  -3  -6    7.43    1.14
   8  -3  -6    5.26    0.97
  -8   3   6    5.70    0.94
  -8   3   6    6.32    1.13
   7  -3  -6   37.34    1.78
   7  -3  -6   33.99    1.83
  -7   3   6   32.73    1.73
  -7   3   6   35.81    1.90
   6  -3  -6   17.29    1.31
   6  -3  -6   18.77    1.21
  -6   3   6   19.40    1.38
  -6   3   6   18.90    1.28
   5  -3  -6    7.41    0.81
   5  -3  -6    5.26    0.82
  -5   3   6    7.22    0.93
  -5   3   6    7.95    0.93
   4  -3  -6    4.62    0.78
   4  -3  -6    4.67    0.60
  -4   3   6    5.99    0.81
  -4   3   6    5.33    0.76
   3  -3  -6   20.31    0.88
   3  -3  -6   18.30    1.15
  -3   3   6   18.58    1.12
  -3   3   6   20.37    1.14
   2  -3  -6   41.40    1.15
   2  -3  -6   39.80    1.61
  -2   3   6   41.90    1.53
  -2   3   6   42.43    1.61
   1  -3  -6    2.93    0.50
   1  -3  -6    2.33    0.29
   1  -3  -6    3.84    0.64
  -1   3   6    3.23    0.56
   0  -3  -6    7.19    0.32
   0  -3  -6    6.98    0.74
   0  -3  -6    7.94    0.72
   0   3   6    7.50    0.80
  -1  -3  -6    6.29    0.69
  -1  -3  -6    7.86    0.72
   1   3   6    6.63    0.73
   1   3   6    7.49    0.33
  -2  -3  -6    0.78    0.35
  -2  -3  -6    0.26    0.31
   2   3   6    0.26    0.19
   2   3   6    0.17    0.37
  -3  -3  -6  227.37    4.21
  -3  -3  -6  227.40    4.43
   3   3   6  229.05    4.00
   3   3   6  225.66    4.51
  -4  -3  -6   82.04    2.20
  -4  -3  -6   79.00    1.88
   4   3   6   75.54    2.15
   4   3   6   78.17    1.92
  -5  -3  -6   52.13    1.39
  -5  -3  -6   50.87    1.77
   5   3   6   47.95    1.66
   5   3   6   52.85    1.63
  -6  -3  -6   -0.08    0.36
  -6  -3  -6   -0.09    0.22
   6   3   6    0.21    0.36
   6   3   6    0.06    0.34
  -7  -3  -6   11.65    0.61
  -7  -3  -6    9.55    1.00
   7   3   6   13.77    1.00
   7   3   6   10.63    0.97
  -8  -3  -6   66.43    1.56
  -8  -3  -6   64.83    2.38
   8   3   6   66.27    2.17
   8   3   6   70.23    2.36
  -9  -3  -6   29.22    1.66
   9   3   6   30.67    1.66
   9   3   6   30.70    1.51
 -10  -3  -6   15.04    1.50
  10   3   6   15.21    1.52
  10   3   6   15.40    1.16
 -11  -3  -6    0.34    0.56
  11   3   6   -0.84    0.55
  11   3   6    0.57    0.51
 -12  -3  -6    5.94    1.22
  12   3   6    3.98    0.85
  12   3   6    5.94    1.17
 -13  -3  -6   15.99    1.79
  13   3   6   11.79    1.60
 -14  -3  -6   17.07    1.97
  14   3   6   13.38    1.81
 -15  -3  -6    2.31    1.03
  15   3   6    3.46    1.17
  11  -4  -6    1.52    0.84
 -11   4   6    3.06    1.21
  10  -4  -6   12.53    1.50
 -10   4   6   18.15    2.00
   9  -4  -6    2.30    0.86
  -9   4   6    3.07    1.12
   8  -4  -6    0.58    0.61
   8  -4  -6    0.90    0.66
  -8   4   6    0.10    0.73
   7  -4  -6    2.67    0.77
   7  -4  -6    3.26    0.75
  -7   4   6    1.55    0.68
  -7   4   6    3.07    0.84
   6  -4  -6   11.10    1.23
   6  -4  -6   10.94    1.05
  -6   4   6   10.90    1.12
  -6   4   6   10.49    1.23
   5  -4  -6   68.25    2.05
   5  -4  -6   61.43    2.38
  -5   4   6   69.56    2.49
  -5   4   6   68.08    2.23
   4  -4  -6    2.72    0.65
   4  -4  -6    2.23    0.48
  -4   4   6    2.17    0.61
  -4   4   6    2.63    0.60
   3  -4  -6    4.00    0.50
   3  -4  -6    4.13    0.73
  -3   4   6    3.00    0.63
  -3   4   6    3.09    0.60
   2  -4  -6   23.04    0.80
   2  -4  -6   23.46    1.28
  -2   4   6   24.02    1.24
  -2   4   6   22.92    1.17
   1  -4  -6    1.33    0.21
   1  -4  -6    0.19    0.38
  -1   4   6    1.33    0.49
   0  -4  -6   23.79    1.13
   0  -4  -6   24.67    1.19
   0   4   6   22.78    1.15
  -1  -4  -6   24.32    1.13
  -1  -4  -6   25.26    1.15
   1   4   6   22.32    1.14
  -2  -4  -6   37.81    1.34
  -2  -4  -6   36.42    1.38
   2   4   6   39.46    0.80
  -3  -4  -6    1.22    0.38
  -3  -4  -6    1.33    0.43
   3   4   6    2.00    0.50
   3   4   6    1.66    0.29
  -4  -4  -6   52.92    1.74
  -4  -4  -6   49.65    1.39
   4   4   6   48.96    1.71
   4   4   6   49.37    1.38
  -5  -4  -6   14.41    0.97
  -5  -4  -6   12.14    0.64
   5   4   6   11.82    0.91
   5   4   6   13.93    0.82
  -6  -4  -6   38.43    1.61
  -6  -4  -6   40.02    1.08
   6   4   6   38.70    1.58
   6   4   6   41.75    1.52
  -7  -4  -6    3.48    0.34
  -7  -4  -6    4.01    0.75
   7   4   6    3.95    0.68
   7   4   6    3.77    0.67
  -8  -4  -6    0.50    0.48
   8   4   6    0.86    0.48
   8   4   6    1.01    0.47
  -9  -4  -6    6.59    1.01
   9   4   6    6.20    0.89
   9   4   6    5.22    0.85
 -10  -4  -6   54.88    2.36
  10   4   6   56.45    2.36
  10   4   6   58.78    2.21
 -11  -4  -6   28.16    1.81
  11   4   6   27.18    1.80
 -12  -4  -6    2.18    0.84
  12   4   6    0.85    0.73
 -13  -4  -6    3.86    1.06
  13   4   6    4.75    1.15
  13   4   6    4.59    0.91
 -14  -4  -6    3.76    1.16
  14   4   6    2.49    1.06
 -15  -4  -6   15.89    2.01
  15   4   6   17.10    2.13
  10  -5  -6    8.24    1.39
 -10   5   6   12.21    1.80
   9  -5  -6    5.73    1.13
  -9   5   6    3.55    1.14
   8  -5  -6   10.98    1.42
  -8   5   6    9.07    1.42
   7  -5  -6    2.69    0.82
  -7   5   6    1.70    0.87
   6  -5  -6    4.57    0.93
   6  -5  -6    3.24    0.68
  -6   5   6    4.77    0.99
  -6   5   6    4.28    0.75
   5  -5  -6   -0.05    0.37
   5  -5  -6   -0.51    0.42
  -5   5   6   -0.17    0.48
  -5   5   6    0.51    0.45
   4  -5  -6    0.77    0.35
   4  -5  -6   -0.16    0.43
  -4   5   6   -0.34    0.39
  -4   5   6    0.28    0.52
   3  -5  -6   25.06    1.00
   3  -5  -6   27.81    1.49
  -3   5   6   26.12    1.30
  -3   5   6   25.92    1.47
   2  -5  -6    0.57    0.24
   2  -5  -6   -0.36    0.35
  -2   5   6    0.38    0.46
  -2   5   6   -0.23    0.33
   1  -5  -6    2.66    0.57
   1  -5  -6    2.27    0.26
  -1   5   6    2.60    0.53
  -1   5   6    2.26    0.53
   0  -5  -6   -0.18    0.28
   0  -5  -6   -0.27    0.32
   0   5   6    0.53    0.36
  -1  -5  -6   25.96    1.21
  -1  -5  -6   28.48    1.28
   1   5   6   26.54    1.24
  -2  -5  -6   27.46    1.18
  -2  -5  -6   30.14    1.28
   2   5   6   29.34    1.32
  -3  -5  -6   -0.02    0.35
  -3  -5  -6    0.05    0.28
   3   5   6    0.46    0.40
   3   5   6   -0.06    0.18
  -4  -5  -6   37.77    1.49
  -4  -5  -6   37.19    1.21
   4   5   6   36.39    1.49
   4   5   6   37.90    1.14
  -5  -5  -6    9.75    0.95
  -5  -5  -6    9.77    0.60
   5   5   6   10.08    0.99
   5   5   6   10.72    0.74
  -6  -5  -6    0.52    0.22
  -6  -5  -6    0.09    0.38
   6   5   6    0.67    0.43
   6   5   6    0.17    0.35
  -7  -5  -6   12.11    0.48
  -7  -5  -6   12.76    1.17
   7   5   6   10.40    1.03
   7   5   6   12.59    0.94
  -8  -5  -6   -0.01    0.46
   8   5   6   -0.20    0.41
   8   5   6    0.46    0.45
  -9  -5  -6    0.08    0.49
   9   5   6    0.34    0.46
 -10  -5  -6   28.60    1.72
  10   5   6   31.49    1.75
 -11  -5  -6    6.08    0.98
 -11  -5  -6    4.90    1.02
  11   5   6    6.45    1.13
 -12  -5  -6   11.90    1.32
 -12  -5  -6   13.22    1.55
  12   5   6   11.91    1.44
 -13  -5  -6   13.45    1.69
  13   5   6   10.75    1.56
 -14  -5  -6    0.70    0.77
  14   5   6    1.35    0.87
 -15  -5  -6   -0.19    0.76
  15   5   6    1.49    1.01
  10  -6  -6    0.91    0.79
 -10   6   6    0.42    0.96
   9  -6  -6    0.07    0.72
  -9   6   6    1.11    0.91
   8  -6  -6   28.56    2.01
  -8   6   6   27.31    2.10
   7  -6  -6   10.79    1.40
  -7   6   6    9.24    1.37
   6  -6  -6   32.61    1.94
  -6   6   6   32.98    2.05
   5  -6  -6    4.73    0.91
  -5   6   6    8.36    1.21
  -5   6   6    8.66    0.94
   4  -6  -6    2.87    0.79
   4  -6  -6    2.45    0.50
  -4   6   6    1.55    0.74
  -4   6   6    3.44    0.65
   3  -6  -6   31.02    1.16
   3  -6  -6   28.84    1.62
  -3   6   6   32.48    1.45
  -3   6   6   31.42    1.72
   2  -6  -6   17.26    1.22
   2  -6  -6   17.73    0.78
  -2   6   6   18.43    1.09
  -2   6   6   18.67    1.30
   1  -6  -6   65.10    1.41
   1  -6  -6   61.51    2.17
  -1   6   6   66.61    2.30
  -1   6   6   63.72    2.01
   0  -6  -6   18.17    1.16
   0  -6  -6   17.13    1.12
   0  -6  -6   19.13    0.54
   0   6   6   16.29    1.02
  -1  -6  -6    0.64    0.42
  -1  -6  -6    0.14    0.37
   1   6   6    0.45    0.40
  -2  -6  -6   27.69    1.35
  -2  -6  -6   28.56    1.25
   2   6   6   29.71    0.71
   2   6   6   27.75    1.32
  -3  -6  -6   33.22    1.28
  -3  -6  -6   30.33    1.37
   3   6   6   33.65    0.93
   3   6   6   34.80    1.49
  -4  -6  -6   61.80    1.71
  -4  -6  -6   61.06    2.03
   4   6   6   62.32    2.08
   4   6   6   62.07    1.56
  -5  -6  -6   12.35    0.98
  -5  -6  -6   12.91    0.71
   5   6   6   12.25    1.00
   5   6   6   12.52    0.75
  -6  -6  -6    2.31    0.35
  -6  -6  -6    2.20    0.57
   6   6   6    2.25    0.48
   6   6   6    1.96    0.59
  -7  -6  -6    0.63    0.42
  -7  -6  -6    0.28    0.19
   7   6   6    0.49    0.40
   7   6   6    0.28    0.43
  -8  -6  -6   13.30    1.10
   8   6   6   13.14    1.06
  -9  -6  -6   16.05    1.23
  -9  -6  -6   15.51    1.44
   9   6   6   14.20    1.17
 -10  -6  -6    3.09    0.77
 -10  -6  -6    2.88    0.73
  10   6   6    3.35    0.84
 -11  -6  -6    0.20    0.57
 -11  -6  -6    0.40    0.54
  11   6   6    0.50    0.61
 -12  -6  -6   13.92    1.56
 -12  -6  -6   13.89    1.44
  12   6   6   12.19    1.47
 -13  -6  -6   10.93    1.39
 -13  -6  -6    9.08    1.43
  13   6   6   11.95    1.56
 -14  -6  -6   25.68    2.33
 -14  -6  -6   23.63    1.80
  14   6   6   26.29    2.08
 -15  -6  -6    0.26    0.74
 -15  -6  -6   -0.23    0.78
  15   6   6   -0.12    0.87
   9  -7  -6    3.58    1.09
  -9   7   6    2.31    1.00
   8  -7  -6   -0.08    0.66
  -8   7   6   -1.09    0.66
   7  -7  -6    2.62    0.97
  -7   7   6    3.57    1.13
   6  -7  -6    8.04    1.23
  -6   7   6    9.85    1.47
   5  -7  -6    6.21    1.07
  -5   7   6    6.35    1.10
   4  -7  -6   20.34    1.80
  -4   7   6   19.70    1.78
  -4   7   6   15.89    1.10
   3  -7  -6    0.86    0.59
  -3   7   6    1.32    0.71
  -3   7   6    0.88    0.47
   2  -7  -6    4.03    0.50
   2  -7  -6    3.37    0.76
  -2   7   6    4.54    0.66
  -2   7   6    2.44    0.69
   1  -7  -6    5.84    0.50
   1  -7  -6    4.28    0.76
  -1   7   6    4.71    0.80
  -1   7   6    4.82    0.69
   0  -7  -6   26.78    1.45
   0  -7  -6   27.93    0.85
   0   7   6   26.67    1.31
  -1  -7  -6   10.51    1.05
  -1  -7  -6    8.72    0.95
  -1  -7  -6    9.00    0.46
   1   7   6    9.49    0.93
  -2  -7  -6    5.23    0.72
  -2  -7  -6    6.38    0.80
   2   7   6    6.18    0.41
   2   7   6    5.86    0.40
   2   7   6    4.84    0.69
  -3  -7  -6    0.13    0.35
  -3  -7  -6   -0.06    0.34
   3   7   6    0.14    0.41
   3   7   6    0.33    0.22
  -4  -7  -6   15.94    1.10
  -4  -7  -6   14.89    0.89
   4   7   6   15.90    1.11
   4   7   6   15.30    0.76
  -5  -7  -6   41.62    1.38
  -5  -7  -6   40.87    1.74
   5   7   6   43.54    1.41
   5   7   6   44.36    1.84
  -6  -7  -6   10.29    0.66
  -6  -7  -6   12.15    1.17
   6   7   6   13.77    1.12
   6   7   6    9.37    0.76
  -7  -7  -6    0.25    0.41
  -7  -7  -6   -0.08    0.20
   7   7   6    0.03    0.41
   7   7   6    0.86    0.43
  -8  -7  -6    1.90    0.64
   8   7   6    0.97    0.46
  -9  -7  -6   38.09    1.88
  -9  -7  -6   33.32    1.79
   9   7   6   34.16    1.71
 -10  -7  -6    0.87    0.57
 -10  -7  -6    0.32    0.57
  10   7   6   -0.16    0.50
 -11  -7  -6    4.66    0.95
 -11  -7  -6    4.94    1.00
  11   7   6    3.84    0.93
 -12  -7  -6    5.65    1.11
 -12  -7  -6    2.66    0.92
  12   7   6    2.39    0.93
 -13  -7  -6    2.65    0.94
 -13  -7  -6    3.67    1.00
  13   7   6    4.92    1.11
 -14  -7  -6    1.34    0.91
 -14  -7  -6    1.49    0.83
  14   7   6    3.71    1.14
 -15  -7  -6   10.93    1.53
 -15  -7  -6    9.16    1.51
  15   7   6    9.21    1.61
   8  -8  -6    4.40    1.14
  -8   8   6    4.39    1.25
   7  -8  -6    3.73    1.01
  -7   8   6    2.58    1.08
   6  -8  -6   -0.09    0.66
  -6   8   6    1.11    0.83
   5  -8  -6   21.75    1.71
  -5   8   6   18.28    1.81
   4  -8  -6   29.29    1.90
  -4   8   6   36.88    2.19
   3  -8  -6   11.79    1.34
  -3   8   6   11.39    1.02
  -3   8   6    9.15    1.28
   2  -8  -6   -0.05    0.53
  -2   8   6    0.11    0.43
  -2   8   6   -0.30    0.51
   1  -8  -6   -0.62    0.38
  -1   8   6    0.42    0.39
  -1   8   6   -0.53    0.47
   0  -8  -6   21.09    1.36
   0  -8  -6   20.14    0.87
   0   8   6   18.45    1.35
   0   8   6   22.73    1.21
  -1  -8  -6   28.34    1.51
  -1  -8  -6   28.14    1.56
  -1  -8  -6   26.35    0.93
   1   8   6   27.50    1.37
  -2  -8  -6    0.29    0.41
  -2  -8  -6    0.11    0.45
   2   8   6    0.48    0.41
  -3  -8  -6    0.22    0.36
  -3  -8  -6    0.41    0.43
   3   8   6    0.47    0.25
   3   8   6    0.97    0.48
   3   8   6    0.88    0.29
  -4  -8  -6   12.96    1.07
  -4  -8  -6   13.22    0.94
   4   8   6   14.22    1.10
   4   8   6   13.63    0.76
  -5  -8  -6    1.63    0.44
  -5  -8  -6    1.58    0.54
   5   8   6    2.40    0.66
   5   8   6    1.69    0.41
  -6  -8  -6    8.47    0.68
  -6  -8  -6    8.92    1.03
   6   8   6    6.68    0.92
   6   8   6    8.59    0.83
  -7  -8  -6   18.52    0.84
  -7  -8  -6   19.97    1.34
   7   8   6   22.28    1.20
   7   8   6   21.32    1.41
  -8  -8  -6   11.55    1.21
   8   8   6   13.77    1.09
  -9  -8  -6   11.56    1.27
  -9  -8  -6   12.99    1.38
   9   8   6   10.51    1.16
 -10  -8  -6    8.35    1.17
 -10  -8  -6    7.14    1.09
  10   8   6    3.55    0.81
 -11  -8  -6   10.67    1.31
 -11  -8  -6    7.75    1.17
  11   8   6   11.04    1.34
 -12  -8  -6   40.35    2.22
 -12  -8  -6   41.19    2.26
  12   8   6   37.18    2.16
 -13  -8  -6    0.56    0.73
 -13  -8  -6    0.99    0.78
  13   8   6   -0.26    0.67
 -14  -8  -6    1.99    0.93
 -14  -8  -6    2.50    0.98
  14   8   6    3.84    1.15
 -15  -8  -6    5.70    1.29
 -15  -8  -6    4.48    1.15
  15   8   6    7.62    1.51
   7  -9  -6   22.25    2.18
  -7   9   6   17.94    2.16
   6  -9  -6   10.25    1.54
  -6   9   6    8.93    1.50
   5  -9  -6    1.41    0.79
  -5   9   6    1.53    0.88
   4  -9  -6    1.79    0.80
  -4   9   6    2.53    0.96
   3  -9  -6    5.59    1.12
  -3   9   6    4.58    1.09
   2  -9  -6   44.42    2.20
  -2   9   6   41.68    2.23
   1  -9  -6    3.76    0.83
  -1   9   6    2.93    0.83
  -1   9   6    4.15    0.70
   0  -9  -6   10.82    1.22
   0   9   6   10.80    1.01
   0   9   6   10.55    1.30
  -1  -9  -6    2.66    0.70
   1   9   6    2.47    0.60
  -2  -9  -6   11.64    1.13
  -2  -9  -6   13.27    0.76
  -2  -9  -6   11.62    1.20
   2   9   6   10.09    1.05
  -3  -9  -6   17.51    1.20
  -3  -9  -6   19.72    1.35
   3   9   6   20.98    0.96
   3   9   6   22.02    1.34
   3   9   6   19.67    0.92
  -4  -9  -6   11.03    1.01
  -4  -9  -6    8.81    1.04
   4   9   6   10.64    0.74
   4   9   6   11.33    1.12
  -5  -9  -6    3.63    0.72
  -5  -9  -6    4.12    0.64
   5   9   6    4.79    0.64
   5   9   6    6.52    0.97
  -6  -9  -6    0.04    0.43
  -6  -9  -6    0.22    0.32
   6   9   6   -0.01    0.46
   6   9   6    0.21    0.37
  -7  -9  -6    1.74    0.61
  -7  -9  -6    2.61    0.49
   7   9   6    1.59    0.52
   7   9   6    0.88    0.56
  -8  -9  -6   17.44    1.33
   8   9   6   15.86    1.19
  -9  -9  -6   12.73    1.39
  -9  -9  -6   14.50    1.43
   9   9   6   18.66    1.30
 -10  -9  -6   -0.46    0.49
 -10  -9  -6   -0.21    0.55
  10   9   6    0.07    0.52
 -11  -9  -6    3.51    0.93
 -11  -9  -6    1.85    0.81
  11   9   6    2.70    0.83
 -12  -9  -6    4.72    1.07
 -12  -9  -6    3.95    1.04
  12   9   6    5.28    1.10
 -13  -9  -6   29.18    2.06
 -13  -9  -6   24.56    1.88
  13   9   6   24.72    1.96
 -14  -9  -6    8.14    1.43
 -14  -9  -6   11.79    1.62
  14   9   6    8.68    1.46
 -15  -9  -6    0.71    0.83
 -15  -9  -6    0.29    0.79
  15   9   6    0.53    0.92
   6 -10  -6    9.90    1.52
  -6  10   6    8.14    1.42
   5 -10  -6   11.30    1.60
  -5  10   6   11.90    1.68
   4 -10  -6   -0.11    0.72
  -4  10   6   -0.06    0.66
   3 -10  -6    0.20    0.65
  -3  10   6    0.08    0.72
   2 -10  -6    1.24    0.76
  -2  10   6    0.59    0.68
   1 -10  -6    7.78    1.16
  -1  10   6    6.41    1.12
   0 -10  -6   19.60    1.51
   0  10   6   18.41    1.20
   0  10   6   15.93    1.62
  -1 -10  -6    2.95    0.78
   1  10   6    2.75    0.65
   1  10   6    2.21    0.75
  -2 -10  -6    0.14    0.54
  -2 -10  -6   -0.07    0.50
   2  10   6    0.25    0.45
  -3 -10  -6   14.08    1.26
  -3 -10  -6   15.81    1.30
   3  10   6   16.74    1.24
  -4 -10  -6   17.99    1.20
  -4 -10  -6   18.25    1.33
   4  10   6   18.77    1.04
   4  10   6   18.75    1.01
   4  10   6   17.14    1.33
  -5 -10  -6    7.31    0.87
  -5 -10  -6    6.82    1.00
   5  10   6    8.04    0.83
   5  10   6    8.63    1.10
  -6 -10  -6    5.26    0.73
  -6 -10  -6    5.72    0.90
   6  10   6    5.82    0.76
   6  10   6    5.91    1.00
  -7 -10  -6    6.91    1.03
   7  10   6    6.84    0.88
   7  10   6    6.68    1.06
  -8 -10  -6   13.53    1.39
   8  10   6   14.47    1.16
  -9 -10  -6   12.87    1.40
  -9 -10  -6   12.21    1.42
   9  10   6   13.06    1.31
 -10 -10  -6    1.33    0.70
 -10 -10  -6    2.93    0.87
  10  10   6    0.85    0.67
 -11 -10  -6    7.46    1.20
 -11 -10  -6    5.58    1.14
  11  10   6    5.16    1.02
 -12 -10  -6    3.91    1.12
 -12 -10  -6    2.69    0.90
  12  10   6    2.58    0.94
 -13 -10  -6    3.53    1.03
 -13 -10  -6    1.48    0.90
  13  10   6    1.85    0.90
 -14 -10  -6   10.03    1.60
 -14 -10  -6    9.21    1.48
  14  10   6   10.86    1.64
 -15 -10  -6    6.59    1.38
 -15 -10  -6    5.68    1.38
  15  10   6    4.67    1.31
   5 -11  -6    7.93    1.46
  -5  11   6    5.89    1.31
   4 -11  -6   17.05    1.94
  -4  11   6   14.36    1.88
   3 -11  -6   29.60    2.12
   2 -11  -6    3.58    0.97
  -2  11   6    1.71    0.81
   1 -11  -6    4.17    0.99
  -1  11   6    6.25    1.23
   0 -11  -6   17.46    1.69
   0  11   6   17.62    1.78
  -1 -11  -6   36.88    2.01
   1  11   6   35.02    2.12
   1  11   6   36.57    1.72
  -2 -11  -6   35.48    1.92
   2  11   6   36.00    1.75
   2  11   6   34.92    2.02
  -3 -11  -6    8.87    1.26
  -3 -11  -6    9.37    1.18
   3  11   6    8.08    1.05
  -4 -11  -6    0.31    0.61
  -4 -11  -6    0.71    0.56
   4  11   6    1.27    0.62
  -5 -11  -6   16.86    1.57
  -5 -11  -6   15.13    1.18
   5  11   6   15.90    1.07
   5  11   6   15.75    1.09
   5  11   6   13.57    1.42
  -6 -11  -6   48.55    1.92
  -6 -11  -6   46.30    2.22
   6  11   6   47.57    1.88
   6  11   6   49.94    2.32
  -7 -11  -6   11.26    1.27
   7  11   6    9.83    1.26
   7  11   6   12.34    1.20
  -8 -11  -6    8.27    1.20
   8  11   6    7.57    1.02
  -9 -11  -6    2.65    0.87
  -9 -11  -6    2.99    0.82
   9  11   6    1.33    0.65
 -10 -11  -6    8.21    1.20
 -10 -11  -6    7.98    1.33
  10  11   6   10.70    1.30
 -11 -11  -6   23.43    2.17
 -11 -11  -6   16.12    1.68
  11  11   6   18.11    1.71
 -12 -11  -6    3.34    0.98
 -12 -11  -6    5.85    1.27
  12  11   6    5.70    1.17
 -13 -11  -6    6.35    1.28
 -13 -11  -6    7.74    1.35
  13  11   6    8.36    1.42
 -14 -11  -6   -0.51    0.77
 -14 -11  -6   -0.14    0.68
  14  11   6   -0.35    0.80
   4 -12  -6    2.14    1.03
  -4  12   6    2.45    1.03
   3 -12  -6    4.66    1.23
  -3  12   6    3.98    1.19
   2 -12  -6   10.40    1.61
  -2  12   6    8.10    1.46
   1 -12  -6    9.87    1.48
  -1  12   6    9.46    1.51
   0 -12  -6    1.57    0.84
   0  12   6    2.62    0.92
  -1 -12  -6    0.97    0.73
   1  12   6    2.62    0.91
  -2 -12  -6    6.50    1.10
   2  12   6    5.49    1.12
   2  12   6    6.61    0.94
  -3 -12  -6   28.55    1.82
   3  12   6   30.18    1.72
  -4 -12  -6    4.62    0.93
  -4 -12  -6    5.40    1.08
   4  12   6    6.63    1.05
  -5 -12  -6    2.28    0.73
  -5 -12  -6    1.78    0.80
   5  12   6    0.67    0.61
  -6 -12  -6    8.34    1.21
  -6 -12  -6    7.45    0.99
   6  12   6    8.94    1.25
   6  12   6    6.32    0.91
  -7 -12  -6   21.51    1.69
   7  12   6   22.16    1.71
   7  12   6   20.47    1.39
  -8 -12  -6   45.80    2.32
   8  12   6   44.31    2.07
   8  12   6   43.05    2.31
  -9 -12  -6    2.56    0.83
   9  12   6    1.31    0.64
 -10 -12  -6    0.20    0.61
 -10 -12  -6    0.84    0.78
  10  12   6    0.34    0.61
 -11 -12  -6    2.13    1.01
 -11 -12  -6    2.41    0.91
  11  12   6    2.68    0.88
 -12 -12  -6   15.76    1.73
 -12 -12  -6   15.30    1.84
  12  12   6   14.38    1.68
 -13 -12  -6   19.58    2.17
 -13 -12  -6   17.46    1.90
  13  12   6   18.28    1.97
 -14 -12  -6    3.38    1.08
 -14 -12  -6    1.81    1.14
  14  12   6    2.89    1.16
   2 -13  -6    6.03    1.31
  -2  13   6    8.35    1.59
   1 -13  -6   26.69    2.14
  -1  13   6   23.28    2.30
   0 -13  -6   16.56    1.83
   0  13   6   14.00    1.71
  -1 -13  -6   10.98    1.49
   1  13   6   12.21    1.63
  -2 -13  -6    0.66    0.70
   2  13   6    0.21    0.76
  -3 -13  -6    2.45    0.88
   3  13   6    1.51    0.67
   3  13   6    1.32    0.81
  -4 -13  -6   16.05    1.71
  -4 -13  -6   19.46    1.55
   4  13   6   16.11    1.55
[truncated: 15,794,235 more chars]
